# Supplementary material for: Differences in Gut Microbiome Composition Between Sympatric Wild and Allopatric Laboratory Populations of Omnivorous Cockroaches
Source: Front Microbiol. 2021 Jul 28;12:703785. doi: 10.3389/fmicb.2021.703785 (PMC8355983; doi:10.3389/fmicb.2021.703785)
Supplement: Supplementary file 5 [file Table_4.XLSX]

## Sheet: Lab v FL Lab T0 
	baseMean	log2FoldChange	lfcSE	stat	pvalue	padj
k__Bacteria(100);p__Bacteroidetes(100);c__Bacteroidia(100);o__Bacteroidales(100);o__Bacteroidales_unclassified(100);o__Bacteroidales_unclassified(100);o__Bacteroidales_unclassified(100);.20	43.9765	-26.1031	3.86288	-6.75741	1.40477e-11	1.32483e-09		Total	377
k__Bacteria(100);p__Firmicutes(100);c__Clostridia(100);o__Clostridiales(100);f__Ruminococcaceae(100);f__Ruminococcaceae_unclassified(100);f__Ruminococcaceae_unclassified(100);.14	11.381	-24.2861	4.41699	-5.49834	3.83385e-08	1.84563e-06		Increase	191
k__Bacteria(100);p__Bacteroidetes(100);p__Bacteroidetes_unclassified(100);p__Bacteroidetes_unclassified(100);p__Bacteroidetes_unclassified(100);p__Bacteroidetes_unclassified(100);p__Bacteroidetes_unclassified(100);.14	120.178	-24.2423	1.40088	-17.3051	4.3078e-67	1.18206e-63		Decrease	186
k__Bacteria(100);p__Firmicutes(100);c__Clostridia(100);o__Clostridiales(100);f__Ruminococcaceae(100);f__Ruminococcaceae_unclassified(100);f__Ruminococcaceae_unclassified(100);.56	18.281	-24.1331	2.87489	-8.39444	4.68134e-17	6.11695e-15
k__Bacteria(100);p__Firmicutes(100);c__Clostridia(100);o__Clostridiales(100);f__Ruminococcaceae(100);f__Ruminococcaceae_unclassified(67);f__Ruminococcaceae_unclassified(67);	35.0176	-23.7162	2.49776	-9.49501	2.2019e-21	3.55413e-19
k__Bacteria(100);p__Firmicutes(100);c__Clostridia(100);o__Clostridiales(100);f__Veillonellaceae(100);g__Phascolarctobacterium(100);g__Phascolarctobacterium_unclassified(100);.1	41.2231	-23.6102	2.18589	-10.8012	3.39834e-27	7.17312e-25
k__Bacteria(100);p__Bacteroidetes(100);c__Bacteroidia(100);o__Bacteroidales(100);o__Bacteroidales_unclassified(100);o__Bacteroidales_unclassified(100);o__Bacteroidales_unclassified(100);.12	61.946	-23.3605	1.5829	-14.7581	2.72961e-49	1.49801e-46
k__Bacteria(100);p__Proteobacteria(100);c__Deltaproteobacteria(100);o__Desulfovibrionales(100);f__Desulfovibrionaceae(100);g__Desulfovibrio(100);g__Desulfovibrio_unclassified(80);	26.9084	-23.2475	1.5342	-15.1528	7.2571e-52	6.63783e-49
k__Bacteria(100);p__Tenericutes(100);c__Mollicutes(100);o__Entomoplasmatales(100);f__Entomoplasmataceae(100);f__Entomoplasmataceae_unclassified(100);f__Entomoplasmataceae_unclassified(100);	63.4693	-23.1835	2.07531	-11.1711	5.64694e-29	1.54952e-26
k__Bacteria(100);p__Bacteroidetes(100);c__Bacteroidia(100);o__Bacteroidales(100);f__Porphyromonadaceae(100);g__Candidatus_Azobacteroides(100);g__Candidatus_Azobacteroides_unclassified(100);.23	25.001	-22.8581	3.83711	-5.9571	2.56761e-09	1.53163e-07
k__Bacteria(100);p__Bacteroidetes(100);c__Bacteroidia(100);o__Bacteroidales(100);f__Porphyromonadaceae(100);g__Candidatus_Azobacteroides(100);g__Candidatus_Azobacteroides_unclassified(100);.17	32.9647	-22.6226	1.45649	-15.5322	2.09929e-54	2.88022e-51
k__Bacteria(100);k__Bacteria_unclassified(100);k__Bacteria_unclassified(100);k__Bacteria_unclassified(100);k__Bacteria_unclassified(100);k__Bacteria_unclassified(100);k__Bacteria_unclassified(100);.18	26.0278	-22.1444	1.96943	-11.2441	2.47679e-29	7.55145e-27
k__Bacteria(100);p__Proteobacteria(100);c__Alphaproteobacteria(100);c__Alphaproteobacteria_unclassified(70);c__Alphaproteobacteria_unclassified(70);c__Alphaproteobacteria_unclassified(70);c__Alphaproteobacteria_unclassified(70);	7.24682	-22.1019	2.03488	-10.8615	1.75782e-27	4.01954e-25
k__Bacteria(100);k__Bacteria_unclassified(100);k__Bacteria_unclassified(100);k__Bacteria_unclassified(100);k__Bacteria_unclassified(100);k__Bacteria_unclassified(100);k__Bacteria_unclassified(100);.155	6.40391	-21.9212	5.67393	-3.8635	0.000111775	0.00179363
k__Bacteria(100);p__Firmicutes(100);c__Clostridia(100);o__Clostridiales(100);f__Ruminococcaceae(100);g__Ruminococcus(100);s__flavefaciens(100);	7.81549	-21.5132	5.8097	-3.70298	0.00021308	0.00298312
k__Bacteria(100);p__Bacteroidetes(100);p__Bacteroidetes_unclassified(100);p__Bacteroidetes_unclassified(100);p__Bacteroidetes_unclassified(100);p__Bacteroidetes_unclassified(100);p__Bacteroidetes_unclassified(100);.23	27.5104	-20.6023	1.79075	-11.5048	1.24718e-30	4.27784e-28
k__Bacteria(100);p__Bacteroidetes(100);p__Bacteroidetes_unclassified(100);p__Bacteroidetes_unclassified(100);p__Bacteroidetes_unclassified(100);p__Bacteroidetes_unclassified(100);p__Bacteroidetes_unclassified(100);.37	14.3953	-20.2933	1.86261	-10.8951	1.21637e-27	3.03429e-25
k__Bacteria(100);p__Proteobacteria(100);c__Alphaproteobacteria(100);o__Rhodospirillales(100);f__Acetobacteraceae(100);f__Acetobacteraceae_unclassified(100);f__Acetobacteraceae_unclassified(100);	6.61853	-19.6609	3.86963	-5.08082	3.75809e-07	1.32208e-05
k__Bacteria(100);p__Firmicutes(100);c__Clostridia(100);o__Clostridiales(100);f__Lachnospiraceae(100);f__Lachnospiraceae_unclassified(92);f__Lachnospiraceae_unclassified(92);	60.1648	-19.3213	1.30068	-14.8547	6.48727e-50	4.45027e-47
k__Bacteria(100);p__Bacteroidetes(100);c__Bacteroidia(100);o__Bacteroidales(100);f__Porphyromonadaceae(100);g__Dysgonomonas(100);g__Dysgonomonas_unclassified(100);.2	89.1697	-18.8102	1.61899	-11.6185	3.32055e-31	1.30166e-28
k__Bacteria(100);p__Verrucomicrobia(100);c__Verruco-5(100);o__LD1-PB3(100);o__LD1-PB3_unclassified(100);o__LD1-PB3_unclassified(100);o__LD1-PB3_unclassified(100);.2	6.34259	-18.5948	4.26658	-4.35823	1.31119e-05	0.000302344
k__Bacteria(100);p__Elusimicrobia(100);c__Elusimicrobia(100);o__Elusimicrobiales(100);f__Elusimicrobiaceae(100);g__Elusimicrobium(100);s__minutum(100);.1	4.54416	-18.2548	1.79831	-10.1511	3.2769e-24	6.42272e-22
k__Bacteria(100);p__Bacteroidetes(100);c__Bacteroidia(100);o__Bacteroidales(100);f__Porphyromonadaceae(100);g__Candidatus_Azobacteroides(100);g__Candidatus_Azobacteroides_unclassified(100);.14	40.6406	-18.2519	1.34096	-13.6111	3.44232e-42	1.57429e-39
k__Bacteria(100);p__Bacteroidetes(100);c__Bacteroidia(100);o__Bacteroidales(100);f__Bacteroidaceae(98);g__Bacteroides(98);g__Bacteroides_unclassified(98);	12.2523	-18.1288	2.07987	-8.7163	2.87449e-18	3.94381e-16
k__Bacteria(100);p__Firmicutes(100);c__Erysipelotrichi(100);o__Erysipelotrichales(100);f__Erysipelotrichaceae(100);g__Clostridium(100);g__Clostridium_unclassified(100);.3	6.94843	-18.0215	3.24628	-5.55142	2.83361e-08	1.38847e-06
k__Bacteria(100);p__Bacteroidetes(100);c__Bacteroidia(100);o__Bacteroidales(100);f__Porphyromonadaceae(100);g__Dysgonomonas(100);g__Dysgonomonas_unclassified(100);.14	16.177	-17.7677	2.47116	-7.19003	6.47788e-13	7.11012e-11
k__Bacteria(100);p__Proteobacteria(100);c__Betaproteobacteria(100);c__Betaproteobacteria_unclassified(100);c__Betaproteobacteria_unclassified(100);c__Betaproteobacteria_unclassified(100);c__Betaproteobacteria_unclassified(100);	87.2212	-13.1451	1.37133	-9.58565	9.18792e-22	1.57573e-19
k__Bacteria(100);p__Verrucomicrobia(100);c__Verrucomicrobiae(100);o__Verrucomicrobiales(100);f__Verrucomicrobiaceae(100);f__Verrucomicrobiaceae_unclassified(100);f__Verrucomicrobiaceae_unclassified(100);.1	56.3448	-11.4592	1.9278	-5.94417	2.77864e-09	1.62225e-07
k__Bacteria(100);p__Firmicutes(100);c__Bacilli(100);o__Lactobacillales(100);o__Lactobacillales_unclassified(99);o__Lactobacillales_unclassified(99);o__Lactobacillales_unclassified(99);.1	25.9061	-11.3695	2.3136	-4.9142	8.91451e-07	2.81166e-05
k__Bacteria(100);p__Bacteroidetes(100);c__Bacteroidia(100);o__Bacteroidales(100);f__Bacteroidaceae(100);g__Bacteroides(100);g__Bacteroides_unclassified(100);	272.364	-10.9193	2.02476	-5.39291	6.93273e-08	3.11859e-06
k__Bacteria(100);p__Firmicutes(100);c__Erysipelotrichi(100);o__Erysipelotrichales(100);f__Erysipelotrichaceae(100);f__Erysipelotrichaceae_unclassified(100);f__Erysipelotrichaceae_unclassified(100);.4	32.9533	-10.6221	1.80538	-5.88359	4.01458e-09	2.24817e-07
k__Bacteria(100);p__Bacteroidetes(100);c__Bacteroidia(100);o__Bacteroidales(100);f__Porphyromonadaceae(100);g__Paludibacter(100);g__Paludibacter_unclassified(100);.5	62.156	-10.4575	1.55007	-6.74646	1.51495e-11	1.34097e-09
k__Bacteria(100);k__Bacteria_unclassified(100);k__Bacteria_unclassified(100);k__Bacteria_unclassified(100);k__Bacteria_unclassified(100);k__Bacteria_unclassified(100);k__Bacteria_unclassified(100);.29	27.6805	-10.2727	2.96551	-3.46405	0.000532107	0.00643217
k__Bacteria(100);p__Bacteroidetes(100);c__Bacteroidia(100);o__Bacteroidales(100);f__Porphyromonadaceae(100);g__Candidatus_Azobacteroides(100);g__Candidatus_Azobacteroides_unclassified(100);.8	63.6239	-10.2417	1.06641	-9.60394	7.69477e-22	1.40763e-19
k__Bacteria(100);p__Bacteroidetes(100);c__Bacteroidia(100);o__Bacteroidales(100);f__Porphyromonadaceae(100);g__Candidatus_Azobacteroides(100);g__Candidatus_Azobacteroides_unclassified(100);.2	118.73	-10.1581	1.32158	-7.6863	1.51452e-14	1.88902e-12
k__Bacteria(100);p__Firmicutes(100);c__Clostridia(100);o__Clostridiales(100);f__Ruminococcaceae(100);g__Ruminococcus(100);g__Ruminococcus_unclassified(100);.5	44.9904	-10.1537	2.61149	-3.88808	0.00010104	0.00165032
k__Bacteria(100);p__Bacteroidetes(100);p__Bacteroidetes_unclassified(100);p__Bacteroidetes_unclassified(100);p__Bacteroidetes_unclassified(100);p__Bacteroidetes_unclassified(100);p__Bacteroidetes_unclassified(100);.36	30.6489	-9.97977	2.09714	-4.75875	1.94795e-06	5.61155e-05
k__Bacteria(100);p__Bacteroidetes(100);c__Bacteroidia(100);o__Bacteroidales(100);f__Rikenellaceae(100);f__Rikenellaceae_unclassified(100);f__Rikenellaceae_unclassified(100);.28	20.9703	-9.77264	1.58746	-6.15616	7.45308e-10	4.98811e-08
k__Bacteria(100);p__Firmicutes(100);c__Erysipelotrichi(100);o__Erysipelotrichales(100);f__Erysipelotrichaceae(100);f__Erysipelotrichaceae_unclassified(100);f__Erysipelotrichaceae_unclassified(100);.3	28.1193	-9.75319	1.68149	-5.80033	6.61851e-09	3.63224e-07
k__Bacteria(100);p__Bacteroidetes(100);c__Bacteroidia(100);o__Bacteroidales(100);o__Bacteroidales_unclassified(100);o__Bacteroidales_unclassified(100);o__Bacteroidales_unclassified(100);.26	29.2471	-9.64184	1.63834	-5.88514	3.97722e-09	2.24817e-07
k__Bacteria(100);p__Bacteroidetes(100);c__Bacteroidia(100);o__Bacteroidales(100);f__Bacteroidaceae(100);g__Bacteroides(100);g__Bacteroides_unclassified(100);.5	14.1877	-9.44684	3.08279	-3.06438	0.0021812	0.0196882
k__Bacteria(100);p__Bacteroidetes(100);p__Bacteroidetes_unclassified(100);p__Bacteroidetes_unclassified(100);p__Bacteroidetes_unclassified(100);p__Bacteroidetes_unclassified(100);p__Bacteroidetes_unclassified(100);.28	31.8503	-9.35299	1.56887	-5.96162	2.49754e-09	1.52295e-07
k__Bacteria(100);p__Bacteroidetes(100);p__Bacteroidetes_unclassified(100);p__Bacteroidetes_unclassified(100);p__Bacteroidetes_unclassified(100);p__Bacteroidetes_unclassified(100);p__Bacteroidetes_unclassified(100);.44	16.813	-9.31163	1.85698	-5.01438	5.3204e-07	1.77532e-05
k__Bacteria(100);k__Bacteria_unclassified(100);k__Bacteria_unclassified(100);k__Bacteria_unclassified(100);k__Bacteria_unclassified(100);k__Bacteria_unclassified(100);k__Bacteria_unclassified(100);.61	18.182	-9.2654	1.95657	-4.73554	2.1847e-06	6.18023e-05
k__Bacteria(100);k__Bacteria_unclassified(100);k__Bacteria_unclassified(100);k__Bacteria_unclassified(100);k__Bacteria_unclassified(100);k__Bacteria_unclassified(100);k__Bacteria_unclassified(100);.28	25.1435	-9.06978	1.65571	-5.4779	4.30409e-08	2.03628e-06
k__Bacteria(100);k__Bacteria_unclassified(100);k__Bacteria_unclassified(100);k__Bacteria_unclassified(100);k__Bacteria_unclassified(100);k__Bacteria_unclassified(100);k__Bacteria_unclassified(100);.58	11.6509	-9.06102	2.47446	-3.66182	0.000250431	0.00347062
k__Bacteria(100);p__Proteobacteria(100);c__Deltaproteobacteria(100);o__Desulfovibrionales(100);f__Desulfovibrionaceae(100);g__Desulfovibrio(100);g__Desulfovibrio_unclassified(78);	93.7149	-8.94776	0.969205	-9.23206	2.65487e-20	4.04721e-18
k__Bacteria(100);p__Proteobacteria(100);c__Deltaproteobacteria(100);o__Desulfovibrionales(100);f__Desulfovibrionaceae(100);g__Desulfovibrio(100);g__Desulfovibrio_unclassified(100);.16	16.8718	-8.77615	1.67604	-5.23624	1.6388e-07	6.51719e-06
k__Bacteria(100);p__Bacteroidetes(100);c__Bacteroidia(100);o__Bacteroidales(100);f__Porphyromonadaceae(100);g__Candidatus_Azobacteroides(100);g__Candidatus_Azobacteroides_unclassified(100);.34	11.2095	-8.75834	1.68863	-5.18664	2.14121e-07	8.27531e-06
k__Bacteria(100);p__Proteobacteria(100);p__Proteobacteria_unclassified(100);p__Proteobacteria_unclassified(100);p__Proteobacteria_unclassified(100);p__Proteobacteria_unclassified(100);p__Proteobacteria_unclassified(100);.15	11.2542	-8.60917	1.85609	-4.63833	3.51236e-06	9.44894e-05
k__Bacteria(100);p__Bacteroidetes(100);c__Bacteroidia(100);o__Bacteroidales(100);f__Rikenellaceae(100);f__Rikenellaceae_unclassified(100);f__Rikenellaceae_unclassified(100);.27	15.0511	-8.46256	1.2083	-7.00369	2.49305e-12	2.63112e-10
k__Bacteria(100);p__Bacteroidetes(100);c__Bacteroidia(100);o__Bacteroidales(100);o__Bacteroidales_unclassified(100);o__Bacteroidales_unclassified(100);o__Bacteroidales_unclassified(100);.18	30.6154	-8.45466	1.35436	-6.24254	4.30512e-10	3.02903e-08
k__Bacteria(100);p__Bacteroidetes(100);c__Bacteroidia(100);o__Bacteroidales(100);f__Porphyromonadaceae(100);f__Porphyromonadaceae_unclassified(79);f__Porphyromonadaceae_unclassified(79);	13.7958	-8.38556	1.31036	-6.39943	1.55959e-10	1.15662e-08
k__Bacteria(100);p__Bacteroidetes(100);c__Bacteroidia(100);o__Bacteroidales(100);f__Rikenellaceae(100);f__Rikenellaceae_unclassified(100);f__Rikenellaceae_unclassified(100);.38	12.1202	-8.15072	1.17768	-6.921	4.48452e-12	4.55761e-10
k__Bacteria(100);p__Bacteroidetes(100);p__Bacteroidetes_unclassified(100);p__Bacteroidetes_unclassified(100);p__Bacteroidetes_unclassified(100);p__Bacteroidetes_unclassified(100);p__Bacteroidetes_unclassified(100);.45	18.0156	-8.13233	1.52801	-5.32215	1.02546e-07	4.26344e-06
k__Bacteria(100);p__Bacteroidetes(100);c__Bacteroidia(100);o__Bacteroidales(100);f__Porphyromonadaceae(100);f__Porphyromonadaceae_unclassified(100);f__Porphyromonadaceae_unclassified(100);.21	13.5951	-8.06724	1.82286	-4.4256	9.61733e-06	0.000233454
k__Bacteria(100);p__Bacteroidetes(100);c__Bacteroidia(100);o__Bacteroidales(100);f__Porphyromonadaceae(100);g__Paludibacter(100);g__Paludibacter_unclassified(100);.14	15.4414	-7.97079	1.48913	-5.35265	8.66732e-08	3.71447e-06
k__Bacteria(100);p__Firmicutes(100);c__Clostridia(100);o__Clostridiales(100);f__Dehalobacteriaceae(100);g__Dehalobacterium(100);g__Dehalobacterium_unclassified(100);.3	13.6723	-7.96398	1.42844	-5.57531	2.47097e-08	1.23279e-06
k__Bacteria(100);p__Firmicutes(100);c__Clostridia(100);o__Clostridiales(100);o__Clostridiales_unclassified(100);o__Clostridiales_unclassified(100);o__Clostridiales_unclassified(100);.38	6.51767	-7.96217	2.14002	-3.72061	0.000198741	0.00281106
k__Bacteria(100);p__Bacteroidetes(100);c__Bacteroidia(100);o__Bacteroidales(100);f__Rikenellaceae(100);f__Rikenellaceae_unclassified(100);f__Rikenellaceae_unclassified(100);.51	7.1676	-7.86463	2.04451	-3.84671	0.000119716	0.00187715
k__Bacteria(100);p__Proteobacteria(100);c__Betaproteobacteria(100);o__Neisseriales(100);f__Neisseriaceae(100);f__Neisseriaceae_unclassified(100);f__Neisseriaceae_unclassified(100);	8.40198	-7.80293	2.4762	-3.15117	0.00162617	0.0154402
k__Bacteria(100);p__Proteobacteria(100);c__Deltaproteobacteria(100);o__Desulfovibrionales(100);f__Desulfovibrionaceae(100);g__Desulfovibrio(100);s__cuneatus(100);.6	9.93039	-7.67736	2.21571	-3.46496	0.000530311	0.00643217
k__Bacteria(100);p__Proteobacteria(100);p__Proteobacteria_unclassified(100);p__Proteobacteria_unclassified(100);p__Proteobacteria_unclassified(100);p__Proteobacteria_unclassified(100);p__Proteobacteria_unclassified(100);.25	14.3217	-7.63458	1.51029	-5.05503	4.3032e-07	1.476e-05
k__Bacteria(100);p__Proteobacteria(100);c__Alphaproteobacteria(100);o__RF32(100);o__RF32_unclassified(100);o__RF32_unclassified(100);o__RF32_unclassified(100);.15	5.16632	-7.52363	2.32266	-3.23924	0.0011985	0.0122712
k__Bacteria(100);k__Bacteria_unclassified(100);k__Bacteria_unclassified(100);k__Bacteria_unclassified(100);k__Bacteria_unclassified(100);k__Bacteria_unclassified(100);k__Bacteria_unclassified(100);.108	4.6022	-7.49282	2.46475	-3.03998	0.0023659	0.0210098
k__Bacteria(100);p__Bacteroidetes(100);c__Bacteroidia(100);o__Bacteroidales(100);f__Porphyromonadaceae(100);g__Dysgonomonas(100);g__Dysgonomonas_unclassified(100);.16	18.0343	-7.46018	1.71319	-4.35456	1.33331e-05	0.000304885
k__Bacteria(100);p__Verrucomicrobia(100);c__Opitutae(100);o__[Cerasicoccales](100);f__[Cerasicoccaceae](100);f__[Cerasicoccaceae]_unclassified(100);f__[Cerasicoccaceae]_unclassified(100);.2	10.6898	-7.44728	1.92026	-3.87825	0.000105208	0.00170824
k__Bacteria(100);p__Firmicutes(100);c__Clostridia(100);o__Clostridiales(100);f__Ruminococcaceae(100);f__Ruminococcaceae_unclassified(100);f__Ruminococcaceae_unclassified(100);.81	7.67285	-7.30918	1.93845	-3.77063	0.000162833	0.00244161
k__Bacteria(100);p__Bacteroidetes(100);c__Bacteroidia(100);o__Bacteroidales(100);f__Rikenellaceae(100);f__Rikenellaceae_unclassified(100);f__Rikenellaceae_unclassified(100);.19	18.7428	-7.23253	1.07928	-6.70123	2.06669e-11	1.77219e-09
k__Bacteria(100);p__Bacteroidetes(100);c__Bacteroidia(100);o__Bacteroidales(100);f__Porphyromonadaceae(100);g__Candidatus_Azobacteroides(100);g__Candidatus_Azobacteroides_unclassified(100);.46	4.43214	-7.15301	1.96292	-3.64407	0.000268365	0.00362756
k__Bacteria(100);p__Firmicutes(100);c__Clostridia(100);o__Clostridiales(100);f__Ruminococcaceae(100);f__Ruminococcaceae_unclassified(100);f__Ruminococcaceae_unclassified(100);.50	12.4855	-7.14268	2.00417	-3.56391	0.000365377	0.00470702
k__Bacteria(100);p__Proteobacteria(100);c__Epsilonproteobacteria(100);o__Campylobacterales(100);f__Campylobacteraceae(100);g__Arcobacter(100);s__cryaerophilus(100);	53.518	-7.13215	1.81494	-3.92969	8.5056e-05	0.00142313
k__Bacteria(100);p__Proteobacteria(100);c__Alphaproteobacteria(100);c__Alphaproteobacteria_unclassified(100);c__Alphaproteobacteria_unclassified(100);c__Alphaproteobacteria_unclassified(100);c__Alphaproteobacteria_unclassified(100);.1	12.2114	-7.12044	1.53415	-4.6413	3.46229e-06	9.40647e-05
k__Bacteria(100);p__Proteobacteria(100);c__Gammaproteobacteria(100);o__Enterobacteriales(100);f__Enterobacteriaceae(100);f__Enterobacteriaceae_unclassified(93);f__Enterobacteriaceae_unclassified(93);	227.001	-7.07253	1.34601	-5.25443	1.48485e-07	5.99181e-06
k__Bacteria(100);p__Firmicutes(100);p__Firmicutes_unclassified(100);p__Firmicutes_unclassified(100);p__Firmicutes_unclassified(100);p__Firmicutes_unclassified(100);p__Firmicutes_unclassified(100);.22	13.289	-6.9474	1.59638	-4.35197	1.34919e-05	0.000305964
k__Bacteria(100);p__Firmicutes(100);c__Bacilli(100);o__Lactobacillales(100);f__Lactobacillaceae(100);g__Lactobacillus(99);g__Lactobacillus_unclassified(99);	6.39583	-6.94567	1.93531	-3.58892	0.000332052	0.00433881
k__Bacteria(100);p__Bacteroidetes(100);c__Bacteroidia(100);o__Bacteroidales(100);f__Rikenellaceae(100);f__Rikenellaceae_unclassified(100);f__Rikenellaceae_unclassified(100);.48	8.1712	-6.91198	1.69505	-4.07775	4.5473e-05	0.000837569
k__Bacteria(100);p__Firmicutes(100);c__Clostridia(100);o__Clostridiales(100);o__Clostridiales_unclassified(100);o__Clostridiales_unclassified(100);o__Clostridiales_unclassified(100);.35	5.7395	-6.90497	1.42383	-4.84957	1.23728e-06	3.73088e-05
k__Bacteria(100);p__Bacteroidetes(100);c__Bacteroidia(100);o__Bacteroidales(100);f__Porphyromonadaceae(100);g__Dysgonomonas(100);g__Dysgonomonas_unclassified(100);.10	31.5079	-6.88139	1.30589	-5.2695	1.36795e-07	5.60246e-06
k__Bacteria(100);p__Bacteroidetes(100);p__Bacteroidetes_unclassified(100);p__Bacteroidetes_unclassified(100);p__Bacteroidetes_unclassified(100);p__Bacteroidetes_unclassified(100);p__Bacteroidetes_unclassified(100);.79	2.65065	-6.84717	2.06308	-3.3189	0.000903722	0.00991925
k__Bacteria(100);p__Bacteroidetes(100);c__Bacteroidia(100);o__Bacteroidales(100);o__Bacteroidales_unclassified(100);o__Bacteroidales_unclassified(100);o__Bacteroidales_unclassified(100);.65	3.43904	-6.82928	1.88053	-3.63157	0.000281707	0.00377075
k__Bacteria(100);k__Bacteria_unclassified(100);k__Bacteria_unclassified(100);k__Bacteria_unclassified(100);k__Bacteria_unclassified(100);k__Bacteria_unclassified(100);k__Bacteria_unclassified(100);.126	4.97391	-6.77448	1.45617	-4.65225	3.28326e-06	9.00926e-05
k__Bacteria(100);k__Bacteria_unclassified(100);k__Bacteria_unclassified(100);k__Bacteria_unclassified(100);k__Bacteria_unclassified(100);k__Bacteria_unclassified(100);k__Bacteria_unclassified(100);.111	5.24978	-6.7587	1.54927	-4.36249	1.28589e-05	0.000299023
k__Bacteria(100);p__Bacteroidetes(100);p__Bacteroidetes_unclassified(100);p__Bacteroidetes_unclassified(100);p__Bacteroidetes_unclassified(100);p__Bacteroidetes_unclassified(100);p__Bacteroidetes_unclassified(100);.34	14.2185	-6.74721	1.76198	-3.82933	0.000128493	0.001992
k__Bacteria(100);p__Bacteroidetes(100);p__Bacteroidetes_unclassified(100);p__Bacteroidetes_unclassified(100);p__Bacteroidetes_unclassified(100);p__Bacteroidetes_unclassified(100);p__Bacteroidetes_unclassified(100);.39	10.3358	-6.67824	1.7072	-3.91181	9.16072e-05	0.00151428
k__Bacteria(100);p__Proteobacteria(100);c__Alphaproteobacteria(100);o__RF32(100);o__RF32_unclassified(100);o__RF32_unclassified(100);o__RF32_unclassified(100);.6	11.6958	-6.63068	1.9371	-3.42299	0.000619364	0.00722375
k__Bacteria(100);p__Proteobacteria(100);c__Deltaproteobacteria(100);c__Deltaproteobacteria_unclassified(71);c__Deltaproteobacteria_unclassified(71);c__Deltaproteobacteria_unclassified(71);c__Deltaproteobacteria_unclassified(71);	5.58103	-6.59258	1.54987	-4.25362	2.10339e-05	0.000437249
k__Bacteria(100);p__Firmicutes(100);c__Erysipelotrichi(100);o__Erysipelotrichales(100);f__Erysipelotrichaceae(100);g__Clostridium(100);g__Clostridium_unclassified(100);.2	8.34575	-6.58688	2.21412	-2.97494	0.00293048	0.0249728
k__Bacteria(100);p__Bacteroidetes(100);c__Bacteroidia(100);o__Bacteroidales(100);f__Porphyromonadaceae(100);g__Candidatus_Azobacteroides(100);g__Candidatus_Azobacteroides_unclassified(100);.22	20.1547	-6.52282	1.07154	-6.08734	1.14802e-09	7.32597e-08
k__Bacteria(100);p__Bacteroidetes(100);c__Bacteroidia(100);o__Bacteroidales(100);f__Bacteroidaceae(100);g__Bacteroides(100);g__Bacteroides_unclassified(100);.3	24.6158	-6.4929	1.53397	-4.23274	2.30857e-05	0.000476295
k__Bacteria(100);p__Bacteroidetes(100);c__Bacteroidia(100);o__Bacteroidales(100);f__Porphyromonadaceae(100);f__Porphyromonadaceae_unclassified(84);f__Porphyromonadaceae_unclassified(84);	4.81921	-6.48616	1.91324	-3.39015	0.000698549	0.00798675
k__Bacteria(100);k__Bacteria_unclassified(100);k__Bacteria_unclassified(100);k__Bacteria_unclassified(100);k__Bacteria_unclassified(100);k__Bacteria_unclassified(100);k__Bacteria_unclassified(100);.123	3.81439	-6.47643	1.25698	-5.15235	2.57239e-07	9.80366e-06
k__Bacteria(100);p__Firmicutes(100);c__Clostridia(100);o__Clostridiales(100);o__Clostridiales_unclassified(79);o__Clostridiales_unclassified(79);o__Clostridiales_unclassified(79);	7.80624	-6.42466	1.41856	-4.52901	5.926e-06	0.000149183
k__Bacteria(100);p__Firmicutes(100);c__Clostridia(100);o__Clostridiales(100);f__Lachnospiraceae(100);g__Clostridium(100);s__colinum(58);	6.84055	-6.40975	1.77982	-3.60135	0.000316568	0.00415628
k__Bacteria(100);p__Bacteroidetes(100);c__Bacteroidia(100);o__Bacteroidales(100);f__Porphyromonadaceae(100);g__Parabacteroides(98);g__Parabacteroides_unclassified(98);	5.18508	-6.33266	1.67396	-3.78304	0.000154923	0.00236172
k__Bacteria(100);p__Bacteroidetes(100);c__Bacteroidia(100);o__Bacteroidales(100);f__Rikenellaceae(100);f__Rikenellaceae_unclassified(100);f__Rikenellaceae_unclassified(100);.47	7.0039	-6.28952	1.29577	-4.85389	1.21064e-06	3.69853e-05
k__Bacteria(100);p__Firmicutes(100);c__Clostridia(100);o__Clostridiales(100);o__Clostridiales_unclassified(99);o__Clostridiales_unclassified(99);o__Clostridiales_unclassified(99);.2	5.357	-6.2409	1.71548	-3.63799	0.000274771	0.00369595
k__Bacteria(100);p__Bacteroidetes(100);c__Bacteroidia(100);o__Bacteroidales(100);f__Rikenellaceae(100);f__Rikenellaceae_unclassified(100);f__Rikenellaceae_unclassified(100);.45	6.68689	-6.24028	1.8142	-3.43969	0.000582372	0.00688805
k__Bacteria(100);p__Firmicutes(100);c__Clostridia(100);o__Clostridiales(100);o__Clostridiales_unclassified(99);o__Clostridiales_unclassified(99);o__Clostridiales_unclassified(99);.4	4.41643	-6.1895	1.99432	-3.10356	0.00191205	0.0176655
k__Bacteria(100);p__Bacteroidetes(100);p__Bacteroidetes_unclassified(100);p__Bacteroidetes_unclassified(100);p__Bacteroidetes_unclassified(100);p__Bacteroidetes_unclassified(100);p__Bacteroidetes_unclassified(100);.20	34.7814	-6.15559	1.20009	-5.12925	2.90897e-07	1.0643e-05
k__Bacteria(100);p__Firmicutes(100);p__Firmicutes_unclassified(100);p__Firmicutes_unclassified(100);p__Firmicutes_unclassified(100);p__Firmicutes_unclassified(100);p__Firmicutes_unclassified(100);.63	5.45142	-6.10156	2.24084	-2.7229	0.00647125	0.0479922
k__Bacteria(100);p__Bacteroidetes(100);c__Bacteroidia(100);o__Bacteroidales(100);f__Rikenellaceae(100);f__Rikenellaceae_unclassified(100);f__Rikenellaceae_unclassified(100);.79	2.30071	-6.02053	1.44547	-4.16511	3.112e-05	0.000623309
k__Bacteria(100);p__Bacteroidetes(100);c__Bacteroidia(100);o__Bacteroidales(100);f__Porphyromonadaceae(100);g__Paludibacter(100);g__Paludibacter_unclassified(100);.6	47.2168	-5.98111	1.45462	-4.11179	3.92598e-05	0.000753348
k__Bacteria(100);p__Lentisphaerae(100);c__[Lentisphaeria](100);o__Victivallales(100);f__Victivallaceae(100);f__Victivallaceae_unclassified(100);f__Victivallaceae_unclassified(100);.3	13.4999	-5.9506	1.28504	-4.63068	3.6447e-06	9.70976e-05
k__Bacteria(100);p__Lentisphaerae(100);c__[Lentisphaeria](100);o__Victivallales(100);f__Victivallaceae(100);f__Victivallaceae_unclassified(100);f__Victivallaceae_unclassified(100);.7	6.88071	-5.88764	1.64559	-3.57782	0.000346467	0.00450571
k__Bacteria(100);p__Firmicutes(100);p__Firmicutes_unclassified(100);p__Firmicutes_unclassified(100);p__Firmicutes_unclassified(100);p__Firmicutes_unclassified(100);p__Firmicutes_unclassified(100);.40	6.98172	-5.87715	1.60716	-3.65685	0.000255337	0.00352082
k__Bacteria(100);p__Firmicutes(100);c__Bacilli(100);o__Lactobacillales(100);f__Streptococcaceae(100);g__Lactococcus(100);g__Lactococcus_unclassified(100);	9.61466	-5.84961	1.5206	-3.84692	0.000119611	0.00187715
k__Bacteria(100);k__Bacteria_unclassified(100);k__Bacteria_unclassified(100);k__Bacteria_unclassified(100);k__Bacteria_unclassified(100);k__Bacteria_unclassified(100);k__Bacteria_unclassified(100);.120	3.97813	-5.84187	1.38265	-4.22513	2.38802e-05	0.000485387
k__Bacteria(100);p__Proteobacteria(100);c__Alphaproteobacteria(100);o__RF32(100);o__RF32_unclassified(100);o__RF32_unclassified(100);o__RF32_unclassified(100);.5	7.55981	-5.84038	1.39694	-4.18085	2.90418e-05	0.000585961
k__Bacteria(100);p__Spirochaetes(100);c__Spirochaetes(100);o__Spirochaetales(100);f__Spirochaetaceae(100);g__Treponema(100);g__Treponema_unclassified(100);.2	9.45792	-5.81807	1.55894	-3.73208	0.000189906	0.00272828
k__Bacteria(100);p__Bacteroidetes(100);c__Bacteroidia(100);o__Bacteroidales(100);o__Bacteroidales_unclassified(100);o__Bacteroidales_unclassified(100);o__Bacteroidales_unclassified(100);.54	3.52197	-5.74227	1.84287	-3.11593	0.00183365	0.0169984
k__Bacteria(100);p__Firmicutes(100);c__Clostridia(100);o__Clostridiales(100);f__Lachnospiraceae(100);f__Lachnospiraceae_unclassified(100);f__Lachnospiraceae_unclassified(100);.21	18.4164	-5.72934	1.70281	-3.36464	0.000766445	0.00861936
k__Bacteria(100);k__Bacteria_unclassified(100);k__Bacteria_unclassified(100);k__Bacteria_unclassified(100);k__Bacteria_unclassified(100);k__Bacteria_unclassified(100);k__Bacteria_unclassified(100);.145	2.09768	-5.71328	1.12306	-5.08723	3.63333e-07	1.31183e-05
k__Bacteria(100);p__Bacteroidetes(100);c__Bacteroidia(100);o__Bacteroidales(100);f__Porphyromonadaceae(100);f__Porphyromonadaceae_unclassified(100);f__Porphyromonadaceae_unclassified(100);.17	9.94127	-5.71194	1.66911	-3.42215	0.000621285	0.00722375
k__Bacteria(100);p__Elusimicrobia(100);c__Endomicrobia(100);c__Endomicrobia_unclassified(100);c__Endomicrobia_unclassified(100);c__Endomicrobia_unclassified(100);c__Endomicrobia_unclassified(100);.10	2.12682	-5.66592	1.60551	-3.52904	0.000417071	0.00527393
k__Bacteria(100);p__Proteobacteria(100);c__Gammaproteobacteria(100);o__Pseudomonadales(100);f__Pseudomonadaceae(100);g__Pseudomonas(75);g__Pseudomonas_unclassified(65);	27.7795	-5.6657	1.38877	-4.07967	4.51006e-05	0.000837569
k__Bacteria(100);p__Firmicutes(100);p__Firmicutes_unclassified(100);p__Firmicutes_unclassified(100);p__Firmicutes_unclassified(100);p__Firmicutes_unclassified(100);p__Firmicutes_unclassified(100);.5	57.8456	-5.64824	0.856615	-6.59367	4.29077e-11	3.46291e-09
k__Bacteria(100);p__Firmicutes(100);c__Clostridia(100);o__Clostridiales(100);f__Lachnospiraceae(100);f__Lachnospiraceae_unclassified(100);f__Lachnospiraceae_unclassified(100);.29	12.2453	-5.58272	1.71089	-3.26305	0.00110221	0.0117227
k__Bacteria(100);p__Firmicutes(100);p__Firmicutes_unclassified(100);p__Firmicutes_unclassified(100);p__Firmicutes_unclassified(100);p__Firmicutes_unclassified(100);p__Firmicutes_unclassified(100);.61	2.88643	-5.57928	1.56856	-3.55694	0.0003752	0.00480501
k__Bacteria(100);p__Firmicutes(100);c__Clostridia(100);o__Clostridiales(100);f__Christensenellaceae(100);f__Christensenellaceae_unclassified(100);f__Christensenellaceae_unclassified(100);.8	6.41262	-5.56957	1.74288	-3.19561	0.00139533	0.0138224
k__Bacteria(100);p__Bacteroidetes(100);c__Bacteroidia(100);o__Bacteroidales(100);f__Porphyromonadaceae(100);g__Dysgonomonas(100);s__gadei(57);	17.0858	-5.53313	1.69757	-3.25944	0.00111631	0.0118112
k__Bacteria(100);p__Firmicutes(100);p__Firmicutes_unclassified(100);p__Firmicutes_unclassified(100);p__Firmicutes_unclassified(100);p__Firmicutes_unclassified(100);p__Firmicutes_unclassified(100);.71	2.34385	-5.49521	1.84532	-2.97791	0.00290218	0.0248087
k__Bacteria(100);p__Bacteroidetes(100);c__Bacteroidia(100);o__Bacteroidales(100);f__Porphyromonadaceae(100);g__Paludibacter(100);g__Paludibacter_unclassified(100);.19	5.90088	-5.48392	1.47243	-3.7244	0.000195783	0.00278356
k__Bacteria(100);p__Firmicutes(100);c__Clostridia(100);o__Clostridiales(100);f__Ruminococcaceae(98);f__Ruminococcaceae_unclassified(98);f__Ruminococcaceae_unclassified(98);.1	3.60934	-5.4793	1.50179	-3.64852	0.00026376	0.00358295
k__Bacteria(100);p__Firmicutes(100);c__Clostridia(100);o__Clostridiales(100);f__Ruminococcaceae(100);f__Ruminococcaceae_unclassified(100);f__Ruminococcaceae_unclassified(100);.115	2.81789	-5.47222	1.72008	-3.18137	0.00146579	0.0142834
k__Bacteria(100);k__Bacteria_unclassified(100);k__Bacteria_unclassified(100);k__Bacteria_unclassified(100);k__Bacteria_unclassified(100);k__Bacteria_unclassified(100);k__Bacteria_unclassified(100);.23	26.6933	-5.43773	1.16711	-4.65914	3.17537e-06	8.80122e-05
k__Bacteria(100);p__Planctomycetes(100);c__vadinHA49(100);o__PeHg47(100);o__PeHg47_unclassified(100);o__PeHg47_unclassified(100);o__PeHg47_unclassified(100);.9	7.43168	-5.30883	1.03188	-5.14483	2.67765e-07	1.00469e-05
k__Bacteria(100);k__Bacteria_unclassified(100);k__Bacteria_unclassified(100);k__Bacteria_unclassified(100);k__Bacteria_unclassified(100);k__Bacteria_unclassified(100);k__Bacteria_unclassified(100);.138	2.74729	-5.23755	1.21338	-4.31651	1.58516e-05	0.000347974
k__Bacteria(100);p__Bacteroidetes(100);c__Bacteroidia(100);o__Bacteroidales(100);o__Bacteroidales_unclassified(100);o__Bacteroidales_unclassified(100);o__Bacteroidales_unclassified(100);	468.77	-5.2158	1.51397	-3.44512	0.000570801	0.00683964
k__Bacteria(100);p__Bacteroidetes(100);p__Bacteroidetes_unclassified(100);p__Bacteroidetes_unclassified(100);p__Bacteroidetes_unclassified(100);p__Bacteroidetes_unclassified(100);p__Bacteroidetes_unclassified(100);.22	31.027	-5.18381	1.3503	-3.839	0.000123537	0.00192606
k__Bacteria(100);p__Bacteroidetes(100);c__Bacteroidia(100);o__Bacteroidales(100);f__Porphyromonadaceae(100);g__Paludibacter(100);g__Paludibacter_unclassified(100);.18	7.06688	-5.17737	1.26458	-4.09415	4.23717e-05	0.000801848
k__Bacteria(100);p__Bacteroidetes(100);c__Bacteroidia(100);o__Bacteroidales(100);f__Porphyromonadaceae(100);g__Paludibacter(100);g__Paludibacter_unclassified(100);.8	22.2992	-5.17012	1.29001	-4.00782	6.12808e-05	0.00106434
k__Bacteria(100);k__Bacteria_unclassified(100);k__Bacteria_unclassified(100);k__Bacteria_unclassified(100);k__Bacteria_unclassified(100);k__Bacteria_unclassified(100);k__Bacteria_unclassified(100);.135	3.07935	-5.09022	1.2266	-4.14985	3.32695e-05	0.000647458
k__Bacteria(100);k__Bacteria_unclassified(100);k__Bacteria_unclassified(100);k__Bacteria_unclassified(100);k__Bacteria_unclassified(100);k__Bacteria_unclassified(100);k__Bacteria_unclassified(100);.62	10.6861	-5.08682	1.17726	-4.32089	1.55403e-05	0.000343891
k__Bacteria(100);p__Fibrobacteres(100);c__TG3(100);o__TG3-2(100);f__M2PB4-14(100);f__M2PB4-14_unclassified(100);f__M2PB4-14_unclassified(100);	78.0373	-5.06657	1.602	-3.16265	0.00156342	0.0149479
k__Bacteria(100);p__Bacteroidetes(100);c__Bacteroidia(100);o__Bacteroidales(100);f__Rikenellaceae(100);f__Rikenellaceae_unclassified(100);f__Rikenellaceae_unclassified(100);.72	2.97692	-5.03778	1.55184	-3.24633	0.00116902	0.0120593
k__Bacteria(100);p__Bacteroidetes(100);c__Bacteroidia(100);o__Bacteroidales(100);f__Porphyromonadaceae(100);g__Dysgonomonas(100);g__Dysgonomonas_unclassified(86);	32.8298	-5.02712	1.10121	-4.56509	4.99275e-06	0.000126853
k__Bacteria(100);p__Firmicutes(100);c__Clostridia(100);o__Clostridiales(100);f__Ruminococcaceae(100);g__Ruminococcus(82);g__Ruminococcus_unclassified(82);	2.58629	-4.98482	1.48592	-3.35471	0.000794492	0.00886214
k__Bacteria(100);k__Bacteria_unclassified(100);k__Bacteria_unclassified(100);k__Bacteria_unclassified(100);k__Bacteria_unclassified(100);k__Bacteria_unclassified(100);k__Bacteria_unclassified(100);.27	12.3944	-4.96854	0.804349	-6.17709	6.52921e-10	4.47904e-08
k__Bacteria(100);k__Bacteria_unclassified(100);k__Bacteria_unclassified(100);k__Bacteria_unclassified(100);k__Bacteria_unclassified(100);k__Bacteria_unclassified(100);k__Bacteria_unclassified(100);.132	3.43448	-4.90565	1.393	-3.52164	0.000428878	0.00539836
k__Bacteria(100);p__Bacteroidetes(100);p__Bacteroidetes_unclassified(100);p__Bacteroidetes_unclassified(100);p__Bacteroidetes_unclassified(100);p__Bacteroidetes_unclassified(100);p__Bacteroidetes_unclassified(100);.27	27.2356	-4.88905	0.913853	-5.34993	8.79885e-08	3.71447e-06
k__Bacteria(100);p__Bacteroidetes(100);c__Bacteroidia(100);o__Bacteroidales(100);f__Rikenellaceae(100);f__Rikenellaceae_unclassified(100);f__Rikenellaceae_unclassified(100);.22	15.1424	-4.86029	1.12705	-4.31241	1.61483e-05	0.000351675
k__Bacteria(100);p__Firmicutes(100);c__Clostridia(100);o__Clostridiales(100);f__Ruminococcaceae(100);g__Ruminococcus(99);g__Ruminococcus_unclassified(99);.3	3.16235	-4.75996	1.15221	-4.13115	3.60954e-05	0.000697506
k__Bacteria(100);p__Firmicutes(100);c__Clostridia(100);o__Clostridiales(100);o__Clostridiales_unclassified(100);o__Clostridiales_unclassified(100);o__Clostridiales_unclassified(100);.44	5.22318	-4.7316	1.51745	-3.11813	0.00182001	0.0169292
k__Bacteria(100);p__Planctomycetes(100);c__Planctomycetia(100);o__Pirellulales(100);f__Pirellulaceae(100);f__Pirellulaceae_unclassified(100);f__Pirellulaceae_unclassified(100);.20	4.3396	-4.70168	1.41735	-3.31722	0.000909171	0.00993931
k__Bacteria(100);p__Firmicutes(100);c__Clostridia(100);o__Clostridiales(100);f__Ruminococcaceae(99);f__Ruminococcaceae_unclassified(99);f__Ruminococcaceae_unclassified(99);.3	2.59108	-4.63308	1.24222	-3.72968	0.000191724	0.00274006
k__Bacteria(100);p__Firmicutes(100);c__Clostridia(100);o__Clostridiales(100);f__Veillonellaceae(100);f__Veillonellaceae_unclassified(100);f__Veillonellaceae_unclassified(100);.3	13.2628	-4.49059	0.781297	-5.7476	9.05167e-09	4.7765e-07
k__Bacteria(100);p__Firmicutes(100);c__Clostridia(100);o__Clostridiales(100);f__Ruminococcaceae(100);g__Ruminococcus(100);g__Ruminococcus_unclassified(100);.3	48.0348	-4.48128	0.906234	-4.94495	7.61643e-07	2.43017e-05
k__Bacteria(100);k__Bacteria_unclassified(100);k__Bacteria_unclassified(100);k__Bacteria_unclassified(100);k__Bacteria_unclassified(100);k__Bacteria_unclassified(100);k__Bacteria_unclassified(100);.90	6.92595	-4.42272	1.51215	-2.92478	0.00344697	0.029103
k__Bacteria(100);k__Bacteria_unclassified(100);k__Bacteria_unclassified(100);k__Bacteria_unclassified(100);k__Bacteria_unclassified(100);k__Bacteria_unclassified(100);k__Bacteria_unclassified(100);.128	4.07252	-4.36902	1.46306	-2.98622	0.00282446	0.0243374
k__Bacteria(100);p__Firmicutes(100);c__Clostridia(100);o__Clostridiales(100);f__Lachnospiraceae(100);g__Clostridium(100);s__colinum(98);	2.69736	-4.35567	1.58525	-2.74762	0.00600303	0.0455036
k__Bacteria(100);k__Bacteria_unclassified(100);k__Bacteria_unclassified(100);k__Bacteria_unclassified(100);k__Bacteria_unclassified(100);k__Bacteria_unclassified(100);k__Bacteria_unclassified(100);.71	7.27864	-4.1826	1.19575	-3.49788	0.000468965	0.00579657
k__Bacteria(100);k__Bacteria_unclassified(100);k__Bacteria_unclassified(100);k__Bacteria_unclassified(100);k__Bacteria_unclassified(100);k__Bacteria_unclassified(100);k__Bacteria_unclassified(100);.133	2.82961	-4.1626	1.04002	-4.00243	6.26959e-05	0.001082
k__Bacteria(100);p__Proteobacteria(100);c__Alphaproteobacteria(100);o__Rickettsiales(100);f__Pelagibacteraceae(100);f__Pelagibacteraceae_unclassified(100);f__Pelagibacteraceae_unclassified(100);.1	1.29629	-4.15991	1.00184	-4.15229	3.29169e-05	0.000645171
k__Bacteria(100);p__Firmicutes(100);c__Clostridia(100);o__Clostridiales(100);f__Ruminococcaceae(100);f__Ruminococcaceae_unclassified(100);f__Ruminococcaceae_unclassified(100);.8	61.3393	-4.11593	1.47505	-2.79036	0.00526496	0.0406959
k__Bacteria(100);p__Proteobacteria(100);c__Alphaproteobacteria(100);o__Rickettsiales(100);f__Pelagibacteraceae(100);f__Pelagibacteraceae_unclassified(100);f__Pelagibacteraceae_unclassified(100);	3.25857	-4.00682	0.892011	-4.49189	7.05935e-06	0.000176099
k__Bacteria(100);p__Proteobacteria(100);p__Proteobacteria_unclassified(100);p__Proteobacteria_unclassified(100);p__Proteobacteria_unclassified(100);p__Proteobacteria_unclassified(100);p__Proteobacteria_unclassified(100);.19	7.28998	-3.96519	1.20304	-3.29597	0.000980842	0.0105546
k__Bacteria(100);p__Proteobacteria(100);c__Deltaproteobacteria(100);o__Desulfovibrionales(100);o__Desulfovibrionales_unclassified(99);o__Desulfovibrionales_unclassified(99);o__Desulfovibrionales_unclassified(99);	3.51748	-3.90807	1.42411	-2.74423	0.00606537	0.0457236
k__Bacteria(100);p__Cyanobacteria(100);c__4C0d-2(100);o__YS2(100);o__YS2_unclassified(100);o__YS2_unclassified(100);o__YS2_unclassified(100);.3	2.72355	-3.89268	1.34588	-2.8923	0.00382437	0.0316087
k__Bacteria(100);p__Actinobacteria(100);c__Acidimicrobiia(100);o__Acidimicrobiales(100);f__OCS155(100);f__OCS155_unclassified(100);f__OCS155_unclassified(100);	2.01936	-3.83931	1.09997	-3.4904	0.000482307	0.00590826
k__Bacteria(100);p__Bacteroidetes(100);c__Bacteroidia(100);o__Bacteroidales(100);f__Rikenellaceae(100);f__Rikenellaceae_unclassified(100);f__Rikenellaceae_unclassified(100);.42	7.40372	-3.82648	1.25067	-3.05954	0.00221679	0.0198787
k__Bacteria(100);p__Bacteroidetes(100);p__Bacteroidetes_unclassified(100);p__Bacteroidetes_unclassified(100);p__Bacteroidetes_unclassified(100);p__Bacteroidetes_unclassified(100);p__Bacteroidetes_unclassified(100);.16	100.179	-3.75235	0.788778	-4.75717	1.96323e-06	5.61155e-05
k__Bacteria(100);p__Planctomycetes(100);c__Planctomycetia(100);o__Pirellulales(100);f__Pirellulaceae(100);f__Pirellulaceae_unclassified(100);f__Pirellulaceae_unclassified(100);.7	16.2167	-3.61683	0.965809	-3.74487	0.000180485	0.00262037
k__Bacteria(100);k__Bacteria_unclassified(100);k__Bacteria_unclassified(100);k__Bacteria_unclassified(100);k__Bacteria_unclassified(100);k__Bacteria_unclassified(100);k__Bacteria_unclassified(100);.59	9.26094	-3.60524	0.74621	-4.8314	1.35573e-06	4.04362e-05
k__Bacteria(100);p__Firmicutes(100);c__Clostridia(100);o__Clostridiales(100);f__Dehalobacteriaceae(98);g__Dehalobacterium(98);g__Dehalobacterium_unclassified(98);	13.4663	-3.48114	0.823448	-4.22751	2.3629e-05	0.000483865
k__Bacteria(100);p__Firmicutes(100);c__Clostridia(100);o__Clostridiales(100);o__Clostridiales_unclassified(57);o__Clostridiales_unclassified(57);o__Clostridiales_unclassified(57);	2.4822	-3.18949	0.95819	-3.32866	0.000872637	0.0096553
k__Bacteria(100);k__Bacteria_unclassified(100);k__Bacteria_unclassified(100);k__Bacteria_unclassified(100);k__Bacteria_unclassified(100);k__Bacteria_unclassified(100);k__Bacteria_unclassified(100);.54	10.0603	-3.17926	0.985867	-3.22484	0.00126044	0.0128098
k__Bacteria(100);p__Proteobacteria(100);c__Deltaproteobacteria(100);o__Desulfovibrionales(100);f__Desulfovibrionaceae(100);g__Desulfovibrio(100);g__Desulfovibrio_unclassified(61);.1	1.25114	-3.17882	1.1607	-2.7387	0.00616823	0.0461188
k__Bacteria(100);p__Proteobacteria(100);c__Deltaproteobacteria(100);o__Desulfovibrionales(100);f__Desulfovibrionaceae(100);f__Desulfovibrionaceae_unclassified(67);f__Desulfovibrionaceae_unclassified(67);	30.084	-3.15318	0.837352	-3.76565	0.000166114	0.00246387
k__Bacteria(100);p__Firmicutes(100);c__Clostridia(100);c__Clostridia_unclassified(100);c__Clostridia_unclassified(100);c__Clostridia_unclassified(100);c__Clostridia_unclassified(100);.5	2.43955	-3.00785	1.08134	-2.78159	0.00540941	0.0414621
k__Bacteria(100);p__Proteobacteria(100);c__Deltaproteobacteria(100);o__Desulfarculales(100);f__Desulfarculaceae(100);f__Desulfarculaceae_unclassified(100);f__Desulfarculaceae_unclassified(100);.1	14.6684	-2.841	0.894597	-3.17574	0.00149456	0.0144404
k__Bacteria(100);p__Firmicutes(100);c__Clostridia(100);o__Clostridiales(100);o__Clostridiales_unclassified(100);o__Clostridiales_unclassified(100);o__Clostridiales_unclassified(100);.37	4.60933	-2.81468	0.79152	-3.55604	0.000376486	0.00480501
k__Bacteria(100);p__Proteobacteria(100);c__Betaproteobacteria(100);o__Nitrosomonadales(100);f__Nitrosomonadaceae(100);f__Nitrosomonadaceae_unclassified(95);f__Nitrosomonadaceae_unclassified(95);	4.86469	-2.76069	0.735616	-3.7529	0.000174801	0.00255135
k__Bacteria(100);p__Planctomycetes(100);c__Planctomycetia(100);o__Pirellulales(100);f__Pirellulaceae(100);f__Pirellulaceae_unclassified(100);f__Pirellulaceae_unclassified(100);.8	12.3144	-2.6391	0.765046	-3.44959	0.000561432	0.00675688
k__Bacteria(100);k__Bacteria_unclassified(100);k__Bacteria_unclassified(100);k__Bacteria_unclassified(100);k__Bacteria_unclassified(100);k__Bacteria_unclassified(100);k__Bacteria_unclassified(100);.42	12.8417	-2.62619	0.829827	-3.16474	0.00155222	0.0148926
k__Bacteria(100);p__Tenericutes(100);c__Mollicutes(100);o__RF39(100);o__RF39_unclassified(100);o__RF39_unclassified(100);o__RF39_unclassified(100);.5	9.39401	-2.48733	0.833347	-2.98474	0.00283818	0.0243374
k__Bacteria(100);p__Bacteroidetes(100);c__Bacteroidia(100);o__Bacteroidales(100);f__Porphyromonadaceae(100);f__Porphyromonadaceae_unclassified(87);f__Porphyromonadaceae_unclassified(87);	19.7643	-2.45941	0.795375	-3.09214	0.00198717	0.0181156
k__Bacteria(100);p__Tenericutes(100);c__Mollicutes(100);o__RsaHF231(100);o__RsaHF231_unclassified(100);o__RsaHF231_unclassified(100);o__RsaHF231_unclassified(100);.1	33.7571	-2.37089	0.794215	-2.9852	0.00283393	0.0243374
k__Bacteria(100);p__Proteobacteria(100);c__Deltaproteobacteria(100);o__Desulfovibrionales(100);f__Desulfovibrionaceae(100);g__Desulfovibrio(100);s__cuneatus(76);	151.547	-2.23435	0.702414	-3.18096	0.0014679	0.0142834
k__Bacteria(100);p__Bacteroidetes(100);c__Bacteroidia(100);o__Bacteroidales(100);f__Rikenellaceae(100);g__Alistipes(70);s__indistinctus(70);	19.7636	-2.15699	0.712249	-3.02842	0.00245835	0.0216208
k__Bacteria(100);p__Firmicutes(100);c__Clostridia(100);o__Clostridiales(100);f__Christensenellaceae(98);f__Christensenellaceae_unclassified(98);f__Christensenellaceae_unclassified(98);	15.8005	-2.05443	0.648634	-3.16732	0.00153849	0.0148126
k__Bacteria(100);p__Bacteroidetes(100);c__Bacteroidia(100);o__Bacteroidales(100);f__Rikenellaceae(100);f__Rikenellaceae_unclassified(100);f__Rikenellaceae_unclassified(100);.5	101.513	-2.02527	0.723214	-2.80038	0.00510426	0.0396805
k__Bacteria(100);p__Bacteroidetes(100);c__Bacteroidia(100);o__Bacteroidales(100);f__Porphyromonadaceae(100);f__Porphyromonadaceae_unclassified(100);f__Porphyromonadaceae_unclassified(100);.6	56.0357	-1.94351	0.556092	-3.49494	0.000474165	0.00583457
k__Bacteria(100);p__Firmicutes(100);c__Clostridia(100);o__Clostridiales(100);f__Ruminococcaceae(100);f__Ruminococcaceae_unclassified(100);f__Ruminococcaceae_unclassified(100);.51	9.26014	-1.28607	0.428076	-3.0043	0.00266189	0.0232619
k__Bacteria(100);p__Planctomycetes(100);c__vadinHA49(100);o__PeHg47(100);o__PeHg47_unclassified(100);o__PeHg47_unclassified(100);o__PeHg47_unclassified(100);.3	61.8881	-1.21903	0.37943	-3.2128	0.00131447	0.0132607
k__Bacteria(100);p__Planctomycetes(100);c__vadinHA49(100);o__PeHg47(100);o__PeHg47_unclassified(100);o__PeHg47_unclassified(100);o__PeHg47_unclassified(100);	265.119	-1.16483	0.405515	-2.87248	0.00407263	0.033063
k__Bacteria(100);p__Proteobacteria(100);c__Deltaproteobacteria(100);o__Desulfarculales(100);f__Desulfarculaceae(100);f__Desulfarculaceae_unclassified(100);f__Desulfarculaceae_unclassified(100);	207.851	1.19358	0.427311	2.79323	0.00521847	0.0404505
k__Bacteria(100);p__Firmicutes(100);c__Clostridia(100);c__Clostridia_unclassified(100);c__Clostridia_unclassified(100);c__Clostridia_unclassified(100);c__Clostridia_unclassified(100);	38.762	1.27282	0.450029	2.8283	0.0046796	0.0370053
k__Bacteria(100);p__Proteobacteria(100);c__Deltaproteobacteria(100);o__Desulfovibrionales(93);f__Desulfovibrionaceae(93);g__Desulfovibrio(93);g__Desulfovibrio_unclassified(93);	130.374	1.27509	0.465367	2.73996	0.00614463	0.0460679
k__Bacteria(100);p__Firmicutes(100);c__Clostridia(100);o__Clostridiales(100);f__Ruminococcaceae(100);f__Ruminococcaceae_unclassified(100);f__Ruminococcaceae_unclassified(100);.9	59.2088	1.56691	0.489869	3.19863	0.00138082	0.0137282
k__Bacteria(100);p__Firmicutes(100);c__Clostridia(100);o__Clostridiales(100);f__Ruminococcaceae(100);f__Ruminococcaceae_unclassified(100);f__Ruminococcaceae_unclassified(100);.4	100.309	1.57266	0.448523	3.5063	0.000454383	0.00569328
k__Bacteria(100);p__Verrucomicrobia(100);c__Opitutae(100);o__Opitutales(100);f__Opitutaceae(100);g__Opitutus(100);g__Opitutus_unclassified(100);	31.8485	1.75828	0.481563	3.65119	0.000261027	0.00356348
k__Bacteria(100);p__Firmicutes(100);c__Clostridia(100);o__Clostridiales(100);o__Clostridiales_unclassified(75);o__Clostridiales_unclassified(75);o__Clostridiales_unclassified(75);	61.3536	1.76924	0.425356	4.15944	3.19032e-05	0.000634088
k__Bacteria(100);k__Bacteria_unclassified(100);k__Bacteria_unclassified(100);k__Bacteria_unclassified(100);k__Bacteria_unclassified(100);k__Bacteria_unclassified(100);k__Bacteria_unclassified(100);.32	15.0312	1.77817	0.547181	3.24969	0.00115532	0.0120083
k__Bacteria(100);p__Firmicutes(100);c__Clostridia(100);o__Clostridiales(100);f__Lachnospiraceae(100);f__Lachnospiraceae_unclassified(94);f__Lachnospiraceae_unclassified(94);	44.1158	1.8764	0.586002	3.20203	0.00136464	0.0136166
k__Bacteria(100);p__Proteobacteria(100);p__Proteobacteria_unclassified(100);p__Proteobacteria_unclassified(100);p__Proteobacteria_unclassified(100);p__Proteobacteria_unclassified(100);p__Proteobacteria_unclassified(100);	102.492	1.92189	0.603815	3.18291	0.00145804	0.0142834
k__Bacteria(100);p__Proteobacteria(100);c__Deltaproteobacteria(100);o__Desulfovibrionales(98);o__Desulfovibrionales_unclassified(90);o__Desulfovibrionales_unclassified(90);o__Desulfovibrionales_unclassified(90);	32.5083	1.95587	0.519343	3.76604	0.000165855	0.00246387
k__Bacteria(100);p__Proteobacteria(100);c__Betaproteobacteria(100);o__Burkholderiales(100);f__Oxalobacteraceae(100);f__Oxalobacteraceae_unclassified(100);f__Oxalobacteraceae_unclassified(100);	63.1807	2.08779	0.455354	4.58497	4.54041e-06	0.000116438
k__Bacteria(100);p__Bacteroidetes(100);c__Bacteroidia(100);o__Bacteroidales(100);f__Rikenellaceae(100);f__Rikenellaceae_unclassified(100);f__Rikenellaceae_unclassified(100);.12	32.5503	2.13178	0.705882	3.02002	0.0025276	0.0221589
k__Bacteria(100);p__Bacteroidetes(100);c__Bacteroidia(100);o__Bacteroidales(100);o__Bacteroidales_unclassified(100);o__Bacteroidales_unclassified(100);o__Bacteroidales_unclassified(100);.3	275.122	2.13447	0.778883	2.74042	0.00613606	0.0460679
k__Bacteria(100);p__Tenericutes(100);c__Mollicutes(100);o__Acholeplasmatales(100);f__Acholeplasmataceae(100);g__Acholeplasma(93);g__Acholeplasma_unclassified(93);	264.914	2.18817	0.559738	3.90928	9.25709e-05	0.00152105
k__Bacteria(100);p__Proteobacteria(100);c__Deltaproteobacteria(100);o__Desulfovibrionales(100);f__Desulfovibrionaceae(100);g__Desulfovibrio(100);s__cuneatus(65);	19.5321	2.27411	0.724701	3.138	0.00170106	0.0159853
k__Bacteria(100);p__Firmicutes(100);c__Erysipelotrichi(100);o__Erysipelotrichales(100);f__Erysipelotrichaceae(100);f__Erysipelotrichaceae_unclassified(100);f__Erysipelotrichaceae_unclassified(100);	112.214	2.28409	0.592583	3.85447	0.000115982	0.00183962
k__Bacteria(100);p__Firmicutes(100);c__Clostridia(100);o__Clostridiales(100);f__Christensenellaceae(100);f__Christensenellaceae_unclassified(100);f__Christensenellaceae_unclassified(100);.6	13.8169	2.32643	0.636557	3.6547	0.000257482	0.00353265
k__Bacteria(100);p__Synergistetes(100);c__Synergistia(100);o__Synergistales(100);f__Synergistaceae(100);g__Candidatus_Tammella(100);g__Candidatus_Tammella_unclassified(100);.3	19.9881	2.33424	0.831972	2.80567	0.00502117	0.0392538
k__Bacteria(100);k__Bacteria_unclassified(100);k__Bacteria_unclassified(100);k__Bacteria_unclassified(100);k__Bacteria_unclassified(100);k__Bacteria_unclassified(100);k__Bacteria_unclassified(100);.38	14.384	2.40159	0.728364	3.29723	0.000976424	0.0105485
k__Bacteria(100);k__Bacteria_unclassified(100);k__Bacteria_unclassified(100);k__Bacteria_unclassified(100);k__Bacteria_unclassified(100);k__Bacteria_unclassified(100);k__Bacteria_unclassified(100);.122	3.01417	2.41956	0.892328	2.71151	0.00669769	0.0490093
k__Bacteria(100);p__Proteobacteria(100);c__Deltaproteobacteria(100);o__Desulfobacterales(100);f__Desulfobulbaceae(100);g__Desulfobulbus(100);s__rhabdoformis(100);	106.765	2.43015	0.897913	2.70644	0.00680089	0.0495004
k__Bacteria(100);p__Tenericutes(100);c__CK-1C4-19(100);c__CK-1C4-19_unclassified(100);c__CK-1C4-19_unclassified(100);c__CK-1C4-19_unclassified(100);c__CK-1C4-19_unclassified(100);	9.22004	2.49208	0.882325	2.82444	0.0047363	0.037346
k__Bacteria(100);p__Verrucomicrobia(100);c__Verruco-5(100);o__LD1-PB3(100);o__LD1-PB3_unclassified(100);o__LD1-PB3_unclassified(100);o__LD1-PB3_unclassified(100);	43.7019	2.50085	0.906108	2.75999	0.00578035	0.0439674
k__Bacteria(100);p__Spirochaetes(100);c__Spirochaetes(100);o__Spirochaetales(100);f__Spirochaetaceae(100);g__Treponema(100);g__Treponema_unclassified(100);	69.8678	2.57745	0.643108	4.00781	6.12847e-05	0.00106434
k__Bacteria(100);p__Proteobacteria(100);p__Proteobacteria_unclassified(100);p__Proteobacteria_unclassified(100);p__Proteobacteria_unclassified(100);p__Proteobacteria_unclassified(100);p__Proteobacteria_unclassified(100);.31	4.00455	2.59159	0.849086	3.05221	0.00227161	0.0203039
k__Bacteria(100);p__Bacteroidetes(100);c__Bacteroidia(100);o__Bacteroidales(100);f__Porphyromonadaceae(100);g__Parabacteroides(100);g__Parabacteroides_unclassified(100);	173.171	2.6234	0.850257	3.08542	0.00203262	0.0184076
k__Bacteria(100);p__Firmicutes(100);c__Clostridia(100);o__Clostridiales(100);f__Ruminococcaceae(100);f__Ruminococcaceae_unclassified(100);f__Ruminococcaceae_unclassified(100);.68	6.97158	2.62991	0.967063	2.71948	0.00653846	0.0483599
k__Bacteria(100);p__Firmicutes(100);c__Clostridia(100);o__Clostridiales(100);f__Lachnospiraceae(100);g__Clostridium(99);s__colinum(96);	1.82054	2.64544	0.924293	2.86213	0.00420809	0.0337827
k__Bacteria(100);p__Firmicutes(100);c__Clostridia(100);o__Clostridiales(100);f__Ruminococcaceae(100);f__Ruminococcaceae_unclassified(100);f__Ruminococcaceae_unclassified(100);.69	4.95793	2.65444	0.923516	2.87427	0.0040496	0.0330511
k__Bacteria(100);p__Firmicutes(100);p__Firmicutes_unclassified(100);p__Firmicutes_unclassified(100);p__Firmicutes_unclassified(100);p__Firmicutes_unclassified(100);p__Firmicutes_unclassified(100);.23	10.7588	2.66643	0.740106	3.60276	0.000314852	0.00415363
k__Bacteria(100);p__Bacteroidetes(100);c__Bacteroidia(100);o__Bacteroidales(100);f__Porphyromonadaceae(100);g__Tannerella(100);g__Tannerella_unclassified(100);	75.4641	2.73949	0.697077	3.92997	8.49578e-05	0.00142313
k__Bacteria(100);p__Proteobacteria(100);c__Deltaproteobacteria(100);o__Desulfovibrionales(100);f__Desulfovibrionaceae(100);g__Desulfovibrio(100);g__Desulfovibrio_unclassified(100);.7	35.6949	2.74651	0.547921	5.0126	5.36997e-07	1.77532e-05
k__Bacteria(100);p__Bacteroidetes(100);c__Bacteroidia(100);o__Bacteroidales(100);f__Porphyromonadaceae(100);g__Dysgonomonas(100);g__Dysgonomonas_unclassified(100);.1	110.596	2.76564	0.870524	3.17698	0.00148817	0.0144295
k__Bacteria(100);p__Bacteroidetes(100);c__Bacteroidia(100);o__Bacteroidales(100);o__Bacteroidales_unclassified(95);o__Bacteroidales_unclassified(95);o__Bacteroidales_unclassified(95);	5.45586	2.84367	0.833433	3.41199	0.000644896	0.00743527
k__Bacteria(100);p__Firmicutes(100);c__Clostridia(100);o__Clostridiales(100);f__Ruminococcaceae(100);f__Ruminococcaceae_unclassified(100);f__Ruminococcaceae_unclassified(100);.18	28.4815	2.85591	0.555342	5.14261	2.70944e-07	1.00469e-05
k__Bacteria(100);p__Firmicutes(100);c__Clostridia(100);o__Clostridiales(100);f__Ruminococcaceae(85);f__Ruminococcaceae_unclassified(85);f__Ruminococcaceae_unclassified(85);	6.57324	2.86371	0.995575	2.87643	0.00402195	0.032944
k__Bacteria(100);p__Bacteroidetes(100);c__Bacteroidia(100);o__Bacteroidales(100);f__Rikenellaceae(100);f__Rikenellaceae_unclassified(100);f__Rikenellaceae_unclassified(100);.20	19.556	3.02596	0.8145	3.71511	0.000203115	0.0028582
k__Bacteria(100);p__Firmicutes(100);p__Firmicutes_unclassified(100);p__Firmicutes_unclassified(100);p__Firmicutes_unclassified(100);p__Firmicutes_unclassified(100);p__Firmicutes_unclassified(100);.59	3.29677	3.02875	1.08962	2.77963	0.00544208	0.0415963
k__Bacteria(100);k__Bacteria_unclassified(100);k__Bacteria_unclassified(100);k__Bacteria_unclassified(100);k__Bacteria_unclassified(100);k__Bacteria_unclassified(100);k__Bacteria_unclassified(100);.13	31.933	3.04232	0.969874	3.13681	0.00170794	0.0159952
k__Bacteria(100);p__Firmicutes(100);c__Clostridia(100);o__Clostridiales(100);f__Ruminococcaceae(100);f__Ruminococcaceae_unclassified(100);f__Ruminococcaceae_unclassified(100);.62	6.52117	3.06507	0.974927	3.1439	0.00166712	0.0157744
k__Bacteria(100);p__Proteobacteria(100);c__Deltaproteobacteria(100);c__Deltaproteobacteria_unclassified(95);c__Deltaproteobacteria_unclassified(95);c__Deltaproteobacteria_unclassified(95);c__Deltaproteobacteria_unclassified(95);	72.8821	3.14528	1.08488	2.89919	0.0037413	0.031204
k__Bacteria(100);p__Firmicutes(100);c__Clostridia(100);o__Clostridiales(100);f__Christensenellaceae(100);f__Christensenellaceae_unclassified(100);f__Christensenellaceae_unclassified(100);.2	21.6401	3.18264	0.690185	4.61128	4.00191e-06	0.000105589
k__Bacteria(100);p__Synergistetes(100);c__Synergistia(100);o__Synergistales(100);f__Synergistaceae(100);g__Candidatus_Tammella(100);g__Candidatus_Tammella_unclassified(100);.2	26.2069	3.24067	1.13558	2.85376	0.00432054	0.0345643
k__Bacteria(100);k__Bacteria_unclassified(100);k__Bacteria_unclassified(100);k__Bacteria_unclassified(100);k__Bacteria_unclassified(100);k__Bacteria_unclassified(100);k__Bacteria_unclassified(100);.93	4.49032	3.2451	0.795812	4.07772	4.54802e-05	0.000837569
k__Bacteria(100);p__Firmicutes(100);c__Clostridia(100);o__Clostridiales(100);f__Dehalobacteriaceae(100);g__Dehalobacterium(100);g__Dehalobacterium_unclassified(100);.1	9.02132	3.25303	0.756195	4.30184	1.69384e-05	0.000360302
k__Bacteria(100);p__Firmicutes(100);c__Clostridia(100);o__Clostridiales(100);f__Ruminococcaceae(99);f__Ruminococcaceae_unclassified(99);f__Ruminococcaceae_unclassified(99);.1	15.7902	3.25374	0.644067	5.05186	4.37526e-07	1.48219e-05
k__Bacteria(100);p__Bacteroidetes(100);c__Bacteroidia(100);o__Bacteroidales(100);o__Bacteroidales_unclassified(100);o__Bacteroidales_unclassified(100);o__Bacteroidales_unclassified(100);.25	13.2219	3.28823	1.02625	3.20411	0.00135483	0.0135681
k__Bacteria(100);p__Bacteroidetes(100);c__Bacteroidia(100);o__Bacteroidales(100);f__Porphyromonadaceae(100);g__Dysgonomonas(52);g__Dysgonomonas_unclassified(52);	30.3106	3.30401	1.01947	3.24092	0.00119145	0.0122447
k__Bacteria(100);p__Bacteroidetes(100);c__Bacteroidia(100);o__Bacteroidales(100);f__Rikenellaceae(100);f__Rikenellaceae_unclassified(100);f__Rikenellaceae_unclassified(100);.53	4.74335	3.34354	1.07979	3.09646	0.00195846	0.0179733
k__Bacteria(100);p__Firmicutes(100);c__Clostridia(100);o__Clostridiales(100);f__Lachnospiraceae(100);g__Clostridium(56);g__Clostridium_unclassified(56);	27.5153	3.39329	1.18566	2.86194	0.00421053	0.0337827
k__Bacteria(100);p__Tenericutes(100);c__Mollicutes(100);o__RF39(100);o__RF39_unclassified(100);o__RF39_unclassified(100);o__RF39_unclassified(100);.14	4.21885	3.39342	1.24231	2.73154	0.00630397	0.0470057
k__Bacteria(100);p__Firmicutes(100);c__Clostridia(100);o__Clostridiales(100);f__Dehalobacteriaceae(100);g__Dehalobacterium(100);g__Dehalobacterium_unclassified(100);.8	4.29879	3.40001	0.8571	3.96688	7.28211e-05	0.00124113
k__Bacteria(100);p__Firmicutes(100);c__Clostridia(100);o__Clostridiales(100);o__Clostridiales_unclassified(100);o__Clostridiales_unclassified(100);o__Clostridiales_unclassified(100);.57	1.90913	3.40531	1.16005	2.93548	0.00333031	0.0282049
k__Bacteria(100);p__Proteobacteria(100);c__Deltaproteobacteria(100);o__Spirobacillales(100);o__Spirobacillales_unclassified(100);o__Spirobacillales_unclassified(100);o__Spirobacillales_unclassified(100);	2.97895	3.45213	1.1507	3.00003	0.00269956	0.0234417
k__Archaea(100);p__Euryarchaeota(100);c__Methanomicrobia(100);o__Methanomicrobiales(100);o__Methanomicrobiales_unclassified(100);o__Methanomicrobiales_unclassified(100);o__Methanomicrobiales_unclassified(100);	17.0653	3.46019	1.0658	3.24656	0.00116809	0.0120593
k__Bacteria(100);p__Firmicutes(100);c__Clostridia(100);o__Clostridiales(100);f__Ruminococcaceae(100);f__Ruminococcaceae_unclassified(100);f__Ruminococcaceae_unclassified(100);.12	36.9866	3.4772	0.856773	4.05848	4.9393e-05	0.000897578
k__Bacteria(100);p__Firmicutes(100);p__Firmicutes_unclassified(100);p__Firmicutes_unclassified(100);p__Firmicutes_unclassified(100);p__Firmicutes_unclassified(100);p__Firmicutes_unclassified(100);.70	2.04495	3.48126	1.2361	2.81633	0.00485757	0.0381925
k__Bacteria(100);p__Proteobacteria(100);p__Proteobacteria_unclassified(100);p__Proteobacteria_unclassified(100);p__Proteobacteria_unclassified(100);p__Proteobacteria_unclassified(100);p__Proteobacteria_unclassified(100);.22	6.21673	3.58269	1.01395	3.5334	0.000410247	0.00521166
k__Bacteria(100);p__Bacteroidetes(100);c__Bacteroidia(100);o__Bacteroidales(100);f__Porphyromonadaceae(100);g__Dysgonomonas(100);g__Dysgonomonas_unclassified(100);.11	32.4906	3.59632	1.20489	2.98478	0.00283784	0.0243374
k__Bacteria(100);p__Bacteroidetes(100);c__Bacteroidia(100);o__Bacteroidales(100);f__Porphyromonadaceae(100);g__Dysgonomonas(100);g__Dysgonomonas_unclassified(100);.9	23.8776	3.61255	1.06634	3.38779	0.000704575	0.00802221
k__Bacteria(100);p__Firmicutes(100);c__Clostridia(100);o__Clostridiales(100);f__Peptostreptococcaceae(100);f__Peptostreptococcaceae_unclassified(100);f__Peptostreptococcaceae_unclassified(100);	81.0353	3.64499	1.32806	2.7446	0.0060584	0.0457236
k__Bacteria(100);p__Firmicutes(100);c__Clostridia(100);o__Clostridiales(100);f__Ruminococcaceae(100);f__Ruminococcaceae_unclassified(100);f__Ruminococcaceae_unclassified(100);.137	1.34974	3.64963	1.28952	2.83024	0.00465135	0.0368881
k__Bacteria(100);p__Spirochaetes(100);c__Spirochaetes(100);o__Spirochaetales(100);f__Spirochaetaceae(100);g__Treponema(100);g__Treponema_unclassified(100);.5	5.648	3.66237	1.1844	3.09218	0.00198691	0.0181156
k__Bacteria(100);p__Tenericutes(100);c__Mollicutes(100);o__RF39(99);o__RF39_unclassified(99);o__RF39_unclassified(99);o__RF39_unclassified(99);	2.22459	3.71392	1.15493	3.2157	0.00130126	0.0131758
k__Bacteria(100);p__Proteobacteria(100);c__Deltaproteobacteria(100);o__Desulfovibrionales(100);f__Desulfovibrionaceae(100);g__Desulfovibrio(100);s__cuneatus(100);.1	66.1119	3.73872	1.17361	3.18567	0.00144418	0.0142037
k__Bacteria(100);p__Spirochaetes(100);c__[Leptospirae](100);o__[Leptospirales](100);f__Sediment-4(100);g__SJA-88(100);g__SJA-88_unclassified(100);	28.3718	3.74545	0.749905	4.99456	5.89694e-07	1.92633e-05
k__Bacteria(100);p__Bacteroidetes(100);c__Bacteroidia(100);o__Bacteroidales(100);f__Porphyromonadaceae(100);g__Dysgonomonas(100);g__Dysgonomonas_unclassified(100);.3	76.4652	3.74811	0.839725	4.46349	8.06342e-06	0.000197554
k__Bacteria(100);p__Firmicutes(100);c__Clostridia(100);o__Clostridiales(100);f__Ruminococcaceae(100);f__Ruminococcaceae_unclassified(100);f__Ruminococcaceae_unclassified(100);.100	2.86326	3.78765	1.12726	3.36005	0.000779288	0.00872802
k__Bacteria(100);k__Bacteria_unclassified(100);k__Bacteria_unclassified(100);k__Bacteria_unclassified(100);k__Bacteria_unclassified(100);k__Bacteria_unclassified(100);k__Bacteria_unclassified(100);.8	41.5997	3.83282	0.711795	5.38473	7.25533e-08	3.21107e-06
k__Bacteria(100);p__Firmicutes(100);c__Clostridia(100);o__Clostridiales(100);f__Ruminococcaceae(100);f__Ruminococcaceae_unclassified(100);f__Ruminococcaceae_unclassified(100);.25	21.3895	3.84088	0.738932	5.19789	2.01568e-07	7.90145e-06
k__Bacteria(100);p__Proteobacteria(100);c__Alphaproteobacteria(100);c__Alphaproteobacteria_unclassified(100);c__Alphaproteobacteria_unclassified(100);c__Alphaproteobacteria_unclassified(100);c__Alphaproteobacteria_unclassified(100);.4	2.70896	3.84762	1.32199	2.91048	0.00360873	0.0302824
k__Bacteria(100);p__Tenericutes(100);c__Mollicutes(100);o__RF39(100);o__RF39_unclassified(100);o__RF39_unclassified(100);o__RF39_unclassified(100);.16	2.87865	3.86429	1.42255	2.71646	0.00659848	0.0485421
k__Bacteria(100);p__Proteobacteria(100);c__Alphaproteobacteria(100);c__Alphaproteobacteria_unclassified(100);c__Alphaproteobacteria_unclassified(100);c__Alphaproteobacteria_unclassified(100);c__Alphaproteobacteria_unclassified(100);.3	2.96302	3.86999	1.18837	3.25655	0.00112774	0.0118112
k__Bacteria(100);p__Actinobacteria(100);c__Coriobacteriia(100);o__Coriobacteriales(100);f__Coriobacteriaceae(100);g__Enterococcus(100);s__casseliflavus(100);.3	7.68318	3.88145	0.82683	4.69438	2.67421e-06	7.48778e-05
k__Bacteria(100);k__Bacteria_unclassified(100);k__Bacteria_unclassified(100);k__Bacteria_unclassified(100);k__Bacteria_unclassified(100);k__Bacteria_unclassified(100);k__Bacteria_unclassified(100);.40	14.974	3.88975	1.03641	3.7531	0.000174658	0.00255135
k__Bacteria(100);p__Firmicutes(100);c__Clostridia(100);o__Clostridiales(100);f__Ruminococcaceae(100);f__Ruminococcaceae_unclassified(100);f__Ruminococcaceae_unclassified(100);.39	11.9633	4.0559	1.41513	2.8661	0.00415567	0.0336137
k__Bacteria(100);p__Firmicutes(100);c__Clostridia(100);o__Clostridiales(100);f__[Mogibacteriaceae](100);g__Anaerovorax(100);g__Anaerovorax_unclassified(100);.1	8.60363	4.05602	1.02446	3.95918	7.52069e-05	0.00127387
k__Bacteria(100);p__Firmicutes(100);p__Firmicutes_unclassified(100);p__Firmicutes_unclassified(100);p__Firmicutes_unclassified(100);p__Firmicutes_unclassified(100);p__Firmicutes_unclassified(100);.9	26.968	4.05676	1.19987	3.381	0.000722218	0.00818911
k__Bacteria(100);k__Bacteria_unclassified(100);k__Bacteria_unclassified(100);k__Bacteria_unclassified(100);k__Bacteria_unclassified(100);k__Bacteria_unclassified(100);k__Bacteria_unclassified(100);.56	8.06155	4.06377	1.45116	2.80035	0.00510466	0.0396805
k__Bacteria(100);p__Firmicutes(100);c__Clostridia(100);o__Clostridiales(100);f__Ruminococcaceae(100);f__Ruminococcaceae_unclassified(55);f__Ruminococcaceae_unclassified(55);	16.6052	4.08624	1.18694	3.44268	0.000575985	0.00687175
k__Bacteria(100);p__SR1(100);p__SR1_unclassified(100);p__SR1_unclassified(100);p__SR1_unclassified(100);p__SR1_unclassified(100);p__SR1_unclassified(100);	38.9229	4.09949	1.23517	3.31898	0.00090348	0.00991925
k__Bacteria(100);p__Firmicutes(100);c__Clostridia(100);o__Clostridiales(100);o__Clostridiales_unclassified(60);o__Clostridiales_unclassified(60);o__Clostridiales_unclassified(60);	3.28449	4.15991	1.21277	3.43008	0.000603401	0.00707578
k__Bacteria(100);p__Firmicutes(100);c__Clostridia(100);o__Clostridiales(100);f__Eubacteriaceae(100);g__Anaerofustis(100);g__Anaerofustis_unclassified(100);.2	1.42578	4.1699	1.26208	3.30399	0.000953199	0.0103383
k__Bacteria(100);p__Firmicutes(100);c__Clostridia(100);o__Clostridiales(100);f__Lachnospiraceae(100);f__Lachnospiraceae_unclassified(100);f__Lachnospiraceae_unclassified(100);.22	34.9264	4.23233	1.46255	2.89379	0.00380617	0.0315533
k__Bacteria(100);p__Bacteroidetes(100);c__Bacteroidia(100);o__Bacteroidales(100);f__Porphyromonadaceae(100);g__Paludibacter(100);g__Paludibacter_unclassified(100);	100.925	4.234	0.918742	4.60847	4.05646e-06	0.000106009
k__Bacteria(100);p__Bacteroidetes(100);c__Bacteroidia(100);o__Bacteroidales(100);o__Bacteroidales_unclassified(100);o__Bacteroidales_unclassified(100);o__Bacteroidales_unclassified(100);.2	322.982	4.32274	1.53582	2.81462	0.00488353	0.0382869
k__Bacteria(100);p__Bacteroidetes(100);c__Bacteroidia(100);o__Bacteroidales(100);f__Porphyromonadaceae(100);g__Dysgonomonas(100);g__Dysgonomonas_unclassified(100);.28	6.41811	4.36865	1.34197	3.2554	0.00113232	0.011814
k__Bacteria(100);p__Bacteroidetes(100);c__Bacteroidia(100);o__Bacteroidales(100);f__Rikenellaceae(100);f__Rikenellaceae_unclassified(100);f__Rikenellaceae_unclassified(100);.31	10.1861	4.36925	1.00122	4.36392	1.27751e-05	0.000299023
k__Bacteria(100);p__Firmicutes(100);c__Clostridia(100);o__Clostridiales(100);o__Clostridiales_unclassified(100);o__Clostridiales_unclassified(100);o__Clostridiales_unclassified(100);.21	7.40371	4.38508	1.27567	3.43747	0.000587181	0.00691513
k__Bacteria(100);p__Bacteroidetes(100);c__Bacteroidia(100);o__Bacteroidales(100);f__Rikenellaceae(100);f__Rikenellaceae_unclassified(100);f__Rikenellaceae_unclassified(100);.39	8.11258	4.40399	1.33099	3.3088	0.000936954	0.0102024
k__Bacteria(100);p__Proteobacteria(100);c__Deltaproteobacteria(100);o__Desulfarculales(100);f__Desulfarculaceae(100);g__Desulfarculus(100);g__Desulfarculus_unclassified(100);.1	1.80396	4.41961	1.40697	3.14122	0.00168245	0.0158647
k__Bacteria(100);p__Elusimicrobia(100);c__Endomicrobia(100);c__Endomicrobia_unclassified(100);c__Endomicrobia_unclassified(100);c__Endomicrobia_unclassified(100);c__Endomicrobia_unclassified(100);.2	31.7328	4.42267	1.35506	3.26382	0.0010992	0.0117227
k__Bacteria(100);p__Firmicutes(100);c__Clostridia(100);o__Clostridiales(100);f__Lachnospiraceae(88);f__Lachnospiraceae_unclassified(62);f__Lachnospiraceae_unclassified(62);	17.3334	4.42403	1.17215	3.77429	0.000160466	0.00241933
k__Bacteria(100);p__Firmicutes(100);p__Firmicutes_unclassified(100);p__Firmicutes_unclassified(100);p__Firmicutes_unclassified(100);p__Firmicutes_unclassified(100);p__Firmicutes_unclassified(100);.62	1.88222	4.43911	1.45711	3.04653	0.00231501	0.0206246
k__Bacteria(100);p__Proteobacteria(100);p__Proteobacteria_unclassified(100);p__Proteobacteria_unclassified(100);p__Proteobacteria_unclassified(100);p__Proteobacteria_unclassified(100);p__Proteobacteria_unclassified(100);.41	2.98925	4.48142	1.47799	3.03211	0.0024285	0.0214961
k__Bacteria(100);p__Bacteroidetes(100);p__Bacteroidetes_unclassified(100);p__Bacteroidetes_unclassified(100);p__Bacteroidetes_unclassified(100);p__Bacteroidetes_unclassified(100);p__Bacteroidetes_unclassified(100);.21	26.662	4.5346	1.13046	4.01131	6.0384e-05	0.00106214
k__Bacteria(100);p__Bacteroidetes(100);c__Bacteroidia(100);o__Bacteroidales(100);f__Porphyromonadaceae(100);g__Candidatus_Azobacteroides(100);g__Candidatus_Azobacteroides_unclassified(100);.18	27.2966	4.54002	1.30279	3.48485	0.000492407	0.00600518
k__Bacteria(100);p__Tenericutes(100);c__Mollicutes(100);o__RF39(100);o__RF39_unclassified(100);o__RF39_unclassified(100);o__RF39_unclassified(100);.21	1.68081	4.5457	1.57344	2.88902	0.00386441	0.0317483
k__Bacteria(100);p__Bacteroidetes(100);p__Bacteroidetes_unclassified(100);p__Bacteroidetes_unclassified(100);p__Bacteroidetes_unclassified(100);p__Bacteroidetes_unclassified(100);p__Bacteroidetes_unclassified(100);.31	15.3924	4.56303	1.13392	4.02412	5.71881e-05	0.00101899
k__Bacteria(100);p__Proteobacteria(100);c__Deltaproteobacteria(100);o__Desulfovibrionales(100);f__Desulfovibrionaceae(100);g__Desulfovibrio(100);g__Desulfovibrio_unclassified(100);.24	2.69075	4.56322	1.63979	2.7828	0.0053892	0.0414229
k__Bacteria(100);p__Proteobacteria(100);c__Alphaproteobacteria(100);o__RF32(84);o__RF32_unclassified(84);o__RF32_unclassified(84);o__RF32_unclassified(84);	37.7815	4.59383	1.36447	3.36674	0.00076062	0.00858906
k__Bacteria(100);p__Proteobacteria(100);c__Deltaproteobacteria(100);o__Desulfovibrionales(100);f__Desulfovibrionaceae(100);g__Desulfovibrio(99);g__Desulfovibrio_unclassified(99);	4.71147	4.59404	1.18971	3.86148	0.000112704	0.00179803
k__Bacteria(100);p__Firmicutes(100);c__Clostridia(100);o__Clostridiales(100);f__Ruminococcaceae(100);g__Clostridium(93);s__methylpentosum(93);	2.15956	4.60268	1.14082	4.03455	5.47071e-05	0.000981152
k__Bacteria(100);p__Firmicutes(100);c__Clostridia(100);o__Clostridiales(100);f__Veillonellaceae(100);f__Veillonellaceae_unclassified(100);f__Veillonellaceae_unclassified(100);	61.5497	4.60508	0.84947	5.42112	5.92279e-08	2.7546e-06
k__Bacteria(100);p__Firmicutes(100);c__Clostridia(100);o__Clostridiales(100);f__Peptostreptococcaceae(100);f__Peptostreptococcaceae_unclassified(100);f__Peptostreptococcaceae_unclassified(100);.1	42.5893	4.60588	1.29201	3.56489	0.000364016	0.00470702
k__Bacteria(100);p__Firmicutes(100);c__Clostridia(100);o__Clostridiales(100);o__Clostridiales_unclassified(99);o__Clostridiales_unclassified(99);o__Clostridiales_unclassified(99);	98.9004	4.6275	0.731791	6.32353	2.55662e-10	1.84615e-08
k__Bacteria(100);p__Proteobacteria(100);c__Deltaproteobacteria(100);o__Desulfovibrionales(100);f__Desulfovibrionaceae(100);g__Desulfovibrio(100);g__Desulfovibrio_unclassified(100);.13	6.20387	4.71022	0.970481	4.85349	1.21307e-06	3.69853e-05
k__Bacteria(100);p__Tenericutes(100);c__Mollicutes(100);c__Mollicutes_unclassified(74);c__Mollicutes_unclassified(74);c__Mollicutes_unclassified(74);c__Mollicutes_unclassified(74);	2.12137	4.74294	1.45563	3.25834	0.00112064	0.0118112
k__Bacteria(100);p__Firmicutes(100);p__Firmicutes_unclassified(100);p__Firmicutes_unclassified(100);p__Firmicutes_unclassified(100);p__Firmicutes_unclassified(100);p__Firmicutes_unclassified(100);.52	3.65184	4.74879	1.46861	3.23353	0.00122271	0.0124726
k__Bacteria(100);p__Proteobacteria(100);p__Proteobacteria_unclassified(100);p__Proteobacteria_unclassified(100);p__Proteobacteria_unclassified(100);p__Proteobacteria_unclassified(100);p__Proteobacteria_unclassified(100);.38	3.2557	4.77361	1.48644	3.21143	0.00132077	0.0132755
k__Bacteria(100);p__Proteobacteria(100);c__Deltaproteobacteria(100);o__Desulfovibrionales(100);f__Desulfovibrionaceae(100);g__Desulfovibrio(100);g__Desulfovibrio_unclassified(93);	71.0305	4.78834	0.984524	4.86361	1.15264e-06	3.59414e-05
k__Bacteria(100);p__Proteobacteria(100);c__Deltaproteobacteria(100);o__Desulfovibrionales(100);f__Desulfovibrionaceae(99);g__Desulfovibrio(99);g__Desulfovibrio_unclassified(99);	2.83664	4.92648	1.29194	3.81326	0.000137148	0.00210242
k__Bacteria(100);p__Bacteroidetes(100);p__Bacteroidetes_unclassified(100);p__Bacteroidetes_unclassified(100);p__Bacteroidetes_unclassified(100);p__Bacteroidetes_unclassified(100);p__Bacteroidetes_unclassified(100);.55	4.84788	4.92912	1.7011	2.89761	0.00376018	0.0312664
k__Bacteria(100);p__Proteobacteria(100);c__Deltaproteobacteria(100);o__Desulfovibrionales(100);f__Desulfovibrionaceae(100);g__Desulfovibrio(100);s__cuneatus(100);.5	37.1819	4.94678	1.20637	4.10053	4.12197e-05	0.000785465
k__Bacteria(100);p__Bacteroidetes(100);c__Bacteroidia(100);o__Bacteroidales(100);f__[Odoribacteraceae](100);g__Odoribacter(100);g__Odoribacter_unclassified(100);	284.926	4.96445	1.37234	3.6175	0.000297464	0.0039432
k__Bacteria(100);p__Bacteroidetes(100);c__Bacteroidia(100);o__Bacteroidales(100);f__[Odoribacteraceae](100);g__Odoribacter(100);g__Odoribacter_unclassified(100);.3	47.2827	4.96457	1.55542	3.19178	0.00141397	0.0139566
k__Bacteria(100);p__Tenericutes(100);c__Mollicutes(100);o__RF39(98);o__RF39_unclassified(98);o__RF39_unclassified(98);o__RF39_unclassified(98);	2.14821	4.99678	1.37764	3.62707	0.000286654	0.00381835
k__Bacteria(100);p__Firmicutes(100);p__Firmicutes_unclassified(100);p__Firmicutes_unclassified(100);p__Firmicutes_unclassified(100);p__Firmicutes_unclassified(100);p__Firmicutes_unclassified(100);.38	6.51272	5.03697	1.66278	3.02925	0.00245162	0.0216208
k__Bacteria(100);p__Tenericutes(100);c__Mollicutes(100);o__RF39(100);o__RF39_unclassified(100);o__RF39_unclassified(100);o__RF39_unclassified(100);.18	2.50341	5.05217	1.47959	3.41457	0.000638838	0.00739651
k__Bacteria(100);p__Proteobacteria(100);c__Betaproteobacteria(100);o__Nitrosomonadales(100);f__Nitrosomonadaceae(100);f__Nitrosomonadaceae_unclassified(100);f__Nitrosomonadaceae_unclassified(100);	3.6922	5.05312	1.06003	4.76696	1.87026e-06	5.45956e-05
k__Bacteria(100);p__Bacteroidetes(100);c__Bacteroidia(100);o__Bacteroidales(100);o__Bacteroidales_unclassified(100);o__Bacteroidales_unclassified(100);o__Bacteroidales_unclassified(100);.13	33.055	5.05345	1.16802	4.32652	1.51482e-05	0.000337941
k__Bacteria(100);p__Elusimicrobia(100);c__Elusimicrobia(100);o__Elusimicrobiales(100);f__Elusimicrobiaceae(100);g__Elusimicrobium(100);s__minutum(84);	14.5784	5.11202	1.36932	3.73324	0.000189029	0.00272828
k__Bacteria(100);p__Proteobacteria(100);c__Deltaproteobacteria(100);c__Deltaproteobacteria_unclassified(94);c__Deltaproteobacteria_unclassified(94);c__Deltaproteobacteria_unclassified(94);c__Deltaproteobacteria_unclassified(94);	16.0061	5.11724	1.48762	3.4399	0.000581935	0.00688805
k__Bacteria(100);k__Bacteria_unclassified(100);k__Bacteria_unclassified(100);k__Bacteria_unclassified(100);k__Bacteria_unclassified(100);k__Bacteria_unclassified(100);k__Bacteria_unclassified(100);.36	13.0911	5.12344	1.80907	2.83208	0.00462461	0.0367824
k__Bacteria(100);p__Bacteroidetes(100);c__Bacteroidia(100);o__Bacteroidales(100);f__Rikenellaceae(100);f__Rikenellaceae_unclassified(100);f__Rikenellaceae_unclassified(100);.17	19.7043	5.18213	1.47936	3.50296	0.000460123	0.00573898
k__Bacteria(100);p__Firmicutes(100);c__Bacilli(100);o__Lactobacillales(100);f__Lactobacillaceae(100);g__Lactobacillus(100);g__Lactobacillus_unclassified(100);	226.039	5.19393	1.29396	4.01397	5.97054e-05	0.00105698
k__Bacteria(100);p__Bacteroidetes(100);c__Bacteroidia(100);o__Bacteroidales(100);o__Bacteroidales_unclassified(100);o__Bacteroidales_unclassified(100);o__Bacteroidales_unclassified(100);.51	2.34886	5.23315	1.67693	3.12068	0.00180432	0.0168404
k__Bacteria(100);p__Firmicutes(100);c__Clostridia(100);o__Clostridiales(100);f__Ruminococcaceae(100);f__Ruminococcaceae_unclassified(100);f__Ruminococcaceae_unclassified(100);.103	2.16885	5.32847	1.93077	2.75976	0.00578435	0.0439674
k__Bacteria(100);p__Tenericutes(100);c__Mollicutes(100);o__RF39(100);o__RF39_unclassified(100);o__RF39_unclassified(100);o__RF39_unclassified(100);.10	5.83296	5.4177	1.54738	3.5012	0.000463164	0.00575077
k__Bacteria(100);p__Bacteroidetes(100);p__Bacteroidetes_unclassified(100);p__Bacteroidetes_unclassified(100);p__Bacteroidetes_unclassified(100);p__Bacteroidetes_unclassified(100);p__Bacteroidetes_unclassified(100);.66	4.68408	5.46743	1.43332	3.81452	0.000136449	0.00210242
k__Bacteria(100);p__Firmicutes(100);c__Clostridia(100);o__Clostridiales(100);f__Lachnospiraceae(100);f__Lachnospiraceae_unclassified(100);f__Lachnospiraceae_unclassified(100);.7	42.7204	5.49733	1.3853	3.96835	7.23722e-05	0.00124113
k__Bacteria(100);p__Firmicutes(100);c__Clostridia(100);o__Clostridiales(100);o__Clostridiales_unclassified(100);o__Clostridiales_unclassified(100);o__Clostridiales_unclassified(100);.34	4.68564	5.49942	1.32265	4.15789	3.21204e-05	0.000634088
k__Bacteria(100);p__Bacteroidetes(100);c__Bacteroidia(100);o__Bacteroidales(100);f__Porphyromonadaceae(100);g__Paludibacter(100);g__Paludibacter_unclassified(100);.3	37.4827	5.61309	1.49541	3.75354	0.000174355	0.00255135
k__Bacteria(100);p__Firmicutes(100);c__Clostridia(100);o__Clostridiales(100);f__Lachnospiraceae(100);f__Lachnospiraceae_unclassified(100);f__Lachnospiraceae_unclassified(100);.30	7.32899	5.64535	1.52809	3.69438	0.000220425	0.00307029
k__Bacteria(100);p__GN02(100);c__BD1-5(100);c__BD1-5_unclassified(100);c__BD1-5_unclassified(100);c__BD1-5_unclassified(100);c__BD1-5_unclassified(100);.14	1.99252	5.66595	1.99865	2.83489	0.00458418	0.0365669
k__Bacteria(100);p__Bacteroidetes(100);c__Bacteroidia(100);o__Bacteroidales(100);o__Bacteroidales_unclassified(78);o__Bacteroidales_unclassified(78);o__Bacteroidales_unclassified(78);.1	10.8816	5.76635	1.99585	2.88917	0.00386256	0.0317483
k__Bacteria(100);p__Bacteroidetes(100);c__Bacteroidia(100);o__Bacteroidales(100);f__Porphyromonadaceae(100);f__Porphyromonadaceae_unclassified(100);f__Porphyromonadaceae_unclassified(100);.13	25.4648	5.80314	1.71174	3.3902	0.000698415	0.00798675
k__Bacteria(100);p__Firmicutes(100);c__Clostridia(100);o__Clostridiales(100);f__Lachnospiraceae(100);f__Lachnospiraceae_unclassified(100);f__Lachnospiraceae_unclassified(100);.1	130.635	5.92351	1.34413	4.40694	1.04841e-05	0.000250161
k__Bacteria(100);p__Elusimicrobia(100);c__Elusimicrobia(100);o__Elusimicrobiales(100);f__Elusimicrobiaceae(100);f__Elusimicrobiaceae_unclassified(100);f__Elusimicrobiaceae_unclassified(100);.1	5.0644	5.97719	1.92996	3.09706	0.00195448	0.0179733
k__Bacteria(100);p__Firmicutes(100);c__Clostridia(100);o__Clostridiales(100);f__Lachnospiraceae(100);g__Clostridium(100);g__Clostridium_unclassified(100);.9	8.13762	5.98616	1.99533	3.00009	0.002699	0.0234417
k__Bacteria(100);p__Bacteroidetes(100);c__Bacteroidia(100);o__Bacteroidales(100);f__Porphyromonadaceae(100);g__Dysgonomonas(100);g__Dysgonomonas_unclassified(100);.35	4.92722	5.99441	1.33726	4.48261	7.37349e-06	0.000182278
k__Bacteria(100);p__Proteobacteria(100);p__Proteobacteria_unclassified(100);p__Proteobacteria_unclassified(100);p__Proteobacteria_unclassified(100);p__Proteobacteria_unclassified(100);p__Proteobacteria_unclassified(100);.6	21.5167	6.05409	1.4886	4.06698	4.76273e-05	0.000871262
k__Bacteria(100);p__Firmicutes(100);c__Clostridia(100);o__Clostridiales(100);f__Ruminococcaceae(100);f__Ruminococcaceae_unclassified(100);f__Ruminococcaceae_unclassified(100);.64	8.74421	6.06676	1.40972	4.30352	1.68108e-05	0.000360302
k__Bacteria(100);p__Bacteroidetes(100);c__Bacteroidia(100);o__Bacteroidales(100);f__Porphyromonadaceae(100);g__Candidatus_Azobacteroides(100);g__Candidatus_Azobacteroides_unclassified(100);.25	19.3605	6.1526	1.3908	4.42378	9.69888e-06	0.000233454
k__Bacteria(100);k__Bacteria_unclassified(100);k__Bacteria_unclassified(100);k__Bacteria_unclassified(100);k__Bacteria_unclassified(100);k__Bacteria_unclassified(100);k__Bacteria_unclassified(100);.49	10.5265	6.16485	1.08764	5.66809	1.44398e-08	7.33758e-07
k__Bacteria(100);p__Firmicutes(100);p__Firmicutes_unclassified(100);p__Firmicutes_unclassified(100);p__Firmicutes_unclassified(100);p__Firmicutes_unclassified(100);p__Firmicutes_unclassified(100);.39	6.06679	6.27325	1.92632	3.2566	0.00112757	0.0118112
k__Bacteria(100);p__Bacteroidetes(100);p__Bacteroidetes_unclassified(100);p__Bacteroidetes_unclassified(100);p__Bacteroidetes_unclassified(100);p__Bacteroidetes_unclassified(100);p__Bacteroidetes_unclassified(100);.24	23.3454	6.34439	1.4653	4.32976	1.49275e-05	0.000335746
k__Bacteria(100);p__GN02(100);c__BD1-5(100);c__BD1-5_unclassified(100);c__BD1-5_unclassified(100);c__BD1-5_unclassified(100);c__BD1-5_unclassified(100);.4	3.38322	6.43264	2.37664	2.70662	0.00679728	0.0495004
k__Bacteria(100);p__Bacteroidetes(100);c__Bacteroidia(100);o__Bacteroidales(100);f__Porphyromonadaceae(100);g__Dysgonomonas(100);g__Dysgonomonas_unclassified(100);.29	6.80839	6.5148	1.5126	4.30703	1.65463e-05	0.000357505
k__Bacteria(100);p__Firmicutes(100);c__Clostridia(100);o__Clostridiales(100);f__Ruminococcaceae(100);g__Ruminococcus(100);g__Ruminococcus_unclassified(100);.16	4.34786	6.57354	2.41852	2.71801	0.00656766	0.0484453
k__Archaea(100);p__Euryarchaeota(100);c__Methanobacteria(100);o__Methanobacteriales(100);f__Methanobacteriaceae(100);g__Methanobrevibacter(100);g__Methanobrevibacter_unclassified(100);.1	9.19078	6.58487	1.37141	4.80153	1.57458e-06	4.64585e-05
k__Bacteria(100);p__Proteobacteria(100);c__Deltaproteobacteria(100);o__Desulfovibrionales(100);f__Desulfovibrionaceae(100);f__Desulfovibrionaceae_unclassified(100);f__Desulfovibrionaceae_unclassified(100);.3	8.17752	6.60294	2.30438	2.86539	0.00416497	0.0336137
k__Bacteria(100);k__Bacteria_unclassified(100);k__Bacteria_unclassified(100);k__Bacteria_unclassified(100);k__Bacteria_unclassified(100);k__Bacteria_unclassified(100);k__Bacteria_unclassified(100);.60	6.48502	6.61703	1.30412	5.07395	3.89642e-07	1.35339e-05
k__Bacteria(100);p__Proteobacteria(100);c__Deltaproteobacteria(100);o__Desulfovibrionales(100);f__Desulfovibrionaceae(99);f__Desulfovibrionaceae_unclassified(98);f__Desulfovibrionaceae_unclassified(98);	11.1726	6.65805	1.09778	6.06502	1.31939e-09	8.22817e-08
k__Bacteria(100);p__Firmicutes(100);p__Firmicutes_unclassified(100);p__Firmicutes_unclassified(100);p__Firmicutes_unclassified(100);p__Firmicutes_unclassified(100);p__Firmicutes_unclassified(100);.53	4.64786	6.67305	2.17852	3.06311	0.00219053	0.0197076
k__Bacteria(100);p__Proteobacteria(100);c__Alphaproteobacteria(100);c__Alphaproteobacteria_unclassified(100);c__Alphaproteobacteria_unclassified(100);c__Alphaproteobacteria_unclassified(100);c__Alphaproteobacteria_unclassified(100);	8.72601	6.85409	2.08786	3.28283	0.00102769	0.0110156
k__Bacteria(100);p__Firmicutes(100);c__Clostridia(100);o__Clostridiales(100);f__Ruminococcaceae(100);g__Ruminococcus(100);g__Ruminococcus_unclassified(100);.12	7.2133	6.90156	2.3798	2.90006	0.00373087	0.031204
k__Bacteria(100);p__Bacteroidetes(100);c__Bacteroidia(100);o__Bacteroidales(100);o__Bacteroidales_unclassified(100);o__Bacteroidales_unclassified(100);o__Bacteroidales_unclassified(100);.21	20.2937	6.9045	1.39518	4.94882	7.46666e-07	2.41041e-05
k__Bacteria(100);p__Bacteroidetes(100);c__Bacteroidia(100);o__Bacteroidales(100);f__Porphyromonadaceae(100);g__Dysgonomonas(100);g__Dysgonomonas_unclassified(100);.7	69.0424	6.90519	1.82659	3.78037	0.000156596	0.00237404
k__Bacteria(100);k__Bacteria_unclassified(100);k__Bacteria_unclassified(100);k__Bacteria_unclassified(100);k__Bacteria_unclassified(100);k__Bacteria_unclassified(100);k__Bacteria_unclassified(100);	172.432	7.0001	1.7132	4.08599	4.38896e-05	0.000824885
k__Bacteria(100);p__Bacteroidetes(100);p__Bacteroidetes_unclassified(100);p__Bacteroidetes_unclassified(100);p__Bacteroidetes_unclassified(100);p__Bacteroidetes_unclassified(100);p__Bacteroidetes_unclassified(100);.8	187.456	7.17015	0.966635	7.41764	1.1923e-13	1.42246e-11
k__Bacteria(100);p__Firmicutes(100);c__Clostridia(100);o__Clostridiales(99);o__Clostridiales_unclassified(99);o__Clostridiales_unclassified(99);o__Clostridiales_unclassified(99);	31.9722	7.18065	2.42103	2.96594	0.00301755	0.0256352
k__Bacteria(100);p__Verrucomicrobia(100);c__Opitutae(100);o__[Cerasicoccales](100);f__[Cerasicoccaceae](100);f__[Cerasicoccaceae]_unclassified(100);f__[Cerasicoccaceae]_unclassified(100);.3	5.79162	7.21444	2.4691	2.92189	0.00347911	0.0292843
k__Bacteria(100);p__Firmicutes(100);c__Clostridia(100);o__Clostridiales(100);o__Clostridiales_unclassified(100);o__Clostridiales_unclassified(100);o__Clostridiales_unclassified(100);.14	13.5048	7.23941	1.57221	4.60461	4.13243e-06	0.000106975
k__Bacteria(100);p__Bacteroidetes(100);c__Bacteroidia(100);o__Bacteroidales(100);o__Bacteroidales_unclassified(100);o__Bacteroidales_unclassified(100);o__Bacteroidales_unclassified(100);.28	11.8284	7.25821	1.42776	5.08362	3.703e-07	1.31962e-05
k__Bacteria(100);p__Proteobacteria(100);p__Proteobacteria_unclassified(100);p__Proteobacteria_unclassified(100);p__Proteobacteria_unclassified(100);p__Proteobacteria_unclassified(100);p__Proteobacteria_unclassified(100);.13	13.5033	7.32499	1.86727	3.92283	8.75135e-05	0.00145538
k__Bacteria(100);p__Bacteroidetes(100);p__Bacteroidetes_unclassified(100);p__Bacteroidetes_unclassified(100);p__Bacteroidetes_unclassified(100);p__Bacteroidetes_unclassified(100);p__Bacteroidetes_unclassified(100);.42	12.5635	7.35814	2.20303	3.34	0.000837777	0.00930713
k__Bacteria(100);p__Bacteroidetes(100);p__Bacteroidetes_unclassified(100);p__Bacteroidetes_unclassified(100);p__Bacteroidetes_unclassified(100);p__Bacteroidetes_unclassified(100);p__Bacteroidetes_unclassified(100);.43	12.9448	7.35915	1.72413	4.26834	1.96933e-05	0.000415681
k__Bacteria(100);p__Firmicutes(100);c__Clostridia(100);o__Clostridiales(100);f__Ruminococcaceae(100);f__Ruminococcaceae_unclassified(100);f__Ruminococcaceae_unclassified(100);.30	16.4609	7.39507	1.13575	6.5112	7.45539e-11	5.84503e-09
k__Bacteria(100);p__Firmicutes(100);p__Firmicutes_unclassified(100);p__Firmicutes_unclassified(100);p__Firmicutes_unclassified(100);p__Firmicutes_unclassified(100);p__Firmicutes_unclassified(100);.28	9.99981	7.4796	1.70185	4.39499	1.10779e-05	0.000262049
k__Bacteria(100);p__Actinobacteria(100);c__Actinobacteria(100);o__Actinomycetales(100);f__Microbacteriaceae(100);g__Candidatus_Rhodoluna(99);g__Candidatus_Rhodoluna_unclassified(99);	6.94743	7.49154	2.74886	2.72532	0.00642385	0.0477698
k__Bacteria(100);p__Actinobacteria(100);c__Actinobacteria(100);o__Actinomycetales(100);f__ACK-M1(100);f__ACK-M1_unclassified(100);f__ACK-M1_unclassified(100);	8.21252	7.73509	2.69184	2.87353	0.00405912	0.0330511
k__Bacteria(100);p__Spirochaetes(100);c__Spirochaetes(100);o__Spirochaetales(100);f__Spirochaetaceae(100);g__Treponema(100);g__Treponema_unclassified(100);.1	18.6425	7.73657	1.16527	6.63928	3.15219e-11	2.62109e-09
k__Bacteria(100);p__Bacteroidetes(100);c__Bacteroidia(100);o__Bacteroidales(100);o__Bacteroidales_unclassified(100);o__Bacteroidales_unclassified(100);o__Bacteroidales_unclassified(100);.23	14.3478	7.87913	1.47104	5.35618	8.5002e-08	3.70231e-06
k__Bacteria(100);p__Bacteroidetes(100);c__Bacteroidia(100);o__Bacteroidales(100);f__Rikenellaceae(100);g__Rikenella(100);g__Rikenella_unclassified(100);	9.41025	7.92927	2.84262	2.78942	0.00528028	0.0406997
k__Bacteria(100);p__Bacteroidetes(100);c__Cytophagia(100);o__Cytophagales(100);f__Cytophagaceae(100);f__Cytophagaceae_unclassified(100);f__Cytophagaceae_unclassified(100);	10.1763	8.04492	2.96642	2.712	0.00668783	0.0490093
k__Bacteria(100);p__Firmicutes(100);c__Clostridia(100);o__Clostridiales(100);o__Clostridiales_unclassified(100);o__Clostridiales_unclassified(100);o__Clostridiales_unclassified(100);.12	15.4703	8.04621	1.98775	4.0479	5.16784e-05	0.000932931
k__Bacteria(100);p__Proteobacteria(100);c__Betaproteobacteria(100);o__Burkholderiales(100);f__Comamonadaceae(100);f__Comamonadaceae_unclassified(100);f__Comamonadaceae_unclassified(100);	11.9835	8.1407	2.6361	3.08816	0.00201398	0.0182992
k__Bacteria(100);p__Bacteroidetes(100);c__Bacteroidia(100);o__Bacteroidales(100);o__Bacteroidales_unclassified(78);o__Bacteroidales_unclassified(78);o__Bacteroidales_unclassified(78);	97.8413	8.24529	1.27071	6.48871	8.65717e-11	6.59869e-09
k__Bacteria(100);p__Firmicutes(100);c__Clostridia(100);o__Clostridiales(100);f__Lachnospiraceae(100);f__Lachnospiraceae_unclassified(100);f__Lachnospiraceae_unclassified(100);.19	32.4234	8.29282	2.14245	3.87072	0.000108514	0.00175154
k__Bacteria(100);p__Proteobacteria(100);c__Alphaproteobacteria(100);o__RF32(100);o__RF32_unclassified(100);o__RF32_unclassified(100);o__RF32_unclassified(100);.2	12.9582	8.38655	2.65768	3.15559	0.00160175	0.0152611
k__Bacteria(100);p__Firmicutes(100);c__Clostridia(100);o__Clostridiales(100);f__Lachnospiraceae(100);f__Lachnospiraceae_unclassified(100);f__Lachnospiraceae_unclassified(100);.4	93.2465	8.44976	1.98138	4.26458	2.00275e-05	0.000419508
k__Bacteria(100);p__Bacteroidetes(100);c__Bacteroidia(100);o__Bacteroidales(100);f__Porphyromonadaceae(100);g__Parabacteroides(100);g__Parabacteroides_unclassified(100);.1	76.1228	8.54009	1.24459	6.86175	6.80234e-12	6.66629e-10
k__Bacteria(100);p__Firmicutes(100);c__Erysipelotrichi(100);o__Erysipelotrichales(100);f__Erysipelotrichaceae(100);g__Clostridium(100);g__Clostridium_unclassified(100);	32.9489	9.19616	1.70301	5.39996	6.66554e-08	3.04837e-06
k__Bacteria(100);p__Proteobacteria(100);c__Deltaproteobacteria(100);c__Deltaproteobacteria_unclassified(96);c__Deltaproteobacteria_unclassified(96);c__Deltaproteobacteria_unclassified(96);c__Deltaproteobacteria_unclassified(96);	46.2241	9.81184	1.69626	5.78441	7.27664e-09	3.91512e-07
k__Bacteria(100);p__Bacteroidetes(100);c__Bacteroidia(100);o__Bacteroidales(100);o__Bacteroidales_unclassified(100);o__Bacteroidales_unclassified(100);o__Bacteroidales_unclassified(100);.37	7.92864	14.9439	2.21294	6.75298	1.44843e-11	1.32483e-09
k__Bacteria(100);p__Firmicutes(100);c__Bacilli(100);o__Lactobacillales(100);f__Leuconostocaceae(100);g__Weissella(100);g__Weissella_unclassified(100);	5.40943	14.9461	2.61246	5.72106	1.0586e-08	5.48076e-07
k__Bacteria(100);p__Firmicutes(100);c__Clostridia(100);o__Clostridiales(100);f__Ruminococcaceae(100);g__Ruminococcus(100);g__Ruminococcus_unclassified(100);.9	10.6077	16.0288	1.76643	9.07414	1.14575e-19	1.65471e-17
k__Bacteria(100);p__Proteobacteria(100);c__Gammaproteobacteria(100);o__Pseudomonadales(100);f__Moraxellaceae(100);g__Acinetobacter(100);s__rhizosphaerae(100);	257.046	17.1449	2.34988	7.29607	2.96284e-13	3.38751e-11
k__Bacteria(100);p__Firmicutes(100);c__Clostridia(100);o__Clostridiales(100);f__Lachnospiraceae(100);f__Lachnospiraceae_unclassified(100);f__Lachnospiraceae_unclassified(100);.42	5.60535	18.2379	2.99577	6.08788	1.14414e-09	7.32597e-08

## Sheet: FL Lab T0 v T14
	baseMean	log2FoldChange	lfcSE	stat	pvalue	padj
k__Bacteria(100);p__Firmicutes(100);c__Clostridia(100);o__Clostridiales(100);f__Lachnospiraceae(100);f__Lachnospiraceae_unclassified(100);f__Lachnospiraceae_unclassified(100);.42	5.60535	-20.2869	3.23898	-6.26337	3.76744e-10	2.19152e-07		Total	20
k__Bacteria(100);p__Firmicutes(100);c__Clostridia(100);o__Clostridiales(100);f__Lachnospiraceae(100);f__Lachnospiraceae_unclassified(100);f__Lachnospiraceae_unclassified(100);.1	130.635	-8.38187	1.44392	-5.80495	6.43862e-09	1.96217e-06		Increase	8
k__Bacteria(100);p__Proteobacteria(100);c__Deltaproteobacteria(100);o__Desulfovibrionales(100);f__Desulfovibrionaceae(100);g__Desulfovibrio(100);s__cuneatus(100);.5	37.1819	-6.30288	1.29208	-4.87808	1.07124e-06	0.000186549		Decrease	12
k__Bacteria(100);p__Firmicutes(100);c__Clostridia(100);o__Clostridiales(100);f__Lachnospiraceae(100);f__Lachnospiraceae_unclassified(100);f__Lachnospiraceae_unclassified(100);.7	42.7204	-6.27824	1.49005	-4.21345	2.51502e-05	0.00383226
k__Bacteria(100);p__Bacteroidetes(100);p__Bacteroidetes_unclassified(100);p__Bacteroidetes_unclassified(100);p__Bacteroidetes_unclassified(100);p__Bacteroidetes_unclassified(100);p__Bacteroidetes_unclassified(100);.24	23.3454	-5.32308	1.588	-3.35208	0.00080208	0.0488868
k__Bacteria(100);p__Bacteroidetes(100);c__Bacteroidia(100);o__Bacteroidales(100);f__Porphyromonadaceae(100);g__Candidatus_Azobacteroides(100);g__Candidatus_Azobacteroides_unclassified(100);.14	40.6406	-5.26105	1.31296	-4.00702	6.14884e-05	0.00756344
k__Bacteria(100);p__Firmicutes(100);c__Clostridia(100);o__Clostridiales(100);f__Peptostreptococcaceae(100);f__Peptostreptococcaceae_unclassified(100);f__Peptostreptococcaceae_unclassified(100);.1	42.5893	-5.00712	1.41012	-3.55085	0.000383986	0.0332184
k__Bacteria(100);p__Firmicutes(100);c__Clostridia(100);o__Clostridiales(100);f__Lachnospiraceae(88);f__Lachnospiraceae_unclassified(62);f__Lachnospiraceae_unclassified(62);	17.3334	-4.90234	1.26091	-3.88795	0.000101095	0.0102696
k__Bacteria(100);p__Bacteroidetes(100);c__Bacteroidia(100);o__Bacteroidales(100);f__Porphyromonadaceae(100);g__Dysgonomonas(52);g__Dysgonomonas_unclassified(52);	30.3106	-3.71456	1.10726	-3.35473	0.000794413	0.0488868
k__Bacteria(100);p__Firmicutes(100);c__Clostridia(100);o__Clostridiales(100);o__Clostridiales_unclassified(99);o__Clostridiales_unclassified(99);o__Clostridiales_unclassified(99);	98.9004	-3.2014	0.799374	-4.00489	6.20463e-05	0.00756344
k__Bacteria(100);p__Firmicutes(100);c__Clostridia(100);o__Clostridiales(100);f__Ruminococcaceae(62);f__Ruminococcaceae_unclassified(62);f__Ruminococcaceae_unclassified(62);	14.8022	-2.90311	0.862567	-3.36566	0.000763612	0.0488868
k__Bacteria(100);p__Firmicutes(100);c__Clostridia(100);o__Clostridiales(100);f__Ruminococcaceae(100);f__Ruminococcaceae_unclassified(100);f__Ruminococcaceae_unclassified(100);.32	20.6115	-1.96009	0.569676	-3.4407	0.000580213	0.0442049
k__Bacteria(100);k__Bacteria_unclassified(100);k__Bacteria_unclassified(100);k__Bacteria_unclassified(100);k__Bacteria_unclassified(100);k__Bacteria_unclassified(100);k__Bacteria_unclassified(100);.27	12.3944	5.17691	0.926401	5.58819	2.29444e-08	5.59384e-06
k__Bacteria(100);p__Proteobacteria(100);c__Gammaproteobacteria(100);o__Pseudomonadales(100);f__Pseudomonadaceae(100);g__Pseudomonas(75);g__Pseudomonas_unclassified(65);	27.7795	5.54562	1.56906	3.53436	0.000408758	0.0332184
k__Bacteria(100);p__Proteobacteria(100);c__Gammaproteobacteria(100);o__Enterobacteriales(100);f__Enterobacteriaceae(100);f__Enterobacteriaceae_unclassified(93);f__Enterobacteriaceae_unclassified(93);	227.001	5.82032	1.48373	3.92277	8.75362e-05	0.00970061
k__Bacteria(100);p__Firmicutes(100);c__Bacilli(100);o__Lactobacillales(100);f__Streptococcaceae(100);g__Lactococcus(100);g__Lactococcus_unclassified(100);	9.61466	5.82776	1.70415	3.41975	0.000626798	0.0449451
k__Bacteria(100);p__Bacteroidetes(100);c__Bacteroidia(100);o__Bacteroidales(100);o__Bacteroidales_unclassified(100);o__Bacteroidales_unclassified(100);o__Bacteroidales_unclassified(100);.14	45.4931	8.039	2.1225	3.78753	0.000152155	0.0142675
k__Bacteria(100);p__Bacteroidetes(100);c__Bacteroidia(100);o__Bacteroidales(100);f__Porphyromonadaceae(100);g__Paludibacter(100);g__Paludibacter_unclassified(100);.6	47.2168	10.7742	1.73576	6.20721	5.39341e-10	2.19152e-07
k__Bacteria(100);p__Proteobacteria(100);c__Epsilonproteobacteria(100);o__Campylobacterales(100);f__Campylobacteraceae(100);g__Arcobacter(100);s__cryaerophilus(100);	53.518	11.5023	2.09421	5.49245	3.96387e-08	8.05327e-06
k__Bacteria(100);p__Elusimicrobia(100);c__Elusimicrobia(100);o__Elusimicrobiales(100);f__Elusimicrobiaceae(100);g__Elusimicrobium(100);s__minutum(100);.1	4.54416	19.0604	1.99057	9.57532	1.01538e-21	1.23775e-18

## Sheet: Lab v FL Lab T14
	baseMean	log2FoldChange	lfcSE	stat	pvalue	padj
k__Bacteria(100);p__Tenericutes(100);c__Mollicutes(100);o__Entomoplasmatales(100);f__Entomoplasmataceae(100);f__Entomoplasmataceae_unclassified(100);f__Entomoplasmataceae_unclassified(100);	63.4693	-24.9884	2.07454	-12.0453	2.05333e-33	5.26565e-31		Total	316
k__Bacteria(100);p__Bacteroidetes(100);p__Bacteroidetes_unclassified(100);p__Bacteroidetes_unclassified(100);p__Bacteroidetes_unclassified(100);p__Bacteroidetes_unclassified(100);p__Bacteroidetes_unclassified(100);.14	120.178	-24.512	1.4007	-17.4998	1.43658e-68	1.10521e-65		Increase	142
k__Bacteria(100);p__Firmicutes(100);c__Clostridia(100);o__Clostridiales(100);f__Ruminococcaceae(100);f__Ruminococcaceae_unclassified(100);f__Ruminococcaceae_unclassified(100);.56	18.281	-24.437	2.87458	-8.50106	1.87866e-17	2.55056e-15		Decrease	174
k__Bacteria(100);p__Bacteroidetes(100);c__Bacteroidia(100);o__Bacteroidales(100);o__Bacteroidales_unclassified(100);o__Bacteroidales_unclassified(100);o__Bacteroidales_unclassified(100);.12	61.946	-23.9913	1.5824	-15.1614	6.36837e-52	3.67455e-49
k__Bacteria(100);p__Firmicutes(100);c__Clostridia(100);o__Clostridiales(100);f__Veillonellaceae(100);g__Phascolarctobacterium(100);g__Phascolarctobacterium_unclassified(100);.1	41.2231	-23.8202	2.18572	-10.8981	1.17692e-27	2.2636e-25
k__Bacteria(100);p__Firmicutes(100);c__Clostridia(100);o__Clostridiales(100);f__Ruminococcaceae(100);f__Ruminococcaceae_unclassified(67);f__Ruminococcaceae_unclassified(67);	35.0176	-23.7638	2.49765	-9.51445	1.82668e-21	3.24306e-19
k__Bacteria(100);p__Bacteroidetes(100);c__Bacteroidia(100);o__Bacteroidales(100);f__Porphyromonadaceae(100);g__Candidatus_Azobacteroides(100);g__Candidatus_Azobacteroides_unclassified(100);.14	40.6406	-23.5129	1.30386	-18.0334	1.06571e-72	2.45965e-69
k__Bacteria(100);p__Firmicutes(100);c__Clostridia(100);o__Clostridiales(100);f__Ruminococcaceae(100);g__Ruminococcus(100);s__flavefaciens(100);	7.81549	-22.8241	5.80849	-3.92944	8.51455e-05	0.001346
k__Bacteria(100);p__Proteobacteria(100);c__Alphaproteobacteria(100);o__Rhodospirillales(100);f__Acetobacteraceae(100);f__Acetobacteraceae_unclassified(100);f__Acetobacteraceae_unclassified(100);	6.61853	-22.8039	3.86125	-5.90583	3.50871e-09	2.07643e-07
k__Bacteria(100);p__Firmicutes(100);c__Clostridia(100);o__Clostridiales(100);f__Lachnospiraceae(100);f__Lachnospiraceae_unclassified(92);f__Lachnospiraceae_unclassified(92);	60.1648	-22.605	1.2811	-17.645	1.11272e-69	1.28408e-66
k__Bacteria(100);p__Bacteroidetes(100);c__Bacteroidia(100);o__Bacteroidales(100);f__Porphyromonadaceae(100);g__Candidatus_Azobacteroides(100);g__Candidatus_Azobacteroides_unclassified(100);.23	25.001	-22.4251	3.83726	-5.84404	5.09498e-09	2.79981e-07
k__Bacteria(100);p__Firmicutes(100);c__Clostridia(100);o__Clostridiales(100);f__Ruminococcaceae(100);f__Ruminococcaceae_unclassified(100);f__Ruminococcaceae_unclassified(100);.14	11.381	-22.4027	4.41833	-5.0704	3.96991e-07	1.40962e-05
k__Bacteria(100);k__Bacteria_unclassified(100);k__Bacteria_unclassified(100);k__Bacteria_unclassified(100);k__Bacteria_unclassified(100);k__Bacteria_unclassified(100);k__Bacteria_unclassified(100);.155	6.40391	-22.3594	5.67336	-3.94113	8.10989e-05	0.00129087
k__Bacteria(100);p__Proteobacteria(100);c__Deltaproteobacteria(100);o__Desulfovibrionales(100);f__Desulfovibrionaceae(100);g__Desulfovibrio(100);g__Desulfovibrio_unclassified(80);	26.9084	-21.8994	1.5357	-14.2602	3.87615e-46	1.49103e-43
k__Bacteria(100);k__Bacteria_unclassified(100);k__Bacteria_unclassified(100);k__Bacteria_unclassified(100);k__Bacteria_unclassified(100);k__Bacteria_unclassified(100);k__Bacteria_unclassified(100);.18	26.0278	-21.8751	1.96951	-11.1069	1.16146e-28	2.68066e-26
k__Bacteria(100);p__Bacteroidetes(100);c__Bacteroidia(100);o__Bacteroidales(100);f__Porphyromonadaceae(100);g__Candidatus_Azobacteroides(100);g__Candidatus_Azobacteroides_unclassified(100);.17	32.9647	-21.8748	1.45747	-15.0088	6.43388e-51	2.96988e-48
k__Bacteria(100);p__Bacteroidetes(100);p__Bacteroidetes_unclassified(100);p__Bacteroidetes_unclassified(100);p__Bacteroidetes_unclassified(100);p__Bacteroidetes_unclassified(100);p__Bacteroidetes_unclassified(100);.23	27.5104	-21.6177	1.78695	-12.0976	1.08786e-33	3.13848e-31
k__Bacteria(100);p__Bacteroidetes(100);c__Bacteroidia(100);o__Bacteroidales(100);f__Porphyromonadaceae(100);g__Dysgonomonas(100);g__Dysgonomonas_unclassified(100);.2	89.1697	-21.5937	1.59738	-13.5182	1.2206e-41	4.0245e-39
k__Bacteria(100);p__Firmicutes(100);c__Erysipelotrichi(100);o__Erysipelotrichales(100);f__Erysipelotrichaceae(100);g__Clostridium(100);g__Clostridium_unclassified(100);.3	6.94843	-20.6448	3.22112	-6.4092	1.46281e-10	1.12539e-08
k__Bacteria(100);p__Bacteroidetes(100);p__Bacteroidetes_unclassified(100);p__Bacteroidetes_unclassified(100);p__Bacteroidetes_unclassified(100);p__Bacteroidetes_unclassified(100);p__Bacteroidetes_unclassified(100);.37	14.3953	-20.5277	1.86046	-11.0337	2.62942e-28	5.517e-26
k__Bacteria(100);p__Verrucomicrobia(100);c__Verruco-5(100);o__LD1-PB3(100);o__LD1-PB3_unclassified(100);o__LD1-PB3_unclassified(100);o__LD1-PB3_unclassified(100);.2	6.34259	-19.7372	4.25848	-4.63481	3.57268e-06	9.26489e-05
k__Bacteria(100);p__Bacteroidetes(100);c__Bacteroidia(100);o__Bacteroidales(100);f__Bacteroidaceae(98);g__Bacteroides(98);g__Bacteroides_unclassified(98);	12.2523	-18.684	2.06734	-9.03771	1.59993e-19	2.46176e-17
k__Bacteria(100);p__Bacteroidetes(100);c__Bacteroidia(100);o__Bacteroidales(100);o__Bacteroidales_unclassified(100);o__Bacteroidales_unclassified(100);o__Bacteroidales_unclassified(100);.20	43.9765	-18.1524	3.89297	-4.66287	3.11833e-06	8.36874e-05
k__Bacteria(100);p__Proteobacteria(100);c__Alphaproteobacteria(100);c__Alphaproteobacteria_unclassified(70);c__Alphaproteobacteria_unclassified(70);c__Alphaproteobacteria_unclassified(70);c__Alphaproteobacteria_unclassified(70);	7.24682	-16.2152	2.12355	-7.63592	2.24207e-14	2.46415e-12
k__Bacteria(100);p__Bacteroidetes(100);c__Bacteroidia(100);o__Bacteroidales(100);f__Bacteroidaceae(100);g__Bacteroides(100);g__Bacteroides_unclassified(100);	272.364	-13.6769	2.02446	-6.75584	1.42015e-11	1.26066e-09
k__Bacteria(100);p__Bacteroidetes(100);c__Bacteroidia(100);o__Bacteroidales(100);f__Porphyromonadaceae(100);g__Paludibacter(100);g__Paludibacter_unclassified(100);.5	62.156	-10.8678	1.54985	-7.01218	2.34641e-12	2.46159e-10
k__Bacteria(100);p__Proteobacteria(100);c__Betaproteobacteria(100);c__Betaproteobacteria_unclassified(100);c__Betaproteobacteria_unclassified(100);c__Betaproteobacteria_unclassified(100);c__Betaproteobacteria_unclassified(100);	87.2212	-10.6067	1.37279	-7.7264	1.1063e-14	1.27667e-12
k__Bacteria(100);p__Firmicutes(100);c__Bacilli(100);o__Lactobacillales(100);o__Lactobacillales_unclassified(99);o__Lactobacillales_unclassified(99);o__Lactobacillales_unclassified(99);.1	25.9061	-10.6015	2.3139	-4.58167	4.61281e-06	0.000115721
k__Bacteria(100);p__Firmicutes(100);c__Clostridia(100);o__Clostridiales(100);f__Ruminococcaceae(100);g__Ruminococcus(100);g__Ruminococcus_unclassified(100);.5	44.9904	-10.4347	2.61136	-3.99588	6.44537e-05	0.00106256
k__Bacteria(100);p__Bacteroidetes(100);c__Bacteroidia(100);o__Bacteroidales(100);f__Porphyromonadaceae(100);g__Candidatus_Azobacteroides(100);g__Candidatus_Azobacteroides_unclassified(100);.2	118.73	-10.4143	1.32133	-7.88167	3.23046e-15	3.92416e-13
k__Bacteria(100);p__Firmicutes(100);c__Clostridia(100);o__Clostridiales(100);f__Ruminococcaceae(100);f__Ruminococcaceae_unclassified(100);f__Ruminococcaceae_unclassified(100);.36	29.1949	-10.3505	3.14605	-3.28999	0.0010019	0.0107552
k__Bacteria(100);p__Bacteroidetes(100);c__Bacteroidia(100);o__Bacteroidales(100);f__Porphyromonadaceae(100);g__Candidatus_Azobacteroides(100);g__Candidatus_Azobacteroides_unclassified(100);.8	63.6239	-9.77917	1.06661	-9.16846	4.79818e-20	7.91014e-18
k__Bacteria(100);p__Bacteroidetes(100);p__Bacteroidetes_unclassified(100);p__Bacteroidetes_unclassified(100);p__Bacteroidetes_unclassified(100);p__Bacteroidetes_unclassified(100);p__Bacteroidetes_unclassified(100);.28	31.8503	-9.68276	1.56845	-6.17346	6.68122e-10	4.53537e-08
k__Bacteria(100);p__Bacteroidetes(100);c__Bacteroidia(100);o__Bacteroidales(100);o__Bacteroidales_unclassified(100);o__Bacteroidales_unclassified(100);o__Bacteroidales_unclassified(100);.26	29.2471	-9.55139	1.63825	-5.83023	5.53509e-09	2.97093e-07
k__Bacteria(100);p__Bacteroidetes(100);p__Bacteroidetes_unclassified(100);p__Bacteroidetes_unclassified(100);p__Bacteroidetes_unclassified(100);p__Bacteroidetes_unclassified(100);p__Bacteroidetes_unclassified(100);.36	30.6489	-9.45344	2.0973	-4.50744	6.5613e-06	0.000156118
k__Bacteria(100);p__Bacteroidetes(100);c__Bacteroidia(100);o__Bacteroidales(100);f__Porphyromonadaceae(100);g__Dysgonomonas(100);g__Dysgonomonas_unclassified(100);.10	31.5079	-9.03762	1.29885	-6.95816	3.44737e-12	3.31523e-10
k__Bacteria(100);p__Proteobacteria(100);c__Alphaproteobacteria(100);o__RF32(100);o__RF32_unclassified(100);o__RF32_unclassified(100);o__RF32_unclassified(100);.6	11.6958	-8.99255	1.93124	-4.65635	3.21857e-06	8.53847e-05
k__Bacteria(100);p__Bacteroidetes(100);c__Bacteroidia(100);o__Bacteroidales(100);o__Bacteroidales_unclassified(100);o__Bacteroidales_unclassified(100);o__Bacteroidales_unclassified(100);	468.77	-8.9269	1.49205	-5.98297	2.19103e-09	1.33076e-07
k__Bacteria(100);p__Firmicutes(100);c__Erysipelotrichi(100);o__Erysipelotrichales(100);f__Erysipelotrichaceae(100);f__Erysipelotrichaceae_unclassified(100);f__Erysipelotrichaceae_unclassified(100);.3	28.1193	-8.70631	1.68222	-5.17548	2.27328e-07	8.74454e-06
k__Bacteria(100);p__Bacteroidetes(100);p__Bacteroidetes_unclassified(100);p__Bacteroidetes_unclassified(100);p__Bacteroidetes_unclassified(100);p__Bacteroidetes_unclassified(100);p__Bacteroidetes_unclassified(100);.45	18.0156	-8.53318	1.52692	-5.58849	2.29053e-08	1.12479e-06
k__Bacteria(100);p__Bacteroidetes(100);c__Bacteroidia(100);o__Bacteroidales(100);o__Bacteroidales_unclassified(100);o__Bacteroidales_unclassified(100);o__Bacteroidales_unclassified(100);.18	30.6154	-8.4792	1.35393	-6.26265	3.78497e-10	2.72991e-08
k__Bacteria(100);k__Bacteria_unclassified(100);k__Bacteria_unclassified(100);k__Bacteria_unclassified(100);k__Bacteria_unclassified(100);k__Bacteria_unclassified(100);k__Bacteria_unclassified(100);.61	18.182	-8.45537	1.95714	-4.32026	1.55843e-05	0.000321147
k__Bacteria(100);p__Bacteroidetes(100);c__Bacteroidia(100);o__Bacteroidales(100);f__Rikenellaceae(100);f__Rikenellaceae_unclassified(100);f__Rikenellaceae_unclassified(100);.48	8.1712	-8.36917	1.69051	-4.95067	7.39597e-07	2.40421e-05
k__Bacteria(100);p__Verrucomicrobia(100);c__Verrucomicrobiae(100);o__Verrucomicrobiales(100);f__Verrucomicrobiaceae(100);f__Verrucomicrobiaceae_unclassified(100);f__Verrucomicrobiaceae_unclassified(100);.1	56.3448	-8.32383	1.92945	-4.31411	1.60249e-05	0.000327305
k__Bacteria(100);k__Bacteria_unclassified(100);k__Bacteria_unclassified(100);k__Bacteria_unclassified(100);k__Bacteria_unclassified(100);k__Bacteria_unclassified(100);k__Bacteria_unclassified(100);.29	27.6805	-8.29395	2.96639	-2.79597	0.00517439	0.0406207
k__Bacteria(100);p__Firmicutes(100);c__Clostridia(100);o__Clostridiales(100);o__Clostridiales_unclassified(79);o__Clostridiales_unclassified(79);o__Clostridiales_unclassified(79);	7.80624	-8.26666	1.41023	-5.86194	4.57481e-09	2.63966e-07
k__Bacteria(100);p__Firmicutes(100);c__Clostridia(100);o__Clostridiales(100);f__Ruminococcaceae(100);f__Ruminococcaceae_unclassified(100);f__Ruminococcaceae_unclassified(100);.81	7.67285	-8.08881	1.93626	-4.17754	2.94677e-05	0.000535523
k__Bacteria(100);p__Bacteroidetes(100);c__Bacteroidia(100);o__Bacteroidales(100);f__Porphyromonadaceae(100);g__Dysgonomonas(100);s__gadei(57);	17.0858	-8.05726	1.68317	-4.78696	1.69326e-06	4.94689e-05
k__Bacteria(100);p__Bacteroidetes(100);c__Bacteroidia(100);o__Bacteroidales(100);f__Porphyromonadaceae(100);f__Porphyromonadaceae_unclassified(79);f__Porphyromonadaceae_unclassified(79);	13.7958	-8.03258	1.31069	-6.12853	8.86919e-10	5.8486e-08
k__Bacteria(100);p__Bacteroidetes(100);c__Bacteroidia(100);o__Bacteroidales(100);f__Porphyromonadaceae(100);f__Porphyromonadaceae_unclassified(100);f__Porphyromonadaceae_unclassified(100);.21	13.5951	-7.98366	1.82262	-4.38032	1.18506e-05	0.000255618
k__Bacteria(100);p__Firmicutes(100);p__Firmicutes_unclassified(100);p__Firmicutes_unclassified(100);p__Firmicutes_unclassified(100);p__Firmicutes_unclassified(100);p__Firmicutes_unclassified(100);.40	6.98172	-7.93915	1.59596	-4.97452	6.54096e-07	2.1879e-05
k__Bacteria(100);p__Proteobacteria(100);c__Alphaproteobacteria(100);c__Alphaproteobacteria_unclassified(100);c__Alphaproteobacteria_unclassified(100);c__Alphaproteobacteria_unclassified(100);c__Alphaproteobacteria_unclassified(100);.1	12.2114	-7.92526	1.53096	-5.17665	2.25905e-07	8.74454e-06
k__Bacteria(100);p__Proteobacteria(100);c__Deltaproteobacteria(100);o__Desulfovibrionales(100);f__Desulfovibrionaceae(100);g__Desulfovibrio(100);s__cuneatus(100);.6	9.93039	-7.89587	2.21361	-3.56697	0.000361136	0.00450542
k__Bacteria(100);p__Bacteroidetes(100);c__Bacteroidia(100);o__Bacteroidales(100);f__Rikenellaceae(100);f__Rikenellaceae_unclassified(100);f__Rikenellaceae_unclassified(100);.28	20.9703	-7.83833	1.58971	-4.93068	8.19458e-07	2.62682e-05
k__Bacteria(100);p__Firmicutes(100);c__Clostridia(100);o__Clostridiales(100);f__Dehalobacteriaceae(100);g__Dehalobacterium(100);g__Dehalobacterium_unclassified(100);.3	13.6723	-7.80368	1.42831	-5.46356	4.66672e-08	2.11911e-06
k__Bacteria(100);p__Bacteroidetes(100);c__Bacteroidia(100);o__Bacteroidales(100);f__Porphyromonadaceae(100);g__Paludibacter(100);g__Paludibacter_unclassified(100);.14	15.4414	-7.76889	1.48911	-5.21713	1.81714e-07	7.23095e-06
k__Bacteria(100);p__Firmicutes(100);p__Firmicutes_unclassified(100);p__Firmicutes_unclassified(100);p__Firmicutes_unclassified(100);p__Firmicutes_unclassified(100);p__Firmicutes_unclassified(100);.63	5.45142	-7.64202	2.23468	-3.41974	0.000626816	0.00738108
k__Bacteria(100);p__Proteobacteria(100);c__Deltaproteobacteria(100);o__Desulfovibrionales(100);f__Desulfovibrionaceae(100);g__Desulfovibrio(100);g__Desulfovibrio_unclassified(100);.16	16.8718	-7.64095	1.67717	-4.55586	5.21712e-06	0.000129474
k__Bacteria(100);p__Bacteroidetes(100);c__Bacteroidia(100);o__Bacteroidales(100);f__Porphyromonadaceae(100);g__Dysgonomonas(100);g__Dysgonomonas_unclassified(100);.16	18.0343	-7.62574	1.71216	-4.45387	8.43356e-06	0.000192719
k__Bacteria(100);k__Bacteria_unclassified(100);k__Bacteria_unclassified(100);k__Bacteria_unclassified(100);k__Bacteria_unclassified(100);k__Bacteria_unclassified(100);k__Bacteria_unclassified(100);.28	25.1435	-7.49951	1.65809	-4.52298	6.09753e-06	0.000148138
k__Bacteria(100);p__Firmicutes(100);c__Clostridia(100);o__Clostridiales(100);f__Lachnospiraceae(100);f__Lachnospiraceae_unclassified(100);f__Lachnospiraceae_unclassified(100);.29	12.2453	-7.46771	1.69847	-4.39674	1.09891e-05	0.000242375
k__Bacteria(100);p__Firmicutes(100);c__Clostridia(100);o__Clostridiales(100);f__Ruminococcaceae(100);f__Ruminococcaceae_unclassified(100);f__Ruminococcaceae_unclassified(100);.50	12.4855	-7.43129	2.00302	-3.71005	0.000207221	0.00284682
k__Bacteria(100);p__Firmicutes(100);c__Clostridia(100);o__Clostridiales(100);f__Lachnospiraceae(100);f__Lachnospiraceae_unclassified(100);f__Lachnospiraceae_unclassified(100);.21	18.4164	-7.41647	1.69203	-4.38319	1.16952e-05	0.000254646
k__Bacteria(100);k__Bacteria_unclassified(100);k__Bacteria_unclassified(100);k__Bacteria_unclassified(100);k__Bacteria_unclassified(100);k__Bacteria_unclassified(100);k__Bacteria_unclassified(100);.126	4.97391	-7.40971	1.45246	-5.10148	3.37002e-07	1.2346e-05
k__Bacteria(100);p__Firmicutes(100);p__Firmicutes_unclassified(100);p__Firmicutes_unclassified(100);p__Firmicutes_unclassified(100);p__Firmicutes_unclassified(100);p__Firmicutes_unclassified(100);.22	13.289	-7.40888	1.59385	-4.64843	3.34475e-06	8.77236e-05
k__Bacteria(100);p__Bacteroidetes(100);c__Bacteroidia(100);o__Bacteroidales(100);o__Bacteroidales_unclassified(100);o__Bacteroidales_unclassified(100);o__Bacteroidales_unclassified(100);.44	5.42353	-7.3864	2.44351	-3.02287	0.00250393	0.0223995
k__Bacteria(100);p__Firmicutes(100);c__Erysipelotrichi(100);o__Erysipelotrichales(100);f__Erysipelotrichaceae(100);g__Clostridium(100);g__Clostridium_unclassified(100);.2	8.34575	-7.23693	2.21128	-3.27274	0.0010651	0.0112249
k__Bacteria(100);k__Bacteria_unclassified(100);k__Bacteria_unclassified(100);k__Bacteria_unclassified(100);k__Bacteria_unclassified(100);k__Bacteria_unclassified(100);k__Bacteria_unclassified(100);.111	5.24978	-7.22354	1.5463	-4.67149	2.99024e-06	8.16983e-05
k__Bacteria(100);p__Firmicutes(100);c__Clostridia(100);o__Clostridiales(100);f__Ruminococcaceae(100);f__Ruminococcaceae_unclassified(100);f__Ruminococcaceae_unclassified(100);.135	3.12167	-7.15099	1.835	-3.897	9.73903e-05	0.00150857
k__Bacteria(100);p__Lentisphaerae(100);c__[Lentisphaeria](100);o__Victivallales(100);f__Victivallaceae(100);f__Victivallaceae_unclassified(100);f__Victivallaceae_unclassified(100);.7	6.88071	-7.13064	1.63693	-4.3561	1.32403e-05	0.000282926
k__Bacteria(100);p__Firmicutes(100);c__Clostridia(100);o__Clostridiales(100);f__Ruminococcaceae(98);f__Ruminococcaceae_unclassified(98);f__Ruminococcaceae_unclassified(98);.1	3.60934	-6.96367	1.48826	-4.67907	2.8818e-06	8.01349e-05
k__Bacteria(100);p__Bacteroidetes(100);c__Bacteroidia(100);o__Bacteroidales(100);f__Porphyromonadaceae(100);g__Parabacteroides(98);g__Parabacteroides_unclassified(98);	5.18508	-6.90252	1.67092	-4.13097	3.61236e-05	0.000631616
k__Bacteria(100);p__Firmicutes(100);c__Clostridia(100);o__Clostridiales(100);o__Clostridiales_unclassified(99);o__Clostridiales_unclassified(99);o__Clostridiales_unclassified(99);.4	4.41643	-6.8714	1.99007	-3.45284	0.000554722	0.00663367
k__Bacteria(100);p__Spirochaetes(100);c__Spirochaetes(100);o__Spirochaetales(100);f__Spirochaetaceae(100);g__Treponema(100);g__Treponema_unclassified(100);.2	9.45792	-6.85773	1.5559	-4.40758	1.04534e-05	0.000236534
k__Bacteria(100);p__Bacteroidetes(100);p__Bacteroidetes_unclassified(100);p__Bacteroidetes_unclassified(100);p__Bacteroidetes_unclassified(100);p__Bacteroidetes_unclassified(100);p__Bacteroidetes_unclassified(100);.44	16.813	-6.82348	1.8614	-3.66579	0.00024658	0.00327072
k__Bacteria(100);p__Bacteroidetes(100);c__Bacteroidia(100);o__Bacteroidales(100);f__Rikenellaceae(100);f__Rikenellaceae_unclassified(100);f__Rikenellaceae_unclassified(100);.51	7.1676	-6.81087	2.04676	-3.32763	0.000875879	0.00953551
k__Bacteria(100);p__Bacteroidetes(100);c__Bacteroidia(100);o__Bacteroidales(100);f__Rikenellaceae(100);f__Rikenellaceae_unclassified(100);f__Rikenellaceae_unclassified(100);.38	12.1202	-6.73818	1.18294	-5.69615	1.22546e-08	6.1486e-07
k__Bacteria(100);p__Bacteroidetes(100);c__Bacteroidia(100);o__Bacteroidales(100);f__Rikenellaceae(100);f__Rikenellaceae_unclassified(100);f__Rikenellaceae_unclassified(100);.27	15.0511	-6.73729	1.21419	-5.54879	2.87648e-08	1.35488e-06
k__Bacteria(100);k__Bacteria_unclassified(100);k__Bacteria_unclassified(100);k__Bacteria_unclassified(100);k__Bacteria_unclassified(100);k__Bacteria_unclassified(100);k__Bacteria_unclassified(100);.23	26.6933	-6.70982	1.16428	-5.76309	8.25896e-09	4.3322e-07
k__Bacteria(100);p__Firmicutes(100);c__Clostridia(100);o__Clostridiales(100);o__Clostridiales_unclassified(100);o__Clostridiales_unclassified(100);o__Clostridiales_unclassified(100);.38	6.51767	-6.6752	2.14282	-3.11514	0.00183856	0.0174626
k__Bacteria(100);k__Bacteria_unclassified(100);k__Bacteria_unclassified(100);k__Bacteria_unclassified(100);k__Bacteria_unclassified(100);k__Bacteria_unclassified(100);k__Bacteria_unclassified(100);.91	5.70557	-6.65758	1.86043	-3.57851	0.000345555	0.00435815
k__Bacteria(100);p__Bacteroidetes(100);c__Bacteroidia(100);o__Bacteroidales(100);f__Porphyromonadaceae(100);g__Dysgonomonas(100);g__Dysgonomonas_unclassified(100);.26	11.0424	-6.61561	1.5201	-4.35209	1.34844e-05	0.000282926
k__Bacteria(100);p__Bacteroidetes(100);c__Bacteroidia(100);o__Bacteroidales(100);f__Porphyromonadaceae(100);f__Porphyromonadaceae_unclassified(84);f__Porphyromonadaceae_unclassified(84);	4.81921	-6.563	1.91184	-3.43281	0.000597351	0.00707019
k__Bacteria(100);p__Proteobacteria(100);c__Deltaproteobacteria(100);o__Desulfovibrionales(100);f__Desulfovibrionaceae(100);g__Desulfovibrio(100);g__Desulfovibrio_unclassified(78);	93.7149	-6.5363	0.973062	-6.71725	1.85185e-11	1.52645e-09
k__Bacteria(100);p__Bacteroidetes(100);c__Bacteroidia(100);o__Bacteroidales(100);f__Porphyromonadaceae(100);g__Paludibacter(100);g__Paludibacter_unclassified(100);.8	22.2992	-6.46552	1.27233	-5.08164	3.74183e-07	1.3494e-05
k__Bacteria(100);p__Firmicutes(100);c__Clostridia(100);o__Clostridiales(100);o__Clostridiales_unclassified(100);o__Clostridiales_unclassified(100);o__Clostridiales_unclassified(100);.35	5.7395	-6.43953	1.42541	-4.51769	6.25194e-06	0.000150307
k__Bacteria(100);p__Bacteroidetes(100);c__Bacteroidia(100);o__Bacteroidales(100);f__Porphyromonadaceae(100);g__Paludibacter(100);g__Paludibacter_unclassified(100);.18	7.06688	-6.42957	1.24701	-5.15601	2.52267e-07	9.5448e-06
k__Bacteria(100);k__Bacteria_unclassified(100);k__Bacteria_unclassified(100);k__Bacteria_unclassified(100);k__Bacteria_unclassified(100);k__Bacteria_unclassified(100);k__Bacteria_unclassified(100);.71	7.27864	-6.4235	1.15052	-5.58314	2.36212e-08	1.13579e-06
k__Bacteria(100);p__Bacteroidetes(100);c__Bacteroidia(100);o__Bacteroidales(100);f__Porphyromonadaceae(100);g__Candidatus_Azobacteroides(100);g__Candidatus_Azobacteroides_unclassified(100);.34	11.2095	-6.36054	1.6952	-3.75209	0.000175364	0.00246793
k__Bacteria(100);k__Bacteria_unclassified(100);k__Bacteria_unclassified(100);k__Bacteria_unclassified(100);k__Bacteria_unclassified(100);k__Bacteria_unclassified(100);k__Bacteria_unclassified(100);.120	3.97813	-6.20525	1.37739	-4.50508	6.63476e-06	0.000156255
k__Bacteria(100);k__Bacteria_unclassified(100);k__Bacteria_unclassified(100);k__Bacteria_unclassified(100);k__Bacteria_unclassified(100);k__Bacteria_unclassified(100);k__Bacteria_unclassified(100);.159	2.93851	-6.13231	2.18394	-2.80791	0.00498636	0.0395482
k__Bacteria(100);p__Bacteroidetes(100);c__Bacteroidia(100);o__Bacteroidales(100);o__Bacteroidales_unclassified(100);o__Bacteroidales_unclassified(100);o__Bacteroidales_unclassified(100);.54	3.52197	-6.13173	1.83835	-3.33546	0.000851582	0.00935929
k__Bacteria(100);p__Proteobacteria(100);c__Deltaproteobacteria(100);c__Deltaproteobacteria_unclassified(71);c__Deltaproteobacteria_unclassified(71);c__Deltaproteobacteria_unclassified(71);c__Deltaproteobacteria_unclassified(71);	5.58103	-6.00747	1.5526	-3.8693	0.000109147	0.00167941
k__Bacteria(100);p__Firmicutes(100);c__Clostridia(100);o__Clostridiales(100);f__Lachnospiraceae(100);g__Clostridium(100);s__colinum(98);	2.69736	-6.00015	1.55696	-3.85375	0.000116323	0.00176628
k__Bacteria(100);p__Bacteroidetes(100);p__Bacteroidetes_unclassified(100);p__Bacteroidetes_unclassified(100);p__Bacteroidetes_unclassified(100);p__Bacteroidetes_unclassified(100);p__Bacteroidetes_unclassified(100);.34	14.2185	-5.9572	1.76552	-3.37419	0.000740344	0.00833518
k__Bacteria(100);p__Bacteroidetes(100);c__Bacteroidia(100);o__Bacteroidales(100);o__Bacteroidales_unclassified(100);o__Bacteroidales_unclassified(100);o__Bacteroidales_unclassified(100);.65	3.43904	-5.957	1.88421	-3.16153	0.00156941	0.0154136
k__Bacteria(100);p__Proteobacteria(100);c__Gammaproteobacteria(100);o__Xanthomonadales(100);f__Xanthomonadaceae(100);g__Stenotrophomonas(100);s__geniculata(82);	27.7904	-5.87271	1.41262	-4.15731	3.22012e-05	0.000567331
k__Bacteria(100);p__Firmicutes(100);c__Clostridia(100);o__Clostridiales(100);o__Clostridiales_unclassified(99);o__Clostridiales_unclassified(99);o__Clostridiales_unclassified(99);.2	5.357	-5.84997	1.71693	-3.40723	0.00065626	0.00757324
k__Bacteria(100);p__Bacteroidetes(100);c__Bacteroidia(100);o__Bacteroidales(100);f__Porphyromonadaceae(100);g__Candidatus_Azobacteroides(100);g__Candidatus_Azobacteroides_unclassified(100);.46	4.43214	-5.8349	1.96849	-2.96415	0.00303523	0.0262371
k__Bacteria(100);p__Bacteroidetes(100);c__Bacteroidia(100);o__Bacteroidales(100);f__Porphyromonadaceae(100);f__Porphyromonadaceae_unclassified(68);f__Porphyromonadaceae_unclassified(68);	11.8289	-5.82647	1.74771	-3.33377	0.000856784	0.00937184
k__Bacteria(100);p__Firmicutes(100);p__Firmicutes_unclassified(100);p__Firmicutes_unclassified(100);p__Firmicutes_unclassified(100);p__Firmicutes_unclassified(100);p__Firmicutes_unclassified(100);.5	57.8456	-5.77426	0.85623	-6.74381	1.54283e-11	1.31883e-09
k__Bacteria(100);p__Bacteroidetes(100);c__Bacteroidia(100);o__Bacteroidales(100);f__Rikenellaceae(100);f__Rikenellaceae_unclassified(100);f__Rikenellaceae_unclassified(100);.72	2.97692	-5.76458	1.53993	-3.74341	0.00018154	0.00253936
k__Bacteria(100);p__Bacteroidetes(100);c__Bacteroidia(100);o__Bacteroidales(100);f__Rikenellaceae(100);f__Rikenellaceae_unclassified(100);f__Rikenellaceae_unclassified(100);.19	18.7428	-5.7505	1.09093	-5.27117	1.35558e-07	5.4889e-06
k__Bacteria(100);p__Bacteroidetes(100);c__Bacteroidia(100);o__Bacteroidales(100);f__Porphyromonadaceae(100);f__Porphyromonadaceae_unclassified(100);f__Porphyromonadaceae_unclassified(100);.8	38.4911	-5.61798	1.46773	-3.82766	0.000129368	0.00193884
k__Bacteria(100);p__Firmicutes(100);c__Erysipelotrichi(100);o__Erysipelotrichales(100);f__Erysipelotrichaceae(100);f__Erysipelotrichaceae_unclassified(100);f__Erysipelotrichaceae_unclassified(100);.4	32.9533	-5.6122	1.81808	-3.08688	0.00202269	0.0188241
k__Bacteria(100);p__Firmicutes(100);c__Clostridia(100);o__Clostridiales(100);f__Ruminococcaceae(99);f__Ruminococcaceae_unclassified(99);f__Ruminococcaceae_unclassified(99);.2	3.28149	-5.5206	1.97271	-2.79849	0.00513427	0.0404433
k__Bacteria(100);p__Bacteroidetes(100);c__Bacteroidia(100);o__Bacteroidales(100);f__Rikenellaceae(100);f__Rikenellaceae_unclassified(100);f__Rikenellaceae_unclassified(100);.45	6.68689	-5.49117	1.81868	-3.01932	0.00253341	0.0225758
k__Bacteria(100);k__Bacteria_unclassified(100);k__Bacteria_unclassified(100);k__Bacteria_unclassified(100);k__Bacteria_unclassified(100);k__Bacteria_unclassified(100);k__Bacteria_unclassified(100);.101	4.85589	-5.48402	1.45143	-3.77835	0.000157869	0.00227726
k__Bacteria(100);p__Bacteroidetes(100);c__Bacteroidia(100);o__Bacteroidales(100);f__Porphyromonadaceae(100);g__Candidatus_Azobacteroides(100);g__Candidatus_Azobacteroides_unclassified(100);.22	20.1547	-5.46185	1.08254	-5.04542	4.52524e-07	1.55884e-05
k__Bacteria(100);p__Proteobacteria(100);c__Alphaproteobacteria(100);o__RF32(100);o__RF32_unclassified(100);o__RF32_unclassified(100);o__RF32_unclassified(100);.13	3.83291	-5.38702	1.46574	-3.6753	0.00023757	0.00318786
k__Bacteria(100);p__Firmicutes(100);c__Clostridia(100);o__Clostridiales(100);f__Lachnospiraceae(100);g__Clostridium(100);s__colinum(58);	6.84055	-5.38627	1.78656	-3.01488	0.00257083	0.022821
k__Bacteria(100);p__Bacteroidetes(100);c__Bacteroidia(100);o__Bacteroidales(100);f__Porphyromonadaceae(100);g__Dysgonomonas(100);g__Dysgonomonas_unclassified(86);	32.8298	-5.3786	1.10043	-4.88771	1.02015e-06	3.13934e-05
k__Bacteria(100);p__Firmicutes(100);c__Clostridia(100);o__Clostridiales(100);f__Ruminococcaceae(100);f__Ruminococcaceae_unclassified(100);f__Ruminococcaceae_unclassified(100);.126	2.50732	-5.35362	1.35045	-3.96432	7.36066e-05	0.001188
k__Bacteria(100);p__Bacteroidetes(100);c__Bacteroidia(100);o__Bacteroidales(100);f__Rikenellaceae(100);f__Rikenellaceae_unclassified(100);f__Rikenellaceae_unclassified(100);.79	2.30071	-5.34146	1.4511	-3.68098	0.000232342	0.00315438
k__Bacteria(100);p__Firmicutes(100);c__Clostridia(100);o__Clostridiales(100);o__Clostridiales_unclassified(65);o__Clostridiales_unclassified(65);o__Clostridiales_unclassified(65);.1	1.66225	-5.30909	1.92542	-2.75736	0.00582694	0.0441317
k__Bacteria(100);p__Firmicutes(100);c__Clostridia(100);o__Clostridiales(100);o__Clostridiales_unclassified(100);o__Clostridiales_unclassified(100);o__Clostridiales_unclassified(100);.44	5.22318	-5.30817	1.51272	-3.50902	0.000449762	0.00549233
k__Bacteria(100);p__Bacteroidetes(100);c__Bacteroidia(100);o__Bacteroidales(100);f__Bacteroidaceae(100);g__Bacteroides(100);g__Bacteroides_unclassified(100);.3	24.6158	-5.27246	1.54383	-3.41518	0.000637407	0.00742998
k__Bacteria(100);p__Verrucomicrobia(100);c__Opitutae(100);o__[Cerasicoccales](100);f__[Cerasicoccaceae](100);f__[Cerasicoccaceae]_unclassified(100);f__[Cerasicoccaceae]_unclassified(100);.2	10.6898	-5.26311	1.93199	-2.72419	0.00644597	0.047744
k__Bacteria(100);p__Proteobacteria(100);p__Proteobacteria_unclassified(100);p__Proteobacteria_unclassified(100);p__Proteobacteria_unclassified(100);p__Proteobacteria_unclassified(100);p__Proteobacteria_unclassified(100);.15	11.2542	-5.20215	1.87121	-2.7801	0.0054342	0.0419469
k__Bacteria(100);p__Firmicutes(100);c__Clostridia(100);o__Clostridiales(100);f__Ruminococcaceae(100);f__Ruminococcaceae_unclassified(100);f__Ruminococcaceae_unclassified(100);.115	2.81789	-5.14644	1.72096	-2.99045	0.00278564	0.0243532
k__Bacteria(100);p__Tenericutes(100);c__Mollicutes(100);o__RF39(100);o__RF39_unclassified(100);o__RF39_unclassified(100);o__RF39_unclassified(100);.9	6.26216	-5.08421	1.51747	-3.35046	0.000806783	0.00895219
k__Bacteria(100);p__Bacteroidetes(100);c__Bacteroidia(100);o__Bacteroidales(100);f__Rikenellaceae(100);f__Rikenellaceae_unclassified(100);f__Rikenellaceae_unclassified(100);.42	7.40372	-5.07537	1.21049	-4.19283	2.75497e-05	0.00050464
k__Bacteria(100);p__Proteobacteria(100);p__Proteobacteria_unclassified(100);p__Proteobacteria_unclassified(100);p__Proteobacteria_unclassified(100);p__Proteobacteria_unclassified(100);p__Proteobacteria_unclassified(100);.25	14.3217	-4.94676	1.51664	-3.26165	0.00110767	0.0114056
k__Bacteria(100);k__Bacteria_unclassified(100);k__Bacteria_unclassified(100);k__Bacteria_unclassified(100);k__Bacteria_unclassified(100);k__Bacteria_unclassified(100);k__Bacteria_unclassified(100);.145	2.09768	-4.92816	1.13457	-4.34364	1.40143e-05	0.000291397
k__Bacteria(100);k__Bacteria_unclassified(100);k__Bacteria_unclassified(100);k__Bacteria_unclassified(100);k__Bacteria_unclassified(100);k__Bacteria_unclassified(100);k__Bacteria_unclassified(100);.123	3.81439	-4.92786	1.27509	-3.86471	0.00011122	0.00169997
k__Bacteria(100);p__Bacteroidetes(100);c__Bacteroidia(100);o__Bacteroidales(100);f__Rikenellaceae(100);f__Rikenellaceae_unclassified(100);f__Rikenellaceae_unclassified(100);.22	15.1424	-4.82751	1.1248	-4.29189	1.77155e-05	0.000352478
k__Bacteria(100);p__Firmicutes(100);c__Clostridia(100);o__Clostridiales(100);f__Ruminococcaceae(100);g__Clostridium(88);s__methylpentosum(88);	64.5774	-4.81859	1.53352	-3.14218	0.00167697	0.0162624
k__Bacteria(100);p__Firmicutes(100);c__Clostridia(100);o__Clostridiales(100);f__Veillonellaceae(100);f__Veillonellaceae_unclassified(100);f__Veillonellaceae_unclassified(100);.3	13.2628	-4.74879	0.776608	-6.11478	9.6689e-10	6.19884e-08
k__Bacteria(100);k__Bacteria_unclassified(100);k__Bacteria_unclassified(100);k__Bacteria_unclassified(100);k__Bacteria_unclassified(100);k__Bacteria_unclassified(100);k__Bacteria_unclassified(100);.64	6.31892	-4.70685	1.4357	-3.27844	0.00104384	0.0111022
k__Bacteria(100);p__Planctomycetes(100);c__vadinHA49(100);o__PeHg47(100);o__PeHg47_unclassified(100);o__PeHg47_unclassified(100);o__PeHg47_unclassified(100);.9	7.43168	-4.59971	1.04634	-4.396	1.10266e-05	0.000242375
k__Bacteria(100);p__Fibrobacteres(100);c__TG3(100);o__TG3-2(100);f__M2PB4-14(100);f__M2PB4-14_unclassified(100);f__M2PB4-14_unclassified(100);	78.0373	-4.57863	1.60207	-2.85794	0.004264	0.0348983
k__Bacteria(100);p__Firmicutes(100);c__Clostridia(100);o__Clostridiales(100);f__Ruminococcaceae(100);f__Ruminococcaceae_unclassified(100);f__Ruminococcaceae_unclassified(100);.8	61.3393	-4.55944	1.45895	-3.12515	0.00177714	0.0171617
k__Bacteria(100);p__Firmicutes(100);c__Clostridia(100);o__Clostridiales(100);f__Ruminococcaceae(99);f__Ruminococcaceae_unclassified(99);f__Ruminococcaceae_unclassified(99);.3	2.59108	-4.54311	1.24097	-3.66093	0.000251301	0.0033143
k__Bacteria(100);p__Firmicutes(100);p__Firmicutes_unclassified(100);p__Firmicutes_unclassified(100);p__Firmicutes_unclassified(100);p__Firmicutes_unclassified(100);p__Firmicutes_unclassified(100);.43	5.06117	-4.52961	1.3085	-3.46167	0.000536834	0.00645319
k__Bacteria(100);p__Proteobacteria(100);c__Alphaproteobacteria(100);o__RF32(100);o__RF32_unclassified(100);o__RF32_unclassified(100);o__RF32_unclassified(100);.5	7.55981	-4.49868	1.41668	-3.17551	0.00149575	0.0148802
k__Bacteria(100);p__Bacteroidetes(100);p__Bacteroidetes_unclassified(100);p__Bacteroidetes_unclassified(100);p__Bacteroidetes_unclassified(100);p__Bacteroidetes_unclassified(100);p__Bacteroidetes_unclassified(100);.20	34.7814	-4.44194	1.22809	-3.61694	0.000298112	0.00386541
k__Bacteria(100);p__Elusimicrobia(100);c__Endomicrobia(100);c__Endomicrobia_unclassified(100);c__Endomicrobia_unclassified(100);c__Endomicrobia_unclassified(100);c__Endomicrobia_unclassified(100);.10	2.12682	-4.43561	1.62235	-2.73407	0.00625565	0.0467251
k__Bacteria(100);p__Bacteroidetes(100);c__Bacteroidia(100);o__Bacteroidales(100);f__Rikenellaceae(100);f__Rikenellaceae_unclassified(100);f__Rikenellaceae_unclassified(100);.47	7.0039	-4.43472	1.32325	-3.35139	0.000804078	0.00895219
k__Bacteria(100);p__Firmicutes(100);c__Clostridia(100);o__Clostridiales(100);f__Ruminococcaceae(100);g__Ruminococcus(100);g__Ruminococcus_unclassified(100);.3	48.0348	-4.32381	0.906168	-4.77154	1.82825e-06	5.2094e-05
k__Bacteria(100);p__Actinobacteria(100);c__Acidimicrobiia(100);o__Acidimicrobiales(100);f__OCS155(100);f__OCS155_unclassified(100);f__OCS155_unclassified(100);	2.01936	-4.27287	1.07994	-3.95657	7.60324e-05	0.00121863
k__Bacteria(100);p__Proteobacteria(100);c__Alphaproteobacteria(100);o__Rickettsiales(100);f__Pelagibacteraceae(100);f__Pelagibacteraceae_unclassified(100);f__Pelagibacteraceae_unclassified(100);	3.25857	-4.25782	0.881325	-4.83116	1.35738e-06	4.12215e-05
k__Bacteria(100);p__Planctomycetes(100);c__Planctomycetia(100);o__Pirellulales(100);f__Pirellulaceae(100);f__Pirellulaceae_unclassified(100);f__Pirellulaceae_unclassified(100);.20	4.3396	-4.25413	1.42492	-2.98552	0.002831	0.0246564
k__Bacteria(100);p__Proteobacteria(100);c__Deltaproteobacteria(100);o__Desulfovibrionales(100);f__Desulfovibrionaceae(100);g__Desulfovibrio(100);g__Desulfovibrio_unclassified(99);	6.15964	-4.16464	1.16519	-3.57423	0.000351262	0.00440605
k__Bacteria(100);k__Bacteria_unclassified(100);k__Bacteria_unclassified(100);k__Bacteria_unclassified(100);k__Bacteria_unclassified(100);k__Bacteria_unclassified(100);k__Bacteria_unclassified(100);.132	3.43448	-3.99701	1.41321	-2.82831	0.00467941	0.0377625
k__Bacteria(100);k__Bacteria_unclassified(100);k__Bacteria_unclassified(100);k__Bacteria_unclassified(100);k__Bacteria_unclassified(100);k__Bacteria_unclassified(100);k__Bacteria_unclassified(100);.138	2.74729	-3.9647	1.24453	-3.18569	0.00144409	0.0144284
k__Bacteria(100);p__Bacteroidetes(100);p__Bacteroidetes_unclassified(100);p__Bacteroidetes_unclassified(100);p__Bacteroidetes_unclassified(100);p__Bacteroidetes_unclassified(100);p__Bacteroidetes_unclassified(100);.22	31.027	-3.94768	1.37815	-2.86448	0.00417691	0.0345531
k__Bacteria(100);k__Bacteria_unclassified(100);k__Bacteria_unclassified(100);k__Bacteria_unclassified(100);k__Bacteria_unclassified(100);k__Bacteria_unclassified(100);k__Bacteria_unclassified(100);.133	2.82961	-3.93479	1.04738	-3.7568	0.000172103	0.00244717
k__Bacteria(100);k__Bacteria_unclassified(100);k__Bacteria_unclassified(100);k__Bacteria_unclassified(100);k__Bacteria_unclassified(100);k__Bacteria_unclassified(100);k__Bacteria_unclassified(100);.62	10.6861	-3.8734	1.18248	-3.27565	0.0010542	0.011161
k__Bacteria(100);p__Firmicutes(100);c__Clostridia(100);o__Clostridiales(100);f__Ruminococcaceae(100);g__Ruminococcus(99);g__Ruminococcus_unclassified(99);.3	3.16235	-3.75582	1.16127	-3.23424	0.00121968	0.0123465
k__Bacteria(100);p__Elusimicrobia(100);c__Endomicrobia(100);c__Endomicrobia_unclassified(100);c__Endomicrobia_unclassified(100);c__Endomicrobia_unclassified(100);c__Endomicrobia_unclassified(100);.11	1.9389	-3.60632	1.30459	-2.76434	0.0057038	0.0437355
k__Bacteria(100);p__Proteobacteria(100);c__Deltaproteobacteria(100);o__Desulfarculales(100);f__Desulfarculaceae(100);f__Desulfarculaceae_unclassified(100);f__Desulfarculaceae_unclassified(100);.1	14.6684	-3.52748	0.885445	-3.98385	6.78072e-05	0.00110992
k__Bacteria(100);p__Proteobacteria(100);c__Alphaproteobacteria(100);o__Rickettsiales(100);f__Pelagibacteraceae(100);f__Pelagibacteraceae_unclassified(100);f__Pelagibacteraceae_unclassified(100);.1	1.29629	-3.46313	1.03556	-3.3442	0.000825209	0.00911283
k__Bacteria(100);p__Firmicutes(100);c__Clostridia(100);o__Clostridiales(100);o__Clostridiales_unclassified(80);o__Clostridiales_unclassified(80);o__Clostridiales_unclassified(80);	13.9908	-3.43473	0.984013	-3.49053	0.000482058	0.00585574
k__Bacteria(100);k__Bacteria_unclassified(100);k__Bacteria_unclassified(100);k__Bacteria_unclassified(100);k__Bacteria_unclassified(100);k__Bacteria_unclassified(100);k__Bacteria_unclassified(100);.53	11.062	-3.39382	1.04877	-3.236	0.00121215	0.0123245
k__Bacteria(100);p__Bacteroidetes(100);p__Bacteroidetes_unclassified(100);p__Bacteroidetes_unclassified(100);p__Bacteroidetes_unclassified(100);p__Bacteroidetes_unclassified(100);p__Bacteroidetes_unclassified(100);.27	27.2356	-3.3026	0.919327	-3.59241	0.000327633	0.00417777
k__Bacteria(100);k__Bacteria_unclassified(100);k__Bacteria_unclassified(100);k__Bacteria_unclassified(100);k__Bacteria_unclassified(100);k__Bacteria_unclassified(100);k__Bacteria_unclassified(100);.59	9.26094	-3.19258	0.74989	-4.2574	2.06819e-05	0.000397781
k__Bacteria(100);p__Firmicutes(100);c__Clostridia(100);o__Clostridiales(100);f__Dehalobacteriaceae(98);g__Dehalobacterium(98);g__Dehalobacterium_unclassified(98);	13.4663	-3.10733	0.824098	-3.77058	0.000162866	0.00233475
k__Bacteria(100);k__Bacteria_unclassified(100);k__Bacteria_unclassified(100);k__Bacteria_unclassified(100);k__Bacteria_unclassified(100);k__Bacteria_unclassified(100);k__Bacteria_unclassified(100);.113	3.76534	-3.04771	0.851543	-3.57904	0.000344858	0.00435815
k__Bacteria(100);k__Bacteria_unclassified(100);k__Bacteria_unclassified(100);k__Bacteria_unclassified(100);k__Bacteria_unclassified(100);k__Bacteria_unclassified(100);k__Bacteria_unclassified(100);.54	10.0603	-3.00938	0.985712	-3.053	0.00226566	0.0206686
k__Bacteria(100);p__Firmicutes(100);c__Clostridia(100);o__Clostridiales(100);o__Clostridiales_unclassified(68);o__Clostridiales_unclassified(68);o__Clostridiales_unclassified(68);.1	3.01947	-2.98681	1.097	-2.72271	0.00647481	0.047744
k__Bacteria(100);p__Firmicutes(100);c__Clostridia(100);o__Clostridiales(100);f__Ruminococcaceae(62);f__Ruminococcaceae_unclassified(62);f__Ruminococcaceae_unclassified(62);	14.8022	-2.94921	0.776126	-3.79991	0.000144747	0.00215533
k__Bacteria(100);p__Firmicutes(100);c__Clostridia(100);o__Clostridiales(100);f__[Mogibacteriaceae](100);f__[Mogibacteriaceae]_unclassified(100);f__[Mogibacteriaceae]_unclassified(100);.1	24.2751	-2.82104	0.938394	-3.00624	0.00264503	0.023221
k__Bacteria(100);p__Bacteroidetes(100);c__Bacteroidia(100);o__Bacteroidales(100);f__Rikenellaceae(100);f__Rikenellaceae_unclassified(100);f__Rikenellaceae_unclassified(100);.1	207.771	-2.71772	0.54627	-4.97506	6.52278e-07	2.1879e-05
k__Bacteria(100);p__Bacteroidetes(100);p__Bacteroidetes_unclassified(100);p__Bacteroidetes_unclassified(100);p__Bacteroidetes_unclassified(100);p__Bacteroidetes_unclassified(100);p__Bacteroidetes_unclassified(100);.16	100.179	-2.60608	0.789561	-3.30067	0.000964534	0.0104514
k__Bacteria(100);p__Proteobacteria(100);c__Deltaproteobacteria(100);o__Desulfovibrionales(100);f__Desulfovibrionaceae(100);g__Desulfovibrio(100);s__cuneatus(76);	151.547	-2.49814	0.702121	-3.55799	0.000373706	0.00463717
k__Bacteria(100);p__Proteobacteria(100);c__Deltaproteobacteria(100);o__Desulfovibrionales(99);o__Desulfovibrionales_unclassified(99);o__Desulfovibrionales_unclassified(99);o__Desulfovibrionales_unclassified(99);	2.3667	-2.42964	0.87266	-2.78418	0.00536638	0.0417274
k__Bacteria(100);k__Bacteria_unclassified(100);k__Bacteria_unclassified(100);k__Bacteria_unclassified(100);k__Bacteria_unclassified(100);k__Bacteria_unclassified(100);k__Bacteria_unclassified(100);.80	5.6084	-2.42518	0.893131	-2.71536	0.00662029	0.0486612
k__Bacteria(100);p__Proteobacteria(100);c__Betaproteobacteria(100);o__Nitrosomonadales(100);f__Nitrosomonadaceae(100);f__Nitrosomonadaceae_unclassified(95);f__Nitrosomonadaceae_unclassified(95);	4.86469	-2.38752	0.740061	-3.22612	0.00125482	0.0126468
k__Bacteria(100);p__Tenericutes(100);c__Mollicutes(100);o__RF39(100);o__RF39_unclassified(100);o__RF39_unclassified(100);o__RF39_unclassified(100);.5	9.39401	-2.27427	0.833462	-2.7287	0.00635837	0.0473391
k__Bacteria(100);p__Deferribacteres(100);c__Deferribacteres(100);o__Deferribacterales(100);f__Deferribacteraceae(100);f__Deferribacteraceae_unclassified(100);f__Deferribacteraceae_unclassified(100);.1	4.97024	-2.2646	0.819891	-2.76208	0.00574349	0.043894
k__Bacteria(100);p__Firmicutes(100);c__Clostridia(100);o__Clostridiales(100);f__Ruminococcaceae(100);f__Ruminococcaceae_unclassified(100);f__Ruminococcaceae_unclassified(100);.26	24.6047	-1.59049	0.529086	-3.00612	0.00264607	0.023221
k__Bacteria(100);p__Firmicutes(100);c__Clostridia(100);o__Clostridiales(100);f__Ruminococcaceae(100);f__Ruminococcaceae_unclassified(100);f__Ruminococcaceae_unclassified(100);.32	20.6115	-1.497	0.505491	-2.96148	0.00306166	0.0263668
k__Bacteria(100);p__Planctomycetes(100);c__vadinHA49(100);o__PeHg47(100);o__PeHg47_unclassified(100);o__PeHg47_unclassified(100);o__PeHg47_unclassified(100);	265.119	-1.17613	0.40505	-2.90366	0.0036883	0.0309549
k__Bacteria(100);p__Planctomycetes(100);c__vadinHA49(100);o__PeHg47(100);o__PeHg47_unclassified(100);o__PeHg47_unclassified(100);o__PeHg47_unclassified(100);.3	61.8881	-1.14884	0.378807	-3.03278	0.00242312	0.0219179
k__Bacteria(100);p__Proteobacteria(100);c__Deltaproteobacteria(100);o__Desulfobacterales(100);f__Desulfobacteraceae(100);f__Desulfobacteraceae_unclassified(100);f__Desulfobacteraceae_unclassified(100);.1	106.857	1.27346	0.390111	3.26435	0.00109716	0.0114056
k__Bacteria(100);p__Firmicutes(100);c__Clostridia(100);o__Clostridiales(100);o__Clostridiales_unclassified(75);o__Clostridiales_unclassified(75);o__Clostridiales_unclassified(75);	61.3536	1.30854	0.419602	3.11853	0.00181755	0.0173343
k__Bacteria(100);p__Firmicutes(100);c__Clostridia(100);o__Clostridiales(100);f__Ruminococcaceae(100);g__Anaerofilum(98);g__Anaerofilum_unclassified(98);	54.5802	1.44385	0.466187	3.09714	0.00195398	0.0183324
k__Bacteria(100);p__Synergistetes(100);c__Synergistia(100);o__Synergistales(100);f__Synergistaceae(100);g__Candidatus_Tammella(100);g__Candidatus_Tammella_unclassified(100);.1	72.0895	1.58983	0.524386	3.03179	0.0024311	0.0219179
k__Bacteria(100);p__Firmicutes(100);c__Clostridia(100);o__Clostridiales(100);f__Ruminococcaceae(100);f__Ruminococcaceae_unclassified(100);f__Ruminococcaceae_unclassified(100);.4	100.309	1.62716	0.447902	3.63285	0.000280307	0.00367584
k__Bacteria(100);p__Proteobacteria(100);c__Deltaproteobacteria(100);o__Desulfovibrionales(100);f__Desulfovibrionaceae(100);g__Desulfovibrio(100);g__Desulfovibrio_unclassified(100);.7	35.6949	1.74649	0.535276	3.26279	0.0011032	0.0114056
k__Bacteria(100);p__Deferribacteres(100);c__Deferribacteres(100);o__Deferribacterales(100);f__Deferribacteraceae(100);g__Mucispirillum(91);g__Mucispirillum_unclassified(91);	21.4246	1.78027	0.639681	2.78306	0.00538483	0.0417274
k__Bacteria(100);p__Spirochaetes(100);c__[Leptospirae](100);o__[Leptospirales](100);f__Sediment-4(100);g__SJA-88(100);g__SJA-88_unclassified(100);	28.3718	1.95779	0.7216	2.71312	0.0066653	0.0488249
k__Bacteria(100);p__Firmicutes(100);c__Clostridia(100);o__Clostridiales(100);f__Dehalobacteriaceae(100);g__Dehalobacterium(100);g__Dehalobacterium_unclassified(100);.1	9.02132	1.98694	0.713465	2.78492	0.00535416	0.0417274
k__Bacteria(100);p__Firmicutes(100);c__Clostridia(100);o__Clostridiales(100);f__Ruminococcaceae(100);f__Ruminococcaceae_unclassified(100);f__Ruminococcaceae_unclassified(100);.53	9.19193	2.00232	0.665308	3.00962	0.00261572	0.0231306
k__Bacteria(100);p__Bacteroidetes(100);p__Bacteroidetes_unclassified(100);p__Bacteroidetes_unclassified(100);p__Bacteroidetes_unclassified(100);p__Bacteroidetes_unclassified(100);p__Bacteroidetes_unclassified(100);.12	107.915	2.05747	0.725167	2.83723	0.00455063	0.0368521
k__Bacteria(100);p__Firmicutes(100);c__Clostridia(100);o__Clostridiales(100);f__Christensenellaceae(100);f__Christensenellaceae_unclassified(100);f__Christensenellaceae_unclassified(100);.6	13.8169	2.14355	0.630144	3.40168	0.000669724	0.00769016
k__Bacteria(100);p__Firmicutes(100);c__Clostridia(100);o__Clostridiales(100);f__Ruminococcaceae(100);f__Ruminococcaceae_unclassified(100);f__Ruminococcaceae_unclassified(100);.88	4.25617	2.15432	0.76555	2.81409	0.00489158	0.0390649
k__Bacteria(100);p__Proteobacteria(100);c__Deltaproteobacteria(100);o__Desulfarculales(100);f__Desulfarculaceae(100);f__Desulfarculaceae_unclassified(100);f__Desulfarculaceae_unclassified(100);	207.851	2.17364	0.430674	5.04707	4.48628e-07	1.55884e-05
k__Bacteria(100);p__Verrucomicrobia(100);c__Opitutae(100);o__Opitutales(100);f__Opitutaceae(100);g__Opitutus(100);g__Opitutus_unclassified(100);	31.8485	2.18808	0.487252	4.49065	7.10066e-06	0.000165539
k__Bacteria(100);p__Tenericutes(100);c__Mollicutes(100);o__Acholeplasmatales(100);f__Acholeplasmataceae(100);g__Acholeplasma(93);g__Acholeplasma_unclassified(93);	264.914	2.22788	0.559523	3.98175	6.84088e-05	0.00111188
k__Bacteria(100);p__Firmicutes(100);c__Clostridia(100);o__Clostridiales(100);f__Ruminococcaceae(100);f__Ruminococcaceae_unclassified(100);f__Ruminococcaceae_unclassified(100);.12	36.9866	2.31619	0.842937	2.74776	0.00600044	0.0452582
k__Bacteria(100);p__Proteobacteria(100);c__Deltaproteobacteria(100);o__Desulfovibrionales(100);f__Desulfovibrionaceae(100);g__Desulfovibrio(100);g__Desulfovibrio_unclassified(100);.6	35.9105	2.31757	0.713973	3.24602	0.00117032	0.0119518
k__Bacteria(100);p__Bacteroidetes(100);c__Bacteroidia(100);o__Bacteroidales(100);f__Porphyromonadaceae(100);g__Dysgonomonas(100);g__Dysgonomonas_unclassified(100);.3	76.4652	2.32678	0.828591	2.80811	0.00498327	0.0395482
k__Bacteria(100);p__Synergistetes(100);c__Synergistia(100);o__Synergistales(100);f__Synergistaceae(100);g__Candidatus_Tammella(100);g__Candidatus_Tammella_unclassified(100);.3	19.9881	2.36109	0.843212	2.80012	0.00510839	0.0403773
k__Bacteria(100);p__Proteobacteria(100);c__Deltaproteobacteria(100);o__Desulfovibrionales(98);o__Desulfovibrionales_unclassified(90);o__Desulfovibrionales_unclassified(90);o__Desulfovibrionales_unclassified(90);	32.5083	2.36808	0.522729	4.53023	5.89181e-06	0.000144663
k__Bacteria(100);p__Bacteroidetes(100);c__Bacteroidia(100);o__Bacteroidales(100);f__Rikenellaceae(100);f__Rikenellaceae_unclassified(100);f__Rikenellaceae_unclassified(100);.12	32.5503	2.38918	0.706475	3.38183	0.000720047	0.00814641
k__Bacteria(100);p__Firmicutes(100);c__Clostridia(100);o__Clostridiales(100);o__Clostridiales_unclassified(100);o__Clostridiales_unclassified(100);o__Clostridiales_unclassified(100);.9	15.5723	2.46928	0.877094	2.8153	0.00487315	0.0390528
k__Bacteria(100);p__Firmicutes(100);c__Clostridia(100);o__Clostridiales(100);f__Ruminococcaceae(100);f__Ruminococcaceae_unclassified(100);f__Ruminococcaceae_unclassified(100);.25	21.3895	2.50336	0.708818	3.53174	0.000412831	0.00506816
k__Bacteria(100);p__Verrucomicrobia(100);c__Verruco-5(100);o__LD1-PB3(100);o__LD1-PB3_unclassified(100);o__LD1-PB3_unclassified(100);o__LD1-PB3_unclassified(100);	43.7019	2.6107	0.905696	2.88254	0.00394488	0.0328693
k__Bacteria(100);k__Bacteria_unclassified(100);k__Bacteria_unclassified(100);k__Bacteria_unclassified(100);k__Bacteria_unclassified(100);k__Bacteria_unclassified(100);k__Bacteria_unclassified(100);.17	24.9044	2.62762	0.626221	4.19599	2.71683e-05	0.000501635
k__Bacteria(100);p__Spirochaetes(100);c__Spirochaetes(100);o__Spirochaetales(100);f__Spirochaetaceae(100);g__Treponema(100);g__Treponema_unclassified(100);	69.8678	2.72614	0.642873	4.24056	2.22967e-05	0.000421809
k__Bacteria(100);p__Bacteroidetes(100);c__Bacteroidia(100);o__Bacteroidales(100);f__Porphyromonadaceae(100);g__Parabacteroides(100);g__Parabacteroides_unclassified(100);	173.171	2.73529	0.850114	3.21755	0.0012929	0.0129739
k__Archaea(100);p__Euryarchaeota(100);c__Thermoplasmata(100);o__E2(100);f__[Methanomassiliicoccaceae](100);g__vadinCA11(100);g__vadinCA11_unclassified(100);	409.229	2.76235	0.992617	2.78289	0.00538767	0.0417274
k__Bacteria(100);p__Tenericutes(100);c__Mollicutes(100);o__Acholeplasmatales(100);f__Acholeplasmataceae(100);g__Acholeplasma(100);g__Acholeplasma_unclassified(100);	206.162	2.76749	0.73687	3.75574	0.000172829	0.00244717
k__Bacteria(100);p__Tenericutes(100);c__Mollicutes(100);o__Acholeplasmatales(100);f__Acholeplasmataceae(100);g__Acholeplasma(100);g__Acholeplasma_unclassified(100);.3	21.8206	2.77845	0.942674	2.94742	0.0032044	0.0272906
k__Bacteria(100);p__Proteobacteria(100);c__Deltaproteobacteria(100);o__Desulfovibrionales(100);f__Desulfovibrionaceae(100);g__Desulfovibrio(100);s__cuneatus(68);	87.0144	2.82516	0.766046	3.68798	0.000226044	0.00308703
k__Bacteria(100);p__Actinobacteria(100);c__Coriobacteriia(100);o__Coriobacteriales(100);f__Coriobacteriaceae(100);g__Enterococcus(100);s__casseliflavus(100);.3	7.68318	2.86832	0.772917	3.71103	0.000206414	0.00284682
k__Bacteria(100);p__Bacteroidetes(100);c__Bacteroidia(100);o__Bacteroidales(100);f__Rikenellaceae(100);f__Rikenellaceae_unclassified(100);f__Rikenellaceae_unclassified(100);.31	10.1861	2.86951	0.913084	3.14266	0.00167421	0.0162624
k__Bacteria(100);p__Bacteroidetes(100);c__Bacteroidia(100);o__Bacteroidales(100);o__Bacteroidales_unclassified(100);o__Bacteroidales_unclassified(100);o__Bacteroidales_unclassified(100);.25	13.2219	2.89013	1.02565	2.81785	0.0048346	0.0388789
k__Bacteria(100);p__Tenericutes(100);c__Mollicutes(100);o__Acholeplasmatales(100);f__Acholeplasmataceae(100);g__Acholeplasma(100);g__Acholeplasma_unclassified(100);.1	85.7608	2.96432	0.970678	3.05386	0.00225916	0.0206686
k__Bacteria(100);p__Bacteroidetes(100);c__Bacteroidia(100);o__Bacteroidales(100);f__Porphyromonadaceae(100);g__Dysgonomonas(100);g__Dysgonomonas_unclassified(100);.9	23.8776	2.98276	1.04334	2.85885	0.00425181	0.0348983
k__Bacteria(100);p__Bacteroidetes(100);c__Bacteroidia(100);o__Bacteroidales(100);f__Porphyromonadaceae(100);g__Candidatus_Azobacteroides(100);g__Candidatus_Azobacteroides_unclassified(100);.27	14.0139	2.99185	1.00495	2.97712	0.00290969	0.0252465
k__Bacteria(100);p__Bacteroidetes(100);c__Bacteroidia(100);o__Bacteroidales(100);f__Porphyromonadaceae(100);g__Tannerella(100);g__Tannerella_unclassified(100);	75.4641	2.99495	0.698206	4.28949	1.79082e-05	0.000353265
k__Bacteria(100);p__Firmicutes(100);c__Clostridia(100);o__Clostridiales(100);o__Clostridiales_unclassified(100);o__Clostridiales_unclassified(100);o__Clostridiales_unclassified(100);.5	37.7176	3.02211	0.753681	4.00979	6.07724e-05	0.00100908
k__Bacteria(100);p__Firmicutes(100);c__Clostridia(100);o__Clostridiales(100);f__Ruminococcaceae(100);f__Ruminococcaceae_unclassified(100);f__Ruminococcaceae_unclassified(100);.47	13.9374	3.02823	0.92798	3.26325	0.00110144	0.0114056
k__Bacteria(100);p__Firmicutes(100);c__Clostridia(100);o__Clostridiales(100);f__Ruminococcaceae(100);f__Ruminococcaceae_unclassified(100);f__Ruminococcaceae_unclassified(100);.104	2.72606	3.0365	0.986629	3.07766	0.00208636	0.0192613
k__Bacteria(100);p__Firmicutes(100);c__Clostridia(100);o__Clostridiales(100);f__Ruminococcaceae(100);f__Ruminococcaceae_unclassified(100);f__Ruminococcaceae_unclassified(100);.18	28.4815	3.03947	0.556378	5.46296	4.68261e-08	2.11911e-06
k__Bacteria(100);p__Proteobacteria(100);c__Deltaproteobacteria(100);o__Desulfovibrionales(100);f__Desulfovibrionaceae(100);g__Desulfovibrio(99);g__Desulfovibrio_unclassified(69);	13.429	3.06035	0.907566	3.37205	0.000746116	0.0083594
k__Bacteria(100);p__Firmicutes(100);c__Clostridia(100);o__Clostridiales(100);f__Syntrophomonadaceae(100);g__Syntrophomonas(100);g__Syntrophomonas_unclassified(100);	14.3403	3.06837	0.983471	3.11994	0.0018089	0.0173234
k__Bacteria(100);p__Spirochaetes(100);c__Spirochaetes(100);o__Spirochaetales(100);f__Spirochaetaceae(100);g__Treponema(100);g__Treponema_unclassified(100);.5	5.648	3.26548	1.1844	2.75708	0.00583196	0.0441317
k__Bacteria(100);p__Firmicutes(100);c__Clostridia(100);o__Clostridiales(100);f__Ruminococcaceae(100);f__Ruminococcaceae_unclassified(100);f__Ruminococcaceae_unclassified(100);.62	6.52117	3.33843	0.985933	3.38606	0.000709045	0.00806146
k__Bacteria(100);p__Proteobacteria(100);c__Deltaproteobacteria(100);o__Desulfovibrionales(100);f__Desulfovibrionaceae(100);g__Desulfovibrio(100);g__Desulfovibrio_unclassified(100);.17	6.71624	3.46766	1.27319	2.7236	0.00645744	0.047744
k__Bacteria(100);p__Bacteroidetes(100);c__Bacteroidia(100);o__Bacteroidales(100);o__Bacteroidales_unclassified(100);o__Bacteroidales_unclassified(100);o__Bacteroidales_unclassified(100);.3	275.122	3.48163	0.780319	4.4618	8.12728e-06	0.000187578
k__Bacteria(100);p__GN02(100);c__BD1-5(100);c__BD1-5_unclassified(100);c__BD1-5_unclassified(100);c__BD1-5_unclassified(100);c__BD1-5_unclassified(100);	2.85259	3.50079	1.27801	2.73925	0.006158	0.046145
k__Bacteria(100);p__Spirochaetes(100);c__Spirochaetes(100);o__Spirochaetales(100);f__Spirochaetaceae(100);g__za29(100);g__za29_unclassified(100);	3.27031	3.52172	0.975255	3.61108	0.000304929	0.00393171
k__Bacteria(100);p__Proteobacteria(100);c__Deltaproteobacteria(100);o__Desulfovibrionales(100);f__Desulfovibrionaceae(100);g__Desulfovibrio(100);s__cuneatus(52);	215.838	3.52796	0.997036	3.53845	0.000402486	0.00496758
k__Bacteria(100);k__Bacteria_unclassified(100);k__Bacteria_unclassified(100);k__Bacteria_unclassified(100);k__Bacteria_unclassified(100);k__Bacteria_unclassified(100);k__Bacteria_unclassified(100);.93	4.49032	3.59082	0.841006	4.26967	1.9576e-05	0.000379676
k__Bacteria(100);p__Proteobacteria(100);c__Deltaproteobacteria(100);o__Desulfobacterales(100);f__Desulfobulbaceae(100);g__Desulfobulbus(100);s__rhabdoformis(100);	106.765	3.7119	0.904652	4.10313	4.07604e-05	0.000707331
k__Bacteria(100);p__Firmicutes(100);c__Clostridia(100);o__Clostridiales(100);f__Veillonellaceae(100);f__Veillonellaceae_unclassified(100);f__Veillonellaceae_unclassified(100);	61.5497	3.77804	0.817206	4.62312	3.7801e-06	9.69385e-05
k__Bacteria(100);p__Proteobacteria(100);c__Alphaproteobacteria(100);c__Alphaproteobacteria_unclassified(100);c__Alphaproteobacteria_unclassified(100);c__Alphaproteobacteria_unclassified(100);c__Alphaproteobacteria_unclassified(100);.4	2.70896	3.8114	1.32199	2.88309	0.00393801	0.0328693
k__Bacteria(100);p__Firmicutes(100);c__Clostridia(100);o__Clostridiales(100);f__Ruminococcaceae(100);f__Ruminococcaceae_unclassified(55);f__Ruminococcaceae_unclassified(55);	16.6052	3.84783	1.1769	3.26946	0.00107754	0.0113043
k__Bacteria(100);p__Bacteroidetes(100);c__Bacteroidia(100);o__Bacteroidales(100);f__Porphyromonadaceae(100);g__Paludibacter(100);g__Paludibacter_unclassified(100);	100.925	3.94483	0.915318	4.30979	1.63407e-05	0.000327951
k__Bacteria(100);p__Bacteroidetes(100);c__Bacteroidia(100);o__Bacteroidales(100);o__Bacteroidales_unclassified(100);o__Bacteroidales_unclassified(100);o__Bacteroidales_unclassified(100);.45	3.89713	3.99563	1.08705	3.67566	0.000237233	0.00318786
k__Bacteria(100);p__Firmicutes(100);c__Clostridia(100);o__Clostridiales(100);o__Clostridiales_unclassified(100);o__Clostridiales_unclassified(100);o__Clostridiales_unclassified(100);.27	9.54303	4.02285	1.27443	3.15659	0.00159627	0.015611
k__Bacteria(100);p__Bacteroidetes(100);c__Bacteroidia(100);o__Bacteroidales(100);o__Bacteroidales_unclassified(100);o__Bacteroidales_unclassified(100);o__Bacteroidales_unclassified(100);.8	98.0083	4.05597	1.2345	3.2855	0.001018	0.0108775
k__Bacteria(100);p__Proteobacteria(100);p__Proteobacteria_unclassified(100);p__Proteobacteria_unclassified(100);p__Proteobacteria_unclassified(100);p__Proteobacteria_unclassified(100);p__Proteobacteria_unclassified(100);.27	4.84048	4.06516	1.18186	3.43963	0.000582511	0.00693008
k__Bacteria(100);p__Bacteroidetes(100);c__Bacteroidia(100);o__Bacteroidales(100);o__Bacteroidales_unclassified(100);o__Bacteroidales_unclassified(100);o__Bacteroidales_unclassified(100);.38	6.28411	4.06924	0.961165	4.23365	2.29927e-05	0.00043144
k__Bacteria(100);p__Firmicutes(100);c__Clostridia(100);o__Clostridiales(100);o__Clostridiales_unclassified(60);o__Clostridiales_unclassified(60);o__Clostridiales_unclassified(60);	3.28449	4.1237	1.21277	3.40022	0.000673321	0.00769319
k__Bacteria(100);p__Elusimicrobia(100);c__Endomicrobia(100);c__Endomicrobia_unclassified(100);c__Endomicrobia_unclassified(100);c__Endomicrobia_unclassified(100);c__Endomicrobia_unclassified(100);.2	31.7328	4.16524	1.34916	3.0873	0.00201986	0.0188241
k__Bacteria(100);k__Bacteria_unclassified(100);k__Bacteria_unclassified(100);k__Bacteria_unclassified(100);k__Bacteria_unclassified(100);k__Bacteria_unclassified(100);k__Bacteria_unclassified(100);.8	41.5997	4.2177	0.72136	5.84688	5.00878e-09	2.79981e-07
k__Bacteria(100);p__Proteobacteria(100);c__Betaproteobacteria(100);o__Nitrosomonadales(100);f__Nitrosomonadaceae(100);f__Nitrosomonadaceae_unclassified(100);f__Nitrosomonadaceae_unclassified(100);	3.6922	4.29417	1.05944	4.05325	5.05111e-05	0.000869998
k__Bacteria(100);p__Proteobacteria(100);c__Alphaproteobacteria(100);o__RF32(84);o__RF32_unclassified(84);o__RF32_unclassified(84);o__RF32_unclassified(84);	37.7815	4.30975	1.35971	3.1696	0.00152648	0.015056
k__Bacteria(100);p__Firmicutes(100);c__Clostridia(100);o__Clostridiales(100);o__Clostridiales_unclassified(100);o__Clostridiales_unclassified(100);o__Clostridiales_unclassified(100);.21	7.40371	4.34886	1.27567	3.40908	0.000651831	0.00755992
k__Bacteria(100);p__Firmicutes(100);c__Clostridia(100);o__Clostridiales(100);o__Clostridiales_unclassified(93);o__Clostridiales_unclassified(93);o__Clostridiales_unclassified(93);	6.11422	4.35178	1.33467	3.26057	0.0011119	0.0114056
k__Bacteria(100);p__Firmicutes(100);p__Firmicutes_unclassified(100);p__Firmicutes_unclassified(100);p__Firmicutes_unclassified(100);p__Firmicutes_unclassified(100);p__Firmicutes_unclassified(100);.9	26.968	4.35723	1.20169	3.62591	0.00028795	0.00375474
k__Bacteria(100);p__Firmicutes(100);c__Clostridia(100);o__Clostridiales(100);f__Ruminococcaceae(100);f__Ruminococcaceae_unclassified(100);f__Ruminococcaceae_unclassified(100);.130	2.4485	4.36314	1.47666	2.95472	0.00312949	0.0268508
k__Bacteria(100);p__Proteobacteria(100);p__Proteobacteria_unclassified(100);p__Proteobacteria_unclassified(100);p__Proteobacteria_unclassified(100);p__Proteobacteria_unclassified(100);p__Proteobacteria_unclassified(100);.38	3.2557	4.37672	1.48644	2.94442	0.00323559	0.027455
k__Bacteria(100);p__Proteobacteria(100);p__Proteobacteria_unclassified(100);p__Proteobacteria_unclassified(100);p__Proteobacteria_unclassified(100);p__Proteobacteria_unclassified(100);p__Proteobacteria_unclassified(100);.8	8.017	4.38657	1.40546	3.1211	0.00180178	0.0173234
k__Bacteria(100);p__Proteobacteria(100);c__Deltaproteobacteria(100);o__Desulfarculales(100);f__Desulfarculaceae(100);g__Desulfarculus(100);g__Desulfarculus_unclassified(100);.1	1.80396	4.41654	1.41962	3.11107	0.00186413	0.0176328
k__Bacteria(100);p__Proteobacteria(100);c__Deltaproteobacteria(100);o__Desulfovibrionales(100);f__Desulfovibrionaceae(100);g__Desulfovibrio(100);g__Desulfovibrio_unclassified(100);.24	2.69075	4.527	1.63979	2.76071	0.00576752	0.0439321
k__Bacteria(100);p__Proteobacteria(100);c__Deltaproteobacteria(100);o__Desulfovibrionales(100);f__Desulfovibrionaceae(100);g__Desulfovibrio(99);g__Desulfovibrio_unclassified(99);	4.71147	4.55782	1.18971	3.83103	0.000127606	0.00192493
k__Bacteria(100);p__Bacteroidetes(100);p__Bacteroidetes_unclassified(100);p__Bacteroidetes_unclassified(100);p__Bacteroidetes_unclassified(100);p__Bacteroidetes_unclassified(100);p__Bacteroidetes_unclassified(100);.31	15.3924	4.6456	1.15353	4.02729	5.64233e-05	0.00094366
k__Bacteria(100);p__Firmicutes(100);c__Clostridia(100);o__Clostridiales(100);f__Ruminococcaceae(100);f__Ruminococcaceae_unclassified(100);f__Ruminococcaceae_unclassified(100);.30	16.4609	4.67224	0.998507	4.67923	2.87959e-06	8.01349e-05
k__Bacteria(100);p__Proteobacteria(100);c__Deltaproteobacteria(100);o__Desulfovibrionales(100);f__Desulfovibrionaceae(100);g__Desulfovibrio(100);g__Desulfovibrio_unclassified(100);.13	6.20387	4.674	0.970481	4.81617	1.46338e-06	4.38635e-05
k__Bacteria(100);p__Bacteroidetes(100);p__Bacteroidetes_unclassified(100);p__Bacteroidetes_unclassified(100);p__Bacteroidetes_unclassified(100);p__Bacteroidetes_unclassified(100);p__Bacteroidetes_unclassified(100);.21	26.662	4.71178	1.13148	4.16425	3.12374e-05	0.000558883
k__Bacteria(100);p__Bacteroidetes(100);c__Bacteroidia(100);o__Bacteroidales(100);f__Porphyromonadaceae(100);g__Paludibacter(100);g__Paludibacter_unclassified(100);.6	47.2168	4.79352	1.62323	2.95308	0.00314616	0.0268938
k__Bacteria(100);p__Bacteroidetes(100);c__Bacteroidia(100);o__Bacteroidales(100);o__Bacteroidales_unclassified(95);o__Bacteroidales_unclassified(95);o__Bacteroidales_unclassified(95);	5.45586	4.84044	0.987121	4.90359	9.4101e-07	2.93493e-05
k__Bacteria(100);p__Proteobacteria(100);c__Deltaproteobacteria(100);o__Desulfovibrionales(100);f__Desulfovibrionaceae(99);g__Desulfovibrio(99);g__Desulfovibrio_unclassified(99);	2.83664	4.89027	1.29194	3.78522	0.000153571	0.00223465
k__Bacteria(100);p__Proteobacteria(100);c__Deltaproteobacteria(100);o__Spirobacillales(100);o__Spirobacillales_unclassified(100);o__Spirobacillales_unclassified(100);o__Spirobacillales_unclassified(100);	2.97895	4.89855	1.21118	4.04445	5.24466e-05	0.000896643
k__Bacteria(100);p__Tenericutes(100);c__Mollicutes(100);o__RF39(98);o__RF39_unclassified(98);o__RF39_unclassified(98);o__RF39_unclassified(98);	2.14821	4.96056	1.37764	3.60078	0.000317262	0.004068
k__Bacteria(100);p__Proteobacteria(100);c__Deltaproteobacteria(100);c__Deltaproteobacteria_unclassified(94);c__Deltaproteobacteria_unclassified(94);c__Deltaproteobacteria_unclassified(94);c__Deltaproteobacteria_unclassified(94);	16.0061	5.08103	1.48762	3.41555	0.00063653	0.00742998
k__Bacteria(100);p__Bacteroidetes(100);c__Bacteroidia(100);o__Bacteroidales(100);f__Rikenellaceae(100);f__Rikenellaceae_unclassified(100);f__Rikenellaceae_unclassified(100);.17	19.7043	5.14591	1.47936	3.47848	0.000504273	0.00609352
k__Bacteria(100);p__Elusimicrobia(100);c__Elusimicrobia(100);o__Elusimicrobiales(100);f__Elusimicrobiaceae(100);g__Elusimicrobium(100);s__minutum(84);	14.5784	5.18841	1.37092	3.78461	0.000153947	0.00223465
k__Bacteria(100);p__Bacteroidetes(100);c__Bacteroidia(100);o__Bacteroidales(100);f__Porphyromonadaceae(100);f__Porphyromonadaceae_unclassified(100);f__Porphyromonadaceae_unclassified(100);.25	3.30326	5.19212	1.81984	2.85307	0.00432997	0.0353129
k__Bacteria(100);p__Bacteroidetes(100);c__Bacteroidia(100);o__Bacteroidales(100);o__Bacteroidales_unclassified(100);o__Bacteroidales_unclassified(100);o__Bacteroidales_unclassified(100);.51	2.34886	5.19694	1.67693	3.09909	0.00194119	0.0182868
k__Bacteria(100);p__Firmicutes(100);c__Clostridia(100);o__Clostridiales(100);f__Ruminococcaceae(100);f__Ruminococcaceae_unclassified(100);f__Ruminococcaceae_unclassified(100);.103	2.16885	5.29226	1.93077	2.741	0.00612517	0.0460485
k__Bacteria(100);p__Firmicutes(100);p__Firmicutes_unclassified(100);p__Firmicutes_unclassified(100);p__Firmicutes_unclassified(100);p__Firmicutes_unclassified(100);p__Firmicutes_unclassified(100);.38	6.51272	5.35422	1.68827	3.17142	0.00151698	0.0150266
k__Bacteria(100);p__Bacteroidetes(100);p__Bacteroidetes_unclassified(100);p__Bacteroidetes_unclassified(100);p__Bacteroidetes_unclassified(100);p__Bacteroidetes_unclassified(100);p__Bacteroidetes_unclassified(100);.66	4.68408	5.43121	1.43332	3.78925	0.000151103	0.00223465
k__Bacteria(100);p__Tenericutes(100);c__Mollicutes(100);c__Mollicutes_unclassified(74);c__Mollicutes_unclassified(74);c__Mollicutes_unclassified(74);c__Mollicutes_unclassified(74);	2.12137	5.4703	1.46881	3.72429	0.000195863	0.0027232
k__Bacteria(100);p__Bacteroidetes(100);c__Bacteroidia(100);o__Bacteroidales(100);o__Bacteroidales_unclassified(100);o__Bacteroidales_unclassified(100);o__Bacteroidales_unclassified(100);.13	33.055	5.54058	1.18636	4.67022	3.00882e-06	8.16983e-05
k__Bacteria(100);p__Firmicutes(100);c__Clostridia(100);o__Clostridiales(100);f__Lachnospiraceae(100);f__Lachnospiraceae_unclassified(100);f__Lachnospiraceae_unclassified(100);.30	7.32899	5.60913	1.52809	3.67068	0.000241908	0.00322731
k__Bacteria(100);k__Bacteria_unclassified(100);k__Bacteria_unclassified(100);k__Bacteria_unclassified(100);k__Bacteria_unclassified(100);k__Bacteria_unclassified(100);k__Bacteria_unclassified(100);.49	10.5265	5.70157	1.07882	5.285	1.25708e-07	5.18094e-06
k__Bacteria(100);p__Bacteroidetes(100);c__Bacteroidia(100);o__Bacteroidales(100);o__Bacteroidales_unclassified(78);o__Bacteroidales_unclassified(78);o__Bacteroidales_unclassified(78);.1	10.8816	5.73013	1.99585	2.87103	0.0040914	0.0339675
k__Bacteria(100);p__Elusimicrobia(100);c__Elusimicrobia(100);o__Elusimicrobiales(100);f__Elusimicrobiaceae(100);f__Elusimicrobiaceae_unclassified(100);f__Elusimicrobiaceae_unclassified(100);.1	5.0644	5.94098	1.92996	3.0783	0.00208187	0.0192613
k__Bacteria(100);p__Proteobacteria(100);p__Proteobacteria_unclassified(100);p__Proteobacteria_unclassified(100);p__Proteobacteria_unclassified(100);p__Proteobacteria_unclassified(100);p__Proteobacteria_unclassified(100);.6	21.5167	6.01787	1.4886	4.04265	5.28514e-05	0.00089692
k__Bacteria(100);p__Proteobacteria(100);c__Deltaproteobacteria(100);o__Desulfovibrionales(100);f__Desulfovibrionaceae(100);g__Desulfovibrio(100);g__Desulfovibrio_unclassified(93);	71.0305	6.04418	1.05421	5.73339	9.84417e-09	5.04897e-07
k__Bacteria(100);p__Firmicutes(100);p__Firmicutes_unclassified(100);p__Firmicutes_unclassified(100);p__Firmicutes_unclassified(100);p__Firmicutes_unclassified(100);p__Firmicutes_unclassified(100);.25	8.87128	6.04723	1.40287	4.31062	1.62798e-05	0.000327951
k__Bacteria(100);p__Bacteroidetes(100);c__Bacteroidia(100);o__Bacteroidales(100);f__Porphyromonadaceae(100);g__Candidatus_Azobacteroides(100);g__Candidatus_Azobacteroides_unclassified(100);.25	19.3605	6.11639	1.3908	4.39774	1.09384e-05	0.000242375
k__Bacteria(100);p__Bacteroidetes(100);c__Bacteroidia(100);o__Bacteroidales(100);f__Porphyromonadaceae(100);g__Dysgonomonas(100);s__gadei(100);	3.40278	6.11929	2.02187	3.02655	0.00247364	0.0222147
k__Bacteria(100);p__Bacteroidetes(100);c__Bacteroidia(100);o__Bacteroidales(100);o__Bacteroidales_unclassified(100);o__Bacteroidales_unclassified(100);o__Bacteroidales_unclassified(100);.16	22.8074	6.12415	1.56782	3.90617	9.37721e-05	0.00147229
k__Bacteria(100);p__Firmicutes(100);c__Bacilli(100);o__Bacillales(100);f__Staphylococcaceae(100);g__Staphylococcus(100);g__Staphylococcus_unclassified(99);	4.11475	6.27889	1.65833	3.78627	0.000152926	0.00223465
k__Bacteria(100);p__Lentisphaerae(100);c__[Lentisphaeria](100);o__Victivallales(100);f__Victivallaceae(100);f__Victivallaceae_unclassified(100);f__Victivallaceae_unclassified(100);.4	8.35584	6.45613	1.26328	5.11062	3.21109e-07	1.19535e-05
k__Bacteria(100);p__Bacteroidetes(100);c__Bacteroidia(100);o__Bacteroidales(100);f__Porphyromonadaceae(100);g__Dysgonomonas(100);g__Dysgonomonas_unclassified(100);.29	6.80839	6.47858	1.5126	4.28308	1.84321e-05	0.000360519
k__Archaea(100);p__Euryarchaeota(100);c__Methanobacteria(100);o__Methanobacteriales(100);f__Methanobacteriaceae(100);g__Methanobrevibacter(100);g__Methanobrevibacter_unclassified(100);.1	9.19078	6.54865	1.37141	4.77512	1.79599e-06	5.18142e-05
k__Bacteria(100);p__Proteobacteria(100);c__Deltaproteobacteria(100);o__Desulfovibrionales(100);f__Desulfovibrionaceae(100);f__Desulfovibrionaceae_unclassified(100);f__Desulfovibrionaceae_unclassified(100);.3	8.17752	6.56672	2.30438	2.84967	0.00437642	0.0355661
k__Bacteria(100);p__Firmicutes(100);p__Firmicutes_unclassified(100);p__Firmicutes_unclassified(100);p__Firmicutes_unclassified(100);p__Firmicutes_unclassified(100);p__Firmicutes_unclassified(100);.53	4.64786	6.63683	2.17852	3.04648	0.00231537	0.0210389
k__Bacteria(100);k__Bacteria_unclassified(100);k__Bacteria_unclassified(100);k__Bacteria_unclassified(100);k__Bacteria_unclassified(100);k__Bacteria_unclassified(100);k__Bacteria_unclassified(100);.116	5.17416	6.71888	2.31223	2.9058	0.00366314	0.0308559
k__Bacteria(100);p__Firmicutes(100);c__Clostridia(100);o__Clostridiales(100);o__Clostridiales_unclassified(100);o__Clostridiales_unclassified(100);o__Clostridiales_unclassified(100);.14	13.5048	6.84252	1.57221	4.35217	1.34798e-05	0.000282926
k__Bacteria(100);p__Bacteroidetes(100);c__Bacteroidia(100);o__Bacteroidales(100);o__Bacteroidales_unclassified(100);o__Bacteroidales_unclassified(100);o__Bacteroidales_unclassified(100);.28	11.8284	6.86325	1.42738	4.80829	1.52226e-06	4.50432e-05
k__Bacteria(100);p__Bacteroidetes(100);c__Bacteroidia(100);o__Bacteroidales(100);o__Bacteroidales_unclassified(100);o__Bacteroidales_unclassified(100);o__Bacteroidales_unclassified(100);.21	20.2937	6.86828	1.39518	4.92286	8.52899e-07	2.69656e-05
k__Bacteria(100);p__Proteobacteria(100);c__Deltaproteobacteria(100);o__Desulfovibrionales(100);f__Desulfovibrionaceae(99);f__Desulfovibrionaceae_unclassified(98);f__Desulfovibrionaceae_unclassified(98);	11.1726	6.91186	1.13264	6.10246	1.0445e-09	6.51541e-08
k__Bacteria(100);k__Bacteria_unclassified(100);k__Bacteria_unclassified(100);k__Bacteria_unclassified(100);k__Bacteria_unclassified(100);k__Bacteria_unclassified(100);k__Bacteria_unclassified(100);.60	6.48502	6.94148	1.30412	5.32274	1.02214e-07	4.28926e-06
k__Bacteria(100);p__Firmicutes(100);p__Firmicutes_unclassified(100);p__Firmicutes_unclassified(100);p__Firmicutes_unclassified(100);p__Firmicutes_unclassified(100);p__Firmicutes_unclassified(100);.28	9.99981	7.08271	1.70185	4.16178	3.1578e-05	0.000560632
k__Bacteria(100);p__Proteobacteria(100);c__Deltaproteobacteria(100);o__Desulfobacterales(100);f__Desulfobacteraceae(100);g__Desulfosarcina(100);g__Desulfosarcina_unclassified(100);	82.5607	7.14474	1.71457	4.16709	3.08518e-05	0.000556297
k__Bacteria(100);p__Verrucomicrobia(100);c__Opitutae(100);o__[Cerasicoccales](100);f__[Cerasicoccaceae](100);f__[Cerasicoccaceae]_unclassified(100);f__[Cerasicoccaceae]_unclassified(100);.3	5.79162	7.17823	2.4691	2.90723	0.00364651	0.0308283
k__Bacteria(100);p__Proteobacteria(100);p__Proteobacteria_unclassified(100);p__Proteobacteria_unclassified(100);p__Proteobacteria_unclassified(100);p__Proteobacteria_unclassified(100);p__Proteobacteria_unclassified(100);.13	13.5033	7.28877	1.86727	3.90344	9.48358e-05	0.00147893
k__Bacteria(100);p__Bacteroidetes(100);p__Bacteroidetes_unclassified(100);p__Bacteroidetes_unclassified(100);p__Bacteroidetes_unclassified(100);p__Bacteroidetes_unclassified(100);p__Bacteroidetes_unclassified(100);.43	12.9448	7.32294	1.72413	4.24733	2.1633e-05	0.000412635
k__Bacteria(100);p__Bacteroidetes(100);c__Bacteroidia(100);o__Bacteroidales(100);f__Porphyromonadaceae(100);g__Parabacteroides(100);g__Parabacteroides_unclassified(100);.1	76.1228	7.35142	1.18996	6.17787	6.49736e-10	4.53537e-08
k__Bacteria(100);p__Bacteroidetes(100);p__Bacteroidetes_unclassified(100);p__Bacteroidetes_unclassified(100);p__Bacteroidetes_unclassified(100);p__Bacteroidetes_unclassified(100);p__Bacteroidetes_unclassified(100);.33	13.6007	7.37037	2.23688	3.29494	0.000984428	0.0106171
k__Bacteria(100);p__Bacteroidetes(100);c__Bacteroidia(100);o__Bacteroidales(100);f__Porphyromonadaceae(100);g__Dysgonomonas(100);g__Dysgonomonas_unclassified(100);.7	69.0424	7.3848	1.82819	4.03941	5.35855e-05	0.00090274
k__Bacteria(100);p__Actinobacteria(100);c__Actinobacteria(100);o__Actinomycetales(100);f__Microbacteriaceae(100);g__Candidatus_Rhodoluna(99);g__Candidatus_Rhodoluna_unclassified(99);	6.94743	7.45532	2.74886	2.71215	0.00668487	0.0488249
k__Bacteria(100);p__Proteobacteria(100);c__Deltaproteobacteria(100);c__Deltaproteobacteria_unclassified(96);c__Deltaproteobacteria_unclassified(96);c__Deltaproteobacteria_unclassified(96);c__Deltaproteobacteria_unclassified(96);	46.2241	7.50393	1.63257	4.59638	4.29894e-06	0.000109032
k__Bacteria(100);p__Actinobacteria(100);c__Actinobacteria(100);o__Actinomycetales(100);f__ACK-M1(100);f__ACK-M1_unclassified(100);f__ACK-M1_unclassified(100);	8.21252	7.69887	2.69184	2.86008	0.00423539	0.0348983
k__Bacteria(100);p__Spirochaetes(100);c__Spirochaetes(100);o__Spirochaetales(100);f__Spirochaetaceae(100);g__Treponema(100);g__Treponema_unclassified(100);.1	18.6425	7.70035	1.16527	6.6082	3.8902e-11	3.09607e-09
k__Bacteria(100);p__Bacteroidetes(100);c__Bacteroidia(100);o__Bacteroidales(100);o__Bacteroidales_unclassified(100);o__Bacteroidales_unclassified(100);o__Bacteroidales_unclassified(100);.23	14.3478	7.84292	1.47104	5.33156	9.7375e-08	4.16188e-06
k__Bacteria(100);p__Bacteroidetes(100);c__Bacteroidia(100);o__Bacteroidales(100);f__Rikenellaceae(100);g__Rikenella(100);g__Rikenella_unclassified(100);	9.41025	7.89305	2.84262	2.77668	0.00549176	0.0422499
k__Bacteria(100);p__Proteobacteria(100);c__Betaproteobacteria(100);o__Burkholderiales(100);f__Comamonadaceae(100);f__Comamonadaceae_unclassified(100);f__Comamonadaceae_unclassified(100);	11.9835	8.10449	2.6361	3.07442	0.00210909	0.0193936
k__Bacteria(100);p__Firmicutes(100);c__Clostridia(100);o__Clostridiales(100);o__Clostridiales_unclassified(100);o__Clostridiales_unclassified(100);o__Clostridiales_unclassified(100);.12	15.4703	8.37067	1.98775	4.21113	2.54094e-05	0.000472944
k__Bacteria(100);p__Bacteroidetes(100);p__Bacteroidetes_unclassified(100);p__Bacteroidetes_unclassified(100);p__Bacteroidetes_unclassified(100);p__Bacteroidetes_unclassified(100);p__Bacteroidetes_unclassified(100);.8	187.456	8.57429	1.04189	8.22954	1.87941e-16	2.40982e-14
k__Bacteria(100);p__Firmicutes(100);c__Erysipelotrichi(100);o__Erysipelotrichales(100);f__Erysipelotrichaceae(100);g__Clostridium(100);g__Clostridium_unclassified(100);	32.9489	9.15995	1.70301	5.37869	7.50278e-08	3.26725e-06
k__Bacteria(100);p__Bacteroidetes(100);c__Bacteroidia(100);o__Bacteroidales(100);o__Bacteroidales_unclassified(78);o__Bacteroidales_unclassified(78);o__Bacteroidales_unclassified(78);	97.8413	9.17032	1.31687	6.96374	3.31353e-12	3.31523e-10
k__Bacteria(100);p__Bacteroidetes(100);c__Bacteroidia(100);o__Bacteroidales(100);o__Bacteroidales_unclassified(100);o__Bacteroidales_unclassified(100);o__Bacteroidales_unclassified(100);.14	45.4931	9.72773	1.95804	4.96809	6.76152e-07	2.22937e-05
k__Bacteria(100);p__Firmicutes(100);c__Bacilli(100);o__Lactobacillales(100);f__Leuconostocaceae(100);g__Weissella(100);g__Weissella_unclassified(100);	5.40943	14.0999	2.61246	5.39715	6.77088e-08	3.00523e-06
k__Bacteria(100);p__Bacteroidetes(100);c__Bacteroidia(100);o__Bacteroidales(100);o__Bacteroidales_unclassified(100);o__Bacteroidales_unclassified(100);o__Bacteroidales_unclassified(100);.37	7.92864	14.1563	2.21294	6.39708	1.58381e-10	1.17917e-08
k__Bacteria(100);p__Firmicutes(100);c__Clostridia(100);o__Clostridiales(100);f__Ruminococcaceae(100);g__Ruminococcus(100);g__Ruminococcus_unclassified(100);.9	10.6077	15.2078	1.76643	8.60935	7.34771e-18	1.05991e-15
k__Bacteria(100);p__Proteobacteria(100);c__Gammaproteobacteria(100);o__Pseudomonadales(100);f__Moraxellaceae(100);g__Acinetobacter(100);s__rhizosphaerae(100);	257.046	16.1356	2.34988	6.86656	6.57704e-12	6.07192e-10

## Sheet: Lab v Wild P. americana T0
	baseMean	log2FoldChange	lfcSE	stat	pvalue	padj
k__Bacteria(100);p__Bacteroidetes(100);c__Flavobacteriia(100);o__Flavobacteriales(100);f__[Weeksellaceae](100);g__Chryseobacterium(100);g__Chryseobacterium_unclassified(100);	58.4134	-25.763	2.59042	-9.94549	2.6387e-23	3.02978e-21		Total	770
k__Bacteria(100);k__Bacteria_unclassified(100);k__Bacteria_unclassified(100);k__Bacteria_unclassified(100);k__Bacteria_unclassified(100);k__Bacteria_unclassified(100);k__Bacteria_unclassified(100);.9	39.3329	-24.8888	3.27677	-7.59552	3.06562e-14	1.80087e-12		Increase	325
k__Bacteria(100);p__Bacteroidetes(100);p__Bacteroidetes_unclassified(100);p__Bacteroidetes_unclassified(100);p__Bacteroidetes_unclassified(100);p__Bacteroidetes_unclassified(100);p__Bacteroidetes_unclassified(100);.15	67.8746	-24.0558	1.63268	-14.734	3.90126e-49	1.08255e-46		Decrease	445
k__Bacteria(100);p__Bacteroidetes(100);p__Bacteroidetes_unclassified(100);p__Bacteroidetes_unclassified(100);p__Bacteroidetes_unclassified(100);p__Bacteroidetes_unclassified(100);p__Bacteroidetes_unclassified(100);.14	120.178	-23.9089	1.28007	-18.6778	7.50603e-78	9.48011e-75
k__Bacteria(100);p__Bacteroidetes(100);c__Bacteroidia(100);o__Bacteroidales(100);f__Porphyromonadaceae(100);g__Dysgonomonas(100);g__Dysgonomonas_unclassified(100);.2	89.1697	-23.8502	1.45022	-16.4459	8.96787e-61	5.66321e-58
k__Bacteria(100);p__Bacteroidetes(100);c__Bacteroidia(100);o__Bacteroidales(100);f__Porphyromonadaceae(100);g__Candidatus_Azobacteroides(100);g__Candidatus_Azobacteroides_unclassified(100);.17	32.9647	-23.2436	1.32765	-17.5073	1.26098e-68	1.06175e-65
k__Bacteria(100);p__Bacteroidetes(100);c__Bacteroidia(100);o__Bacteroidales(100);f__Porphyromonadaceae(100);g__Candidatus_Azobacteroides(100);g__Candidatus_Azobacteroides_unclassified(100);.23	25.001	-22.954	3.4416	-6.66957	2.5656e-11	1.06241e-09
k__Bacteria(100);p__Bacteroidetes(100);c__Bacteroidia(100);o__Bacteroidales(100);o__Bacteroidales_unclassified(100);o__Bacteroidales_unclassified(100);o__Bacteroidales_unclassified(100);.12	61.946	-22.6671	1.43969	-15.7444	7.50397e-56	3.15917e-53
k__Bacteria(100);p__Bacteroidetes(100);c__Bacteroidia(100);o__Bacteroidales(100);f__Porphyromonadaceae(100);g__Candidatus_Azobacteroides(100);g__Candidatus_Azobacteroides_unclassified(100);.14	40.6406	-22.4525	1.19551	-18.7807	1.0867e-78	2.745e-75
k__Bacteria(100);p__Bacteroidetes(100);p__Bacteroidetes_unclassified(100);p__Bacteroidetes_unclassified(100);p__Bacteroidetes_unclassified(100);p__Bacteroidetes_unclassified(100);p__Bacteroidetes_unclassified(100);.48	9.53903	-21.8337	2.43251	-8.9758	2.81299e-19	2.53771e-17
k__Bacteria(100);p__Bacteroidetes(100);c__Bacteroidia(100);o__Bacteroidales(100);o__Bacteroidales_unclassified(100);o__Bacteroidales_unclassified(100);o__Bacteroidales_unclassified(100);.1	229.734	-21.3893	1.43636	-14.8913	3.75395e-50	1.18531e-47
k__Bacteria(100);p__Bacteroidetes(100);p__Bacteroidetes_unclassified(100);p__Bacteroidetes_unclassified(100);p__Bacteroidetes_unclassified(100);p__Bacteroidetes_unclassified(100);p__Bacteroidetes_unclassified(100);.23	27.5104	-21.3691	1.61864	-13.2019	8.55448e-40	1.80072e-37
k__Bacteria(100);p__Bacteroidetes(100);c__Bacteroidia(100);o__Bacteroidales(100);f__Porphyromonadaceae(100);g__Dysgonomonas(100);g__Dysgonomonas_unclassified(100);.33	4.36845	-21.0613	3.45418	-6.09735	1.07842e-09	3.32205e-08
k__Bacteria(100);p__Firmicutes(100);c__Clostridia(100);o__Clostridiales(100);f__Ruminococcaceae(100);f__Ruminococcaceae_unclassified(67);f__Ruminococcaceae_unclassified(67);	35.0176	-20.9117	2.25045	-9.29225	1.51061e-20	1.52632e-18
k__Bacteria(100);p__Proteobacteria(100);c__Deltaproteobacteria(100);o__Desulfovibrionales(100);f__Desulfovibrionaceae(100);g__Desulfovibrio(100);g__Desulfovibrio_unclassified(80);	26.9084	-20.6009	1.39879	-14.7276	4.28565e-49	1.08255e-46
k__Bacteria(100);p__Fusobacteria(100);c__Fusobacteriia(100);o__Fusobacteriales(100);f__Leptotrichiaceae(100);g__Sebaldella(100);s__termitidis(100);	10.8006	-20.1657	1.44815	-13.9251	4.4581e-44	1.02374e-41
k__Bacteria(100);p__Bacteroidetes(100);p__Bacteroidetes_unclassified(100);p__Bacteroidetes_unclassified(100);p__Bacteroidetes_unclassified(100);p__Bacteroidetes_unclassified(100);p__Bacteroidetes_unclassified(100);.37	14.3953	-20.1157	1.68254	-11.9556	6.07106e-33	1.09539e-30
k__Bacteria(100);p__Planctomycetes(100);c__vadinHA49(100);o__PeHg47(100);o__PeHg47_unclassified(100);o__PeHg47_unclassified(100);o__PeHg47_unclassified(100);.14	4.794	-20.0492	1.85033	-10.8355	2.33711e-27	3.68972e-25
k__Bacteria(100);p__Firmicutes(100);c__Clostridia(100);o__Clostridiales(100);f__Veillonellaceae(100);g__Phascolarctobacterium(100);g__Phascolarctobacterium_unclassified(100);.1	41.2231	-19.9017	1.97513	-10.0761	7.04351e-24	1.04658e-21
k__Bacteria(100);p__Firmicutes(100);c__Clostridia(100);o__Clostridiales(100);f__Lachnospiraceae(100);f__Lachnospiraceae_unclassified(92);f__Lachnospiraceae_unclassified(92);	60.1648	-19.2918	1.18159	-16.327	6.34698e-60	3.20649e-57
k__Bacteria(100);p__Proteobacteria(100);c__Gammaproteobacteria(100);o__Legionellales(100);f__Coxiellaceae(100);g__Rickettsiella(100);g__Rickettsiella_unclassified(100);	29.9147	-19.1553	2.32657	-8.23327	1.82164e-16	1.24364e-14
k__Bacteria(100);p__Tenericutes(100);c__Mollicutes(100);o__Entomoplasmatales(100);f__Entomoplasmataceae(100);f__Entomoplasmataceae_unclassified(100);f__Entomoplasmataceae_unclassified(100);	63.4693	-18.9224	1.88049	-10.0625	8.09223e-24	1.07931e-21
k__Bacteria(100);p__Bacteroidetes(100);c__Bacteroidia(100);o__Bacteroidales(100);f__Bacteroidaceae(98);g__Bacteroides(98);g__Bacteroides_unclassified(98);	12.2523	-18.009	1.86273	-9.66807	4.1206e-22	4.52549e-20
k__Bacteria(100);p__Bacteroidetes(100);c__Bacteroidia(100);o__Bacteroidales(100);f__Porphyromonadaceae(100);g__Dysgonomonas(100);g__Dysgonomonas_unclassified(100);.14	16.177	-16.8469	2.21781	-7.59617	3.05016e-14	1.80087e-12
k__Bacteria(100);p__Elusimicrobia(100);c__Elusimicrobia(100);o__Elusimicrobiales(100);f__Elusimicrobiaceae(100);g__Elusimicrobium(100);s__minutum(100);.1	4.54416	-16.4468	1.63992	-10.029	1.13657e-23	1.43548e-21
k__Bacteria(100);k__Bacteria_unclassified(100);k__Bacteria_unclassified(100);k__Bacteria_unclassified(100);k__Bacteria_unclassified(100);k__Bacteria_unclassified(100);k__Bacteria_unclassified(100);.18	26.0278	-15.2158	1.85258	-8.2133	2.15185e-16	1.43041e-14
k__Bacteria(100);p__Bacteroidetes(100);c__Bacteroidia(100);o__Bacteroidales(100);f__Porphyromonadaceae(100);g__Dysgonomonas(100);g__Dysgonomonas_unclassified(100);.8	28.4896	-15.0894	1.73768	-8.68362	3.83366e-18	3.12381e-16
k__Bacteria(100);p__Firmicutes(100);c__Clostridia(100);o__Clostridiales(100);f__Ruminococcaceae(100);g__Ruminococcus(100);s__flavefaciens(100);	7.81549	-14.7697	5.23459	-2.82156	0.00477907	0.019583
k__Bacteria(100);p__Firmicutes(100);c__Clostridia(100);o__Clostridiales(100);f__Lachnospiraceae(100);f__Lachnospiraceae_unclassified(100);f__Lachnospiraceae_unclassified(100);.9	6.44363	-14.4956	4.03329	-3.59399	0.000325657	0.00215343
k__Bacteria(100);p__Bacteroidetes(100);c__Flavobacteriia(100);o__Flavobacteriales(100);f__[Weeksellaceae](100);g__Wautersiella(100);g__Wautersiella_unclassified(100);	36.9184	-14.1981	2.36922	-5.99272	2.0636e-09	5.85692e-08
k__Bacteria(100);p__Firmicutes(100);c__Clostridia(100);o__Clostridiales(100);f__Lachnospiraceae(100);f__Lachnospiraceae_unclassified(100);f__Lachnospiraceae_unclassified(100);.31	8.35787	-14.1198	2.0971	-6.73301	1.66187e-11	6.99647e-10
k__Bacteria(100);p__Bacteroidetes(100);c__Bacteroidia(100);o__Bacteroidales(100);o__Bacteroidales_unclassified(100);o__Bacteroidales_unclassified(100);o__Bacteroidales_unclassified(100);.19	17.798	-13.8002	2.22631	-6.19868	5.69377e-10	1.89243e-08
k__Bacteria(100);p__Verrucomicrobia(100);c__Verruco-5(100);o__LD1-PB3(100);o__LD1-PB3_unclassified(100);o__LD1-PB3_unclassified(100);o__LD1-PB3_unclassified(100);.2	6.34259	-13.1624	3.85852	-3.41126	0.000646624	0.00382536
k__Bacteria(100);p__Proteobacteria(100);c__Alphaproteobacteria(100);o__Rhodospirillales(100);f__Acetobacteraceae(100);f__Acetobacteraceae_unclassified(100);f__Acetobacteraceae_unclassified(100);	6.61853	-12.9558	3.51255	-3.68844	0.000225629	0.00164248
k__Bacteria(100);p__Bacteroidetes(100);c__Bacteroidia(100);o__Bacteroidales(100);f__[Odoribacteraceae](100);g__Odoribacter(100);g__Odoribacter_unclassified(100);.4	25.5706	-12.8436	2.15883	-5.94932	2.69253e-09	7.474e-08
k__Bacteria(100);p__Bacteroidetes(100);c__Bacteroidia(100);o__Bacteroidales(100);o__Bacteroidales_unclassified(100);o__Bacteroidales_unclassified(100);o__Bacteroidales_unclassified(100);.29	9.65888	-12.5676	3.12092	-4.02688	5.65228e-05	0.000495752
k__Bacteria(100);p__Proteobacteria(100);c__Gammaproteobacteria(100);o__Pseudomonadales(100);f__Moraxellaceae(100);g__Acinetobacter(100);s__rhizosphaerae(100);	257.046	-12.1695	2.01508	-6.0392	1.54881e-09	4.60269e-08
k__Bacteria(100);p__Proteobacteria(100);c__Betaproteobacteria(100);c__Betaproteobacteria_unclassified(100);c__Betaproteobacteria_unclassified(100);c__Betaproteobacteria_unclassified(100);c__Betaproteobacteria_unclassified(100);	87.2212	-11.4717	1.25458	-9.14384	6.02751e-20	5.85596e-18
k__Bacteria(100);p__Proteobacteria(100);c__Gammaproteobacteria(100);o__Enterobacteriales(100);f__Enterobacteriaceae(100);f__Enterobacteriaceae_unclassified(93);f__Enterobacteriaceae_unclassified(93);	227.001	-11.1756	1.22477	-9.12472	7.19241e-20	6.7289e-18
k__Bacteria(100);p__Proteobacteria(100);c__Betaproteobacteria(100);o__SC-I-84(100);o__SC-I-84_unclassified(100);o__SC-I-84_unclassified(100);o__SC-I-84_unclassified(100);	78.1863	-11.1647	1.28686	-8.67598	4.10017e-18	3.23657e-16
k__Bacteria(100);p__Bacteroidetes(100);c__Bacteroidia(100);o__Bacteroidales(100);f__Porphyromonadaceae(100);g__Candidatus_Azobacteroides(100);g__Candidatus_Azobacteroides_unclassified(100);.2	118.73	-10.3807	1.20983	-8.58028	9.46423e-18	7.24444e-16
k__Bacteria(100);p__Bacteroidetes(100);c__Bacteroidia(100);o__Bacteroidales(100);f__Rikenellaceae(100);f__Rikenellaceae_unclassified(100);f__Rikenellaceae_unclassified(100);.9	40.7718	-10.3703	1.03062	-10.0622	8.11829e-24	1.07931e-21
k__Bacteria(100);p__Bacteroidetes(100);p__Bacteroidetes_unclassified(100);p__Bacteroidetes_unclassified(100);p__Bacteroidetes_unclassified(100);p__Bacteroidetes_unclassified(100);p__Bacteroidetes_unclassified(100);.20	34.7814	-9.6615	1.09144	-8.8521	8.58861e-19	7.48097e-17
k__Bacteria(100);p__Actinobacteria(100);c__Actinobacteria(100);o__Bifidobacteriales(100);f__Bifidobacteriaceae(100);g__Bifidobacterium(100);g__Bifidobacterium_unclassified(72);	21.5143	-9.63571	2.03178	-4.74249	2.11105e-06	2.9625e-05
k__Bacteria(100);p__Bacteroidetes(100);c__Bacteroidia(100);o__Bacteroidales(100);f__Porphyromonadaceae(100);g__Candidatus_Azobacteroides(100);g__Candidatus_Azobacteroides_unclassified(100);.8	63.6239	-9.28179	0.988442	-9.39033	5.98138e-21	6.2954e-19
k__Bacteria(100);p__Elusimicrobia(100);c__Endomicrobia(100);c__Endomicrobia_unclassified(100);c__Endomicrobia_unclassified(100);c__Endomicrobia_unclassified(100);c__Endomicrobia_unclassified(100);.4	18.4486	-9.25952	2.14036	-4.32616	1.51734e-05	0.0001597
k__Bacteria(100);p__Proteobacteria(100);c__Betaproteobacteria(100);o__Rhodocyclales(100);f__Rhodocyclaceae(100);f__Rhodocyclaceae_unclassified(100);f__Rhodocyclaceae_unclassified(100);	19.0653	-9.14811	1.08461	-8.43447	3.32712e-17	2.33453e-15
k__Bacteria(100);p__Firmicutes(100);c__Clostridia(100);o__Clostridiales(100);f__Lachnospiraceae(100);g__Blautia(100);g__Blautia_unclassified(100);	14.3953	-9.05892	1.97174	-4.59437	4.34052e-06	5.48208e-05
k__Bacteria(100);p__Firmicutes(100);c__Clostridia(100);o__Clostridiales(100);f__Lachnospiraceae(100);g__Blautia(100);g__Blautia_unclassified(100);.1	12.0615	-8.81056	2.15507	-4.08829	4.34573e-05	0.000397728
k__Bacteria(100);k__Bacteria_unclassified(100);k__Bacteria_unclassified(100);k__Bacteria_unclassified(100);k__Bacteria_unclassified(100);k__Bacteria_unclassified(100);k__Bacteria_unclassified(100);.52	11.7311	-8.73575	2.43409	-3.58891	0.00033206	0.00217866
k__Bacteria(100);p__Bacteroidetes(100);c__Bacteroidia(100);o__Bacteroidales(100);f__Porphyromonadaceae(100);g__Paludibacter(100);g__Paludibacter_unclassified(100);.8	22.2992	-8.62663	1.15916	-7.44213	9.90774e-14	5.56154e-12
k__Bacteria(100);p__Actinobacteria(100);c__Actinobacteria(100);o__Actinomycetales(100);o__Actinomycetales_unclassified(100);o__Actinomycetales_unclassified(100);o__Actinomycetales_unclassified(100);	16.5684	-8.62395	1.5236	-5.66025	1.51152e-08	3.77147e-07
k__Bacteria(100);p__Bacteroidetes(100);c__Bacteroidia(100);o__Bacteroidales(100);f__Porphyromonadaceae(100);g__Candidatus_Azobacteroides(100);g__Candidatus_Azobacteroides_unclassified(100);.22	20.1547	-8.42025	0.982685	-8.56862	1.04734e-17	7.78113e-16
k__Bacteria(100);p__Proteobacteria(100);c__Gammaproteobacteria(100);o__Enterobacteriales(100);f__Enterobacteriaceae(100);f__Enterobacteriaceae_unclassified(99);f__Enterobacteriaceae_unclassified(99);	409.251	-8.36296	1.20718	-6.92766	4.2786e-12	2.00143e-10
k__Bacteria(100);p__Bacteroidetes(100);p__Bacteroidetes_unclassified(100);p__Bacteroidetes_unclassified(100);p__Bacteroidetes_unclassified(100);p__Bacteroidetes_unclassified(100);p__Bacteroidetes_unclassified(100);.22	31.027	-8.27299	1.21319	-6.81921	9.15405e-12	4.13804e-10
k__Bacteria(100);p__Proteobacteria(100);c__Deltaproteobacteria(100);o__Desulfovibrionales(100);f__Desulfovibrionaceae(100);g__Desulfovibrio(100);s__cuneatus(100);.6	9.93039	-8.14943	1.9939	-4.08718	4.36652e-05	0.000398189
k__Bacteria(100);p__Bacteroidetes(100);c__Bacteroidia(100);o__Bacteroidales(100);f__Porphyromonadaceae(100);g__Candidatus_Azobacteroides(100);g__Candidatus_Azobacteroides_unclassified(100);.36	10.2018	-8.10721	1.65435	-4.90055	9.55701e-07	1.50881e-05
k__Bacteria(100);p__Tenericutes(100);c__Mollicutes(100);o__Acholeplasmatales(100);f__Acholeplasmataceae(100);g__Acholeplasma(100);g__Acholeplasma_unclassified(100);.4	11.3396	-8.09871	1.49555	-5.41521	6.12164e-08	1.31045e-06
k__Bacteria(100);p__Proteobacteria(100);c__Alphaproteobacteria(100);o__Rhodobacterales(100);f__Rhodobacteraceae(100);g__Paracoccus(100);g__Paracoccus_unclassified(86);	7.29815	-8.08537	2.80782	-2.87959	0.00398198	0.0170772
k__Bacteria(100);p__Bacteroidetes(100);c__Bacteroidia(100);o__Bacteroidales(100);f__Porphyromonadaceae(100);f__Porphyromonadaceae_unclassified(100);f__Porphyromonadaceae_unclassified(100);.17	9.94127	-8.08341	1.50292	-5.37846	7.51255e-08	1.58139e-06
k__Bacteria(100);p__Proteobacteria(100);c__Betaproteobacteria(100);o__Rhodocyclales(99);f__Rhodocyclaceae(99);f__Rhodocyclaceae_unclassified(99);f__Rhodocyclaceae_unclassified(99);	7.44089	-8.00006	1.99419	-4.01168	6.02887e-05	0.000525135
k__Bacteria(100);p__Verrucomicrobia(100);c__Opitutae(100);o__[Cerasicoccales](100);f__[Cerasicoccaceae](100);f__[Cerasicoccaceae]_unclassified(100);f__[Cerasicoccaceae]_unclassified(100);.2	10.6898	-7.97317	1.7345	-4.59681	4.29017e-06	5.44571e-05
k__Bacteria(100);p__Bacteroidetes(100);c__Bacteroidia(100);o__Bacteroidales(100);f__Porphyromonadaceae(100);f__Porphyromonadaceae_unclassified(99);f__Porphyromonadaceae_unclassified(99);	14.2577	-7.96966	1.61892	-4.92284	8.52969e-07	1.37236e-05
k__Bacteria(100);p__Bacteroidetes(100);p__Bacteroidetes_unclassified(100);p__Bacteroidetes_unclassified(100);p__Bacteroidetes_unclassified(100);p__Bacteroidetes_unclassified(100);p__Bacteroidetes_unclassified(100);.52	6.79797	-7.96385	2.07536	-3.83733	0.00012438	0.000972705
k__Bacteria(100);p__Bacteroidetes(100);c__Bacteroidia(100);o__Bacteroidales(100);o__Bacteroidales_unclassified(100);o__Bacteroidales_unclassified(100);o__Bacteroidales_unclassified(100);.18	30.6154	-7.95941	1.23785	-6.43003	1.27575e-10	4.95778e-09
k__Bacteria(100);p__Firmicutes(100);c__Clostridia(100);o__Clostridiales(100);f__Ruminococcaceae(100);f__Ruminococcaceae_unclassified(100);f__Ruminococcaceae_unclassified(100);.59	8.77904	-7.9454	1.0128	-7.84503	4.32864e-15	2.80363e-13
k__Bacteria(100);p__Bacteroidetes(100);p__Bacteroidetes_unclassified(100);p__Bacteroidetes_unclassified(100);p__Bacteroidetes_unclassified(100);p__Bacteroidetes_unclassified(100);p__Bacteroidetes_unclassified(100);.51	7.25203	-7.93942	1.71735	-4.62307	3.78104e-06	4.94865e-05
k__Bacteria(100);p__Bacteroidetes(100);c__Bacteroidia(100);o__Bacteroidales(100);f__Porphyromonadaceae(100);g__Paludibacter(100);g__Paludibacter_unclassified(100);.15	10.7238	-7.88179	1.3928	-5.65896	1.52292e-08	3.77147e-07
k__Bacteria(100);p__Firmicutes(100);c__Clostridia(100);o__Clostridiales(100);f__Lachnospiraceae(100);g__Roseburia(100);s__faecis(99);	7.57609	-7.85992	2.16178	-3.63586	0.000277056	0.00191738
k__Bacteria(100);p__Bacteroidetes(100);c__Bacteroidia(100);o__Bacteroidales(100);o__Bacteroidales_unclassified(100);o__Bacteroidales_unclassified(100);o__Bacteroidales_unclassified(100);.31	9.40183	-7.85702	1.20365	-6.52768	6.67984e-11	2.6783e-09
k__Bacteria(100);p__Proteobacteria(100);c__Deltaproteobacteria(100);o__Desulfovibrionales(100);f__Desulfovibrionaceae(100);g__Desulfovibrio(100);g__Desulfovibrio_unclassified(78);	93.7149	-7.83885	0.896404	-8.74477	2.23474e-18	1.88165e-16
k__Bacteria(100);p__Proteobacteria(100);p__Proteobacteria_unclassified(100);p__Proteobacteria_unclassified(100);p__Proteobacteria_unclassified(100);p__Proteobacteria_unclassified(100);p__Proteobacteria_unclassified(100);.16	8.83163	-7.80764	1.8484	-4.22401	2.39994e-05	0.00022963
k__Bacteria(100);p__Bacteroidetes(100);c__Bacteroidia(100);o__Bacteroidales(100);o__Bacteroidales_unclassified(100);o__Bacteroidales_unclassified(100);o__Bacteroidales_unclassified(100);.37	7.92864	-7.80066	1.89182	-4.12337	3.73362e-05	0.000346732
k__Bacteria(100);p__Firmicutes(100);c__Clostridia(100);o__Clostridiales(100);f__Ruminococcaceae(100);f__Ruminococcaceae_unclassified(100);f__Ruminococcaceae_unclassified(100);.57	8.67029	-7.76981	1.42105	-5.46766	4.56011e-08	1.00164e-06
k__Bacteria(100);p__Firmicutes(100);c__Clostridia(100);o__Clostridiales(100);f__Lachnospiraceae(100);g__Clostridium(100);s__clostridioforme(100);	5.84906	-7.76287	1.98866	-3.90356	9.47875e-05	0.00077738
k__Bacteria(100);p__Bacteroidetes(100);c__Bacteroidia(100);o__Bacteroidales(100);f__Porphyromonadaceae(100);f__Porphyromonadaceae_unclassified(100);f__Porphyromonadaceae_unclassified(100);.19	9.60938	-7.69999	1.77395	-4.34059	1.42097e-05	0.000153392
k__Bacteria(100);p__Firmicutes(100);c__Bacilli(100);o__Lactobacillales(100);f__Streptococcaceae(100);g__Lactococcus(100);s__garvieae(100);	13.7318	-7.67697	1.40775	-5.45335	4.9431e-08	1.0764e-06
k__Bacteria(100);p__Bacteroidetes(100);c__Bacteroidia(100);o__Bacteroidales(100);f__Porphyromonadaceae(100);g__Dysgonomonas(100);g__Dysgonomonas_unclassified(100);.10	31.5079	-7.62669	1.19077	-6.40485	1.50515e-10	5.76062e-09
k__Bacteria(100);p__Bacteroidetes(100);c__Bacteroidia(100);o__Bacteroidales(100);o__Bacteroidales_unclassified(100);o__Bacteroidales_unclassified(100);o__Bacteroidales_unclassified(100);.39	5.26704	-7.61279	1.60414	-4.74572	2.07771e-06	2.932e-05
k__Bacteria(100);k__Bacteria_unclassified(100);k__Bacteria_unclassified(100);k__Bacteria_unclassified(100);k__Bacteria_unclassified(100);k__Bacteria_unclassified(100);k__Bacteria_unclassified(100);.107	5.36114	-7.61272	2.12595	-3.58086	0.000342465	0.00222814
k__Bacteria(100);p__Bacteroidetes(100);c__Bacteroidia(100);o__Bacteroidales(100);f__Rikenellaceae(100);f__Rikenellaceae_unclassified(100);f__Rikenellaceae_unclassified(100);.15	30.7787	-7.55695	2.59502	-2.9121	0.00359009	0.0157714
k__Bacteria(100);p__Bacteroidetes(100);c__Bacteroidia(100);o__Bacteroidales(100);f__Bacteroidaceae(100);g__Bacteroides(100);g__Bacteroides_unclassified(100);	272.364	-7.50377	1.83053	-4.09922	4.14544e-05	0.000382167
k__Bacteria(100);p__Firmicutes(100);c__Erysipelotrichi(100);o__Erysipelotrichales(100);f__Erysipelotrichaceae(100);f__Erysipelotrichaceae_unclassified(100);f__Erysipelotrichaceae_unclassified(100);.3	28.1193	-7.43994	1.52705	-4.87211	1.10411e-06	1.69029e-05
k__Bacteria(100);p__Firmicutes(100);c__Clostridia(100);o__Clostridiales(100);o__Clostridiales_unclassified(100);o__Clostridiales_unclassified(100);o__Clostridiales_unclassified(100);.28	7.25365	-7.41935	1.37451	-5.39782	6.74563e-08	1.43189e-06
k__Bacteria(100);p__Bacteroidetes(100);c__Bacteroidia(100);o__Bacteroidales(100);f__Bacteroidaceae(100);g__Bacteroides(100);g__Bacteroides_unclassified(100);.3	24.6158	-7.41913	1.38964	-5.33888	9.3525e-08	1.88995e-06
k__Bacteria(100);p__Bacteroidetes(100);c__Bacteroidia(100);o__Bacteroidales(100);f__Rikenellaceae(100);f__Rikenellaceae_unclassified(100);f__Rikenellaceae_unclassified(100);.44	6.99056	-7.41384	1.02408	-7.23955	4.5019e-13	2.41953e-11
k__Bacteria(100);p__Bacteroidetes(100);c__Bacteroidia(100);o__Bacteroidales(100);f__Porphyromonadaceae(100);g__Paludibacter(100);g__Paludibacter_unclassified(100);.20	5.00223	-7.41265	1.91278	-3.87532	0.000106484	0.000855612
k__Bacteria(100);p__Firmicutes(100);c__Clostridia(100);o__Clostridiales(100);f__Lachnospiraceae(100);g__[Ruminococcus](99);s__gnavus(99);	4.2805	-7.29692	2.02683	-3.60016	0.000318016	0.00212515
k__Bacteria(100);p__Bacteroidetes(100);c__Bacteroidia(100);o__Bacteroidales(100);f__Porphyromonadaceae(100);g__Paludibacter(100);g__Paludibacter_unclassified(100);.21	4.18302	-7.28303	2.64979	-2.74853	0.00598638	0.0231571
k__Bacteria(100);p__Firmicutes(100);c__Clostridia(100);o__Clostridiales(100);f__Dehalobacteriaceae(100);g__Dehalobacterium(100);g__Dehalobacterium_unclassified(100);.3	13.6723	-7.21564	1.30266	-5.53917	3.03913e-08	6.85431e-07
k__Bacteria(100);p__Bacteroidetes(100);c__Bacteroidia(100);o__Bacteroidales(100);f__Porphyromonadaceae(100);g__Candidatus_Azobacteroides(100);g__Candidatus_Azobacteroides_unclassified(100);.38	7.53745	-7.18702	1.60152	-4.48761	7.20251e-06	8.34566e-05
k__Bacteria(100);k__Bacteria_unclassified(100);k__Bacteria_unclassified(100);k__Bacteria_unclassified(100);k__Bacteria_unclassified(100);k__Bacteria_unclassified(100);k__Bacteria_unclassified(100);.28	25.1435	-7.15817	1.50417	-4.75889	1.94663e-06	2.76988e-05
k__Bacteria(100);p__Synergistetes(100);c__Synergistia(100);o__Synergistales(100);f__Synergistaceae(100);g__Candidatus_Tammella(100);g__Candidatus_Tammella_unclassified(100);.10	4.02501	-7.14304	2.13297	-3.34887	0.000811422	0.00455478
k__Bacteria(100);p__Bacteroidetes(100);c__Bacteroidia(100);o__Bacteroidales(100);o__Bacteroidales_unclassified(100);o__Bacteroidales_unclassified(100);o__Bacteroidales_unclassified(100);	468.77	-7.13674	1.3604	-5.24606	1.55387e-07	2.99625e-06
k__Bacteria(100);k__Bacteria_unclassified(100);k__Bacteria_unclassified(100);k__Bacteria_unclassified(100);k__Bacteria_unclassified(100);k__Bacteria_unclassified(100);k__Bacteria_unclassified(100);.71	7.27864	-7.10065	1.05399	-6.73694	1.61753e-11	6.92523e-10
k__Bacteria(100);p__Bacteroidetes(100);c__Bacteroidia(100);o__Bacteroidales(100);f__Rikenellaceae(100);f__Rikenellaceae_unclassified(100);f__Rikenellaceae_unclassified(100);.45	6.68689	-7.09355	1.63656	-4.33444	1.46135e-05	0.000156414
k__Bacteria(100);p__Firmicutes(100);c__Clostridia(100);o__Clostridiales(100);f__Lachnospiraceae(100);f__Lachnospiraceae_unclassified(100);f__Lachnospiraceae_unclassified(100);.49	3.64762	-7.08498	2.27744	-3.11094	0.00186496	0.00925517
k__Bacteria(100);p__Firmicutes(100);c__Bacilli(100);o__Lactobacillales(100);f__Streptococcaceae(100);g__Lactococcus(100);g__Lactococcus_unclassified(100);	9.61466	-7.08394	1.37569	-5.14937	2.61368e-07	4.78418e-06
k__Bacteria(100);p__Proteobacteria(100);c__Gammaproteobacteria(100);o__Pseudomonadales(100);f__Pseudomonadaceae(100);g__Pseudomonas(75);g__Pseudomonas_unclassified(65);	27.7795	-7.06575	1.25495	-5.63032	1.79877e-08	4.41135e-07
k__Bacteria(100);p__Firmicutes(100);c__Erysipelotrichi(100);o__Erysipelotrichales(100);f__Erysipelotrichaceae(100);f__Erysipelotrichaceae_unclassified(100);f__Erysipelotrichaceae_unclassified(100);.4	32.9533	-7.03545	1.63712	-4.29747	1.72761e-05	0.000176766
k__Bacteria(100);p__Cyanobacteria(100);c__4C0d-2(100);o__YS2(100);o__YS2_unclassified(100);o__YS2_unclassified(100);o__YS2_unclassified(100);.1	3.84187	-7.01435	1.98315	-3.53698	0.000404726	0.00254313
k__Bacteria(100);p__Firmicutes(100);c__Clostridia(100);o__Clostridiales(100);f__Lachnospiraceae(100);f__Lachnospiraceae_unclassified(100);f__Lachnospiraceae_unclassified(100);.48	4.23962	-6.89592	2.04908	-3.36537	0.000764419	0.00435874
k__Bacteria(100);k__Bacteria_unclassified(100);k__Bacteria_unclassified(100);k__Bacteria_unclassified(100);k__Bacteria_unclassified(100);k__Bacteria_unclassified(100);k__Bacteria_unclassified(100);.89	4.37753	-6.89122	1.15266	-5.97853	2.25165e-09	6.31962e-08
k__Bacteria(100);p__Bacteroidetes(100);c__Bacteroidia(100);o__Bacteroidales(100);f__Rikenellaceae(100);f__Rikenellaceae_unclassified(100);f__Rikenellaceae_unclassified(100);.49	6.21063	-6.86907	1.6055	-4.27846	1.88194e-05	0.000188642
k__Bacteria(100);p__Firmicutes(100);c__Clostridia(100);o__Clostridiales(100);f__Ruminococcaceae(100);f__Ruminococcaceae_unclassified(100);f__Ruminococcaceae_unclassified(100);.50	12.4855	-6.84826	1.80899	-3.78568	0.000153288	0.00116628
k__Bacteria(100);p__Bacteroidetes(100);c__Bacteroidia(100);o__Bacteroidales(100);f__Porphyromonadaceae(100);g__Dysgonomonas(100);g__Dysgonomonas_unclassified(100);.17	12.9076	-6.8395	1.559	-4.3871	1.1487e-05	0.00012839
k__Bacteria(100);k__Bacteria_unclassified(100);k__Bacteria_unclassified(100);k__Bacteria_unclassified(100);k__Bacteria_unclassified(100);k__Bacteria_unclassified(100);k__Bacteria_unclassified(100);.101	4.85589	-6.81301	1.31101	-5.19676	2.0279e-07	3.82275e-06
k__Bacteria(100);p__Proteobacteria(100);c__Alphaproteobacteria(100);o__RF32(100);o__RF32_unclassified(100);o__RF32_unclassified(100);o__RF32_unclassified(100);.14	3.19943	-6.79396	2.4608	-2.76087	0.00576468	0.0224025
k__Bacteria(100);p__Firmicutes(100);c__Clostridia(100);o__Clostridiales(100);f__Lachnospiraceae(100);f__Lachnospiraceae_unclassified(94);f__Lachnospiraceae_unclassified(94);.1	2.95934	-6.78072	1.8847	-3.59777	0.000320956	0.00213352
k__Bacteria(100);p__Firmicutes(100);c__Bacilli(100);o__Lactobacillales(100);f__Streptococcaceae(100);g__Streptococcus(100);g__Streptococcus_unclassified(100);	6.38062	-6.77461	1.70534	-3.97259	7.10949e-05	0.000603183
k__Bacteria(100);p__Bacteroidetes(100);c__Bacteroidia(100);o__Bacteroidales(100);f__Porphyromonadaceae(100);g__Dysgonomonas(100);s__gadei(57);	17.0858	-6.76486	1.52797	-4.42735	9.53967e-06	0.000108546
k__Bacteria(100);p__Bacteroidetes(100);p__Bacteroidetes_unclassified(100);p__Bacteroidetes_unclassified(100);p__Bacteroidetes_unclassified(100);p__Bacteroidetes_unclassified(100);p__Bacteroidetes_unclassified(100);.72	2.95383	-6.75199	2.31313	-2.91898	0.00351179	0.0155901
k__Bacteria(100);p__Firmicutes(100);c__Clostridia(100);o__Clostridiales(100);f__Lachnospiraceae(100);g__Blautia(100);s__obeum(99);	3.53718	-6.74411	2.29988	-2.93238	0.00336376	0.0150121
k__Bacteria(100);p__Planctomycetes(100);c__Planctomycetia(100);o__Pirellulales(100);f__Pirellulaceae(100);f__Pirellulaceae_unclassified(100);f__Pirellulaceae_unclassified(100);.14	6.86036	-6.73344	1.34811	-4.99472	5.89217e-07	9.79186e-06
k__Bacteria(100);p__Proteobacteria(100);p__Proteobacteria_unclassified(100);p__Proteobacteria_unclassified(100);p__Proteobacteria_unclassified(100);p__Proteobacteria_unclassified(100);p__Proteobacteria_unclassified(100);.19	7.28998	-6.72728	1.07527	-6.25635	3.94103e-10	1.3637e-08
k__Bacteria(100);p__Bacteroidetes(100);c__Bacteroidia(100);o__Bacteroidales(100);f__Porphyromonadaceae(100);f__Porphyromonadaceae_unclassified(100);f__Porphyromonadaceae_unclassified(100);.8	38.4911	-6.70281	1.32825	-5.04637	4.50291e-07	7.73766e-06
k__Bacteria(100);k__Bacteria_unclassified(100);k__Bacteria_unclassified(100);k__Bacteria_unclassified(100);k__Bacteria_unclassified(100);k__Bacteria_unclassified(100);k__Bacteria_unclassified(100);.134	3.30004	-6.69182	2.37058	-2.82286	0.00475969	0.0195814
k__Bacteria(100);p__Bacteroidetes(100);c__Bacteroidia(100);o__Bacteroidales(100);f__Rikenellaceae(100);f__Rikenellaceae_unclassified(100);f__Rikenellaceae_unclassified(100);.71	2.82311	-6.67	1.71185	-3.89638	9.76413e-05	0.000795808
k__Bacteria(100);p__Lentisphaerae(100);c__[Lentisphaeria](100);o__Victivallales(100);f__Victivallaceae(100);f__Victivallaceae_unclassified(100);f__Victivallaceae_unclassified(100);.7	6.88071	-6.66827	1.48529	-4.48955	7.13723e-06	8.30813e-05
k__Bacteria(100);p__Bacteroidetes(100);c__Bacteroidia(100);o__Bacteroidales(100);f__Rikenellaceae(100);f__Rikenellaceae_unclassified(100);f__Rikenellaceae_unclassified(100);.22	15.1424	-6.60905	1.01531	-6.50936	7.54708e-11	2.97874e-09
k__Bacteria(100);p__Bacteroidetes(100);c__Bacteroidia(100);o__Bacteroidales(100);f__Rikenellaceae(100);f__Rikenellaceae_unclassified(100);f__Rikenellaceae_unclassified(100);.65	2.98653	-6.60189	1.92625	-3.42732	0.000609576	0.00364663
k__Bacteria(100);p__Bacteroidetes(100);c__Bacteroidia(100);o__Bacteroidales(100);f__Rikenellaceae(100);f__Rikenellaceae_unclassified(100);f__Rikenellaceae_unclassified(100);.27	15.0511	-6.58795	1.11271	-5.92061	3.20746e-09	8.80658e-08
k__Bacteria(100);p__Bacteroidetes(100);p__Bacteroidetes_unclassified(100);p__Bacteroidetes_unclassified(100);p__Bacteroidetes_unclassified(100);p__Bacteroidetes_unclassified(100);p__Bacteroidetes_unclassified(100);.63	4.79773	-6.58512	1.70048	-3.87251	0.00010772	0.000861075
k__Bacteria(100);p__Bacteroidetes(100);p__Bacteroidetes_unclassified(100);p__Bacteroidetes_unclassified(100);p__Bacteroidetes_unclassified(100);p__Bacteroidetes_unclassified(100);p__Bacteroidetes_unclassified(100);.67	4.38458	-6.55807	1.73963	-3.76981	0.000163372	0.00123187
k__Bacteria(100);p__Bacteroidetes(100);c__Bacteroidia(100);o__Bacteroidales(100);f__Rikenellaceae(100);f__Rikenellaceae_unclassified(100);f__Rikenellaceae_unclassified(100);.60	3.32115	-6.55451	1.96875	-3.32927	0.000870728	0.00483398
k__Bacteria(100);p__Bacteroidetes(100);c__Bacteroidia(100);o__Bacteroidales(100);f__Porphyromonadaceae(100);g__Paludibacter(100);g__Paludibacter_unclassified(100);.16	7.22794	-6.55001	1.79097	-3.65725	0.000254939	0.00179881
k__Bacteria(100);p__Bacteroidetes(100);c__Bacteroidia(100);o__Bacteroidales(100);f__Porphyromonadaceae(100);g__Candidatus_Azobacteroides(100);g__Candidatus_Azobacteroides_unclassified(100);.37	9.92874	-6.54826	1.36496	-4.7974	1.60741e-06	2.41685e-05
k__Bacteria(100);p__Firmicutes(100);c__Clostridia(100);o__Clostridiales(100);f__Ruminococcaceae(100);f__Ruminococcaceae_unclassified(100);f__Ruminococcaceae_unclassified(100);.125	2.46937	-6.52683	2.60339	-2.50705	0.0121742	0.0415007
k__Bacteria(100);p__Firmicutes(100);c__Clostridia(100);o__Clostridiales(100);f__Ruminococcaceae(100);f__Ruminococcaceae_unclassified(99);f__Ruminococcaceae_unclassified(99);	2.46998	-6.52401	2.45675	-2.65554	0.00791805	0.028945
k__Bacteria(100);p__Bacteroidetes(100);p__Bacteroidetes_unclassified(100);p__Bacteroidetes_unclassified(100);p__Bacteroidetes_unclassified(100);p__Bacteroidetes_unclassified(100);p__Bacteroidetes_unclassified(100);.69	3.09118	-6.50765	1.93115	-3.36983	0.000752146	0.00429846
k__Bacteria(100);p__Firmicutes(100);c__Clostridia(100);o__Clostridiales(100);f__Christensenellaceae(99);f__Christensenellaceae_unclassified(99);f__Christensenellaceae_unclassified(99);.1	2.77934	-6.4822	1.5781	-4.10761	3.99777e-05	0.000369903
k__Bacteria(100);k__Bacteria_unclassified(100);k__Bacteria_unclassified(100);k__Bacteria_unclassified(100);k__Bacteria_unclassified(100);k__Bacteria_unclassified(100);k__Bacteria_unclassified(100);.125	3.29481	-6.47905	1.35894	-4.76771	1.86329e-06	2.69692e-05
k__Bacteria(100);p__Firmicutes(100);c__Clostridia(100);o__Clostridiales(100);o__Clostridiales_unclassified(83);o__Clostridiales_unclassified(83);o__Clostridiales_unclassified(83);	5.26193	-6.45372	1.51394	-4.26286	2.01827e-05	0.000199146
k__Bacteria(100);p__Proteobacteria(100);c__Gammaproteobacteria(100);o__Xanthomonadales(100);f__Xanthomonadaceae(100);g__Stenotrophomonas(100);s__geniculata(82);	27.7904	-6.37761	1.27582	-4.99884	5.76772e-07	9.64852e-06
k__Bacteria(100);p__Firmicutes(100);p__Firmicutes_unclassified(100);p__Firmicutes_unclassified(100);p__Firmicutes_unclassified(100);p__Firmicutes_unclassified(100);p__Firmicutes_unclassified(100);.22	13.289	-6.37452	1.44875	-4.4	1.08249e-05	0.000121527
k__Bacteria(100);k__Bacteria_unclassified(100);k__Bacteria_unclassified(100);k__Bacteria_unclassified(100);k__Bacteria_unclassified(100);k__Bacteria_unclassified(100);k__Bacteria_unclassified(100);.82	4.58577	-6.36881	1.6647	-3.8258	0.000130349	0.00101624
k__Bacteria(100);p__Proteobacteria(100);p__Proteobacteria_unclassified(100);p__Proteobacteria_unclassified(100);p__Proteobacteria_unclassified(100);p__Proteobacteria_unclassified(100);p__Proteobacteria_unclassified(100);.4	28.3925	-6.3459	1.25196	-5.06877	4.00397e-07	7.07274e-06
k__Bacteria(100);p__Planctomycetes(100);c__Planctomycetia(100);o__Pirellulales(100);f__Pirellulaceae(100);f__Pirellulaceae_unclassified(100);f__Pirellulaceae_unclassified(100);.20	4.3396	-6.32492	1.26735	-4.99067	6.01717e-07	9.93424e-06
k__Bacteria(100);p__Actinobacteria(100);c__Actinobacteria(100);o__Actinomycetales(100);f__Microbacteriaceae(100);g__Agromyces(100);g__Agromyces_unclassified(100);	2.6496	-6.29513	1.36701	-4.60504	4.12385e-06	5.28774e-05
k__Bacteria(100);p__Firmicutes(100);p__Firmicutes_unclassified(100);p__Firmicutes_unclassified(100);p__Firmicutes_unclassified(100);p__Firmicutes_unclassified(100);p__Firmicutes_unclassified(100);.43	5.06117	-6.27794	1.16987	-5.36637	8.03385e-08	1.67715e-06
k__Bacteria(100);p__Firmicutes(100);c__Clostridia(100);o__Clostridiales(100);f__Clostridiaceae(97);g__SMB53(97);g__SMB53_unclassified(97);	3.09081	-6.24731	1.74517	-3.57977	0.000343897	0.00222814
k__Bacteria(100);k__Bacteria_unclassified(100);k__Bacteria_unclassified(100);k__Bacteria_unclassified(100);k__Bacteria_unclassified(100);k__Bacteria_unclassified(100);k__Bacteria_unclassified(100);.102	4.1194	-6.24479	1.58287	-3.94524	7.9721e-05	0.000661191
k__Bacteria(100);p__Bacteroidetes(100);p__Bacteroidetes_unclassified(100);p__Bacteroidetes_unclassified(100);p__Bacteroidetes_unclassified(100);p__Bacteroidetes_unclassified(100);p__Bacteroidetes_unclassified(100);.73	2.64742	-6.23505	2.00955	-3.10271	0.00191759	0.00946062
k__Bacteria(100);p__Bacteroidetes(100);c__Bacteroidia(100);o__Bacteroidales(100);f__Porphyromonadaceae(100);g__Dysgonomonas(100);g__Dysgonomonas_unclassified(100);.16	18.0343	-6.21686	1.55386	-4.00091	6.30988e-05	0.000545848
k__Bacteria(100);p__Lentisphaerae(100);c__[Lentisphaeria](100);o__Victivallales(100);f__Victivallaceae(100);f__Victivallaceae_unclassified(100);f__Victivallaceae_unclassified(100);.2	11.4558	-6.19177	1.29181	-4.79311	1.64219e-06	2.45454e-05
k__Bacteria(100);p__Proteobacteria(100);c__Deltaproteobacteria(100);c__Deltaproteobacteria_unclassified(55);c__Deltaproteobacteria_unclassified(55);c__Deltaproteobacteria_unclassified(55);c__Deltaproteobacteria_unclassified(55);	7.50432	-6.15995	0.855165	-7.20323	5.88031e-13	3.03136e-11
k__Bacteria(100);p__Bacteroidetes(100);c__Bacteroidia(100);o__Bacteroidales(100);f__Porphyromonadaceae(100);g__Paludibacter(100);g__Paludibacter_unclassified(100);.19	5.90088	-6.13923	1.32916	-4.61887	3.85841e-06	5.02389e-05
k__Bacteria(100);p__Bacteroidetes(100);p__Bacteroidetes_unclassified(100);p__Bacteroidetes_unclassified(100);p__Bacteroidetes_unclassified(100);p__Bacteroidetes_unclassified(100);p__Bacteroidetes_unclassified(100);.28	31.8503	-6.13136	1.43011	-4.28732	1.8084e-05	0.000184194
k__Bacteria(100);p__Elusimicrobia(100);c__Endomicrobia(100);c__Endomicrobia_unclassified(100);c__Endomicrobia_unclassified(100);c__Endomicrobia_unclassified(100);c__Endomicrobia_unclassified(100);.7	2.90589	-6.08588	2.15714	-2.82127	0.00478334	0.019583
k__Bacteria(100);p__Bacteroidetes(100);c__Bacteroidia(100);o__Bacteroidales(100);f__Porphyromonadaceae(100);g__Candidatus_Azobacteroides(100);g__Candidatus_Azobacteroides_unclassified(100);.52	2.24251	-6.04502	1.66805	-3.62401	0.000290076	0.00199324
k__Bacteria(100);p__Bacteroidetes(100);c__Bacteroidia(100);o__Bacteroidales(100);f__Porphyromonadaceae(100);g__Candidatus_Azobacteroides(100);g__Candidatus_Azobacteroides_unclassified(100);.35	7.85976	-6.00587	1.97816	-3.03609	0.00239671	0.0114878
k__Bacteria(100);p__Bacteroidetes(100);p__Bacteroidetes_unclassified(100);p__Bacteroidetes_unclassified(100);p__Bacteroidetes_unclassified(100);p__Bacteroidetes_unclassified(100);p__Bacteroidetes_unclassified(100);.70	3.26362	-5.98799	1.07275	-5.58192	2.37873e-08	5.61557e-07
k__Bacteria(100);p__Bacteroidetes(100);c__Bacteroidia(100);o__Bacteroidales(100);f__Porphyromonadaceae(100);g__Candidatus_Azobacteroides(100);g__Candidatus_Azobacteroides_unclassified(100);.34	11.2095	-5.97133	1.53526	-3.88947	0.000100464	0.000813372
k__Bacteria(100);p__Bacteroidetes(100);c__Bacteroidia(100);o__Bacteroidales(100);f__Rikenellaceae(100);f__Rikenellaceae_unclassified(100);f__Rikenellaceae_unclassified(100);.47	7.0039	-5.95005	1.18196	-5.03404	4.8026e-07	8.14185e-06
k__Bacteria(100);k__Bacteria_unclassified(100);k__Bacteria_unclassified(100);k__Bacteria_unclassified(100);k__Bacteria_unclassified(100);k__Bacteria_unclassified(100);k__Bacteria_unclassified(100);.135	3.07935	-5.92399	1.10673	-5.35271	8.66452e-08	1.76505e-06
k__Bacteria(100);p__Bacteroidetes(100);c__Bacteroidia(100);o__Bacteroidales(100);f__Porphyromonadaceae(100);g__Paludibacter(100);g__Paludibacter_unclassified(100);.18	7.06688	-5.87402	1.14197	-5.14377	2.6928e-07	4.89353e-06
k__Bacteria(100);k__Bacteria_unclassified(100);k__Bacteria_unclassified(100);k__Bacteria_unclassified(100);k__Bacteria_unclassified(100);k__Bacteria_unclassified(100);k__Bacteria_unclassified(100);.105	4.15614	-5.86902	1.30085	-4.51169	6.43136e-06	7.59255e-05
k__Bacteria(100);p__Bacteroidetes(100);c__Bacteroidia(100);o__Bacteroidales(100);f__Rikenellaceae(100);g__Blvii28(100);g__Blvii28_unclassified(100);	4.56149	-5.86054	1.28029	-4.5775	4.70571e-06	5.90491e-05
k__Bacteria(100);p__Actinobacteria(100);c__Actinobacteria(100);o__Actinomycetales(100);o__Actinomycetales_unclassified(74);o__Actinomycetales_unclassified(74);o__Actinomycetales_unclassified(74);	1.583	-5.8467	1.75978	-3.32241	0.000892435	0.00491131
k__Bacteria(100);p__Synergistetes(100);c__Synergistia(100);o__Synergistales(100);f__Synergistaceae(100);g__Candidatus_Tammella(100);g__Candidatus_Tammella_unclassified(100);.8	3.63956	-5.84667	1.61561	-3.61886	0.0002959	0.00202283
k__Bacteria(100);p__Planctomycetes(100);c__Planctomycetia(100);o__Pirellulales(100);f__Pirellulaceae(100);f__Pirellulaceae_unclassified(100);f__Pirellulaceae_unclassified(100);.24	1.58121	-5.83942	2.05873	-2.83642	0.0045623	0.0190733
k__Bacteria(100);p__Firmicutes(100);c__Clostridia(100);o__Clostridiales(100);f__Ruminococcaceae(100);g__Clostridium(88);s__methylpentosum(88);	64.5774	-5.82595	1.37765	-4.22892	2.3482e-05	0.000225534
k__Bacteria(100);p__Bacteroidetes(100);c__Bacteroidia(100);o__Bacteroidales(100);f__Rikenellaceae(100);f__Rikenellaceae_unclassified(100);f__Rikenellaceae_unclassified(100);.38	12.1202	-5.79192	1.08836	-5.32168	1.02812e-07	2.06114e-06
k__Bacteria(100);p__Firmicutes(100);c__Clostridia(100);o__Clostridiales(100);f__Ruminococcaceae(82);f__Ruminococcaceae_unclassified(82);f__Ruminococcaceae_unclassified(82);	4.12316	-5.76951	1.34836	-4.27892	1.87801e-05	0.000188642
k__Bacteria(100);p__Elusimicrobia(100);c__Elusimicrobia(100);o__Elusimicrobiales(100);f__Elusimicrobiaceae(100);f__Elusimicrobiaceae_unclassified(100);f__Elusimicrobiaceae_unclassified(100);.2	4.2053	-5.75439	2.00249	-2.87362	0.004058	0.0173443
k__Bacteria(100);p__Cyanobacteria(100);c__Synechococcophycideae(100);o__Synechococcales(100);f__Synechococcaceae(100);g__Synechococcus(98);g__Synechococcus_unclassified(98);	3.27436	-5.73369	0.844498	-6.78947	1.12549e-11	4.90171e-10
k__Bacteria(100);p__Bacteroidetes(100);c__Bacteroidia(100);o__Bacteroidales(100);f__Rikenellaceae(100);f__Rikenellaceae_unclassified(100);f__Rikenellaceae_unclassified(100);.78	2.10403	-5.71428	1.27477	-4.48259	7.37435e-06	8.50576e-05
k__Bacteria(100);p__Elusimicrobia(100);c__Endomicrobia(100);c__Endomicrobia_unclassified(100);c__Endomicrobia_unclassified(100);c__Endomicrobia_unclassified(100);c__Endomicrobia_unclassified(100);.8	2.19727	-5.68987	1.81263	-3.13901	0.00169522	0.00858143
k__Bacteria(100);p__Firmicutes(100);c__Clostridia(100);o__Clostridiales(100);f__Ruminococcaceae(100);f__Ruminococcaceae_unclassified(100);f__Ruminococcaceae_unclassified(100);.141	1.57316	-5.66437	1.84412	-3.07159	0.00212922	0.010363
k__Bacteria(100);p__Firmicutes(100);c__Clostridia(100);o__Clostridiales(100);o__Clostridiales_unclassified(100);o__Clostridiales_unclassified(100);o__Clostridiales_unclassified(100);.17	11.6084	-5.65326	1.52917	-3.69693	0.000218219	0.00160239
k__Bacteria(100);p__Firmicutes(100);c__Clostridia(100);o__Clostridiales(100);f__Ruminococcaceae(100);f__Ruminococcaceae_unclassified(79);f__Ruminococcaceae_unclassified(79);	4.17136	-5.65107	1.92675	-2.93296	0.00335749	0.0150107
k__Bacteria(100);p__Bacteroidetes(100);c__Bacteroidia(100);o__Bacteroidales(100);o__Bacteroidales_unclassified(100);o__Bacteroidales_unclassified(100);o__Bacteroidales_unclassified(100);.53	2.2578	-5.63167	2.30784	-2.44023	0.0146778	0.0485253
k__Bacteria(100);p__Firmicutes(100);c__Clostridia(100);o__Clostridiales(100);f__Christensenellaceae(100);f__Christensenellaceae_unclassified(100);f__Christensenellaceae_unclassified(100);.8	6.41262	-5.63136	1.57147	-3.5835	0.000339016	0.00221853
k__Bacteria(100);p__Firmicutes(100);c__Erysipelotrichi(100);o__Erysipelotrichales(100);f__Erysipelotrichaceae(100);f__Erysipelotrichaceae_unclassified(100);f__Erysipelotrichaceae_unclassified(100);.8	1.37028	-5.62627	2.01608	-2.7907	0.0052594	0.0211849
k__Bacteria(100);p__Firmicutes(100);p__Firmicutes_unclassified(100);p__Firmicutes_unclassified(100);p__Firmicutes_unclassified(100);p__Firmicutes_unclassified(100);p__Firmicutes_unclassified(100);.61	2.88643	-5.60398	1.41723	-3.95417	7.68022e-05	0.000642392
k__Bacteria(100);p__Planctomycetes(100);c__Planctomycetia(100);o__Pirellulales(100);f__Pirellulaceae(100);f__Pirellulaceae_unclassified(100);f__Pirellulaceae_unclassified(100);.12	6.85706	-5.59496	1.00644	-5.55914	2.71114e-08	6.28288e-07
k__Bacteria(100);p__Proteobacteria(100);c__Alphaproteobacteria(100);c__Alphaproteobacteria_unclassified(100);c__Alphaproteobacteria_unclassified(100);c__Alphaproteobacteria_unclassified(100);c__Alphaproteobacteria_unclassified(100);.12	1.34101	-5.54859	1.84294	-3.01073	0.00260624	0.0123053
k__Bacteria(100);p__Firmicutes(100);c__Clostridia(100);o__Clostridiales(100);o__Clostridiales_unclassified(100);o__Clostridiales_unclassified(100);o__Clostridiales_unclassified(100);.31	6.07479	-5.54761	1.73469	-3.19804	0.00138365	0.00720638
k__Bacteria(100);p__Bacteroidetes(100);p__Bacteroidetes_unclassified(100);p__Bacteroidetes_unclassified(100);p__Bacteroidetes_unclassified(100);p__Bacteroidetes_unclassified(100);p__Bacteroidetes_unclassified(100);.44	16.813	-5.53883	1.68544	-3.28629	0.00101518	0.00547938
k__Bacteria(100);p__Firmicutes(100);p__Firmicutes_unclassified(100);p__Firmicutes_unclassified(100);p__Firmicutes_unclassified(100);p__Firmicutes_unclassified(100);p__Firmicutes_unclassified(100);.75	1.61404	-5.52817	1.42973	-3.86658	0.000110373	0.000879501
k__Bacteria(100);k__Bacteria_unclassified(100);k__Bacteria_unclassified(100);k__Bacteria_unclassified(100);k__Bacteria_unclassified(100);k__Bacteria_unclassified(100);k__Bacteria_unclassified(100);.172	2.25628	-5.50424	1.94085	-2.836	0.00456822	0.0190733
k__Bacteria(100);p__Cyanobacteria(100);c__4C0d-2(100);o__YS2(100);o__YS2_unclassified(100);o__YS2_unclassified(100);o__YS2_unclassified(100);.3	2.72355	-5.5021	1.18472	-4.64421	3.41373e-06	4.61128e-05
k__Bacteria(100);p__Proteobacteria(100);c__Gammaproteobacteria(100);o__Pseudomonadales(100);f__Moraxellaceae(100);g__Acinetobacter(100);g__Acinetobacter_unclassified(100);	4.37634	-5.50111	2.03634	-2.70147	0.00690338	0.0258723
k__Bacteria(100);p__Bacteroidetes(100);c__Bacteroidia(100);o__Bacteroidales(100);f__Porphyromonadaceae(100);g__Dysgonomonas(100);g__Dysgonomonas_unclassified(100);.48	1.5091	-5.45272	1.86051	-2.93077	0.00338128	0.0150637
k__Bacteria(100);p__Firmicutes(100);c__Clostridia(100);o__Clostridiales(100);o__Clostridiales_unclassified(100);o__Clostridiales_unclassified(100);o__Clostridiales_unclassified(100);.60	1.55206	-5.45087	1.93073	-2.82321	0.00475452	0.0195814
k__Bacteria(100);p__Firmicutes(100);c__Clostridia(100);o__Clostridiales(100);f__Ruminococcaceae(100);f__Ruminococcaceae_unclassified(100);f__Ruminococcaceae_unclassified(100);.111	2.05508	-5.44814	1.87658	-2.90323	0.00369333	0.0161408
k__Bacteria(100);p__Firmicutes(100);c__Bacilli(100);o__Lactobacillales(100);f__Lactobacillaceae(100);g__Lactobacillus(100);g__Lactobacillus_unclassified(100);.3	2.28361	-5.41718	1.83909	-2.94559	0.00322344	0.014566
k__Bacteria(100);p__Planctomycetes(100);c__Planctomycetia(100);o__Pirellulales(100);f__Pirellulaceae(100);f__Pirellulaceae_unclassified(100);f__Pirellulaceae_unclassified(100);.23	1.51828	-5.39314	1.64599	-3.27653	0.00105092	0.00564815
k__Bacteria(100);p__Firmicutes(100);c__Clostridia(100);o__Clostridiales(100);f__Lachnospiraceae(100);f__Lachnospiraceae_unclassified(100);f__Lachnospiraceae_unclassified(100);.21	18.4164	-5.38578	1.53844	-3.50081	0.000463838	0.00286468
k__Bacteria(100);k__Bacteria_unclassified(100);k__Bacteria_unclassified(100);k__Bacteria_unclassified(100);k__Bacteria_unclassified(100);k__Bacteria_unclassified(100);k__Bacteria_unclassified(100);.138	2.74729	-5.38187	1.10037	-4.89099	1.00331e-06	1.57414e-05
k__Bacteria(100);p__Planctomycetes(100);c__Planctomycetia(100);o__Pirellulales(100);f__Pirellulaceae(100);f__Pirellulaceae_unclassified(100);f__Pirellulaceae_unclassified(100);.4	18.8255	-5.37806	0.712227	-7.55105	4.31769e-14	2.47875e-12
k__Bacteria(100);p__Bacteroidetes(100);p__Bacteroidetes_unclassified(100);p__Bacteroidetes_unclassified(100);p__Bacteroidetes_unclassified(100);p__Bacteroidetes_unclassified(100);p__Bacteroidetes_unclassified(100);.49	7.14864	-5.37754	1.71563	-3.13445	0.00172179	0.0086811
k__Bacteria(100);k__Bacteria_unclassified(100);k__Bacteria_unclassified(100);k__Bacteria_unclassified(100);k__Bacteria_unclassified(100);k__Bacteria_unclassified(100);k__Bacteria_unclassified(100);.174	1.52475	-5.37587	1.60468	-3.35012	0.000807753	0.00455443
k__Bacteria(100);p__Lentisphaerae(100);c__[Lentisphaeria](100);o__Victivallales(100);f__Victivallaceae(100);g__Victivallis(100);s__vadensis(100);.1	2.65525	-5.35532	1.81106	-2.957	0.00310645	0.0141131
k__Bacteria(100);p__Planctomycetes(100);c__Planctomycetia(100);o__Pirellulales(100);f__Pirellulaceae(100);f__Pirellulaceae_unclassified(100);f__Pirellulaceae_unclassified(100);.18	3.65917	-5.34459	1.06087	-5.03793	4.70584e-07	8.03173e-06
k__Bacteria(100);p__Bacteroidetes(100);p__Bacteroidetes_unclassified(100);p__Bacteroidetes_unclassified(100);p__Bacteroidetes_unclassified(100);p__Bacteroidetes_unclassified(100);p__Bacteroidetes_unclassified(100);.92	1.49373	-5.28009	0.940749	-5.61265	1.99256e-08	4.7483e-07
k__Bacteria(100);k__Bacteria_unclassified(100);k__Bacteria_unclassified(100);k__Bacteria_unclassified(100);k__Bacteria_unclassified(100);k__Bacteria_unclassified(100);k__Bacteria_unclassified(100);.201	1.17088	-5.27725	1.47686	-3.57329	0.00035252	0.0022716
k__Bacteria(100);p__Firmicutes(100);c__Clostridia(100);o__Clostridiales(100);f__Dehalobacteriaceae(99);g__Dehalobacterium(99);g__Dehalobacterium_unclassified(99);	2.23895	-5.27046	1.22644	-4.29736	1.72847e-05	0.000176766
k__Bacteria(100);p__Bacteroidetes(100);c__Bacteroidia(100);o__Bacteroidales(100);o__Bacteroidales_unclassified(100);o__Bacteroidales_unclassified(100);o__Bacteroidales_unclassified(100);.59	2.12209	-5.26492	1.9001	-2.77087	0.00559073	0.021963
k__Bacteria(100);p__Firmicutes(100);c__Clostridia(100);o__Clostridiales(100);f__Ruminococcaceae(100);f__Ruminococcaceae_unclassified(100);f__Ruminococcaceae_unclassified(100);.157	1.14603	-5.25533	1.98564	-2.64667	0.00812885	0.0295021
k__Bacteria(100);p__Bacteroidetes(100);c__Bacteroidia(100);o__Bacteroidales(100);f__Rikenellaceae(100);f__Rikenellaceae_unclassified(100);f__Rikenellaceae_unclassified(100);.51	7.1676	-5.25455	1.85039	-2.83969	0.00451568	0.0189164
k__Bacteria(100);p__Tenericutes(100);c__Mollicutes(100);o__RF39(100);o__RF39_unclassified(100);o__RF39_unclassified(100);o__RF39_unclassified(100);.31	1.26679	-5.24425	1.62699	-3.22329	0.00126728	0.00665521
k__Bacteria(100);p__Bacteroidetes(100);c__Bacteroidia(100);o__Bacteroidales(100);o__Bacteroidales_unclassified(64);o__Bacteroidales_unclassified(64);o__Bacteroidales_unclassified(64);	1.53626	-5.24421	1.9098	-2.74594	0.00603375	0.0231813
k__Bacteria(100);p__Firmicutes(100);c__Clostridia(100);o__Clostridiales(100);f__Ruminococcaceae(100);f__Ruminococcaceae_unclassified(100);f__Ruminococcaceae_unclassified(100);.97	3.43364	-5.23766	1.4352	-3.64943	0.000262821	0.00183902
k__Bacteria(100);k__Bacteria_unclassified(100);k__Bacteria_unclassified(100);k__Bacteria_unclassified(100);k__Bacteria_unclassified(100);k__Bacteria_unclassified(100);k__Bacteria_unclassified(100);.148	1.90919	-5.23351	1.81653	-2.88104	0.00396363	0.0170457
k__Bacteria(100);p__Bacteroidetes(100);c__Flavobacteriia(100);o__Flavobacteriales(100);o__Flavobacteriales_unclassified(100);o__Flavobacteriales_unclassified(100);o__Flavobacteriales_unclassified(100);	21.8221	-5.17438	1.55653	-3.3243	0.000886416	0.00489509
k__Bacteria(100);p__Firmicutes(100);c__Clostridia(100);o__Clostridiales(89);f__Christensenellaceae(89);f__Christensenellaceae_unclassified(89);f__Christensenellaceae_unclassified(89);	1.23351	-5.17426	1.67867	-3.08236	0.00205364	0.0100338
k__Bacteria(100);p__Firmicutes(100);c__Clostridia(100);c__Clostridia_unclassified(92);c__Clostridia_unclassified(92);c__Clostridia_unclassified(92);c__Clostridia_unclassified(92);	3.20754	-5.16339	1.83812	-2.80905	0.00496875	0.0201786
k__Bacteria(100);p__Bacteroidetes(100);c__Bacteroidia(100);o__Bacteroidales(100);f__Rikenellaceae(100);f__Rikenellaceae_unclassified(100);f__Rikenellaceae_unclassified(100);.28	20.9703	-5.15644	1.45063	-3.55461	0.000378533	0.00240985
k__Bacteria(100);p__Bacteroidetes(100);c__Bacteroidia(100);o__Bacteroidales(100);f__Rikenellaceae(100);f__Rikenellaceae_unclassified(100);f__Rikenellaceae_unclassified(100);.32	6.34277	-5.14007	1.78987	-2.87176	0.0040819	0.0173584
k__Bacteria(100);p__Proteobacteria(100);p__Proteobacteria_unclassified(100);p__Proteobacteria_unclassified(100);p__Proteobacteria_unclassified(100);p__Proteobacteria_unclassified(100);p__Proteobacteria_unclassified(100);.44	2.13702	-5.07098	1.69772	-2.98694	0.00281786	0.0131879
k__Bacteria(100);p__Bacteroidetes(100);c__Bacteroidia(100);o__Bacteroidales(100);f__Porphyromonadaceae(100);g__Candidatus_Azobacteroides(100);g__Candidatus_Azobacteroides_unclassified(100);.55	1.52034	-5.07054	1.93572	-2.61945	0.00880706	0.0315555
k__Bacteria(100);p__Planctomycetes(100);c__vadinHA49(100);o__PeHg47(100);o__PeHg47_unclassified(100);o__PeHg47_unclassified(100);o__PeHg47_unclassified(100);.15	12.5516	-5.05478	1.94664	-2.59667	0.00941331	0.0333961
k__Bacteria(100);p__Firmicutes(100);c__Clostridia(100);c__Clostridia_unclassified(100);c__Clostridia_unclassified(100);c__Clostridia_unclassified(100);c__Clostridia_unclassified(100);.7	0.983368	-5.05454	1.96442	-2.57304	0.010081	0.0352694
k__Bacteria(100);p__Firmicutes(100);c__Erysipelotrichi(100);o__Erysipelotrichales(100);f__Erysipelotrichaceae(100);g__Clostridium(100);g__Clostridium_unclassified(100);.2	8.34575	-5.0543	1.99795	-2.52974	0.0114147	0.0392827
k__Bacteria(100);k__Bacteria_unclassified(100);k__Bacteria_unclassified(100);k__Bacteria_unclassified(100);k__Bacteria_unclassified(100);k__Bacteria_unclassified(100);k__Bacteria_unclassified(100);.199	1.05945	-5.04132	1.51667	-3.32394	0.00088755	0.00489509
k__Bacteria(100);p__Tenericutes(100);c__Mollicutes(100);o__Acholeplasmatales(100);f__Acholeplasmataceae(100);g__Acholeplasma(100);g__Acholeplasma_unclassified(100);.5	3.58107	-5.03924	1.8342	-2.74737	0.00600748	0.0231813
k__Bacteria(100);p__Proteobacteria(100);c__Deltaproteobacteria(100);o__Desulfovibrionales(100);o__Desulfovibrionales_unclassified(99);o__Desulfovibrionales_unclassified(99);o__Desulfovibrionales_unclassified(99);	3.51748	-5.01354	1.26683	-3.95756	7.57192e-05	0.000635438
k__Bacteria(100);p__Proteobacteria(100);c__Gammaproteobacteria(100);o__Pseudomonadales(100);f__Moraxellaceae(100);g__Acinetobacter(100);g__Acinetobacter_unclassified(100);.1	1.16797	-4.98335	2.02601	-2.45969	0.0139058	0.0464015
k__Bacteria(100);k__Bacteria_unclassified(100);k__Bacteria_unclassified(100);k__Bacteria_unclassified(100);k__Bacteria_unclassified(100);k__Bacteria_unclassified(100);k__Bacteria_unclassified(100);.123	3.81439	-4.9751	1.15497	-4.30755	1.65069e-05	0.00017159
k__Bacteria(100);p__Proteobacteria(100);c__Deltaproteobacteria(100);o__Desulfovibrionales(100);f__Desulfovibrionaceae(100);g__Desulfovibrio(100);g__Desulfovibrio_unclassified(100);.28	1.35501	-4.9662	1.40313	-3.53937	0.000401076	0.00252648
k__Bacteria(100);k__Bacteria_unclassified(100);k__Bacteria_unclassified(100);k__Bacteria_unclassified(100);k__Bacteria_unclassified(100);k__Bacteria_unclassified(100);k__Bacteria_unclassified(100);.205	1.03553	-4.95798	1.66308	-2.9812	0.00287118	0.013332
k__Bacteria(100);p__Firmicutes(100);p__Firmicutes_unclassified(100);p__Firmicutes_unclassified(100);p__Firmicutes_unclassified(100);p__Firmicutes_unclassified(100);p__Firmicutes_unclassified(100);.85	1.91035	-4.95542	1.45413	-3.40781	0.000654855	0.00386487
k__Bacteria(100);p__Bacteroidetes(100);c__Bacteroidia(100);o__Bacteroidales(100);f__Rikenellaceae(100);f__Rikenellaceae_unclassified(100);f__Rikenellaceae_unclassified(100);.46	5.97392	-4.95237	1.62839	-3.04127	0.00235581	0.0113348
k__Bacteria(100);p__Verrucomicrobia(100);c__Opitutae(100);o__Opitutales(100);f__Opitutaceae(100);g__Opitutus(100);g__Opitutus_unclassified(100);.2	2.78356	-4.95134	1.37899	-3.59055	0.00032998	0.00217065
k__Bacteria(100);p__Bacteroidetes(100);c__Bacteroidia(100);o__Bacteroidales(100);f__Porphyromonadaceae(100);g__Candidatus_Azobacteroides(100);g__Candidatus_Azobacteroides_unclassified(100);.46	4.43214	-4.93467	1.77815	-2.77517	0.0055173	0.0218444
k__Bacteria(100);p__Bacteroidetes(100);c__Bacteroidia(100);o__Bacteroidales(100);o__Bacteroidales_unclassified(100);o__Bacteroidales_unclassified(100);o__Bacteroidales_unclassified(100);.54	3.52197	-4.93097	1.66481	-2.96187	0.00305774	0.0140433
k__Bacteria(100);p__Firmicutes(100);c__Clostridia(100);o__Clostridiales(95);o__Clostridiales_unclassified(95);o__Clostridiales_unclassified(95);o__Clostridiales_unclassified(95);.1	0.917638	-4.92667	1.91831	-2.56823	0.0102219	0.0356146
k__Bacteria(100);p__Bacteroidetes(100);c__Bacteroidia(100);o__Bacteroidales(100);f__Porphyromonadaceae(100);g__Candidatus_Azobacteroides(100);g__Candidatus_Azobacteroides_unclassified(100);.56	1.19494	-4.91132	1.91937	-2.55882	0.0105027	0.036392
k__Bacteria(100);k__Bacteria_unclassified(100);k__Bacteria_unclassified(100);k__Bacteria_unclassified(100);k__Bacteria_unclassified(100);k__Bacteria_unclassified(100);k__Bacteria_unclassified(100);.61	18.182	-4.91101	1.77596	-2.76527	0.0056875	0.0222738
k__Bacteria(100);k__Bacteria_unclassified(100);k__Bacteria_unclassified(100);k__Bacteria_unclassified(100);k__Bacteria_unclassified(100);k__Bacteria_unclassified(100);k__Bacteria_unclassified(100);.159	2.93851	-4.90661	1.97081	-2.48964	0.0127874	0.043183
k__Bacteria(100);k__Bacteria_unclassified(100);k__Bacteria_unclassified(100);k__Bacteria_unclassified(100);k__Bacteria_unclassified(100);k__Bacteria_unclassified(100);k__Bacteria_unclassified(100);.242	0.886871	-4.89568	1.73206	-2.82651	0.00470588	0.0194551
k__Bacteria(100);p__Firmicutes(100);c__Clostridia(100);o__Clostridiales(100);o__Clostridiales_unclassified(100);o__Clostridiales_unclassified(100);o__Clostridiales_unclassified(100);.48	2.12874	-4.8889	1.97696	-2.47294	0.0134008	0.0448945
k__Bacteria(100);p__Lentisphaerae(100);c__[Lentisphaeria](100);o__Victivallales(100);f__Victivallaceae(100);g__Victivallis(100);s__vadensis(100);	4.22157	-4.88676	1.82703	-2.67471	0.0074794	0.0275007
k__Bacteria(100);p__Proteobacteria(100);c__Alphaproteobacteria(100);o__Rickettsiales(100);f__Pelagibacteraceae(100);f__Pelagibacteraceae_unclassified(100);f__Pelagibacteraceae_unclassified(100);	3.25857	-4.86111	0.791309	-6.14312	8.09141e-10	2.60479e-08
k__Bacteria(100);p__Deferribacteres(100);c__Deferribacteres(100);o__Deferribacterales(100);f__Deferribacteraceae(100);f__Deferribacteraceae_unclassified(100);f__Deferribacteraceae_unclassified(100);.2	2.65994	-4.85726	1.34581	-3.60917	0.000307177	0.00206915
k__Bacteria(100);p__Firmicutes(100);c__Clostridia(100);o__Clostridiales(100);f__Ruminococcaceae(100);f__Ruminococcaceae_unclassified(100);f__Ruminococcaceae_unclassified(100);.134	1.99209	-4.84523	1.41278	-3.42958	0.000604525	0.00363334
k__Bacteria(100);p__Bacteroidetes(100);c__Bacteroidia(100);o__Bacteroidales(100);f__Porphyromonadaceae(100);g__Candidatus_Azobacteroides(100);g__Candidatus_Azobacteroides_unclassified(100);.47	3.47317	-4.84352	1.62203	-2.9861	0.00282564	0.0131933
k__Bacteria(100);p__Actinobacteria(100);c__Actinobacteria(100);o__Actinomycetales(100);f__Microbacteriaceae(100);g__Agromyces(100);s__mediolanus(70);	0.820549	-4.83974	1.72213	-2.81033	0.00494905	0.0201309
k__Bacteria(100);k__Bacteria_unclassified(100);k__Bacteria_unclassified(100);k__Bacteria_unclassified(100);k__Bacteria_unclassified(100);k__Bacteria_unclassified(100);k__Bacteria_unclassified(100);.94	4.06001	-4.83289	0.990583	-4.87883	1.06717e-06	1.6437e-05
k__Bacteria(100);p__Lentisphaerae(100);c__[Lentisphaeria](100);o__Victivallales(100);f__Victivallaceae(100);f__Victivallaceae_unclassified(100);f__Victivallaceae_unclassified(100);.3	13.4999	-4.83236	1.16324	-4.15422	3.26402e-05	0.000306502
k__Bacteria(100);p__Bacteroidetes(100);c__Bacteroidia(100);o__Bacteroidales(100);f__Rikenellaceae(100);f__Rikenellaceae_unclassified(100);f__Rikenellaceae_unclassified(100);.88	1.23221	-4.82073	1.56436	-3.08159	0.00205896	0.0100404
k__Bacteria(100);p__Proteobacteria(100);c__Epsilonproteobacteria(100);o__Campylobacterales(100);f__Campylobacteraceae(100);g__Arcobacter(100);s__cryaerophilus(100);	53.518	-4.81533	1.62806	-2.95771	0.00309935	0.0141131
k__Bacteria(100);p__Bacteroidetes(100);c__Bacteroidia(100);o__Bacteroidales(100);f__Porphyromonadaceae(100);g__Paludibacter(100);g__Paludibacter_unclassified(100);.22	5.82793	-4.80641	1.38677	-3.4659	0.000528454	0.00321657
k__Bacteria(100);p__Firmicutes(100);p__Firmicutes_unclassified(100);p__Firmicutes_unclassified(100);p__Firmicutes_unclassified(100);p__Firmicutes_unclassified(100);p__Firmicutes_unclassified(100);.66	2.4938	-4.80186	1.63528	-2.93642	0.00332023	0.0148704
k__Bacteria(100);k__Bacteria_unclassified(100);k__Bacteria_unclassified(100);k__Bacteria_unclassified(100);k__Bacteria_unclassified(100);k__Bacteria_unclassified(100);k__Bacteria_unclassified(100);.212	1.05421	-4.80169	1.55139	-3.09508	0.00196758	0.0096507
k__Bacteria(100);p__Bacteroidetes(100);c__Bacteroidia(100);o__Bacteroidales(100);f__Porphyromonadaceae(100);g__Paludibacter(100);g__Paludibacter_unclassified(100);.5	62.156	-4.79794	1.42054	-3.37755	0.000731354	0.0042082
k__Bacteria(100);k__Bacteria_unclassified(100);k__Bacteria_unclassified(100);k__Bacteria_unclassified(100);k__Bacteria_unclassified(100);k__Bacteria_unclassified(100);k__Bacteria_unclassified(100);.23	26.6933	-4.79508	1.05743	-4.53467	5.76947e-06	7.00658e-05
k__Bacteria(100);p__Bacteroidetes(100);c__Bacteroidia(100);o__Bacteroidales(100);f__Porphyromonadaceae(100);f__Porphyromonadaceae_unclassified(79);f__Porphyromonadaceae_unclassified(79);	13.7958	-4.79171	1.21021	-3.95942	7.51326e-05	0.000632616
k__Bacteria(100);p__Proteobacteria(100);c__Alphaproteobacteria(100);c__Alphaproteobacteria_unclassified(100);c__Alphaproteobacteria_unclassified(100);c__Alphaproteobacteria_unclassified(100);c__Alphaproteobacteria_unclassified(100);.1	12.2114	-4.77025	1.40187	-3.40278	0.000667028	0.0039184
k__Bacteria(100);p__Firmicutes(100);c__Clostridia(100);o__Clostridiales(100);o__Clostridiales_unclassified(100);o__Clostridiales_unclassified(100);o__Clostridiales_unclassified(100);.41	4.48025	-4.76968	1.04964	-4.54411	5.51681e-06	6.7366e-05
k__Bacteria(100);p__Firmicutes(100);c__Clostridia(100);c__Clostridia_unclassified(100);c__Clostridia_unclassified(100);c__Clostridia_unclassified(100);c__Clostridia_unclassified(100);.5	2.43955	-4.76957	0.942473	-5.06069	4.17732e-07	7.27719e-06
k__Bacteria(100);p__Bacteroidetes(100);c__Bacteroidia(100);o__Bacteroidales(100);f__Porphyromonadaceae(100);g__Candidatus_Azobacteroides(100);g__Candidatus_Azobacteroides_unclassified(100);.21	18.079	-4.73459	1.61042	-2.93997	0.00328244	0.0147798
k__Bacteria(100);p__Bacteroidetes(100);p__Bacteroidetes_unclassified(100);p__Bacteroidetes_unclassified(100);p__Bacteroidetes_unclassified(100);p__Bacteroidetes_unclassified(100);p__Bacteroidetes_unclassified(100);.27	27.2356	-4.73138	0.824729	-5.73689	9.64315e-09	2.51025e-07
k__Bacteria(100);p__Bacteroidetes(100);p__Bacteroidetes_unclassified(100);p__Bacteroidetes_unclassified(100);p__Bacteroidetes_unclassified(100);p__Bacteroidetes_unclassified(100);p__Bacteroidetes_unclassified(100);.34	14.2185	-4.73041	1.6007	-2.95521	0.0031246	0.0141701
k__Bacteria(100);p__Proteobacteria(100);c__TA18(100);o__CV90(100);o__CV90_unclassified(100);o__CV90_unclassified(100);o__CV90_unclassified(100);	0.851969	-4.72403	1.83403	-2.57576	0.0100021	0.0350419
k__Bacteria(100);p__Bacteroidetes(100);c__Bacteroidia(100);o__Bacteroidales(100);f__Rikenellaceae(100);f__Rikenellaceae_unclassified(100);f__Rikenellaceae_unclassified(100);.67	2.84796	-4.70963	1.73375	-2.71645	0.00659859	0.0250271
k__Bacteria(100);k__Bacteria_unclassified(100);k__Bacteria_unclassified(100);k__Bacteria_unclassified(100);k__Bacteria_unclassified(100);k__Bacteria_unclassified(100);k__Bacteria_unclassified(100);.181	1.36764	-4.69256	1.23349	-3.80429	0.000142209	0.00108855
k__Bacteria(100);p__Firmicutes(100);p__Firmicutes_unclassified(100);p__Firmicutes_unclassified(100);p__Firmicutes_unclassified(100);p__Firmicutes_unclassified(100);p__Firmicutes_unclassified(100);.60	2.78997	-4.68832	1.18599	-3.9531	7.71457e-05	0.000643135
k__Bacteria(100);p__Firmicutes(100);c__Clostridia(100);o__Clostridiales(100);o__Clostridiales_unclassified(79);o__Clostridiales_unclassified(79);o__Clostridiales_unclassified(79);	7.80624	-4.68801	1.2979	-3.61199	0.00030385	0.00205771
k__Bacteria(100);p__Proteobacteria(100);c__Alphaproteobacteria(100);o__RF32(100);o__RF32_unclassified(100);o__RF32_unclassified(100);o__RF32_unclassified(100);.7	6.00096	-4.65718	1.23737	-3.76377	0.000167372	0.00125828
k__Bacteria(100);p__Firmicutes(100);c__Bacilli(100);o__Lactobacillales(100);f__Lactobacillaceae(100);g__Pediococcus(100);s__acidilactici(99);	2.18522	-4.63393	1.55658	-2.977	0.00291083	0.0134666
k__Bacteria(100);p__Planctomycetes(100);c__Planctomycetia(100);o__Pirellulales(100);f__Pirellulaceae(100);f__Pirellulaceae_unclassified(100);f__Pirellulaceae_unclassified(100);.7	16.2167	-4.59242	0.868412	-5.28829	1.23465e-07	2.43651e-06
k__Bacteria(100);k__Bacteria_unclassified(100);k__Bacteria_unclassified(100);k__Bacteria_unclassified(100);k__Bacteria_unclassified(100);k__Bacteria_unclassified(100);k__Bacteria_unclassified(100);.183	1.63375	-4.59026	1.53832	-2.98393	0.00284569	0.0132624
k__Bacteria(100);p__Bacteroidetes(100);c__Bacteroidia(100);o__Bacteroidales(100);f__Rikenellaceae(100);f__Rikenellaceae_unclassified(100);f__Rikenellaceae_unclassified(100);.72	2.97692	-4.58239	1.40171	-3.26913	0.00107878	0.00576112
k__Bacteria(100);p__Cyanobacteria(100);c__4C0d-2(100);o__YS2(100);o__YS2_unclassified(100);o__YS2_unclassified(100);o__YS2_unclassified(100);.6	0.941185	-4.57236	1.81634	-2.51734	0.0118244	0.0404175
k__Bacteria(100);p__Firmicutes(100);c__Clostridia(100);o__Clostridiales(100);o__Clostridiales_unclassified(99);o__Clostridiales_unclassified(99);o__Clostridiales_unclassified(99);.4	4.41643	-4.56841	1.80407	-2.53228	0.0113323	0.0390525
k__Bacteria(100);k__Bacteria_unclassified(100);k__Bacteria_unclassified(100);k__Bacteria_unclassified(100);k__Bacteria_unclassified(100);k__Bacteria_unclassified(100);k__Bacteria_unclassified(100);.151	2.08585	-4.53168	1.34081	-3.37981	0.000725369	0.00418329
k__Bacteria(100);p__Cyanobacteria(100);c__4C0d-2(100);o__YS2(100);o__YS2_unclassified(100);o__YS2_unclassified(100);o__YS2_unclassified(100);.4	1.49659	-4.52544	1.59311	-2.84063	0.0045024	0.0188921
k__Bacteria(100);p__Bacteroidetes(100);c__Bacteroidia(100);o__Bacteroidales(100);f__Porphyromonadaceae(100);f__Porphyromonadaceae_unclassified(100);f__Porphyromonadaceae_unclassified(100);.24	7.02316	-4.48122	1.21021	-3.70284	0.000213198	0.00157008
k__Bacteria(100);p__Firmicutes(100);p__Firmicutes_unclassified(100);p__Firmicutes_unclassified(100);p__Firmicutes_unclassified(100);p__Firmicutes_unclassified(100);p__Firmicutes_unclassified(100);.104	0.721174	-4.47553	1.6088	-2.7819	0.0054041	0.0214741
k__Bacteria(100);p__Bacteroidetes(100);c__Bacteroidia(100);o__Bacteroidales(100);o__Bacteroidales_unclassified(100);o__Bacteroidales_unclassified(100);o__Bacteroidales_unclassified(100);.26	29.2471	-4.47383	1.49977	-2.983	0.00285435	0.0132782
k__Bacteria(100);p__Proteobacteria(100);c__Alphaproteobacteria(100);o__Rhodobacterales(100);f__Rhodobacteraceae(100);f__Rhodobacteraceae_unclassified(97);f__Rhodobacteraceae_unclassified(97);	1.38048	-4.46164	0.955026	-4.67175	2.98645e-06	4.07772e-05
k__Bacteria(100);p__Firmicutes(100);c__Clostridia(100);o__Clostridiales(100);f__Ruminococcaceae(100);f__Ruminococcaceae_unclassified(100);f__Ruminococcaceae_unclassified(100);.122	2.27507	-4.44501	1.20835	-3.67859	0.000234525	0.0016926
k__Bacteria(100);p__Synergistetes(100);c__Synergistia(100);o__Synergistales(100);f__Synergistaceae(100);g__Candidatus_Tammella(100);g__Candidatus_Tammella_unclassified(100);.11	3.29947	-4.43974	1.35628	-3.27347	0.00106235	0.00569746
k__Bacteria(100);p__Firmicutes(100);c__Clostridia(100);o__Clostridiales(100);f__Ruminococcaceae(100);f__Ruminococcaceae_unclassified(100);f__Ruminococcaceae_unclassified(100);.176	1.26561	-4.43705	1.55954	-2.84511	0.00443968	0.018691
k__Bacteria(100);p__Firmicutes(100);p__Firmicutes_unclassified(100);p__Firmicutes_unclassified(100);p__Firmicutes_unclassified(100);p__Firmicutes_unclassified(100);p__Firmicutes_unclassified(100);.5	57.8456	-4.43001	0.774251	-5.72167	1.05485e-08	2.66455e-07
k__Bacteria(100);p__Bacteroidetes(100);c__Bacteroidia(100);o__Bacteroidales(100);f__Rikenellaceae(100);f__Rikenellaceae_unclassified(100);f__Rikenellaceae_unclassified(100);.82	1.64728	-4.41867	1.49403	-2.95755	0.00310094	0.0141131
k__Bacteria(100);k__Bacteria_unclassified(100);k__Bacteria_unclassified(100);k__Bacteria_unclassified(100);k__Bacteria_unclassified(100);k__Bacteria_unclassified(100);k__Bacteria_unclassified(100);.165	1.90137	-4.40125	1.39505	-3.1549	0.00160553	0.00820965
k__Bacteria(100);p__Actinobacteria(100);c__Acidimicrobiia(100);o__Acidimicrobiales(100);f__OCS155(100);f__OCS155_unclassified(100);f__OCS155_unclassified(100);	2.01936	-4.39404	0.972997	-4.51599	6.30224e-06	7.54476e-05
k__Bacteria(100);p__Proteobacteria(100);c__Alphaproteobacteria(100);o__RF32(100);o__RF32_unclassified(100);o__RF32_unclassified(100);o__RF32_unclassified(100);.13	3.83291	-4.38796	1.33462	-3.28779	0.00100976	0.00547084
k__Bacteria(100);p__Planctomycetes(100);c__Planctomycetia(100);o__Pirellulales(100);f__Pirellulaceae(100);f__Pirellulaceae_unclassified(100);f__Pirellulaceae_unclassified(100);.19	5.02068	-4.35122	1.2567	-3.46241	0.000535354	0.00325073
k__Bacteria(100);k__Bacteria_unclassified(100);k__Bacteria_unclassified(100);k__Bacteria_unclassified(100);k__Bacteria_unclassified(100);k__Bacteria_unclassified(100);k__Bacteria_unclassified(100);.113	3.76534	-4.34395	0.758368	-5.72802	1.01611e-08	2.59262e-07
k__Bacteria(100);p__Bacteroidetes(100);c__Bacteroidia(100);o__Bacteroidales(100);f__Rikenellaceae(97);f__Rikenellaceae_unclassified(97);f__Rikenellaceae_unclassified(97);	14.9529	-4.33706	1.43344	-3.02563	0.00248114	0.011803
k__Bacteria(100);p__Firmicutes(100);c__Clostridia(100);o__Clostridiales(100);o__Clostridiales_unclassified(100);o__Clostridiales_unclassified(100);o__Clostridiales_unclassified(100);.58	2.02936	-4.33192	0.948404	-4.56759	4.93369e-06	6.10906e-05
k__Bacteria(100);k__Bacteria_unclassified(100);k__Bacteria_unclassified(100);k__Bacteria_unclassified(100);k__Bacteria_unclassified(100);k__Bacteria_unclassified(100);k__Bacteria_unclassified(100);.53	11.062	-4.31096	0.941922	-4.57677	4.72206e-06	5.90491e-05
k__Bacteria(100);p__Bacteroidetes(100);c__Bacteroidia(100);o__Bacteroidales(100);f__Porphyromonadaceae(100);g__Paludibacter(100);g__Paludibacter_unclassified(100);.14	15.4414	-4.28583	1.36939	-3.12974	0.0017496	0.00876883
k__Bacteria(100);p__Firmicutes(100);c__Clostridia(100);o__Clostridiales(97);f__Ruminococcaceae(92);f__Ruminococcaceae_unclassified(92);f__Ruminococcaceae_unclassified(92);	4.81073	-4.28214	0.898257	-4.76716	1.86841e-06	2.69692e-05
k__Bacteria(100);k__Bacteria_unclassified(100);k__Bacteria_unclassified(100);k__Bacteria_unclassified(100);k__Bacteria_unclassified(100);k__Bacteria_unclassified(100);k__Bacteria_unclassified(100);.128	4.07252	-4.23026	1.32038	-3.20381	0.00135622	0.00707811
k__Bacteria(100);p__Proteobacteria(100);p__Proteobacteria_unclassified(100);p__Proteobacteria_unclassified(100);p__Proteobacteria_unclassified(100);p__Proteobacteria_unclassified(100);p__Proteobacteria_unclassified(100);.21	6.28435	-4.22547	1.53627	-2.75047	0.00595093	0.0230553
k__Bacteria(100);p__Planctomycetes(100);c__Planctomycetia(100);o__Pirellulales(100);f__Pirellulaceae(100);f__Pirellulaceae_unclassified(100);f__Pirellulaceae_unclassified(100);.3	31.4227	-4.18898	0.615707	-6.80353	1.02085e-11	4.52398e-10
k__Bacteria(100);k__Bacteria_unclassified(100);k__Bacteria_unclassified(100);k__Bacteria_unclassified(100);k__Bacteria_unclassified(100);k__Bacteria_unclassified(100);k__Bacteria_unclassified(100);.173	1.53647	-4.18637	1.71379	-2.44276	0.0145755	0.0482539
k__Bacteria(100);p__Firmicutes(100);c__Clostridia(100);o__Clostridiales(100);o__Clostridiales_unclassified(100);o__Clostridiales_unclassified(100);o__Clostridiales_unclassified(100);.101	0.690596	-4.18508	1.71796	-2.43607	0.0148476	0.0488347
k__Bacteria(100);p__Proteobacteria(100);c__Deltaproteobacteria(100);c__Deltaproteobacteria_unclassified(100);c__Deltaproteobacteria_unclassified(100);c__Deltaproteobacteria_unclassified(100);c__Deltaproteobacteria_unclassified(100);.2	9.44478	-4.163	1.30336	-3.19405	0.00140293	0.00727682
k__Bacteria(100);p__Proteobacteria(100);c__Deltaproteobacteria(100);o__Desulfovibrionales(99);o__Desulfovibrionales_unclassified(99);o__Desulfovibrionales_unclassified(99);o__Desulfovibrionales_unclassified(99);.1	1.238	-4.15707	1.30035	-3.19689	0.0013892	0.00722041
k__Bacteria(100);p__Firmicutes(100);p__Firmicutes_unclassified(100);p__Firmicutes_unclassified(100);p__Firmicutes_unclassified(100);p__Firmicutes_unclassified(100);p__Firmicutes_unclassified(100);.31	7.3074	-4.1425	1.15353	-3.59116	0.000329213	0.00217065
k__Bacteria(100);p__Firmicutes(100);c__Clostridia(100);o__Clostridiales(100);f__Ruminococcaceae(54);f__Ruminococcaceae_unclassified(54);f__Ruminococcaceae_unclassified(54);	4.04934	-4.13124	1.36008	-3.03751	0.00238545	0.0114556
k__Bacteria(100);p__Firmicutes(100);c__Clostridia(100);o__Clostridiales(100);f__Ruminococcaceae(100);g__Ruminococcus(100);g__Ruminococcus_unclassified(100);.3	48.0348	-4.1122	0.813596	-5.05435	4.31848e-07	7.47156e-06
k__Bacteria(100);p__Actinobacteria(100);c__Actinobacteria(100);o__Actinomycetales(100);f__Mycobacteriaceae(100);g__Mycobacterium(100);g__Mycobacterium_unclassified(56);	0.991702	-4.10896	1.35448	-3.03361	0.00241649	0.0115607
k__Bacteria(100);p__Proteobacteria(100);c__Gammaproteobacteria(100);o__Oceanospirillales(100);f__Halomonadaceae(100);g__Candidatus_Portiera(100);g__Candidatus_Portiera_unclassified(100);	1.56239	-4.08738	0.905686	-4.51303	6.39089e-06	7.59255e-05
k__Bacteria(100);k__Bacteria_unclassified(100);k__Bacteria_unclassified(100);k__Bacteria_unclassified(100);k__Bacteria_unclassified(100);k__Bacteria_unclassified(100);k__Bacteria_unclassified(100);.111	5.24978	-4.0867	1.41999	-2.87799	0.00400222	0.0171349
k__Bacteria(100);p__Planctomycetes(100);c__Planctomycetia(100);o__Pirellulales(100);f__Pirellulaceae(100);f__Pirellulaceae_unclassified(100);f__Pirellulaceae_unclassified(100);.5	17.5462	-4.07495	0.67562	-6.03143	1.62513e-09	4.77336e-08
k__Bacteria(100);k__Bacteria_unclassified(100);k__Bacteria_unclassified(100);k__Bacteria_unclassified(100);k__Bacteria_unclassified(100);k__Bacteria_unclassified(100);k__Bacteria_unclassified(100);.133	2.82961	-4.06413	0.937225	-4.33634	1.44874e-05	0.000155725
k__Bacteria(100);k__Bacteria_unclassified(100);k__Bacteria_unclassified(100);k__Bacteria_unclassified(100);k__Bacteria_unclassified(100);k__Bacteria_unclassified(100);k__Bacteria_unclassified(100);.59	9.26094	-4.04608	0.674242	-6.00092	1.96197e-09	5.63175e-08
k__Bacteria(100);p__Firmicutes(100);c__Clostridia(100);o__Clostridiales(100);f__Ruminococcaceae(100);f__Ruminococcaceae_unclassified(100);f__Ruminococcaceae_unclassified(100);.126	2.50732	-4.0341	1.23749	-3.25991	0.00111448	0.00593921
k__Bacteria(100);p__Bacteroidetes(100);c__Bacteroidia(100);o__Bacteroidales(100);o__Bacteroidales_unclassified(100);o__Bacteroidales_unclassified(100);o__Bacteroidales_unclassified(100);.79	0.696686	-4.0297	1.43266	-2.81275	0.00491203	0.0200125
k__Bacteria(100);p__Proteobacteria(100);c__Deltaproteobacteria(100);c__Deltaproteobacteria_unclassified(88);c__Deltaproteobacteria_unclassified(88);c__Deltaproteobacteria_unclassified(88);c__Deltaproteobacteria_unclassified(88);	0.946365	-3.98383	1.31577	-3.02776	0.00246374	0.0117423
k__Bacteria(100);p__Firmicutes(100);c__Clostridia(100);o__Clostridiales(100);o__Clostridiales_unclassified(100);o__Clostridiales_unclassified(100);o__Clostridiales_unclassified(100);.35	5.7395	-3.98122	1.31285	-3.0325	0.00242535	0.0115812
k__Bacteria(100);p__Proteobacteria(100);p__Proteobacteria_unclassified(100);p__Proteobacteria_unclassified(100);p__Proteobacteria_unclassified(100);p__Proteobacteria_unclassified(100);p__Proteobacteria_unclassified(100);.59	1.05325	-3.97256	1.34097	-2.96246	0.00305196	0.0140424
k__Bacteria(100);p__Proteobacteria(100);c__Alphaproteobacteria(100);o__Rickettsiales(100);f__Pelagibacteraceae(100);f__Pelagibacteraceae_unclassified(100);f__Pelagibacteraceae_unclassified(100);.1	1.29629	-3.97018	0.905804	-4.38304	1.17032e-05	0.000130231
k__Bacteria(100);p__Planctomycetes(100);c__vadinHA49(100);o__PeHg47(100);o__PeHg47_unclassified(100);o__PeHg47_unclassified(100);o__PeHg47_unclassified(100);.8	8.56399	-3.95796	0.750171	-5.27608	1.31979e-07	2.56445e-06
k__Bacteria(100);p__Planctomycetes(100);c__Planctomycetia(100);o__Pirellulales(100);f__Pirellulaceae(100);f__Pirellulaceae_unclassified(100);f__Pirellulaceae_unclassified(100);.9	10.6239	-3.95019	0.87794	-4.49938	6.81511e-06	7.96989e-05
k__Bacteria(100);p__Elusimicrobia(100);c__Endomicrobia(100);c__Endomicrobia_unclassified(100);c__Endomicrobia_unclassified(100);c__Endomicrobia_unclassified(100);c__Endomicrobia_unclassified(100);.11	1.9389	-3.91522	1.16093	-3.37248	0.000744948	0.00426698
k__Bacteria(100);p__Firmicutes(100);p__Firmicutes_unclassified(100);p__Firmicutes_unclassified(100);p__Firmicutes_unclassified(100);p__Firmicutes_unclassified(100);p__Firmicutes_unclassified(100);.88	1.23879	-3.9137	1.12488	-3.47923	0.000502859	0.00309057
k__Bacteria(100);p__Proteobacteria(100);c__Gammaproteobacteria(100);o__Alteromonadales(100);f__OM60(100);f__OM60_unclassified(100);f__OM60_unclassified(100);	1.10285	-3.90594	1.38035	-2.82967	0.00465963	0.0193589
k__Bacteria(100);k__Bacteria_unclassified(100);k__Bacteria_unclassified(100);k__Bacteria_unclassified(100);k__Bacteria_unclassified(100);k__Bacteria_unclassified(100);k__Bacteria_unclassified(100);.136	2.49765	-3.88985	0.976806	-3.98222	6.82756e-05	0.000585511
k__Bacteria(100);p__Bacteroidetes(100);p__Bacteroidetes_unclassified(100);p__Bacteroidetes_unclassified(100);p__Bacteroidetes_unclassified(100);p__Bacteroidetes_unclassified(100);p__Bacteroidetes_unclassified(100);.107	0.794958	-3.8713	1.38896	-2.78719	0.00531671	0.0212837
k__Bacteria(100);p__Planctomycetes(100);c__Planctomycetia(100);o__Pirellulales(100);f__Pirellulaceae(100);f__Pirellulaceae_unclassified(100);f__Pirellulaceae_unclassified(100);	62.5712	-3.85163	0.604569	-6.37087	1.87955e-10	6.98199e-09
k__Bacteria(100);p__Firmicutes(100);c__Clostridia(100);o__Clostridiales(100);f__Ruminococcaceae(98);f__Ruminococcaceae_unclassified(98);f__Ruminococcaceae_unclassified(98);.1	3.60934	-3.80631	1.37233	-2.77361	0.0055438	0.0218807
k__Bacteria(100);p__Bacteroidetes(100);c__Bacteroidia(100);o__Bacteroidales(100);f__Porphyromonadaceae(100);g__Paludibacter(100);g__Paludibacter_unclassified(100);.11	20.4742	-3.79564	1.27006	-2.98855	0.00280301	0.0131606
k__Bacteria(100);p__Firmicutes(100);c__Clostridia(100);o__Clostridiales(96);o__Clostridiales_unclassified(96);o__Clostridiales_unclassified(96);o__Clostridiales_unclassified(96);	2.2568	-3.79029	1.33805	-2.83269	0.00461575	0.0192082
k__Bacteria(100);p__Firmicutes(100);c__Clostridia(100);o__Clostridiales(100);f__Christensenellaceae(99);f__Christensenellaceae_unclassified(99);f__Christensenellaceae_unclassified(99);.8	0.904284	-3.75316	1.16268	-3.22803	0.00124648	0.00657329
k__Bacteria(100);p__Proteobacteria(100);c__Deltaproteobacteria(100);o__Desulfovibrionales(100);f__Desulfovibrionaceae(100);g__Desulfovibrio(100);g__Desulfovibrio_unclassified(61);.1	1.25114	-3.74048	1.02211	-3.65955	0.000252656	0.0017877
k__Bacteria(100);p__Firmicutes(100);p__Firmicutes_unclassified(100);p__Firmicutes_unclassified(100);p__Firmicutes_unclassified(100);p__Firmicutes_unclassified(100);p__Firmicutes_unclassified(100);.47	4.18839	-3.73557	1.50216	-2.48681	0.0128895	0.0434117
k__Bacteria(100);k__Bacteria_unclassified(100);k__Bacteria_unclassified(100);k__Bacteria_unclassified(100);k__Bacteria_unclassified(100);k__Bacteria_unclassified(100);k__Bacteria_unclassified(100);.162	1.72481	-3.72975	1.33669	-2.79029	0.0052661	0.0211849
k__Bacteria(100);p__Proteobacteria(100);c__Gammaproteobacteria(100);o__Pseudomonadales(100);f__Moraxellaceae(100);g__Acinetobacter(100);s__guillouiae(63);	40.0271	-3.68668	1.087	-3.39161	0.000694838	0.00403485
k__Bacteria(100);p__Firmicutes(100);c__Clostridia(100);o__Clostridiales(100);f__Ruminococcaceae(100);f__Ruminococcaceae_unclassified(100);f__Ruminococcaceae_unclassified(100);.72	4.95064	-3.68267	0.711455	-5.17625	2.26394e-07	4.23608e-06
k__Bacteria(100);p__Firmicutes(100);c__Clostridia(100);o__Clostridiales(100);o__Clostridiales_unclassified(100);o__Clostridiales_unclassified(100);o__Clostridiales_unclassified(100);.55	2.00394	-3.67063	1.24713	-2.94326	0.00324777	0.0146498
k__Bacteria(100);k__Bacteria_unclassified(100);k__Bacteria_unclassified(100);k__Bacteria_unclassified(100);k__Bacteria_unclassified(100);k__Bacteria_unclassified(100);k__Bacteria_unclassified(100);.80	5.6084	-3.66776	0.790444	-4.64013	3.48195e-06	4.67841e-05
k__Bacteria(100);p__Planctomycetes(100);c__Planctomycetia(100);o__Pirellulales(100);f__Pirellulaceae(100);f__Pirellulaceae_unclassified(100);f__Pirellulaceae_unclassified(100);.15	6.36769	-3.62845	1.02109	-3.5535	0.000380147	0.00241269
k__Bacteria(100);p__Bacteroidetes(100);c__Bacteroidia(100);o__Bacteroidales(100);f__Porphyromonadaceae(100);g__Candidatus_Azobacteroides(100);g__Candidatus_Azobacteroides_unclassified(100);.28	12.6637	-3.58283	1.22886	-2.91558	0.00355026	0.0157057
k__Bacteria(100);p__Bacteroidetes(100);c__Bacteroidia(100);o__Bacteroidales(100);f__Porphyromonadaceae(100);g__Dysgonomonas(100);g__Dysgonomonas_unclassified(86);	32.8298	-3.58201	0.99225	-3.60999	0.000306207	0.00206812
k__Bacteria(100);p__Cyanobacteria(100);c__Synechococcophycideae(100);o__Synechococcales(100);f__Synechococcaceae(100);g__Prochlorococcus(100);g__Prochlorococcus_unclassified(100);	1.36546	-3.57047	1.19838	-2.97942	0.00288791	0.0133851
k__Bacteria(100);p__Proteobacteria(100);p__Proteobacteria_unclassified(100);p__Proteobacteria_unclassified(100);p__Proteobacteria_unclassified(100);p__Proteobacteria_unclassified(100);p__Proteobacteria_unclassified(100);.78	0.945156	-3.5679	1.0653	-3.34919	0.000810489	0.00455478
k__Bacteria(100);p__Bacteroidetes(100);c__Bacteroidia(100);o__Bacteroidales(100);f__Porphyromonadaceae(100);g__Dysgonomonas(100);g__Dysgonomonas_unclassified(100);.21	10.5347	-3.55214	1.3091	-2.71342	0.00665921	0.0251814
k__Bacteria(100);p__SAR406(100);c__AB16(100);o__Arctic96B-7(100);f__A714017(100);g__ZA3312c(100);g__ZA3312c_unclassified(100);	0.798635	-3.54661	0.961416	-3.68894	0.000225186	0.00164248
k__Bacteria(100);p__Firmicutes(100);p__Firmicutes_unclassified(100);p__Firmicutes_unclassified(100);p__Firmicutes_unclassified(100);p__Firmicutes_unclassified(100);p__Firmicutes_unclassified(100);.108	0.615069	-3.53308	1.3005	-2.7167	0.00659368	0.0250271
k__Bacteria(100);p__Bacteroidetes(100);c__Bacteroidia(100);o__Bacteroidales(100);f__Porphyromonadaceae(100);g__Paludibacter(100);g__Paludibacter_unclassified(100);.6	47.2168	-3.52144	1.30448	-2.6995	0.00694446	0.0259645
k__Bacteria(100);p__Synergistetes(100);c__Synergistia(100);o__Synergistales(100);f__Synergistaceae(100);g__Candidatus_Tammella(100);g__Candidatus_Tammella_unclassified(100);.13	1.48513	-3.51496	1.40541	-2.50103	0.0123834	0.0420435
k__Bacteria(100);p__Firmicutes(100);c__Clostridia(100);o__Clostridiales(100);f__Ruminococcaceae(100);g__Ruminococcus(82);g__Ruminococcus_unclassified(82);	2.58629	-3.51425	1.35645	-2.59076	0.00957633	0.0339268
k__Bacteria(100);p__Proteobacteria(100);c__Deltaproteobacteria(100);o__Desulfovibrionales(99);f__Desulfovibrionaceae(78);g__Desulfovibrio(63);g__Desulfovibrio_unclassified(63);	11.7573	-3.48337	0.874811	-3.98186	6.83792e-05	0.000585511
k__Bacteria(100);p__Firmicutes(100);c__Clostridia(100);o__Clostridiales(100);f__Ruminococcaceae(100);f__Ruminococcaceae_unclassified(100);f__Ruminococcaceae_unclassified(100);.77	4.9389	-3.48238	1.31709	-2.644	0.00819329	0.0296508
k__Bacteria(100);p__Planctomycetes(100);c__Planctomycetia(100);o__Pirellulales(100);f__Pirellulaceae(100);f__Pirellulaceae_unclassified(100);f__Pirellulaceae_unclassified(100);.10	7.98828	-3.4622	0.883247	-3.91985	8.86041e-05	0.000729036
k__Bacteria(100);k__Bacteria_unclassified(100);k__Bacteria_unclassified(100);k__Bacteria_unclassified(100);k__Bacteria_unclassified(100);k__Bacteria_unclassified(100);k__Bacteria_unclassified(100);.219	1.00415	-3.43009	1.39878	-2.45219	0.0141988	0.0471923
k__Bacteria(100);p__Bacteroidetes(100);c__Bacteroidia(100);o__Bacteroidales(100);f__Rikenellaceae(100);f__Rikenellaceae_unclassified(100);f__Rikenellaceae_unclassified(100);.41	6.65018	-3.39304	0.977229	-3.4721	0.000516401	0.00315479
k__Bacteria(100);p__Firmicutes(100);c__Clostridia(100);o__Clostridiales(100);f__Ruminococcaceae(100);f__Ruminococcaceae_unclassified(100);f__Ruminococcaceae_unclassified(100);.128	2.62507	-3.38621	1.31125	-2.58243	0.00981063	0.0345149
k__Bacteria(100);p__Firmicutes(100);c__Clostridia(100);o__Clostridiales(100);f__Ruminococcaceae(100);f__Ruminococcaceae_unclassified(100);f__Ruminococcaceae_unclassified(100);.121	2.10294	-3.38205	0.710761	-4.75835	1.95185e-06	2.76988e-05
k__Bacteria(100);p__Firmicutes(100);c__Clostridia(100);o__Clostridiales(100);o__Clostridiales_unclassified(100);o__Clostridiales_unclassified(100);o__Clostridiales_unclassified(100);.10	23.7539	-3.37788	0.788373	-4.28463	1.83044e-05	0.000185691
k__Bacteria(100);p__Proteobacteria(100);c__Alphaproteobacteria(100);o__RF32(100);o__RF32_unclassified(100);o__RF32_unclassified(100);o__RF32_unclassified(100);.5	7.55981	-3.36299	1.29284	-2.60125	0.00928849	0.0330461
k__Bacteria(100);k__Bacteria_unclassified(100);k__Bacteria_unclassified(100);k__Bacteria_unclassified(100);k__Bacteria_unclassified(100);k__Bacteria_unclassified(100);k__Bacteria_unclassified(100);.62	10.6861	-3.35772	1.06848	-3.14253	0.00167495	0.00849583
k__Bacteria(100);p__Proteobacteria(100);p__Proteobacteria_unclassified(100);p__Proteobacteria_unclassified(100);p__Proteobacteria_unclassified(100);p__Proteobacteria_unclassified(100);p__Proteobacteria_unclassified(100);.45	2.16907	-3.35684	1.17788	-2.84991	0.00437319	0.0184727
k__Bacteria(100);p__Proteobacteria(100);p__Proteobacteria_unclassified(100);p__Proteobacteria_unclassified(100);p__Proteobacteria_unclassified(100);p__Proteobacteria_unclassified(100);p__Proteobacteria_unclassified(100);.34	3.40569	-3.35614	1.34094	-2.50283	0.0123206	0.0418866
k__Bacteria(100);p__Bacteroidetes(100);c__Flavobacteriia(100);o__Flavobacteriales(100);f__Flavobacteriaceae(100);f__Flavobacteriaceae_unclassified(100);f__Flavobacteriaceae_unclassified(100);	0.591156	-3.32052	1.20936	-2.74568	0.00603852	0.0231813
k__Bacteria(100);p__Firmicutes(100);c__Clostridia(100);o__Clostridiales(100);f__Ruminococcaceae(100);g__Ruminococcus(98);g__Ruminococcus_unclassified(98);	3.43365	-3.31942	1.00856	-3.29125	0.000997427	0.00541828
k__Bacteria(100);p__Proteobacteria(100);c__Alphaproteobacteria(100);o__Rhodospirillales(100);o__Rhodospirillales_unclassified(96);o__Rhodospirillales_unclassified(96);o__Rhodospirillales_unclassified(96);	0.775458	-3.31762	1.19688	-2.77189	0.00557317	0.0219623
k__Bacteria(100);p__Firmicutes(100);c__Clostridia(100);o__Clostridiales(100);o__Clostridiales_unclassified(65);o__Clostridiales_unclassified(65);o__Clostridiales_unclassified(65);	18.6561	-3.31493	0.833493	-3.97716	6.97437e-05	0.000595177
k__Bacteria(100);k__Bacteria_unclassified(100);k__Bacteria_unclassified(100);k__Bacteria_unclassified(100);k__Bacteria_unclassified(100);k__Bacteria_unclassified(100);k__Bacteria_unclassified(100);.132	3.43448	-3.30379	1.27829	-2.58454	0.00975097	0.0343528
k__Bacteria(100);p__Firmicutes(100);c__Clostridia(100);o__Clostridiales(100);f__Christensenellaceae(100);g__Christensenella(100);g__Christensenella_unclassified(100);.3	0.896203	-3.30304	1.24127	-2.66102	0.00779051	0.0286029
k__Bacteria(100);p__Planctomycetes(100);c__Planctomycetia(100);o__Pirellulales(100);f__Pirellulaceae(100);f__Pirellulaceae_unclassified(100);f__Pirellulaceae_unclassified(100);.1	44.093	-3.30096	0.59542	-5.54392	2.95767e-08	6.77621e-07
k__Bacteria(100);p__Bacteroidetes(100);c__Bacteroidia(100);o__Bacteroidales(100);f__Porphyromonadaceae(100);g__Paludibacter(100);g__Paludibacter_unclassified(100);.3	37.4827	-3.28627	1.18593	-2.77105	0.00558753	0.021963
k__Bacteria(100);p__Firmicutes(100);c__Clostridia(100);o__Clostridiales(100);f__Ruminococcaceae(100);g__Oscillospira(99);g__Oscillospira_unclassified(99);.2	2.35898	-3.26318	0.973465	-3.35213	0.000801918	0.00453164
k__Bacteria(100);p__Tenericutes(100);c__Mollicutes(100);o__RF39(96);o__RF39_unclassified(96);o__RF39_unclassified(96);o__RF39_unclassified(96);	2.62089	-3.24809	0.976769	-3.32534	0.000883098	0.0048919
k__Bacteria(100);p__Proteobacteria(100);c__Deltaproteobacteria(100);o__Desulfovibrionales(100);f__Desulfovibrionaceae(100);g__Desulfovibrio(100);g__Desulfovibrio_unclassified(100);.19	4.57383	-3.21698	0.832209	-3.86559	0.000110822	0.000880304
k__Bacteria(100);k__Bacteria_unclassified(100);k__Bacteria_unclassified(100);k__Bacteria_unclassified(100);k__Bacteria_unclassified(100);k__Bacteria_unclassified(100);k__Bacteria_unclassified(100);.119	3.70914	-3.21687	0.798007	-4.03113	5.55082e-05	0.000491978
k__Bacteria(100);p__Firmicutes(100);c__Clostridia(100);o__Clostridiales(100);f__Ruminococcaceae(96);f__Ruminococcaceae_unclassified(96);f__Ruminococcaceae_unclassified(96);	1.34038	-3.19035	0.740453	-4.30865	1.64256e-05	0.000171451
k__Bacteria(100);k__Bacteria_unclassified(100);k__Bacteria_unclassified(100);k__Bacteria_unclassified(100);k__Bacteria_unclassified(100);k__Bacteria_unclassified(100);k__Bacteria_unclassified(100);.120	3.97813	-3.1819	1.28462	-2.47692	0.0132521	0.0444553
k__Bacteria(100);p__Proteobacteria(100);p__Proteobacteria_unclassified(100);p__Proteobacteria_unclassified(100);p__Proteobacteria_unclassified(100);p__Proteobacteria_unclassified(100);p__Proteobacteria_unclassified(100);.30	3.76223	-3.15735	1.0899	-2.89692	0.00376845	0.0163819
k__Bacteria(100);p__Bacteroidetes(100);c__Bacteroidia(100);o__Bacteroidales(100);f__Rikenellaceae(100);f__Rikenellaceae_unclassified(100);f__Rikenellaceae_unclassified(100);.11	41.9734	-3.14092	1.13679	-2.76297	0.00572775	0.0223561
k__Bacteria(100);p__Proteobacteria(100);p__Proteobacteria_unclassified(100);p__Proteobacteria_unclassified(100);p__Proteobacteria_unclassified(100);p__Proteobacteria_unclassified(100);p__Proteobacteria_unclassified(100);.14	10.4533	-3.14092	0.632376	-4.96685	6.80501e-07	1.10189e-05
k__Bacteria(100);p__Firmicutes(100);c__Clostridia(100);o__Clostridiales(100);f__Veillonellaceae(100);f__Veillonellaceae_unclassified(100);f__Veillonellaceae_unclassified(100);.3	13.2628	-3.13782	0.728916	-4.30478	1.67155e-05	0.000173047
k__Bacteria(100);p__Bacteroidetes(100);p__Bacteroidetes_unclassified(100);p__Bacteroidetes_unclassified(100);p__Bacteroidetes_unclassified(100);p__Bacteroidetes_unclassified(100);p__Bacteroidetes_unclassified(100);.75	2.26553	-3.073	0.976892	-3.14569	0.00165694	0.00842139
k__Bacteria(100);p__Bacteroidetes(100);p__Bacteroidetes_unclassified(100);p__Bacteroidetes_unclassified(100);p__Bacteroidetes_unclassified(100);p__Bacteroidetes_unclassified(100);p__Bacteroidetes_unclassified(100);.16	100.179	-3.03944	0.706349	-4.30302	1.68483e-05	0.00017371
k__Bacteria(100);p__Firmicutes(100);c__Clostridia(100);o__Clostridiales(100);f__[Mogibacteriaceae](100);f__[Mogibacteriaceae]_unclassified(100);f__[Mogibacteriaceae]_unclassified(100);.2	23.8675	-3.02002	0.929754	-3.24819	0.00116141	0.00615038
k__Bacteria(100);p__Planctomycetes(100);c__vadinHA49(100);o__PeHg47(100);o__PeHg47_unclassified(100);o__PeHg47_unclassified(100);o__PeHg47_unclassified(100);.19	1.49273	-2.99418	1.11689	-2.68083	0.00734397	0.0272007
k__Bacteria(100);p__Firmicutes(100);c__Clostridia(100);o__Clostridiales(100);f__Ruminococcaceae(100);f__Ruminococcaceae_unclassified(100);f__Ruminococcaceae_unclassified(100);.175	0.970837	-2.97143	1.14073	-2.60486	0.00919127	0.0327926
k__Bacteria(100);p__Firmicutes(100);c__Clostridia(100);c__Clostridia_unclassified(100);c__Clostridia_unclassified(100);c__Clostridia_unclassified(100);c__Clostridia_unclassified(100);.4	2.55087	-2.95627	0.661366	-4.46994	7.82406e-06	8.9428e-05
k__Bacteria(100);p__Firmicutes(100);c__Clostridia(100);o__Clostridiales(100);o__Clostridiales_unclassified(83);o__Clostridiales_unclassified(83);o__Clostridiales_unclassified(83);.1	0.771649	-2.9518	1.09949	-2.6847	0.00725955	0.0269275
k__Bacteria(100);p__Firmicutes(100);c__Clostridia(100);o__Clostridiales(83);o__Clostridiales_unclassified(83);o__Clostridiales_unclassified(83);o__Clostridiales_unclassified(83);	0.831949	-2.90488	1.12524	-2.58155	0.00983566	0.0345548
k__Bacteria(100);p__Firmicutes(100);c__Clostridia(100);o__Clostridiales(100);f__Christensenellaceae(99);f__Christensenellaceae_unclassified(99);f__Christensenellaceae_unclassified(99);.2	2.92933	-2.89297	1.14748	-2.52115	0.0116973	0.0400916
k__Bacteria(100);p__Firmicutes(100);p__Firmicutes_unclassified(100);p__Firmicutes_unclassified(100);p__Firmicutes_unclassified(100);p__Firmicutes_unclassified(100);p__Firmicutes_unclassified(100);.10	28.8859	-2.88409	1.03171	-2.79544	0.00518295	0.0209474
k__Bacteria(100);p__Actinobacteria(100);c__Actinobacteria(100);o__Actinomycetales(100);o__Actinomycetales_unclassified(100);o__Actinomycetales_unclassified(100);o__Actinomycetales_unclassified(100);.1	6.10234	-2.85825	0.7736	-3.69474	0.000220113	0.00161161
k__Bacteria(100);p__Firmicutes(100);p__Firmicutes_unclassified(100);p__Firmicutes_unclassified(100);p__Firmicutes_unclassified(100);p__Firmicutes_unclassified(100);p__Firmicutes_unclassified(100);.81	1.65153	-2.81786	0.895053	-3.14826	0.00164245	0.00838149
k__Bacteria(100);p__Bacteroidetes(100);c__Bacteroidia(100);o__Bacteroidales(100);o__Bacteroidales_unclassified(100);o__Bacteroidales_unclassified(100);o__Bacteroidales_unclassified(100);.25	13.2219	-2.79149	0.666735	-4.1868	2.82912e-05	0.000267654
k__Bacteria(100);k__Bacteria_unclassified(100);k__Bacteria_unclassified(100);k__Bacteria_unclassified(100);k__Bacteria_unclassified(100);k__Bacteria_unclassified(100);k__Bacteria_unclassified(100);.42	12.8417	-2.77824	0.742121	-3.74365	0.000181367	0.00135143
k__Bacteria(100);k__Bacteria_unclassified(100);k__Bacteria_unclassified(100);k__Bacteria_unclassified(100);k__Bacteria_unclassified(100);k__Bacteria_unclassified(100);k__Bacteria_unclassified(100);.191	1.35793	-2.76934	0.766116	-3.61478	0.000300599	0.00204666
k__Bacteria(100);p__Proteobacteria(100);c__Deltaproteobacteria(100);o__Desulfarculales(100);f__Desulfarculaceae(100);f__Desulfarculaceae_unclassified(100);f__Desulfarculaceae_unclassified(100);.1	14.6684	-2.7509	0.802752	-3.42684	0.000610659	0.00364663
k__Bacteria(100);p__Firmicutes(100);p__Firmicutes_unclassified(100);p__Firmicutes_unclassified(100);p__Firmicutes_unclassified(100);p__Firmicutes_unclassified(100);p__Firmicutes_unclassified(100);.68	2.5247	-2.70309	1.05465	-2.56303	0.0103764	0.0360037
k__Bacteria(100);p__Bacteroidetes(100);c__Bacteroidia(100);o__Bacteroidales(100);f__Rikenellaceae(100);f__Rikenellaceae_unclassified(100);f__Rikenellaceae_unclassified(100);.54	6.05522	-2.68943	0.789605	-3.40604	0.000659128	0.00388102
k__Bacteria(100);p__Proteobacteria(100);p__Proteobacteria_unclassified(100);p__Proteobacteria_unclassified(100);p__Proteobacteria_unclassified(100);p__Proteobacteria_unclassified(100);p__Proteobacteria_unclassified(100);.10	16.306	-2.68928	0.898745	-2.99226	0.00276919	0.0130503
k__Bacteria(100);k__Bacteria_unclassified(100);k__Bacteria_unclassified(100);k__Bacteria_unclassified(100);k__Bacteria_unclassified(100);k__Bacteria_unclassified(100);k__Bacteria_unclassified(100);.211	1.30776	-2.67875	0.855602	-3.13084	0.00174308	0.00876883
k__Bacteria(100);p__Firmicutes(100);c__Clostridia(100);o__Clostridiales(100);o__Clostridiales_unclassified(100);o__Clostridiales_unclassified(100);o__Clostridiales_unclassified(100);.51	2.21982	-2.61876	0.67211	-3.89632	9.76644e-05	0.000795808
k__Bacteria(100);p__Bacteroidetes(100);p__Bacteroidetes_unclassified(100);p__Bacteroidetes_unclassified(100);p__Bacteroidetes_unclassified(100);p__Bacteroidetes_unclassified(100);p__Bacteroidetes_unclassified(100);.50	8.45628	-2.60865	0.887897	-2.93801	0.00330322	0.0148205
k__Bacteria(100);p__Proteobacteria(100);c__Deltaproteobacteria(100);o__Desulfovibrionales(100);f__Desulfovibrionaceae(100);g__Desulfovibrio(100);g__Desulfovibrio_unclassified(51);	6.11162	-2.60616	0.941425	-2.76832	0.00563461	0.022101
k__Bacteria(100);p__Bacteroidetes(100);c__Bacteroidia(100);o__Bacteroidales(100);f__Rikenellaceae(100);f__Rikenellaceae_unclassified(100);f__Rikenellaceae_unclassified(100);.30	10.8243	-2.57376	0.962208	-2.67485	0.00747622	0.0275007
k__Bacteria(100);p__Bacteroidetes(100);p__Bacteroidetes_unclassified(100);p__Bacteroidetes_unclassified(100);p__Bacteroidetes_unclassified(100);p__Bacteroidetes_unclassified(100);p__Bacteroidetes_unclassified(100);.46	11.007	-2.56372	0.876782	-2.92402	0.00345546	0.0153671
k__Bacteria(100);p__Planctomycetes(100);c__Planctomycetia(100);o__Pirellulales(100);f__Pirellulaceae(100);f__Pirellulaceae_unclassified(100);f__Pirellulaceae_unclassified(100);.6	19.0898	-2.54467	0.88003	-2.89157	0.00383318	0.0166083
k__Bacteria(100);p__Planctomycetes(100);c__Planctomycetia(100);o__Pirellulales(100);f__Pirellulaceae(100);f__Pirellulaceae_unclassified(100);f__Pirellulaceae_unclassified(100);.11	6.76419	-2.53499	0.917792	-2.76205	0.00574391	0.0223561
k__Bacteria(100);p__Bacteroidetes(100);c__Bacteroidia(100);o__Bacteroidales(100);f__Rikenellaceae(100);g__Alistipes(70);s__indistinctus(70);	19.7636	-2.53171	0.634896	-3.98759	6.67465e-05	0.000575433
k__Bacteria(100);p__Bacteroidetes(100);c__Bacteroidia(100);o__Bacteroidales(100);f__Porphyromonadaceae(100);g__Tannerella(100);g__Tannerella_unclassified(100);.2	49.2917	-2.52941	0.664466	-3.80667	0.000140849	0.00108141
k__Bacteria(100);p__Proteobacteria(100);c__Deltaproteobacteria(100);o__Desulfarculales(100);f__Desulfarculaceae(100);g__Desulfarculus(100);g__Desulfarculus_unclassified(100);	1.90618	-2.48619	0.863048	-2.8807	0.00396789	0.0170457
k__Bacteria(100);p__Bacteroidetes(100);c__Bacteroidia(100);o__Bacteroidales(100);o__Bacteroidales_unclassified(100);o__Bacteroidales_unclassified(100);o__Bacteroidales_unclassified(100);.63	1.59072	-2.42911	0.870574	-2.79024	0.00526688	0.0211849
k__Bacteria(100);p__Firmicutes(100);p__Firmicutes_unclassified(100);p__Firmicutes_unclassified(100);p__Firmicutes_unclassified(100);p__Firmicutes_unclassified(100);p__Firmicutes_unclassified(100);.2	77.6681	-2.41464	0.492033	-4.90747	9.22575e-07	1.46568e-05
k__Bacteria(100);p__Firmicutes(100);c__Clostridia(100);c__Clostridia_unclassified(100);c__Clostridia_unclassified(100);c__Clostridia_unclassified(100);c__Clostridia_unclassified(100);.2	3.73485	-2.40039	0.80894	-2.96733	0.00300401	0.0138469
k__Bacteria(100);p__Bacteroidetes(100);c__Bacteroidia(100);o__Bacteroidales(100);f__Rikenellaceae(100);f__Rikenellaceae_unclassified(55);f__Rikenellaceae_unclassified(55);	61.0358	-2.38182	0.659099	-3.61375	0.000301797	0.0020493
k__Bacteria(100);p__Firmicutes(100);c__Clostridia(100);o__Clostridiales(100);f__[Mogibacteriaceae](100);f__[Mogibacteriaceae]_unclassified(100);f__[Mogibacteriaceae]_unclassified(100);.1	24.2751	-2.37134	0.842383	-2.81504	0.00487707	0.0199022
k__Bacteria(100);p__Bacteroidetes(100);c__Bacteroidia(100);o__Bacteroidales(100);o__Bacteroidales_unclassified(100);o__Bacteroidales_unclassified(100);o__Bacteroidales_unclassified(100);.38	6.28411	-2.36419	0.581179	-4.06792	4.74353e-05	0.000429468
k__Bacteria(100);p__Firmicutes(100);c__Clostridia(100);o__Clostridiales(100);f__Ruminococcaceae(97);f__Ruminococcaceae_unclassified(97);f__Ruminococcaceae_unclassified(97);	1.53527	-2.3388	0.921825	-2.53714	0.0111763	0.0385675
k__Bacteria(100);k__Bacteria_unclassified(100);k__Bacteria_unclassified(100);k__Bacteria_unclassified(100);k__Bacteria_unclassified(100);k__Bacteria_unclassified(100);k__Bacteria_unclassified(100);.21	24.5514	-2.33317	0.90831	-2.56869	0.0102084	0.0356146
k__Bacteria(100);p__Bacteroidetes(100);c__Bacteroidia(100);o__Bacteroidales(100);f__Rikenellaceae(100);f__Rikenellaceae_unclassified(100);f__Rikenellaceae_unclassified(100);.25	14.1417	-2.30794	0.680143	-3.39331	0.000690534	0.00402838
k__Bacteria(100);p__Firmicutes(100);c__Clostridia(100);o__Clostridiales(100);o__Clostridiales_unclassified(100);o__Clostridiales_unclassified(100);o__Clostridiales_unclassified(100);.37	4.60933	-2.24534	0.718046	-3.12701	0.00176596	0.00881583
k__Bacteria(100);p__Planctomycetes(100);c__Planctomycetia(100);o__Pirellulales(100);f__Pirellulaceae(100);f__Pirellulaceae_unclassified(100);f__Pirellulaceae_unclassified(100);.2	37.5809	-2.23596	0.67682	-3.30363	0.000954426	0.00521836
k__Bacteria(100);p__Firmicutes(100);c__Clostridia(100);o__Clostridiales(100);f__Veillonellaceae(100);f__Veillonellaceae_unclassified(100);f__Veillonellaceae_unclassified(100);.2	15.4042	-2.21547	0.557719	-3.97238	7.11594e-05	0.000603183
k__Bacteria(100);p__Planctomycetes(100);c__vadinHA49(100);o__PeHg47(100);o__PeHg47_unclassified(100);o__PeHg47_unclassified(100);o__PeHg47_unclassified(100);	265.119	-2.20572	0.360944	-6.11098	9.90203e-10	3.08797e-08
k__Bacteria(100);p__Planctomycetes(100);c__vadinHA49(100);o__PeHg47(100);o__PeHg47_unclassified(100);o__PeHg47_unclassified(100);o__PeHg47_unclassified(100);.5	22.4823	-2.16581	0.645199	-3.3568	0.000788488	0.00447578
k__Bacteria(100);p__Firmicutes(100);c__Clostridia(100);o__Clostridiales(100);f__Ruminococcaceae(100);f__Ruminococcaceae_unclassified(100);f__Ruminococcaceae_unclassified(100);.112	2.79813	-2.15199	0.732158	-2.93925	0.00329006	0.0147877
k__Bacteria(100);p__Proteobacteria(100);c__Deltaproteobacteria(100);o__Desulfovibrionales(100);f__Desulfovibrionaceae(100);g__Desulfovibrio(100);g__Desulfovibrio_unclassified(63);	14.2358	-2.11587	0.576141	-3.67249	0.000240202	0.00171398
k__Bacteria(100);p__Proteobacteria(100);c__Deltaproteobacteria(100);o__Desulfovibrionales(100);f__Desulfovibrionaceae(100);g__Desulfovibrio(100);g__Desulfovibrio_unclassified(89);	11.8371	-2.10108	0.515715	-4.07412	4.61893e-05	0.000419691
k__Bacteria(100);p__Firmicutes(100);c__Clostridia(100);o__Clostridiales(100);f__Ruminococcaceae(100);f__Ruminococcaceae_unclassified(100);f__Ruminococcaceae_unclassified(100);.95	3.63035	-2.08515	0.600312	-3.47344	0.000513836	0.00315037
k__Bacteria(100);p__Firmicutes(100);c__Clostridia(100);o__Clostridiales(100);f__Christensenellaceae(100);g__Christensenella(100);g__Christensenella_unclassified(100);	2.16631	-2.06227	0.625931	-3.29472	0.000985185	0.00536331
k__Bacteria(100);p__Planctomycetes(100);c__vadinHA49(100);o__PeHg47(100);o__PeHg47_unclassified(100);o__PeHg47_unclassified(100);o__PeHg47_unclassified(100);.4	25.2429	-2.03683	0.700584	-2.90733	0.00364531	0.0159862
k__Bacteria(100);p__Proteobacteria(100);c__Deltaproteobacteria(100);o__Desulfarculales(98);f__Desulfarculaceae(98);g__Desulfarculus(98);g__Desulfarculus_unclassified(98);	14.5321	-2.03003	0.415584	-4.88477	1.03552e-06	1.61005e-05
k__Bacteria(100);p__Bacteroidetes(100);c__Bacteroidia(100);o__Bacteroidales(100);o__Bacteroidales_unclassified(100);o__Bacteroidales_unclassified(100);o__Bacteroidales_unclassified(100);.35	6.75674	-2.02835	0.702105	-2.88896	0.00386516	0.0167182
k__Bacteria(100);p__Firmicutes(100);c__Clostridia(100);o__Clostridiales(100);f__Eubacteriaceae(100);g__Anaerofustis(100);g__Anaerofustis_unclassified(100);	18.2127	-2.01627	0.713815	-2.82463	0.00473347	0.0195372
k__Bacteria(100);p__Proteobacteria(100);c__Deltaproteobacteria(100);o__Desulfovibrionales(99);o__Desulfovibrionales_unclassified(99);o__Desulfovibrionales_unclassified(99);o__Desulfovibrionales_unclassified(99);	2.3667	-1.94085	0.787122	-2.46576	0.0136723	0.0456828
k__Bacteria(100);p__Firmicutes(100);c__Clostridia(100);o__Clostridiales(100);f__Christensenellaceae(87);f__Christensenellaceae_unclassified(87);f__Christensenellaceae_unclassified(87);	3.2443	-1.87854	0.647434	-2.90151	0.00371369	0.0162017
k__Bacteria(100);p__Proteobacteria(100);p__Proteobacteria_unclassified(100);p__Proteobacteria_unclassified(100);p__Proteobacteria_unclassified(100);p__Proteobacteria_unclassified(100);p__Proteobacteria_unclassified(100);.3	38.7914	-1.86053	0.651237	-2.85692	0.0042777	0.01813
k__Bacteria(100);p__Bacteroidetes(100);c__Bacteroidia(100);o__Bacteroidales(100);f__Rikenellaceae(100);f__Rikenellaceae_unclassified(100);f__Rikenellaceae_unclassified(100);.6	97.8836	-1.84518	0.543903	-3.39248	0.00069263	0.0040313
k__Bacteria(100);k__Bacteria_unclassified(100);k__Bacteria_unclassified(100);k__Bacteria_unclassified(100);k__Bacteria_unclassified(100);k__Bacteria_unclassified(100);k__Bacteria_unclassified(100);.96	4.80769	-1.84101	0.517197	-3.5596	0.000371417	0.00237519
k__Bacteria(100);k__Bacteria_unclassified(100);k__Bacteria_unclassified(100);k__Bacteria_unclassified(100);k__Bacteria_unclassified(100);k__Bacteria_unclassified(100);k__Bacteria_unclassified(100);.6	56.7692	-1.83986	0.53906	-3.41308	0.000642321	0.00381765
k__Bacteria(100);p__Firmicutes(100);c__Clostridia(100);o__Clostridiales(100);o__Clostridiales_unclassified(100);o__Clostridiales_unclassified(100);o__Clostridiales_unclassified(100);.36	5.15588	-1.83744	0.514985	-3.56796	0.000359772	0.00231243
k__Bacteria(100);p__Bacteroidetes(100);c__Bacteroidia(100);o__Bacteroidales(100);o__Bacteroidales_unclassified(100);o__Bacteroidales_unclassified(100);o__Bacteroidales_unclassified(100);.45	3.89713	-1.82769	0.740424	-2.46843	0.0135706	0.0454029
k__Bacteria(100);p__Firmicutes(100);c__Clostridia(100);o__Clostridiales(100);f__Ruminococcaceae(100);f__Ruminococcaceae_unclassified(100);f__Ruminococcaceae_unclassified(100);.26	24.6047	-1.79609	0.470527	-3.81718	0.000134984	0.00104272
k__Bacteria(100);p__Firmicutes(100);c__Clostridia(100);o__Clostridiales(100);o__Clostridiales_unclassified(63);o__Clostridiales_unclassified(63);o__Clostridiales_unclassified(63);	6.36457	-1.78519	0.571474	-3.12383	0.00178511	0.00889386
k__Bacteria(100);p__Planctomycetes(100);c__vadinHA49(100);o__PeHg47(100);o__PeHg47_unclassified(100);o__PeHg47_unclassified(100);o__PeHg47_unclassified(100);.3	61.8881	-1.61713	0.334016	-4.84146	1.28886e-06	1.9495e-05
k__Bacteria(100);p__Proteobacteria(100);c__Deltaproteobacteria(100);o__Desulfovibrionales(100);o__Desulfovibrionales_unclassified(78);o__Desulfovibrionales_unclassified(78);o__Desulfovibrionales_unclassified(78);	2.29942	-1.56532	0.641582	-2.43979	0.0146959	0.0485253
k__Bacteria(100);p__Bacteroidetes(100);p__Bacteroidetes_unclassified(100);p__Bacteroidetes_unclassified(100);p__Bacteroidetes_unclassified(100);p__Bacteroidetes_unclassified(100);p__Bacteroidetes_unclassified(100);.32	16.8786	-1.55409	0.532907	-2.91625	0.00354261	0.0156994
k__Bacteria(100);p__Firmicutes(100);c__Clostridia(100);o__Clostridiales(89);o__Clostridiales_unclassified(89);o__Clostridiales_unclassified(89);o__Clostridiales_unclassified(89);	7.07598	-1.55342	0.632724	-2.45513	0.0140834	0.0468704
k__Bacteria(100);p__Planctomycetes(100);c__vadinHA49(100);o__PeHg47(100);o__PeHg47_unclassified(100);o__PeHg47_unclassified(100);o__PeHg47_unclassified(100);.2	70.5331	-1.54421	0.426752	-3.61852	0.000296298	0.00202283
k__Bacteria(100);p__Firmicutes(100);c__Clostridia(100);o__Clostridiales(100);f__Christensenellaceae(70);g__Christensenella(67);g__Christensenella_unclassified(67);	10.6476	-1.51752	0.484822	-3.13005	0.00174776	0.00876883
k__Bacteria(100);p__Firmicutes(100);p__Firmicutes_unclassified(100);p__Firmicutes_unclassified(100);p__Firmicutes_unclassified(100);p__Firmicutes_unclassified(100);p__Firmicutes_unclassified(100);.46	5.05923	-1.4895	0.594959	-2.50353	0.0122961	0.0418597
k__Bacteria(100);p__Proteobacteria(100);c__Deltaproteobacteria(100);c__Deltaproteobacteria_unclassified(100);c__Deltaproteobacteria_unclassified(100);c__Deltaproteobacteria_unclassified(100);c__Deltaproteobacteria_unclassified(100);.1	17.3012	-1.38712	0.502025	-2.76305	0.00572644	0.0223561
k__Bacteria(100);p__Bacteroidetes(100);c__Bacteroidia(100);o__Bacteroidales(100);f__Rikenellaceae(100);f__Rikenellaceae_unclassified(100);f__Rikenellaceae_unclassified(100);	192.459	-1.33902	0.390487	-3.42911	0.000605557	0.00363334
k__Bacteria(100);p__Planctomycetes(100);c__vadinHA49(100);o__PeHg47(100);o__PeHg47_unclassified(100);o__PeHg47_unclassified(100);o__PeHg47_unclassified(100);.1	82.4853	-1.293	0.500058	-2.5857	0.00971816	0.034285
k__Bacteria(100);p__Proteobacteria(100);c__Deltaproteobacteria(100);o__Desulfovibrionales(93);f__Desulfovibrionaceae(93);g__Desulfovibrio(93);g__Desulfovibrio_unclassified(93);	130.374	-1.09594	0.407159	-2.69168	0.00710942	0.0264483
k__Bacteria(100);p__Firmicutes(100);c__Clostridia(100);o__Clostridiales(100);f__Ruminococcaceae(100);f__Ruminococcaceae_unclassified(100);f__Ruminococcaceae_unclassified(100);.2	100.2	-0.826828	0.323479	-2.55605	0.0105868	0.0366333
k__Bacteria(100);p__Firmicutes(100);c__Clostridia(100);o__Clostridiales(100);o__Clostridiales_unclassified(75);o__Clostridiales_unclassified(75);o__Clostridiales_unclassified(75);	61.3536	1.23534	0.369808	3.3405	0.000836287	0.00466327
k__Bacteria(100);p__Firmicutes(100);c__Clostridia(100);o__Clostridiales(100);f__Ruminococcaceae(100);f__Ruminococcaceae_unclassified(100);f__Ruminococcaceae_unclassified(100);.27	20.7534	1.25296	0.509652	2.45847	0.0139531	0.046498
k__Bacteria(100);p__Firmicutes(100);c__Clostridia(100);o__Clostridiales(100);o__Clostridiales_unclassified(100);o__Clostridiales_unclassified(100);o__Clostridiales_unclassified(100);.1	152.224	1.25941	0.499974	2.51895	0.0117707	0.0402882
k__Bacteria(100);p__Firmicutes(100);c__Clostridia(100);o__Clostridiales(100);o__Clostridiales_unclassified(100);o__Clostridiales_unclassified(100);o__Clostridiales_unclassified(100);.15	14.3424	1.25988	0.427165	2.94939	0.00318404	0.0144138
k__Bacteria(100);p__Firmicutes(100);c__Clostridia(100);o__Clostridiales(100);f__Ruminococcaceae(100);f__Ruminococcaceae_unclassified(100);f__Ruminococcaceae_unclassified(100);.37	16.336	1.28396	0.415779	3.08808	0.00201454	0.00986188
k__Bacteria(100);p__Bacteroidetes(100);p__Bacteroidetes_unclassified(100);p__Bacteroidetes_unclassified(100);p__Bacteroidetes_unclassified(100);p__Bacteroidetes_unclassified(100);p__Bacteroidetes_unclassified(100);.2	372.579	1.32575	0.495477	2.6757	0.00745741	0.0274999
k__Bacteria(100);p__Firmicutes(100);c__Clostridia(100);o__Clostridiales(100);f__Dehalobacteriaceae(100);g__Dehalobacterium(100);g__Dehalobacterium_unclassified(100);.13	2.80677	1.39816	0.519842	2.68959	0.0071539	0.0265746
k__Bacteria(100);p__Firmicutes(100);c__Clostridia(100);o__Clostridiales(100);f__Ruminococcaceae(100);f__Ruminococcaceae_unclassified(100);f__Ruminococcaceae_unclassified(100);.4	100.309	1.44436	0.397125	3.63704	0.000275794	0.00191389
k__Bacteria(100);p__Firmicutes(100);c__Clostridia(100);o__Clostridiales(100);f__Veillonellaceae(100);f__Veillonellaceae_unclassified(100);f__Veillonellaceae_unclassified(100);.1	56.1234	1.47167	0.527911	2.78772	0.00530807	0.0212828
k__Bacteria(100);p__Bacteroidetes(100);c__Bacteroidia(100);o__Bacteroidales(100);f__Porphyromonadaceae(99);f__Porphyromonadaceae_unclassified(70);f__Porphyromonadaceae_unclassified(70);	58.4033	1.52369	0.602524	2.52885	0.0114437	0.039329
k__Bacteria(100);p__Bacteroidetes(100);c__Bacteroidia(100);o__Bacteroidales(100);f__Porphyromonadaceae(100);g__Paludibacter(100);g__Paludibacter_unclassified(100);.1	107.075	1.53517	0.452983	3.38903	0.000701402	0.00406363
k__Bacteria(100);p__Bacteroidetes(100);c__Bacteroidia(100);o__Bacteroidales(100);f__Porphyromonadaceae(100);f__Porphyromonadaceae_unclassified(100);f__Porphyromonadaceae_unclassified(100);.2	154.404	1.5385	0.566715	2.71478	0.00663206	0.0251163
k__Bacteria(100);p__Firmicutes(100);c__Clostridia(100);o__Clostridiales(100);f__Ruminococcaceae(100);f__Ruminococcaceae_unclassified(100);f__Ruminococcaceae_unclassified(100);.23	25.4384	1.5645	0.571145	2.73923	0.00615836	0.0235697
k__Bacteria(100);p__Deferribacteres(100);c__Deferribacteres(100);o__Deferribacterales(100);f__Deferribacteraceae(100);g__Mucispirillum(91);g__Mucispirillum_unclassified(91);	21.4246	1.62901	0.56242	2.89642	0.00377444	0.0163819
k__Bacteria(100);p__Proteobacteria(100);p__Proteobacteria_unclassified(100);p__Proteobacteria_unclassified(100);p__Proteobacteria_unclassified(100);p__Proteobacteria_unclassified(100);p__Proteobacteria_unclassified(100);	102.492	1.63536	0.53694	3.0457	0.00232142	0.0111907
k__Bacteria(100);p__Firmicutes(100);c__Clostridia(100);o__Clostridiales(100);f__Christensenellaceae(100);f__Christensenellaceae_unclassified(100);f__Christensenellaceae_unclassified(100);.13	3.32646	1.65117	0.631332	2.61537	0.00891306	0.031845
k__Bacteria(100);p__Firmicutes(100);p__Firmicutes_unclassified(100);p__Firmicutes_unclassified(100);p__Firmicutes_unclassified(100);p__Firmicutes_unclassified(100);p__Firmicutes_unclassified(100);.24	10.0799	1.65602	0.58129	2.84886	0.00438755	0.0185024
k__Bacteria(100);p__Firmicutes(100);c__Clostridia(100);o__Clostridiales(100);f__Christensenellaceae(100);f__Christensenellaceae_unclassified(100);f__Christensenellaceae_unclassified(100);.6	13.8169	1.67413	0.546005	3.06614	0.0021684	0.0105334
k__Bacteria(100);p__Proteobacteria(100);c__Deltaproteobacteria(100);o__Desulfovibrionales(100);f__Desulfovibrionaceae(100);g__Desulfovibrio(100);g__Desulfovibrio_unclassified(100);.6	35.9105	1.70893	0.622293	2.74618	0.00602928	0.0231813
k__Bacteria(100);p__Proteobacteria(100);p__Proteobacteria_unclassified(100);p__Proteobacteria_unclassified(100);p__Proteobacteria_unclassified(100);p__Proteobacteria_unclassified(100);p__Proteobacteria_unclassified(100);.7	22.1136	1.72165	0.688564	2.50035	0.012407	0.0420672
k__Bacteria(100);p__Bacteroidetes(100);c__Bacteroidia(100);o__Bacteroidales(100);f__[Odoribacteraceae](100);f__[Odoribacteraceae]_unclassified(100);f__[Odoribacteraceae]_unclassified(100);	126.137	1.72968	0.620072	2.78948	0.00527933	0.0212012
k__Bacteria(100);p__Firmicutes(100);c__Clostridia(100);o__Clostridiales(100);f__Ruminococcaceae(100);f__Ruminococcaceae_unclassified(100);f__Ruminococcaceae_unclassified(100);.52	12.1949	1.75314	0.592329	2.95974	0.00307899	0.0140643
k__Bacteria(100);p__Firmicutes(100);c__Clostridia(100);o__Clostridiales(100);f__Ruminococcaceae(100);f__Ruminococcaceae_unclassified(100);f__Ruminococcaceae_unclassified(100);.19	26.8922	1.7535	0.60333	2.90637	0.00365645	0.0160073
k__Bacteria(100);p__Spirochaetes(100);c__Spirochaetes(100);o__Spirochaetales(100);f__Spirochaetaceae(100);g__Treponema(100);g__Treponema_unclassified(100);	69.8678	1.76135	0.568722	3.09703	0.00195469	0.00960611
k__Bacteria(100);k__Bacteria_unclassified(100);k__Bacteria_unclassified(100);k__Bacteria_unclassified(100);k__Bacteria_unclassified(100);k__Bacteria_unclassified(100);k__Bacteria_unclassified(100);.93	4.49032	1.77194	0.608358	2.91265	0.00358376	0.015771
k__Bacteria(100);p__Bacteroidetes(100);c__Bacteroidia(100);o__Bacteroidales(100);f__Porphyromonadaceae(100);g__Parabacteroides(52);g__Parabacteroides_unclassified(52);	433.691	1.82321	0.506266	3.60129	0.000316647	0.00212162
k__Bacteria(100);p__Bacteroidetes(100);p__Bacteroidetes_unclassified(100);p__Bacteroidetes_unclassified(100);p__Bacteroidetes_unclassified(100);p__Bacteroidetes_unclassified(100);p__Bacteroidetes_unclassified(100);.18	30.9791	1.83848	0.660619	2.78297	0.00538636	0.0214605
k__Bacteria(100);p__Firmicutes(100);c__Clostridia(100);o__Clostridiales(100);o__Clostridiales_unclassified(100);o__Clostridiales_unclassified(100);o__Clostridiales_unclassified(100);.20	12.6235	1.8623	0.708036	2.63024	0.00853256	0.030659
k__Bacteria(100);p__Firmicutes(100);c__Clostridia(100);o__Clostridiales(100);f__Ruminococcaceae(100);f__Ruminococcaceae_unclassified(100);f__Ruminococcaceae_unclassified(100);.146	1.44666	1.86807	0.743853	2.51134	0.0120273	0.0410555
k__Bacteria(100);k__Bacteria_unclassified(100);k__Bacteria_unclassified(100);k__Bacteria_unclassified(100);k__Bacteria_unclassified(100);k__Bacteria_unclassified(100);k__Bacteria_unclassified(100);.8	41.5997	1.88805	0.599981	3.14685	0.00165041	0.0084051
k__Bacteria(100);p__Firmicutes(100);c__Clostridia(100);o__Clostridiales(100);f__Lachnospiraceae(100);f__Lachnospiraceae_unclassified(100);f__Lachnospiraceae_unclassified(100);.6	78.3972	1.93312	0.717033	2.696	0.00701777	0.0261458
k__Bacteria(100);p__Planctomycetes(100);c__vadinHA49(100);o__PeHg47(100);o__PeHg47_unclassified(100);o__PeHg47_unclassified(100);o__PeHg47_unclassified(100);.6	10.6833	1.95441	0.762226	2.56409	0.0103448	0.0359435
k__Bacteria(100);p__Proteobacteria(100);c__Deltaproteobacteria(100);o__Desulfovibrionales(98);o__Desulfovibrionales_unclassified(90);o__Desulfovibrionales_unclassified(90);o__Desulfovibrionales_unclassified(90);	32.5083	1.98618	0.45576	4.35794	1.31291e-05	0.000143567
k__Bacteria(100);p__Firmicutes(100);c__Clostridia(100);o__Clostridiales(100);f__Lachnospiraceae(100);f__Lachnospiraceae_unclassified(100);f__Lachnospiraceae_unclassified(100);.25	14.0392	1.98743	0.815664	2.43658	0.0148269	0.0488303
k__Bacteria(100);p__Firmicutes(100);c__Clostridia(100);o__Clostridiales(100);f__Ruminococcaceae(100);f__Ruminococcaceae_unclassified(100);f__Ruminococcaceae_unclassified(100);.38	15.2209	2.01356	0.53226	3.78305	0.000154921	0.00117165
k__Bacteria(100);p__Firmicutes(100);c__Erysipelotrichi(100);o__Erysipelotrichales(100);f__Erysipelotrichaceae(100);f__Erysipelotrichaceae_unclassified(100);f__Erysipelotrichaceae_unclassified(100);	112.214	2.0284	0.526814	3.85032	0.000117963	0.000934089
k__Bacteria(100);p__Bacteroidetes(100);c__Bacteroidia(100);o__Bacteroidales(100);f__[Odoribacteraceae](100);g__Odoribacter(100);g__Odoribacter_unclassified(100);.1	265.388	2.03047	0.703915	2.88453	0.00391994	0.0169261
k__Bacteria(100);p__Firmicutes(100);c__Clostridia(100);o__Clostridiales(100);f__Ruminococcaceae(100);f__Ruminococcaceae_unclassified(100);f__Ruminococcaceae_unclassified(100);.6	70.7884	2.04295	0.534207	3.82427	0.000131158	0.0010194
k__Bacteria(100);p__Proteobacteria(100);c__Deltaproteobacteria(100);o__Desulfovibrionales(100);f__Desulfovibrionaceae(99);f__Desulfovibrionaceae_unclassified(98);f__Desulfovibrionaceae_unclassified(98);	11.1726	2.04433	0.789529	2.58931	0.00961694	0.0339842
k__Bacteria(100);p__Tenericutes(100);c__RF3(100);o__ML615J-28(100);o__ML615J-28_unclassified(100);o__ML615J-28_unclassified(100);o__ML615J-28_unclassified(100);	17.8357	2.05414	0.77383	2.65451	0.00794238	0.028992
k__Bacteria(100);p__Firmicutes(100);c__Clostridia(100);o__Clostridiales(100);f__Ruminococcaceae(100);f__Ruminococcaceae_unclassified(100);f__Ruminococcaceae_unclassified(100);.69	4.95793	2.06851	0.766313	2.6993	0.00694852	0.0259645
k__Bacteria(100);p__Actinobacteria(100);c__Coriobacteriia(100);o__Coriobacteriales(100);f__Coriobacteriaceae(100);g__Enterococcus(100);s__casseliflavus(100);.2	11.2276	2.09017	0.63685	3.28205	0.00103057	0.00555058
k__Bacteria(100);p__Actinobacteria(100);c__Coriobacteriia(100);o__Coriobacteriales(100);f__Coriobacteriaceae(100);g__Enterococcus(100);s__casseliflavus(100);.3	7.68318	2.09587	0.649781	3.22551	0.00125749	0.00661757
k__Bacteria(100);p__Bacteroidetes(100);c__Bacteroidia(100);o__Bacteroidales(100);f__Porphyromonadaceae(100);g__Dysgonomonas(100);g__Dysgonomonas_unclassified(100);.3	76.4652	2.0976	0.738098	2.8419	0.00448461	0.0188488
k__Bacteria(100);p__Firmicutes(100);c__Clostridia(100);o__Clostridiales(100);o__Clostridiales_unclassified(100);o__Clostridiales_unclassified(100);o__Clostridiales_unclassified(100);.11	19.4957	2.10028	0.735935	2.8539	0.00431866	0.0182729
k__Bacteria(100);p__Bacteroidetes(100);c__Bacteroidia(100);o__Bacteroidales(100);o__Bacteroidales_unclassified(100);o__Bacteroidales_unclassified(100);o__Bacteroidales_unclassified(100);.6	199.176	2.11627	0.820442	2.57942	0.00989656	0.0347204
k__Bacteria(100);p__Proteobacteria(100);c__Deltaproteobacteria(100);o__Desulfobacterales(100);f__Desulfobacteraceae(100);g__Desulfosarcina(93);g__Desulfosarcina_unclassified(93);	344.885	2.14583	0.864072	2.48339	0.013014	0.0437728
k__Bacteria(100);p__Bacteroidetes(100);c__Bacteroidia(100);o__Bacteroidales(100);o__Bacteroidales_unclassified(100);o__Bacteroidales_unclassified(100);o__Bacteroidales_unclassified(100);.7	189.119	2.16155	0.677326	3.1913	0.00141636	0.00733143
k__Bacteria(100);k__Bacteria_unclassified(100);k__Bacteria_unclassified(100);k__Bacteria_unclassified(100);k__Bacteria_unclassified(100);k__Bacteria_unclassified(100);k__Bacteria_unclassified(100);.49	10.5265	2.18821	0.792118	2.76247	0.00573651	0.0223561
k__Bacteria(100);p__Bacteroidetes(100);c__Bacteroidia(100);o__Bacteroidales(100);o__Bacteroidales_unclassified(100);o__Bacteroidales_unclassified(100);o__Bacteroidales_unclassified(100);.3	275.122	2.20648	0.696034	3.17007	0.00152401	0.00784042
k__Bacteria(100);p__Bacteroidetes(100);c__Bacteroidia(100);o__Bacteroidales(100);f__Rikenellaceae(100);f__Rikenellaceae_unclassified(100);f__Rikenellaceae_unclassified(100);.7	68.1955	2.22115	0.532496	4.17121	3.02992e-05	0.000285581
k__Bacteria(100);p__Firmicutes(100);c__Clostridia(100);o__Clostridiales(100);f__Ruminococcaceae(100);f__Ruminococcaceae_unclassified(100);f__Ruminococcaceae_unclassified(100);.43	14.1852	2.22703	0.822165	2.70874	0.00675397	0.0254255
k__Bacteria(100);p__Firmicutes(100);c__Clostridia(100);o__Clostridiales(100);f__Lachnospiraceae(100);g__Clostridium(100);g__Clostridium_unclassified(100);.4	29.6702	2.23282	0.915939	2.43774	0.0147795	0.0487375
k__Bacteria(100);p__Bacteroidetes(100);c__Bacteroidia(100);o__Bacteroidales(100);f__Rikenellaceae(100);f__Rikenellaceae_unclassified(100);f__Rikenellaceae_unclassified(100);.12	32.5503	2.24053	0.62574	3.5806	0.000342804	0.00222814
k__Bacteria(100);p__Proteobacteria(100);c__Deltaproteobacteria(100);o__Desulfovibrionales(100);f__Desulfovibrionaceae(100);g__Desulfovibrio(100);g__Desulfovibrio_unclassified(100);.7	35.6949	2.24205	0.475429	4.71585	2.40709e-06	3.35929e-05
k__Bacteria(100);p__Bacteroidetes(100);c__Bacteroidia(100);o__Bacteroidales(100);f__Porphyromonadaceae(100);g__Dysgonomonas(100);g__Dysgonomonas_unclassified(100);.27	11.5313	2.2441	0.922795	2.43185	0.0150219	0.0493438
k__Bacteria(100);p__Bacteroidetes(100);p__Bacteroidetes_unclassified(100);p__Bacteroidetes_unclassified(100);p__Bacteroidetes_unclassified(100);p__Bacteroidetes_unclassified(100);p__Bacteroidetes_unclassified(100);.11	144.784	2.24974	0.839911	2.67855	0.00739416	0.0273065
k__Bacteria(100);k__Bacteria_unclassified(100);k__Bacteria_unclassified(100);k__Bacteria_unclassified(100);k__Bacteria_unclassified(100);k__Bacteria_unclassified(100);k__Bacteria_unclassified(100);.3	109.979	2.25827	0.552235	4.08933	4.32613e-05	0.000397375
k__Bacteria(100);p__Bacteroidetes(100);c__Bacteroidia(100);o__Bacteroidales(100);f__Porphyromonadaceae(100);f__Porphyromonadaceae_unclassified(100);f__Porphyromonadaceae_unclassified(100);.3	50.8988	2.28236	0.870314	2.62245	0.00872996	0.0313237
k__Archaea(100);p__Euryarchaeota(100);c__Thermoplasmata(100);o__E2(100);f__[Methanomassiliicoccaceae](100);g__vadinCA11(100);g__vadinCA11_unclassified(100);.1	157.542	2.3135	0.616819	3.75069	0.000176347	0.0013179
k__Bacteria(100);p__Firmicutes(100);c__Clostridia(100);o__Clostridiales(100);f__Ruminococcaceae(100);f__Ruminococcaceae_unclassified(100);f__Ruminococcaceae_unclassified(100);.55	7.58584	2.3205	0.50716	4.57548	4.75137e-06	5.9123e-05
k__Bacteria(100);p__Bacteroidetes(100);c__Bacteroidia(100);o__Bacteroidales(100);f__Rikenellaceae(100);f__Rikenellaceae_unclassified(100);f__Rikenellaceae_unclassified(100);.2	178.548	2.3858	0.647137	3.6867	0.000227184	0.00164904
k__Bacteria(100);p__Firmicutes(100);c__Clostridia(100);o__Clostridiales(100);f__Lachnospiraceae(100);f__Lachnospiraceae_unclassified(100);f__Lachnospiraceae_unclassified(100);.37	6.2678	2.38884	0.905298	2.63873	0.00832161	0.0299492
k__Bacteria(100);p__Firmicutes(100);c__Clostridia(100);o__Clostridiales(100);f__Ruminococcaceae(100);g__Subdoligranulum(62);s__variabile(62);	103.532	2.45498	0.881419	2.78525	0.00534858	0.0213595
k__Bacteria(100);p__Synergistetes(100);c__Synergistia(100);o__Synergistales(100);f__Synergistaceae(100);f__Synergistaceae_unclassified(100);f__Synergistaceae_unclassified(100);	216.234	2.46594	0.684237	3.60392	0.000313452	0.00210579
k__Bacteria(100);p__Bacteroidetes(100);c__Bacteroidia(100);o__Bacteroidales(100);f__Porphyromonadaceae(100);f__Porphyromonadaceae_unclassified(100);f__Porphyromonadaceae_unclassified(100);.1	187.959	2.4876	0.940111	2.64607	0.00814337	0.0295124
k__Bacteria(100);p__Firmicutes(100);p__Firmicutes_unclassified(100);p__Firmicutes_unclassified(100);p__Firmicutes_unclassified(100);p__Firmicutes_unclassified(100);p__Firmicutes_unclassified(100);.8	36.8843	2.50453	0.902938	2.77375	0.00554136	0.0218807
k__Bacteria(100);k__Bacteria_unclassified(100);k__Bacteria_unclassified(100);k__Bacteria_unclassified(100);k__Bacteria_unclassified(100);k__Bacteria_unclassified(100);k__Bacteria_unclassified(100);.65	7.71339	2.51203	0.61808	4.06425	4.81866e-05	0.000434712
k__Bacteria(100);p__Firmicutes(100);c__Clostridia(100);o__Clostridiales(100);f__Dehalobacteriaceae(100);g__Dehalobacterium(100);g__Dehalobacterium_unclassified(100);.8	4.29879	2.53523	0.680097	3.72775	0.000193197	0.00143534
k__Bacteria(100);p__Bacteroidetes(100);c__Bacteroidia(100);o__Bacteroidales(100);f__Porphyromonadaceae(100);g__Candidatus_Azobacteroides(100);g__Candidatus_Azobacteroides_unclassified(100);.10	52.1987	2.54308	1.00698	2.52546	0.0115548	0.0396569
k__Bacteria(100);p__Tenericutes(100);c__Mollicutes(100);o__RF39(100);o__RF39_unclassified(100);o__RF39_unclassified(100);o__RF39_unclassified(100);.14	4.21885	2.57309	1.04961	2.45148	0.0142272	0.0472245
k__Bacteria(100);p__Firmicutes(100);c__Clostridia(100);o__Clostridiales(100);f__Ruminococcaceae(100);f__Ruminococcaceae_unclassified(100);f__Ruminococcaceae_unclassified(100);.18	28.4815	2.5815	0.481703	5.3591	8.36384e-08	1.71807e-06
k__Bacteria(100);p__Firmicutes(100);p__Firmicutes_unclassified(100);p__Firmicutes_unclassified(100);p__Firmicutes_unclassified(100);p__Firmicutes_unclassified(100);p__Firmicutes_unclassified(100);.17	16.2981	2.59431	0.698834	3.71234	0.000205353	0.00151673
k__Bacteria(100);p__Lentisphaerae(100);c__[Lentisphaeria](100);o__Victivallales(100);f__Victivallaceae(100);f__Victivallaceae_unclassified(100);f__Victivallaceae_unclassified(100);	50.9473	2.6064	0.664796	3.9206	8.83289e-05	0.000729036
k__Bacteria(100);p__Firmicutes(100);c__Clostridia(100);o__Clostridiales(100);f__Ruminococcaceae(100);g__Clostridium(93);s__methylpentosum(93);	2.15956	2.60793	0.87787	2.97075	0.00297078	0.0137188
k__Bacteria(100);p__Bacteroidetes(100);c__Bacteroidia(100);o__Bacteroidales(100);o__Bacteroidales_unclassified(78);o__Bacteroidales_unclassified(78);o__Bacteroidales_unclassified(78);	97.8413	2.62513	0.987875	2.65735	0.0078758	0.0288741
k__Bacteria(100);p__Firmicutes(100);c__Clostridia(100);o__Clostridiales(100);o__Clostridiales_unclassified(100);o__Clostridiales_unclassified(100);o__Clostridiales_unclassified(100);.59	2.15737	2.65926	0.75344	3.52949	0.000416354	0.00260896
k__Bacteria(100);p__Proteobacteria(100);c__Deltaproteobacteria(100);o__Desulfovibrionales(100);f__Desulfovibrionaceae(100);g__Desulfovibrio(100);g__Desulfovibrio_unclassified(100);.21	3.37841	2.66825	0.702645	3.79743	0.000146202	0.00111573
k__Bacteria(100);p__Firmicutes(100);c__Clostridia(100);o__Clostridiales(100);f__Ruminococcaceae(100);g__Ruminococcus(100);g__Ruminococcus_unclassified(100);.6	14.3633	2.67693	0.974951	2.74571	0.00603808	0.0231813
k__Bacteria(100);p__Bacteroidetes(100);c__Flavobacteriia(100);o__Flavobacteriales(100);f__Blattabacteriaceae(100);g__Blattabacterium(100);g__Blattabacterium_unclassified(100);	2410.94	2.68096	0.512491	5.23122	1.68391e-07	3.2224e-06
k__Bacteria(100);p__Proteobacteria(100);c__Deltaproteobacteria(100);o__Desulfobacterales(99);f__Desulfobacteraceae(99);f__Desulfobacteraceae_unclassified(99);f__Desulfobacteraceae_unclassified(99);	0.736445	2.6832	0.989602	2.71139	0.00670019	0.0252607
k__Bacteria(100);p__Firmicutes(100);c__Clostridia(100);o__Clostridiales(100);f__Ruminococcaceae(99);f__Ruminococcaceae_unclassified(99);f__Ruminococcaceae_unclassified(99);.1	15.7902	2.72157	0.537093	5.06722	4.03658e-07	7.08083e-06
k__Bacteria(100);p__Firmicutes(100);c__Clostridia(100);o__Clostridiales(100);f__Ruminococcaceae(100);f__Ruminococcaceae_unclassified(100);f__Ruminococcaceae_unclassified(100);.41	11.6641	2.73092	0.704783	3.87483	0.000106697	0.000855612
k__Bacteria(100);p__Proteobacteria(100);c__Deltaproteobacteria(100);c__Deltaproteobacteria_unclassified(95);c__Deltaproteobacteria_unclassified(95);c__Deltaproteobacteria_unclassified(95);c__Deltaproteobacteria_unclassified(95);	72.8821	2.73116	0.966152	2.82685	0.00470086	0.0194551
k__Bacteria(100);p__Bacteroidetes(100);c__Bacteroidia(100);o__Bacteroidales(100);f__Porphyromonadaceae(100);g__Parabacteroides(100);g__Parabacteroides_unclassified(100);.1	76.1228	2.73495	0.948453	2.88359	0.00393172	0.016948
k__Bacteria(100);p__Firmicutes(100);c__Clostridia(100);o__Clostridiales(100);f__Dehalobacteriaceae(100);g__Dehalobacterium(100);g__Dehalobacterium_unclassified(100);.1	9.02132	2.73625	0.632141	4.32855	1.50097e-05	0.0001597
k__Bacteria(100);p__Tenericutes(100);c__Mollicutes(100);o__Acholeplasmatales(100);f__Acholeplasmataceae(100);g__Acholeplasma(93);g__Acholeplasma_unclassified(93);	264.914	2.77099	0.499932	5.54274	2.97767e-08	6.77621e-07
k__Bacteria(100);p__Firmicutes(100);c__Clostridia(100);o__Clostridiales(100);f__Lachnospiraceae(100);f__Lachnospiraceae_unclassified(100);f__Lachnospiraceae_unclassified(100);.14	43.0107	2.78024	1.02347	2.71648	0.00659807	0.0250271
k__Bacteria(100);p__Bacteroidetes(100);c__Bacteroidia(100);o__Bacteroidales(100);o__Bacteroidales_unclassified(97);o__Bacteroidales_unclassified(97);o__Bacteroidales_unclassified(97);	681.107	2.79358	0.657672	4.24767	2.16002e-05	0.000211595
k__Bacteria(100);p__Actinobacteria(100);c__Coriobacteriia(100);o__Coriobacteriales(100);f__Coriobacteriaceae(100);g__Enterococcus(100);s__casseliflavus(100);	20.7429	2.79461	0.612712	4.56104	5.09001e-06	6.27188e-05
k__Bacteria(100);p__Bacteroidetes(100);c__Bacteroidia(100);o__Bacteroidales(100);f__Porphyromonadaceae(100);g__Candidatus_Azobacteroides(100);g__Candidatus_Azobacteroides_unclassified(100);.11	49.8541	2.79723	0.91648	3.05215	0.0022721	0.011016
k__Bacteria(100);p__Firmicutes(100);c__Clostridia(100);o__Clostridiales(100);f__Ruminococcaceae(100);f__Ruminococcaceae_unclassified(100);f__Ruminococcaceae_unclassified(100);.47	13.9374	2.83505	0.806158	3.51675	0.000436869	0.00272477
k__Bacteria(100);p__Firmicutes(100);c__Clostridia(100);o__Clostridiales(100);o__Clostridiales_unclassified(100);o__Clostridiales_unclassified(100);o__Clostridiales_unclassified(100);.5	37.7176	2.83687	0.66471	4.26782	1.97388e-05	0.000197076
k__Bacteria(100);p__Firmicutes(100);c__Clostridia(100);o__Clostridiales(100);f__Lachnospiraceae(100);g__Clostridium(100);g__Clostridium_unclassified(100);.3	29.9581	2.83704	1.13828	2.49239	0.0126886	0.0429068
k__Bacteria(100);p__Firmicutes(100);c__Clostridia(100);o__Clostridiales(100);f__Dehalobacteriaceae(100);g__Dehalobacterium(100);g__Dehalobacterium_unclassified(100);.18	1.33525	2.86193	1.15021	2.48817	0.0128404	0.0433041
k__Bacteria(100);p__Firmicutes(100);c__Clostridia(100);o__Clostridiales(100);f__Ruminococcaceae(100);f__Ruminococcaceae_unclassified(100);f__Ruminococcaceae_unclassified(100);.40	13.9666	2.86241	0.570689	5.0157	5.28394e-07	8.89815e-06
k__Bacteria(100);p__Firmicutes(100);c__Clostridia(100);o__Clostridiales(100);f__Ruminococcaceae(100);f__Ruminococcaceae_unclassified(100);f__Ruminococcaceae_unclassified(100);.12	36.9866	2.88485	0.75123	3.84016	0.000122952	0.000964528
k__Bacteria(100);p__Bacteroidetes(100);c__Bacteroidia(100);o__Bacteroidales(100);f__Porphyromonadaceae(100);g__Candidatus_Azobacteroides(100);g__Candidatus_Azobacteroides_unclassified(100);.9	50.462	2.88705	0.667333	4.32625	1.51672e-05	0.0001597
k__Bacteria(100);p__Elusimicrobia(100);c__Elusimicrobia(100);o__Elusimicrobiales(100);f__Elusimicrobiaceae(100);g__Elusimicrobium(100);s__minutum(84);	14.5784	2.88823	1.16481	2.47958	0.0131536	0.0441835
k__Bacteria(100);p__Firmicutes(100);c__Clostridia(100);o__Clostridiales(100);f__Ruminococcaceae(100);f__Ruminococcaceae_unclassified(100);f__Ruminococcaceae_unclassified(100);.25	21.3895	2.89095	0.627273	4.60876	4.05076e-06	5.22052e-05
k__Bacteria(100);p__Firmicutes(100);c__Clostridia(100);o__Clostridiales(100);f__Lachnospiraceae(100);f__Lachnospiraceae_unclassified(100);f__Lachnospiraceae_unclassified(100);.7	42.7204	2.89196	1.11692	2.58922	0.00961945	0.0339842
k__Bacteria(100);p__Verrucomicrobia(100);c__Verruco-5(100);o__WCHB1-41(100);f__RFP12(100);f__RFP12_unclassified(100);f__RFP12_unclassified(100);	54.2304	2.89458	1.08064	2.67858	0.00739344	0.0273065
k__Bacteria(100);p__Firmicutes(100);c__Clostridia(100);o__Clostridiales(100);f__Dehalobacteriaceae(100);g__Dehalobacterium(100);g__Dehalobacterium_unclassified(100);.6	5.48377	2.8959	0.681894	4.24684	2.16804e-05	0.000211595
k__Bacteria(100);p__Firmicutes(100);c__Clostridia(100);o__Clostridiales(100);f__Ruminococcaceae(100);f__Ruminococcaceae_unclassified(100);f__Ruminococcaceae_unclassified(100);.21	23.8377	2.92658	1.03765	2.8204	0.00479641	0.0196048
k__Bacteria(100);p__Firmicutes(100);c__Clostridia(100);o__Clostridiales(100);f__Ruminococcaceae(100);f__Ruminococcaceae_unclassified(100);f__Ruminococcaceae_unclassified(100);.13	33.3394	2.97089	0.858983	3.45861	0.000542967	0.00328118
k__Bacteria(100);p__Firmicutes(100);c__Erysipelotrichi(100);o__Erysipelotrichales(100);f__Erysipelotrichaceae(100);f__Erysipelotrichaceae_unclassified(100);f__Erysipelotrichaceae_unclassified(100);.6	9.43084	2.97563	1.0716	2.77682	0.00548936	0.0217679
k__Bacteria(100);p__Firmicutes(100);c__Clostridia(100);o__Clostridiales(100);f__Ruminococcaceae(100);f__Ruminococcaceae_unclassified(100);f__Ruminococcaceae_unclassified(100);.107	1.97691	2.98086	1.12501	2.64963	0.00805797	0.0293715
k__Bacteria(100);k__Bacteria_unclassified(100);k__Bacteria_unclassified(100);k__Bacteria_unclassified(100);k__Bacteria_unclassified(100);k__Bacteria_unclassified(100);k__Bacteria_unclassified(100);.32	15.0312	2.98999	0.489066	6.11367	9.73669e-10	3.07436e-08
k__Bacteria(100);k__Bacteria_unclassified(100);k__Bacteria_unclassified(100);k__Bacteria_unclassified(100);k__Bacteria_unclassified(100);k__Bacteria_unclassified(100);k__Bacteria_unclassified(100);.38	14.384	3.00163	0.641933	4.67592	2.92632e-06	4.01733e-05
k__Bacteria(100);p__Firmicutes(100);c__Clostridia(100);o__Clostridiales(99);f__Ruminococcaceae(99);f__Ruminococcaceae_unclassified(99);f__Ruminococcaceae_unclassified(99);	2.16135	3.00482	0.868618	3.45931	0.000541565	0.00328056
k__Bacteria(100);p__Tenericutes(100);c__Mollicutes(100);o__RsaHF231(100);o__RsaHF231_unclassified(100);o__RsaHF231_unclassified(100);o__RsaHF231_unclassified(100);.2	3.02191	3.00936	1.15735	2.60021	0.00931661	0.0330995
k__Bacteria(100);p__Firmicutes(100);c__Clostridia(100);o__Clostridiales(100);o__Clostridiales_unclassified(94);o__Clostridiales_unclassified(94);o__Clostridiales_unclassified(94);.1	0.889963	3.02133	0.931946	3.24196	0.0011871	0.00627324
k__Bacteria(100);p__Bacteroidetes(100);c__Bacteroidia(100);o__Bacteroidales(100);f__Porphyromonadaceae(100);g__Dysgonomonas(100);g__Dysgonomonas_unclassified(100);.15	27.4429	3.03016	1.10539	2.74127	0.00612021	0.0234592
k__Bacteria(100);p__Tenericutes(100);c__Mollicutes(100);o__RF39(100);o__RF39_unclassified(100);o__RF39_unclassified(100);o__RF39_unclassified(100);.3	10.1929	3.03787	0.865002	3.51197	0.000444792	0.00276735
k__Bacteria(100);p__Elusimicrobia(100);c__Endomicrobia(100);c__Endomicrobia_unclassified(100);c__Endomicrobia_unclassified(100);c__Endomicrobia_unclassified(100);c__Endomicrobia_unclassified(100);.6	3.16844	3.06827	1.17823	2.60415	0.00921035	0.0328143
k__Bacteria(100);p__Proteobacteria(100);c__Deltaproteobacteria(100);o__Desulfovibrionales(100);f__Desulfovibrionaceae(100);g__Desulfovibrio(100);g__Desulfovibrio_unclassified(100);.2	42.8663	3.0761	0.725953	4.23733	2.26191e-05	0.000218911
k__Bacteria(100);p__Firmicutes(100);p__Firmicutes_unclassified(100);p__Firmicutes_unclassified(100);p__Firmicutes_unclassified(100);p__Firmicutes_unclassified(100);p__Firmicutes_unclassified(100);.6	47.0798	3.08014	0.83861	3.67291	0.000239808	0.00171398
k__Bacteria(100);p__Spirochaetes(100);c__[Leptospirae](100);o__[Leptospirales](100);f__Sediment-4(100);g__SJA-88(100);g__SJA-88_unclassified(100);	28.3718	3.12681	0.645674	4.84271	1.2808e-06	1.94898e-05
k__Bacteria(100);k__Bacteria_unclassified(100);k__Bacteria_unclassified(100);k__Bacteria_unclassified(100);k__Bacteria_unclassified(100);k__Bacteria_unclassified(100);k__Bacteria_unclassified(100);.60	6.48502	3.13716	0.992562	3.16067	0.00157407	0.0080651
k__Bacteria(100);p__Firmicutes(100);c__Clostridia(100);o__Clostridiales(100);f__Dehalobacteriaceae(100);g__Dehalobacterium(100);g__Dehalobacterium_unclassified(100);.9	4.50317	3.18323	1.12531	2.82875	0.00467296	0.0193824
k__Bacteria(100);p__Bacteroidetes(100);c__Bacteroidia(100);o__Bacteroidales(100);f__Porphyromonadaceae(100);g__Parabacteroides(67);g__Parabacteroides_unclassified(67);	467.081	3.18708	0.63936	4.9848	6.20267e-07	1.0174e-05
k__Bacteria(100);p__Deferribacteres(100);c__Deferribacteres(100);o__Deferribacterales(100);f__Deferribacteraceae(100);g__Mucispirillum(100);g__Mucispirillum_unclassified(100);	14.9243	3.19303	1.27736	2.49971	0.0124296	0.0420874
k__Bacteria(100);k__Bacteria_unclassified(100);k__Bacteria_unclassified(100);k__Bacteria_unclassified(100);k__Bacteria_unclassified(100);k__Bacteria_unclassified(100);k__Bacteria_unclassified(100);.99	5.24645	3.21599	1.0082	3.18984	0.00142351	0.00733914
k__Bacteria(100);p__Bacteroidetes(100);c__Bacteroidia(100);o__Bacteroidales(100);f__Porphyromonadaceae(100);f__Porphyromonadaceae_unclassified(100);f__Porphyromonadaceae_unclassified(100);	237.468	3.22593	0.715022	4.51166	6.43232e-06	7.59255e-05
k__Bacteria(100);p__Bacteroidetes(100);c__Bacteroidia(100);o__Bacteroidales(100);f__Bacteroidaceae(96);g__Bacteroides(95);g__Bacteroides_unclassified(95);	976.22	3.2335	0.662045	4.88411	1.03894e-06	1.61005e-05
k__Bacteria(100);p__Lentisphaerae(100);c__[Lentisphaeria](100);o__Victivallales(100);f__Victivallaceae(100);f__Victivallaceae_unclassified(100);f__Victivallaceae_unclassified(100);.1	19.1987	3.27633	0.594078	5.51498	3.48823e-08	7.72918e-07
k__Bacteria(100);p__Firmicutes(100);c__Clostridia(100);o__Clostridiales(100);o__Clostridiales_unclassified(100);o__Clostridiales_unclassified(100);o__Clostridiales_unclassified(100);.25	9.47871	3.2803	1.09729	2.98945	0.00279482	0.0131466
k__Bacteria(100);p__Firmicutes(100);c__Clostridia(100);o__Clostridiales(100);o__Clostridiales_unclassified(100);o__Clostridiales_unclassified(100);o__Clostridiales_unclassified(100);.26	10.1443	3.28728	0.874211	3.76028	0.000169723	0.00127216
k__Bacteria(100);p__Firmicutes(100);c__Clostridia(100);o__Clostridiales(100);f__Lachnospiraceae(100);f__Lachnospiraceae_unclassified(94);f__Lachnospiraceae_unclassified(94);	44.1158	3.31018	0.525123	6.30363	2.90758e-10	1.03444e-08
k__Bacteria(100);p__Firmicutes(100);p__Firmicutes_unclassified(100);p__Firmicutes_unclassified(100);p__Firmicutes_unclassified(100);p__Firmicutes_unclassified(100);p__Firmicutes_unclassified(100);.59	3.29677	3.31076	0.93818	3.52891	0.000417268	0.00260896
k__Bacteria(100);p__Bacteroidetes(100);c__Bacteroidia(100);o__Bacteroidales(100);f__Porphyromonadaceae(100);g__Parabacteroides(100);g__Parabacteroides_unclassified(100);	173.171	3.31286	0.759772	4.36033	1.29865e-05	0.000142625
k__Bacteria(100);p__Firmicutes(100);c__Clostridia(100);o__Clostridiales(100);f__Eubacteriaceae(100);g__Pseudoramibacter_Eubacterium(100);g__Pseudoramibacter_Eubacterium_unclassified(100);.1	7.73851	3.31373	0.944398	3.50883	0.000450089	0.00278658
k__Bacteria(100);p__Firmicutes(100);c__Bacilli(100);o__Lactobacillales(100);o__Lactobacillales_unclassified(99);o__Lactobacillales_unclassified(99);o__Lactobacillales_unclassified(99);	26.5681	3.36056	1.04602	3.2127	0.00131493	0.00687684
k__Bacteria(100);p__Bacteroidetes(100);c__Bacteroidia(100);o__Bacteroidales(100);f__Rikenellaceae(100);f__Rikenellaceae_unclassified(100);f__Rikenellaceae_unclassified(100);.40	6.80898	3.37177	1.24798	2.70178	0.00689699	0.0258723
k__Bacteria(100);p__Tenericutes(100);c__Mollicutes(100);o__RF39(100);o__RF39_unclassified(100);o__RF39_unclassified(100);o__RF39_unclassified(100);.10	5.83296	3.37556	1.27926	2.63867	0.00832319	0.0299492
k__Bacteria(100);p__Firmicutes(100);c__Clostridia(100);o__Clostridiales(100);f__Ruminococcaceae(100);g__Ruminococcus(99);g__Ruminococcus_unclassified(99);.1	5.2183	3.38177	1.2157	2.78174	0.00540679	0.0214741
k__Bacteria(100);p__Bacteroidetes(100);c__Bacteroidia(100);o__Bacteroidales(100);o__Bacteroidales_unclassified(97);o__Bacteroidales_unclassified(97);o__Bacteroidales_unclassified(97);.1	723.834	3.40997	1.15195	2.96017	0.00307467	0.0140643
k__Bacteria(100);p__Tenericutes(100);c__Mollicutes(100);o__RF39(100);o__RF39_unclassified(100);o__RF39_unclassified(100);o__RF39_unclassified(100);	20.5607	3.41068	0.875912	3.89386	9.86623e-05	0.000801354
k__Bacteria(100);p__Firmicutes(100);c__Erysipelotrichi(100);o__Erysipelotrichales(100);f__Erysipelotrichaceae(100);g__RFN20(100);g__RFN20_unclassified(100);	17.8215	3.43879	1.0254	3.35361	0.000797642	0.00451759
k__Bacteria(100);p__Bacteroidetes(100);c__Bacteroidia(100);o__Bacteroidales(100);o__Bacteroidales_unclassified(100);o__Bacteroidales_unclassified(100);o__Bacteroidales_unclassified(100);.10	64.8915	3.4421	1.13926	3.02135	0.00251654	0.0119264
k__Bacteria(100);p__Tenericutes(100);c__Mollicutes(100);o__RF39(100);o__RF39_unclassified(100);o__RF39_unclassified(100);o__RF39_unclassified(100);.4	8.152	3.45325	1.31891	2.61826	0.008838	0.0316215
k__Bacteria(100);k__Bacteria_unclassified(100);k__Bacteria_unclassified(100);k__Bacteria_unclassified(100);k__Bacteria_unclassified(100);k__Bacteria_unclassified(100);k__Bacteria_unclassified(100);.104	4.03095	3.46889	1.06762	3.24918	0.00115737	0.00614185
k__Bacteria(100);p__Deferribacteres(100);c__Deferribacteres(100);o__Deferribacterales(100);f__Deferribacteraceae(87);f__Deferribacteraceae_unclassified(87);f__Deferribacteraceae_unclassified(87);	2.53459	3.47327	0.951467	3.65044	0.000261793	0.00183902
k__Archaea(100);p__Euryarchaeota(100);c__Methanomicrobia(100);o__Methanosarcinales(100);f__Methanosarcinaceae(100);g__Methanimicrococcus(100);s__blatticola(100);	531.271	3.48298	0.557158	6.25133	4.06971e-10	1.3892e-08
k__Bacteria(100);p__Bacteroidetes(100);c__Bacteroidia(100);o__Bacteroidales(100);f__Porphyromonadaceae(100);g__Dysgonomonas(100);g__Dysgonomonas_unclassified(100);.20	22.7801	3.54835	1.34451	2.63914	0.00831164	0.0299492
k__Bacteria(100);k__Bacteria_unclassified(100);k__Bacteria_unclassified(100);k__Bacteria_unclassified(100);k__Bacteria_unclassified(100);k__Bacteria_unclassified(100);k__Bacteria_unclassified(100);.69	4.78815	3.55787	1.31159	2.71264	0.00667505	0.0252036
k__Bacteria(100);k__Bacteria_unclassified(100);k__Bacteria_unclassified(100);k__Bacteria_unclassified(100);k__Bacteria_unclassified(100);k__Bacteria_unclassified(100);k__Bacteria_unclassified(100);.73	6.90377	3.60626	1.16268	3.10169	0.00192417	0.00947456
k__Bacteria(100);p__Bacteroidetes(100);p__Bacteroidetes_unclassified(100);p__Bacteroidetes_unclassified(100);p__Bacteroidetes_unclassified(100);p__Bacteroidetes_unclassified(100);p__Bacteroidetes_unclassified(100);.7	222.835	3.6303	1.36671	2.65624	0.00790182	0.0289275
k__Bacteria(100);p__Tenericutes(100);c__CK-1C4-19(100);c__CK-1C4-19_unclassified(100);c__CK-1C4-19_unclassified(100);c__CK-1C4-19_unclassified(100);c__CK-1C4-19_unclassified(100);	9.22004	3.71146	0.78867	4.70598	2.52653e-06	3.5066e-05
k__Bacteria(100);p__Firmicutes(100);c__Clostridia(100);o__Clostridiales(62);o__Clostridiales_unclassified(62);o__Clostridiales_unclassified(62);o__Clostridiales_unclassified(62);	9.76655	3.71977	0.881083	4.22182	2.42339e-05	0.000230999
k__Bacteria(100);p__Elusimicrobia(100);c__Endomicrobia(100);c__Endomicrobia_unclassified(100);c__Endomicrobia_unclassified(100);c__Endomicrobia_unclassified(100);c__Endomicrobia_unclassified(100);.2	31.7328	3.72083	1.19661	3.10948	0.00187418	0.00928271
k__Bacteria(100);p__Firmicutes(100);c__Clostridia(100);o__Clostridiales(100);o__Clostridiales_unclassified(100);o__Clostridiales_unclassified(100);o__Clostridiales_unclassified(100);.70	1.3472	3.74431	1.2275	3.05036	0.00228567	0.0110605
k__Bacteria(100);k__Bacteria_unclassified(100);k__Bacteria_unclassified(100);k__Bacteria_unclassified(100);k__Bacteria_unclassified(100);k__Bacteria_unclassified(100);k__Bacteria_unclassified(100);.66	6.15144	3.75133	0.809448	4.63443	3.57927e-06	4.75855e-05
k__Bacteria(100);p__Bacteroidetes(100);p__Bacteroidetes_unclassified(100);p__Bacteroidetes_unclassified(100);p__Bacteroidetes_unclassified(100);p__Bacteroidetes_unclassified(100);p__Bacteroidetes_unclassified(100);.19	38.5318	3.79829	0.840944	4.51669	6.28127e-06	7.54476e-05
k__Bacteria(100);p__Firmicutes(100);c__Clostridia(100);o__Clostridiales(100);f__Dehalobacteriaceae(100);g__Dehalobacterium(100);g__Dehalobacterium_unclassified(100);.21	0.60312	3.81418	1.39829	2.72774	0.00637699	0.0243696
k__Bacteria(100);p__Bacteroidetes(100);c__Bacteroidia(100);o__Bacteroidales(100);f__Porphyromonadaceae(100);g__Candidatus_Azobacteroides(100);g__Candidatus_Azobacteroides_unclassified(100);.5	80.8057	3.81521	1.00831	3.78378	0.000154464	0.00117165
k__Bacteria(100);p__Bacteroidetes(100);c__Bacteroidia(100);o__Bacteroidales(100);f__Porphyromonadaceae(100);g__Parabacteroides(89);g__Parabacteroides_unclassified(88);	112.856	3.84159	0.745447	5.1534	2.55804e-07	4.75119e-06
k__Bacteria(100);k__Bacteria_unclassified(100);k__Bacteria_unclassified(100);k__Bacteria_unclassified(100);k__Bacteria_unclassified(100);k__Bacteria_unclassified(100);k__Bacteria_unclassified(100);.30	18.4191	3.84295	1.15855	3.31703	0.000909788	0.00499592
k__Bacteria(100);p__Proteobacteria(100);c__Alphaproteobacteria(100);c__Alphaproteobacteria_unclassified(100);c__Alphaproteobacteria_unclassified(100);c__Alphaproteobacteria_unclassified(100);c__Alphaproteobacteria_unclassified(100);.7	2.34431	3.87542	1.15782	3.34718	0.000816376	0.00457243
k__Bacteria(100);p__Bacteroidetes(100);p__Bacteroidetes_unclassified(100);p__Bacteroidetes_unclassified(100);p__Bacteroidetes_unclassified(100);p__Bacteroidetes_unclassified(100);p__Bacteroidetes_unclassified(100);.10	163.094	3.87921	1.14234	3.39585	0.000684155	0.00400969
k__Bacteria(100);k__Bacteria_unclassified(100);k__Bacteria_unclassified(100);k__Bacteria_unclassified(100);k__Bacteria_unclassified(100);k__Bacteria_unclassified(100);k__Bacteria_unclassified(100);.12	33.3724	3.88101	0.658539	5.89336	3.7843e-09	1.02786e-07
k__Bacteria(100);k__Bacteria_unclassified(100);k__Bacteria_unclassified(100);k__Bacteria_unclassified(100);k__Bacteria_unclassified(100);k__Bacteria_unclassified(100);k__Bacteria_unclassified(100);.19	22.0153	3.93626	1.13031	3.48245	0.000496856	0.00306112
k__Bacteria(100);p__Bacteroidetes(100);c__Bacteroidia(100);o__Bacteroidales(100);o__Bacteroidales_unclassified(100);o__Bacteroidales_unclassified(100);o__Bacteroidales_unclassified(100);.8	98.0083	3.95476	1.09896	3.59864	0.000319882	0.00213199
k__Bacteria(100);p__Firmicutes(100);c__Clostridia(100);o__Clostridiales(100);f__[Mogibacteriaceae](100);f__[Mogibacteriaceae]_unclassified(100);f__[Mogibacteriaceae]_unclassified(100);.6	1.7068	3.96521	1.11848	3.54517	0.000392356	0.00248394
k__Bacteria(100);p__Firmicutes(100);c__Clostridia(100);o__Clostridiales(53);o__Clostridiales_unclassified(53);o__Clostridiales_unclassified(53);o__Clostridiales_unclassified(53);	1.53954	3.96663	1.16872	3.394	0.000688809	0.00402762
k__Bacteria(100);p__Firmicutes(100);c__Clostridia(100);o__Clostridiales(100);f__Dehalobacteriaceae(100);g__Dehalobacterium(100);g__Dehalobacterium_unclassified(100);.11	3.00496	4.00961	0.992485	4.03997	5.34589e-05	0.000476819
k__Bacteria(100);p__Firmicutes(100);p__Firmicutes_unclassified(100);p__Firmicutes_unclassified(100);p__Firmicutes_unclassified(100);p__Firmicutes_unclassified(100);p__Firmicutes_unclassified(100);.28	9.99981	4.01355	1.39753	2.87189	0.00408025	0.0173584
k__Bacteria(100);p__Firmicutes(100);c__Clostridia(100);o__Clostridiales(100);f__Ruminococcaceae(100);f__Ruminococcaceae_unclassified(100);f__Ruminococcaceae_unclassified(100);.34	18.4714	4.04398	1.00515	4.02327	5.73949e-05	0.00050166
k__Bacteria(100);p__Bacteroidetes(100);p__Bacteroidetes_unclassified(100);p__Bacteroidetes_unclassified(100);p__Bacteroidetes_unclassified(100);p__Bacteroidetes_unclassified(100);p__Bacteroidetes_unclassified(100);.21	26.662	4.06592	0.984219	4.13112	3.61004e-05	0.000336493
k__Bacteria(100);p__Bacteroidetes(100);c__Bacteroidia(100);o__Bacteroidales(100);f__Porphyromonadaceae(68);f__Porphyromonadaceae_unclassified(54);f__Porphyromonadaceae_unclassified(54);	0.720507	4.07016	1.49319	2.72581	0.00641442	0.0244387
k__Bacteria(100);p__Proteobacteria(100);c__Alphaproteobacteria(100);o__RF32(84);o__RF32_unclassified(84);o__RF32_unclassified(84);o__RF32_unclassified(84);	37.7815	4.07117	1.16004	3.50952	0.000448924	0.0027862
k__Bacteria(100);p__Bacteroidetes(100);c__Bacteroidia(100);o__Bacteroidales(100);o__Bacteroidales_unclassified(100);o__Bacteroidales_unclassified(100);o__Bacteroidales_unclassified(100);.2	322.982	4.14915	1.37239	3.0233	0.00250034	0.0118719
k__Bacteria(100);p__Firmicutes(100);c__Clostridia(100);o__Clostridiales(100);f__Lachnospiraceae(100);g__Clostridium(56);g__Clostridium_unclassified(56);	27.5153	4.16273	1.05522	3.94489	7.9835e-05	0.000661191
k__Bacteria(100);p__Firmicutes(100);c__Clostridia(100);o__Clostridiales(100);f__Ruminococcaceae(100);f__Ruminococcaceae_unclassified(100);f__Ruminococcaceae_unclassified(100);.35	21.9987	4.18065	0.962595	4.3431	1.40484e-05	0.000152301
k__Bacteria(100);p__Bacteroidetes(100);c__Bacteroidia(100);o__Bacteroidales(100);o__Bacteroidales_unclassified(100);o__Bacteroidales_unclassified(100);o__Bacteroidales_unclassified(100);.5	254.336	4.19137	0.929947	4.50711	6.57167e-06	7.72095e-05
k__Bacteria(100);p__Firmicutes(100);c__Clostridia(100);o__Clostridiales(100);f__Ruminococcaceae(100);f__Ruminococcaceae_unclassified(100);f__Ruminococcaceae_unclassified(100);.64	8.74421	4.21074	1.15358	3.65014	0.000262097	0.00183902
k__Bacteria(100);p__Tenericutes(100);c__Mollicutes(100);o__Acholeplasmatales(100);f__Acholeplasmataceae(100);g__Acholeplasma(100);g__Acholeplasma_unclassified(100);	206.162	4.21973	0.659469	6.39868	1.56724e-10	5.90871e-09
k__Bacteria(100);p__Firmicutes(100);c__Clostridia(100);o__Clostridiales(100);f__Ruminococcaceae(100);f__Ruminococcaceae_unclassified(100);f__Ruminococcaceae_unclassified(100);.76	5.69142	4.24548	0.97708	4.34507	1.39228e-05	0.000151591
k__Bacteria(100);p__Tenericutes(100);c__Mollicutes(100);o__RF39(100);o__RF39_unclassified(100);o__RF39_unclassified(100);o__RF39_unclassified(100);.42	0.763709	4.28107	1.40414	3.0489	0.0022968	0.0110931
k__Bacteria(100);k__Bacteria_unclassified(100);k__Bacteria_unclassified(100);k__Bacteria_unclassified(100);k__Bacteria_unclassified(100);k__Bacteria_unclassified(100);k__Bacteria_unclassified(100);.37	22.4956	4.28964	1.06473	4.02885	5.60496e-05	0.000494389
k__Bacteria(100);p__Proteobacteria(100);c__Deltaproteobacteria(100);o__Desulfarculales(100);f__Desulfarculaceae(100);g__Desulfarculus(100);g__Desulfarculus_unclassified(100);.1	1.80396	4.31398	1.21823	3.54119	0.000398321	0.0025154
k__Bacteria(100);p__Bacteroidetes(100);c__Bacteroidia(100);o__Bacteroidales(100);f__Porphyromonadaceae(100);g__Dysgonomonas(52);g__Dysgonomonas_unclassified(52);	30.3106	4.32616	0.904815	4.78126	1.74196e-06	2.54346e-05
k__Bacteria(100);p__Proteobacteria(100);c__Deltaproteobacteria(100);o__Desulfovibrionales(100);f__Desulfovibrionaceae(100);g__Desulfovibrio(100);g__Desulfovibrio_unclassified(100);.34	0.698359	4.34431	1.49874	2.89864	0.00374784	0.0163225
k__Bacteria(100);p__Firmicutes(100);c__Clostridia(100);o__Clostridiales(100);f__Ruminococcaceae(100);g__Ruminococcus(100);g__Ruminococcus_unclassified(100);.7	14.1283	4.3576	0.974704	4.47069	7.79683e-06	8.9428e-05
k__Bacteria(100);p__Proteobacteria(100);c__Betaproteobacteria(100);o__Burkholderiales(100);f__Comamonadaceae(100);f__Comamonadaceae_unclassified(88);f__Comamonadaceae_unclassified(88);	3.79293	4.36933	1.29207	3.38164	0.000720557	0.00416505
k__Bacteria(100);p__Firmicutes(100);c__Clostridia(100);o__Clostridiales(100);f__Lachnospiraceae(100);g__Clostridium(100);g__Clostridium_unclassified(100);.6	17.935	4.38261	1.5607	2.80811	0.00498335	0.0202054
k__Bacteria(100);p__Bacteroidetes(100);c__Bacteroidia(100);o__Bacteroidales(100);f__Porphyromonadaceae(100);g__Paludibacter(100);g__Paludibacter_unclassified(100);	100.925	4.42925	0.815717	5.42988	5.63912e-08	1.21747e-06
k__Bacteria(100);k__Bacteria_unclassified(100);k__Bacteria_unclassified(100);k__Bacteria_unclassified(100);k__Bacteria_unclassified(100);k__Bacteria_unclassified(100);k__Bacteria_unclassified(100);.44	10.4853	4.4791	1.01774	4.40104	1.07732e-05	0.000121487
k__Bacteria(100);k__Bacteria_unclassified(100);k__Bacteria_unclassified(100);k__Bacteria_unclassified(100);k__Bacteria_unclassified(100);k__Bacteria_unclassified(100);k__Bacteria_unclassified(100);.143	1.61377	4.48704	1.83199	2.44928	0.0143144	0.0474515
k__Bacteria(100);p__Bacteroidetes(100);c__Bacteroidia(100);o__Bacteroidales(100);o__Bacteroidales_unclassified(100);o__Bacteroidales_unclassified(100);o__Bacteroidales_unclassified(100);.14	45.4931	4.50955	1.63481	2.75846	0.00580746	0.022534
k__Bacteria(100);p__Firmicutes(100);c__Clostridia(100);o__Clostridiales(100);o__Clostridiales_unclassified(100);o__Clostridiales_unclassified(100);o__Clostridiales_unclassified(100);.49	2.8284	4.53362	1.71532	2.64301	0.00821721	0.0296948
k__Bacteria(100);p__Spirochaetes(100);c__Spirochaetes(100);o__Spirochaetales(100);f__Spirochaetaceae(100);g__Treponema(100);g__Treponema_unclassified(100);.4	7.73046	4.54866	1.12917	4.02834	5.61717e-05	0.000494389
k__Bacteria(100);p__Firmicutes(100);c__Clostridia(100);o__Clostridiales(98);f__Ruminococcaceae(97);f__Ruminococcaceae_unclassified(97);f__Ruminococcaceae_unclassified(97);	1.00432	4.56775	1.64012	2.78501	0.00535256	0.0213595
k__Bacteria(100);p__Firmicutes(100);c__Clostridia(100);o__Clostridiales(100);f__Ruminococcaceae(100);f__Ruminococcaceae_unclassified(100);f__Ruminococcaceae_unclassified(100);.177	0.758276	4.59745	1.27856	3.59581	0.000323386	0.00214403
k__Bacteria(100);p__Tenericutes(100);c__Mollicutes(100);o__RF39(100);o__RF39_unclassified(100);o__RF39_unclassified(100);o__RF39_unclassified(100);.8	9.84418	4.60703	1.25317	3.67629	0.000236654	0.0017031
k__Bacteria(100);p__Firmicutes(100);c__Clostridia(100);o__Clostridiales(100);o__Clostridiales_unclassified(100);o__Clostridiales_unclassified(100);o__Clostridiales_unclassified(100);.8	24.1736	4.61153	1.09974	4.19328	2.74953e-05	0.000261102
k__Bacteria(100);p__Proteobacteria(100);c__Alphaproteobacteria(100);o__RF32(100);o__RF32_unclassified(100);o__RF32_unclassified(100);o__RF32_unclassified(100);.12	3.80778	4.6433	1.70343	2.72585	0.00641356	0.0244387
k__Bacteria(100);p__Proteobacteria(100);c__Deltaproteobacteria(100);c__Deltaproteobacteria_unclassified(96);c__Deltaproteobacteria_unclassified(96);c__Deltaproteobacteria_unclassified(96);c__Deltaproteobacteria_unclassified(96);	46.2241	4.6545	1.37921	3.37475	0.000738822	0.00424151
k__Bacteria(100);p__Elusimicrobia(100);c__Elusimicrobia(100);o__Elusimicrobiales(100);f__Elusimicrobiaceae(100);g__Elusimicrobium(100);s__minutum(100);.3	2.97009	4.66572	1.4912	3.12884	0.00175499	0.00877844
k__Archaea(100);p__Euryarchaeota(100);c__Thermoplasmata(100);o__E2(100);f__[Methanomassiliicoccaceae](100);g__vadinCA11(100);g__vadinCA11_unclassified(100);	409.229	4.68815	0.888276	5.27781	1.30738e-07	2.56002e-06
k__Bacteria(100);p__Bacteroidetes(100);c__Bacteroidia(100);o__Bacteroidales(100);f__Rikenellaceae(100);f__Rikenellaceae_unclassified(100);f__Rikenellaceae_unclassified(100);.3	122.993	4.72868	1.11803	4.22947	2.3424e-05	0.000225534
k__Bacteria(100);p__Firmicutes(100);c__Clostridia(100);o__Clostridiales(100);f__Ruminococcaceae(100);f__Ruminococcaceae_unclassified(100);f__Ruminococcaceae_unclassified(100);.116	3.72703	4.74659	1.38985	3.41518	0.000637392	0.00379729
k__Bacteria(100);p__Firmicutes(100);c__Clostridia(100);o__Clostridiales(100);f__Ruminococcaceae(100);g__Oscillospira(100);g__Oscillospira_unclassified(100);.7	2.29307	4.75071	1.39266	3.41125	0.000646646	0.00382536
k__Bacteria(100);p__Firmicutes(100);p__Firmicutes_unclassified(100);p__Firmicutes_unclassified(100);p__Firmicutes_unclassified(100);p__Firmicutes_unclassified(100);p__Firmicutes_unclassified(100);.52	3.65184	4.75229	1.27553	3.72573	0.000194752	0.00144265
k__Bacteria(100);p__Firmicutes(100);p__Firmicutes_unclassified(100);p__Firmicutes_unclassified(100);p__Firmicutes_unclassified(100);p__Firmicutes_unclassified(100);p__Firmicutes_unclassified(100);.38	6.51272	4.76417	1.4396	3.30937	0.000935069	0.00512361
k__Bacteria(100);p__Bacteroidetes(100);c__Bacteroidia(100);o__Bacteroidales(100);o__Bacteroidales_unclassified(100);o__Bacteroidales_unclassified(100);o__Bacteroidales_unclassified(100);.4	288.233	4.8012	0.853447	5.62566	1.84803e-08	4.48858e-07
k__Bacteria(100);p__Firmicutes(100);c__Clostridia(100);o__Clostridiales(100);f__Lachnospiraceae(100);f__Lachnospiraceae_unclassified(100);f__Lachnospiraceae_unclassified(100);.19	32.4234	4.84412	1.82889	2.64867	0.00808098	0.0294129
k__Bacteria(100);p__Firmicutes(100);c__Clostridia(100);o__Clostridiales(100);f__Christensenellaceae(100);f__Christensenellaceae_unclassified(100);f__Christensenellaceae_unclassified(100);.4	14.4562	4.86198	1.14489	4.24669	2.16956e-05	0.000211595
k__Bacteria(100);p__Tenericutes(100);c__Mollicutes(100);o__RF39(100);o__RF39_unclassified(100);o__RF39_unclassified(100);o__RF39_unclassified(100);.13	5.25339	4.88844	1.7436	2.80365	0.00505278	0.020454
k__Bacteria(100);p__Tenericutes(100);c__Mollicutes(100);o__RF39(100);o__RF39_unclassified(100);o__RF39_unclassified(100);o__RF39_unclassified(100);.15	3.0123	4.9282	1.82006	2.70771	0.00677497	0.0254666
k__Bacteria(100);k__Bacteria_unclassified(100);k__Bacteria_unclassified(100);k__Bacteria_unclassified(100);k__Bacteria_unclassified(100);k__Bacteria_unclassified(100);k__Bacteria_unclassified(100);	172.432	4.93821	1.51054	3.26916	0.00107866	0.00576112
k__Bacteria(100);p__Proteobacteria(100);c__Deltaproteobacteria(100);o__Desulfovibrionales(100);f__Desulfovibrionaceae(100);g__Desulfovibrio(100);g__Desulfovibrio_unclassified(100);.17	6.71624	4.94518	1.15456	4.28316	1.84258e-05	0.000186174
k__Bacteria(100);p__Proteobacteria(100);c__Deltaproteobacteria(100);c__Deltaproteobacteria_unclassified(100);c__Deltaproteobacteria_unclassified(100);c__Deltaproteobacteria_unclassified(100);c__Deltaproteobacteria_unclassified(100);.3	13.2924	4.96345	1.06332	4.66786	3.04349e-06	4.13325e-05
k__Bacteria(100);p__Firmicutes(100);p__Firmicutes_unclassified(100);p__Firmicutes_unclassified(100);p__Firmicutes_unclassified(100);p__Firmicutes_unclassified(100);p__Firmicutes_unclassified(100);.9	26.968	5.00167	1.06862	4.68048	2.86197e-06	3.95046e-05
k__Bacteria(100);p__Firmicutes(100);p__Firmicutes_unclassified(100);p__Firmicutes_unclassified(100);p__Firmicutes_unclassified(100);p__Firmicutes_unclassified(100);p__Firmicutes_unclassified(100);.34	4.38263	5.01122	1.74567	2.87065	0.00409631	0.0173904
k__Bacteria(100);p__Firmicutes(100);p__Firmicutes_unclassified(100);p__Firmicutes_unclassified(100);p__Firmicutes_unclassified(100);p__Firmicutes_unclassified(100);p__Firmicutes_unclassified(100);.27	11.2781	5.04389	1.70371	2.96053	0.0030711	0.0140643
k__Bacteria(100);k__Bacteria_unclassified(100);k__Bacteria_unclassified(100);k__Bacteria_unclassified(100);k__Bacteria_unclassified(100);k__Bacteria_unclassified(100);k__Bacteria_unclassified(100);.175	3.29476	5.11191	1.64594	3.10577	0.00189786	0.00938159
k__Bacteria(100);p__Proteobacteria(100);p__Proteobacteria_unclassified(100);p__Proteobacteria_unclassified(100);p__Proteobacteria_unclassified(100);p__Proteobacteria_unclassified(100);p__Proteobacteria_unclassified(100);.24	5.16917	5.15807	2.12304	2.42957	0.0151169	0.0495914
k__Bacteria(100);p__Firmicutes(100);c__Clostridia(100);o__Clostridiales(100);o__Clostridiales_unclassified(100);o__Clostridiales_unclassified(100);o__Clostridiales_unclassified(100);.7	27.7557	5.19429	1.96195	2.64751	0.00810868	0.0294713
k__Bacteria(100);p__Firmicutes(100);c__Clostridia(100);o__Clostridiales(100);f__Ruminococcaceae(100);f__Ruminococcaceae_unclassified(100);f__Ruminococcaceae_unclassified(100);.42	19.9108	5.19942	1.43483	3.62373	0.000290385	0.00199324
k__Bacteria(100);k__Bacteria_unclassified(100);k__Bacteria_unclassified(100);k__Bacteria_unclassified(100);k__Bacteria_unclassified(100);k__Bacteria_unclassified(100);k__Bacteria_unclassified(100);.35	15.5045	5.20365	1.22061	4.26316	2.01553e-05	0.000199146
k__Bacteria(100);p__SR1(100);p__SR1_unclassified(100);p__SR1_unclassified(100);p__SR1_unclassified(100);p__SR1_unclassified(100);p__SR1_unclassified(100);	38.9229	5.27854	1.10316	4.78494	1.71035e-06	2.51182e-05
k__Bacteria(100);p__Firmicutes(100);c__Clostridia(100);o__Clostridiales(100);f__Ruminococcaceae(100);f__Ruminococcaceae_unclassified(100);f__Ruminococcaceae_unclassified(100);.49	9.15035	5.29493	1.241	4.26667	1.98416e-05	0.000197322
k__Bacteria(100);p__Tenericutes(100);c__Mollicutes(100);c__Mollicutes_unclassified(74);c__Mollicutes_unclassified(74);c__Mollicutes_unclassified(74);c__Mollicutes_unclassified(74);	2.12137	5.32549	1.28783	4.13525	3.54574e-05	0.000331724
k__Bacteria(100);p__Proteobacteria(100);c__Deltaproteobacteria(100);o__Desulfobacterales(100);f__Desulfobacteraceae(100);f__Desulfobacteraceae_unclassified(100);f__Desulfobacteraceae_unclassified(100);.2	9.50682	5.3351	1.45518	3.66629	0.000246095	0.00175109
k__Bacteria(100);p__Firmicutes(100);c__Clostridia(100);o__Clostridiales(100);o__Clostridiales_unclassified(100);o__Clostridiales_unclassified(100);o__Clostridiales_unclassified(100);.57	1.90913	5.35225	1.04591	5.11734	3.09871e-07	5.59096e-06
k__Bacteria(100);p__Firmicutes(100);c__Clostridia(100);o__Clostridiales(100);f__Ruminococcaceae(100);f__Ruminococcaceae_unclassified(100);f__Ruminococcaceae_unclassified(100);.87	6.17009	5.382	1.33084	4.04406	5.25337e-05	0.000470568
k__Bacteria(100);p__Proteobacteria(100);c__Alphaproteobacteria(100);o__RF32(100);o__RF32_unclassified(100);o__RF32_unclassified(100);o__RF32_unclassified(100);.18	1.83247	5.50194	1.94185	2.83335	0.0046063	0.0192005
k__Bacteria(100);p__Firmicutes(100);c__Clostridia(100);o__Clostridiales(100);f__Lachnospiraceae(100);f__Lachnospiraceae_unclassified(100);f__Lachnospiraceae_unclassified(100);.63	2.04124	5.50315	1.88853	2.91399	0.0035684	0.0157584
k__Bacteria(100);p__Bacteroidetes(100);c__Bacteroidia(100);o__Bacteroidales(100);f__Porphyromonadaceae(100);f__Porphyromonadaceae_unclassified(100);f__Porphyromonadaceae_unclassified(100);.25	3.30326	5.53286	1.60764	3.44161	0.000578271	0.00348619
k__Bacteria(100);p__Firmicutes(100);c__Clostridia(100);o__Clostridiales(100);f__Lachnospiraceae(100);f__Lachnospiraceae_unclassified(100);f__Lachnospiraceae_unclassified(100);.34	7.55084	5.57086	1.4498	3.84252	0.00012178	0.000958304
k__Bacteria(100);p__Firmicutes(100);c__Clostridia(100);o__Clostridiales(100);f__Ruminococcaceae(100);f__Ruminococcaceae_unclassified(100);f__Ruminococcaceae_unclassified(100);.113	3.73739	5.57637	1.53461	3.63375	0.000279334	0.00192786
k__Bacteria(100);p__Spirochaetes(100);c__Spirochaetes(100);c__Spirochaetes_unclassified(100);c__Spirochaetes_unclassified(100);c__Spirochaetes_unclassified(100);c__Spirochaetes_unclassified(100);	3.49062	5.63384	1.27697	4.41187	1.02481e-05	0.000116083
k__Bacteria(100);p__Bacteroidetes(100);c__Bacteroidia(100);o__Bacteroidales(100);f__Porphyromonadaceae(100);g__Paludibacter(100);g__Paludibacter_unclassified(100);.7	38.7583	5.648	1.33141	4.2421	2.21433e-05	0.000215131
k__Bacteria(100);k__Bacteria_unclassified(100);k__Bacteria_unclassified(100);k__Bacteria_unclassified(100);k__Bacteria_unclassified(100);k__Bacteria_unclassified(100);k__Bacteria_unclassified(100);.45	12.6689	5.67984	1.76357	3.22064	0.00127904	0.00670303
k__Bacteria(100);p__Firmicutes(100);c__Bacilli(100);o__Lactobacillales(100);f__Lactobacillaceae(100);g__Lactobacillus(100);g__Lactobacillus_unclassified(100);	226.039	5.68002	1.15475	4.91885	8.7056e-07	1.39179e-05
k__Bacteria(100);k__Bacteria_unclassified(100);k__Bacteria_unclassified(100);k__Bacteria_unclassified(100);k__Bacteria_unclassified(100);k__Bacteria_unclassified(100);k__Bacteria_unclassified(100);.182	1.60055	5.68059	1.47778	3.844	0.000121045	0.000955497
k__Bacteria(100);p__Firmicutes(100);c__Clostridia(100);o__Clostridiales(100);f__Lachnospiraceae(100);f__Lachnospiraceae_unclassified(100);f__Lachnospiraceae_unclassified(100);.50	3.39838	5.6856	1.7254	3.29524	0.000983361	0.00536331
k__Bacteria(100);p__Proteobacteria(100);c__Alphaproteobacteria(100);o__RF32(100);o__RF32_unclassified(100);o__RF32_unclassified(100);o__RF32_unclassified(100);.10	4.01978	5.72118	1.75561	3.25881	0.00111881	0.00594973
k__Bacteria(100);p__Firmicutes(100);c__Clostridia(100);o__Clostridiales(100);f__Lachnospiraceae(100);f__Lachnospiraceae_unclassified(100);f__Lachnospiraceae_unclassified(100);.15	39.938	5.7457	1.11576	5.1496	2.61049e-07	4.78418e-06
k__Bacteria(100);p__SR1(100);p__SR1_unclassified(100);p__SR1_unclassified(100);p__SR1_unclassified(100);p__SR1_unclassified(100);p__SR1_unclassified(100);.1	24.9121	5.76635	1.24537	4.63022	3.65276e-06	4.80567e-05
k__Bacteria(100);p__Proteobacteria(100);c__Alphaproteobacteria(100);c__Alphaproteobacteria_unclassified(100);c__Alphaproteobacteria_unclassified(100);c__Alphaproteobacteria_unclassified(100);c__Alphaproteobacteria_unclassified(100);.9	1.8413	5.78362	2.27563	2.54155	0.0110364	0.0381366
k__Bacteria(100);p__Firmicutes(100);c__Clostridia(100);o__Clostridiales(100);f__Lachnospiraceae(100);f__Lachnospiraceae_unclassified(100);f__Lachnospiraceae_unclassified(100);.20	18.2174	5.81506	1.58058	3.67906	0.000234099	0.0016926
k__Bacteria(100);p__Firmicutes(100);c__Clostridia(100);o__Clostridiales(100);f__Ruminococcaceae(100);g__Oscillospira(90);g__Oscillospira_unclassified(90);	7.50512	5.84747	1.2708	4.60141	4.19633e-06	5.3535e-05
k__Bacteria(100);p__Firmicutes(100);c__Clostridia(100);o__Clostridiales(100);f__Lachnospiraceae(100);f__Lachnospiraceae_unclassified(100);f__Lachnospiraceae_unclassified(100);.28	11.9676	5.85566	1.86761	3.13538	0.00171634	0.00867093
k__Bacteria(100);p__Bacteroidetes(100);c__Bacteroidia(100);o__Bacteroidales(100);f__Porphyromonadaceae(100);g__Dysgonomonas(100);g__Dysgonomonas_unclassified(100);.4	58.6556	5.86928	0.964917	6.08268	1.18189e-09	3.59693e-08
k__Bacteria(100);p__Firmicutes(100);p__Firmicutes_unclassified(100);p__Firmicutes_unclassified(100);p__Firmicutes_unclassified(100);p__Firmicutes_unclassified(100);p__Firmicutes_unclassified(100);.73	1.75064	5.95647	1.86734	3.18981	0.00142367	0.00733914
k__Bacteria(100);k__Bacteria_unclassified(100);k__Bacteria_unclassified(100);k__Bacteria_unclassified(100);k__Bacteria_unclassified(100);k__Bacteria_unclassified(100);k__Bacteria_unclassified(100);.185	1.55803	6.02238	2.34737	2.56558	0.0103003	0.0358383
k__Bacteria(100);p__Firmicutes(100);c__Clostridia(100);o__Clostridiales(100);o__Clostridiales_unclassified(100);o__Clostridiales_unclassified(100);o__Clostridiales_unclassified(100);.23	13.2606	6.0518	1.33183	4.54397	5.52049e-06	6.7366e-05
k__Bacteria(100);p__GN02(100);c__BD1-5(100);c__BD1-5_unclassified(100);c__BD1-5_unclassified(100);c__BD1-5_unclassified(100);c__BD1-5_unclassified(100);.4	3.38322	6.05321	2.10715	2.8727	0.00406985	0.0173584
k__Bacteria(100);p__Bacteroidetes(100);p__Bacteroidetes_unclassified(100);p__Bacteroidetes_unclassified(100);p__Bacteroidetes_unclassified(100);p__Bacteroidetes_unclassified(100);p__Bacteroidetes_unclassified(100);.47	7.07507	6.07269	1.70847	3.55447	0.000378746	0.00240985
k__Bacteria(100);p__Firmicutes(100);c__Clostridia(100);o__Clostridiales(100);f__Lachnospiraceae(100);g__Clostridium(100);g__Clostridium_unclassified(100);.1	19.7834	6.07922	1.59149	3.81984	0.000133538	0.00103471
k__Bacteria(100);p__Proteobacteria(100);p__Proteobacteria_unclassified(100);p__Proteobacteria_unclassified(100);p__Proteobacteria_unclassified(100);p__Proteobacteria_unclassified(100);p__Proteobacteria_unclassified(100);.41	2.98925	6.08205	1.31141	4.63779	3.52156e-06	4.70659e-05
k__Bacteria(100);p__Firmicutes(100);c__Clostridia(100);o__Clostridiales(100);f__Lachnospiraceae(100);f__Lachnospiraceae_unclassified(100);f__Lachnospiraceae_unclassified(100);.61	2.28595	6.10069	1.75723	3.47176	0.000517055	0.00315479
k__Bacteria(100);p__Firmicutes(100);c__Clostridia(100);o__Clostridiales(100);f__Ruminococcaceae(100);f__Ruminococcaceae_unclassified(100);f__Ruminococcaceae_unclassified(100);.103	2.16885	6.1139	1.70794	3.57968	0.000344011	0.00222814
k__Bacteria(100);p__Firmicutes(100);p__Firmicutes_unclassified(100);p__Firmicutes_unclassified(100);p__Firmicutes_unclassified(100);p__Firmicutes_unclassified(100);p__Firmicutes_unclassified(100);.37	8.13581	6.12232	1.96306	3.11877	0.00181606	0.00903026
k__Bacteria(100);p__Bacteroidetes(100);c__Bacteroidia(100);o__Bacteroidales(100);f__Rikenellaceae(100);f__Rikenellaceae_unclassified(100);f__Rikenellaceae_unclassified(100);.53	4.74335	6.13703	1.06256	5.7757	7.66326e-09	2.03762e-07
k__Bacteria(100);p__Bacteroidetes(100);c__Bacteroidia(100);o__Bacteroidales(100);f__Porphyromonadaceae(100);g__Dysgonomonas(100);g__Dysgonomonas_unclassified(100);.1	110.596	6.14048	0.793422	7.73923	1.00024e-14	6.31653e-13
k__Bacteria(100);p__Bacteroidetes(100);c__Bacteroidia(100);o__Bacteroidales(100);f__Porphyromonadaceae(100);g__Dysgonomonas(100);g__Dysgonomonas_unclassified(100);.35	4.92722	6.17451	1.16686	5.29154	1.2129e-07	2.41243e-06
k__Bacteria(100);p__Firmicutes(100);c__Clostridia(100);o__Clostridiales(100);f__Ruminococcaceae(100);f__Ruminococcaceae_unclassified(100);f__Ruminococcaceae_unclassified(100);.63	9.53349	6.17591	1.43126	4.31502	1.59589e-05	0.00016727
k__Bacteria(100);p__Tenericutes(100);c__Mollicutes(100);o__RF39(100);o__RF39_unclassified(100);o__RF39_unclassified(100);o__RF39_unclassified(100);.6	10.433	6.17646	1.54063	4.00906	6.09619e-05	0.000529174
k__Bacteria(100);p__Firmicutes(100);c__Clostridia(100);o__Clostridiales(100);f__Ruminococcaceae(100);f__Ruminococcaceae_unclassified(55);f__Ruminococcaceae_unclassified(55);.1	3.5773	6.19404	1.84291	3.36101	0.00077658	0.00441811
k__Bacteria(100);p__Firmicutes(100);c__Clostridia(100);o__Clostridiales(100);f__Lachnospiraceae(100);f__Lachnospiraceae_unclassified(100);f__Lachnospiraceae_unclassified(100);.17	27.3507	6.20488	0.991023	6.26109	3.82304e-10	1.34125e-08
k__Bacteria(100);p__Firmicutes(100);p__Firmicutes_unclassified(100);p__Firmicutes_unclassified(100);p__Firmicutes_unclassified(100);p__Firmicutes_unclassified(100);p__Firmicutes_unclassified(100);.39	6.06679	6.20915	1.69439	3.66453	0.000247795	0.00175823
k__Bacteria(100);p__Firmicutes(100);c__Clostridia(100);o__Clostridiales(100);f__Ruminococcaceae(100);g__Ruminococcus(100);g__Ruminococcus_unclassified(100);.16	4.34786	6.24954	2.1456	2.91272	0.00358294	0.015771
k__Bacteria(100);p__Bacteroidetes(100);p__Bacteroidetes_unclassified(100);p__Bacteroidetes_unclassified(100);p__Bacteroidetes_unclassified(100);p__Bacteroidetes_unclassified(100);p__Bacteroidetes_unclassified(100);.66	4.68408	6.25285	1.25614	4.97784	6.42982e-07	1.04785e-05
k__Bacteria(100);p__Proteobacteria(100);c__Alphaproteobacteria(100);o__RF32(100);o__RF32_unclassified(100);o__RF32_unclassified(100);o__RF32_unclassified(100);.16	3.03371	6.2643	1.87607	3.33906	0.000840628	0.00467715
k__Bacteria(100);p__Firmicutes(100);c__Clostridia(100);o__Clostridiales(100);f__Lachnospiraceae(100);f__Lachnospiraceae_unclassified(100);f__Lachnospiraceae_unclassified(100);.22	34.9264	6.27019	1.31601	4.76455	1.89278e-06	2.71656e-05
k__Bacteria(100);k__Bacteria_unclassified(100);k__Bacteria_unclassified(100);k__Bacteria_unclassified(100);k__Bacteria_unclassified(100);k__Bacteria_unclassified(100);k__Bacteria_unclassified(100);.156	1.75326	6.28719	2.33032	2.69799	0.00697599	0.0260286
k__Bacteria(100);p__Firmicutes(100);c__Clostridia(100);o__Clostridiales(99);o__Clostridiales_unclassified(99);o__Clostridiales_unclassified(99);o__Clostridiales_unclassified(99);	31.9722	6.35515	2.12776	2.98679	0.00281927	0.0131879
k__Bacteria(100);p__Firmicutes(100);c__Erysipelotrichi(100);o__Erysipelotrichales(100);f__Erysipelotrichaceae(100);g__Clostridium(100);g__Clostridium_unclassified(100);	32.9489	6.38444	1.40886	4.53163	5.85298e-06	7.07398e-05
k__Bacteria(100);p__Verrucomicrobia(100);c__Verruco-5(100);o__LD1-PB3(100);o__LD1-PB3_unclassified(100);o__LD1-PB3_unclassified(100);o__LD1-PB3_unclassified(100);	43.7019	6.4215	0.839186	7.65205	1.97796e-14	1.21862e-12
k__Bacteria(100);p__Firmicutes(100);c__Clostridia(100);o__Clostridiales(100);f__Lachnospiraceae(100);f__Lachnospiraceae_unclassified(100);f__Lachnospiraceae_unclassified(100);.30	7.32899	6.43077	1.34238	4.79057	1.66307e-06	2.47113e-05
k__Bacteria(100);p__GN02(100);c__BD1-5(100);c__BD1-5_unclassified(100);c__BD1-5_unclassified(100);c__BD1-5_unclassified(100);c__BD1-5_unclassified(100);.14	1.99252	6.45138	1.76907	3.64677	0.000265558	0.00184793
k__Bacteria(100);p__Bacteroidetes(100);p__Bacteroidetes_unclassified(100);p__Bacteroidetes_unclassified(100);p__Bacteroidetes_unclassified(100);p__Bacteroidetes_unclassified(100);p__Bacteroidetes_unclassified(100);.6	291.163	6.45829	1.3487	4.78853	1.68004e-06	2.48174e-05
k__Bacteria(100);p__Firmicutes(100);c__Clostridia(100);o__Clostridiales(100);f__Ruminococcaceae(100);f__Ruminococcaceae_unclassified(100);f__Ruminococcaceae_unclassified(100);.33	23.6633	6.48623	1.04599	6.20107	5.60812e-10	1.88882e-08
k__Bacteria(100);k__Bacteria_unclassified(100);k__Bacteria_unclassified(100);k__Bacteria_unclassified(100);k__Bacteria_unclassified(100);k__Bacteria_unclassified(100);k__Bacteria_unclassified(100);.84	5.33509	6.52214	1.27766	5.10476	3.31215e-07	5.8919e-06
k__Bacteria(100);p__Elusimicrobia(100);c__Elusimicrobia(100);o__Elusimicrobiales(100);f__Elusimicrobiaceae(100);g__Elusimicrobium(100);s__minutum(100);.2	4.19985	6.55146	2.32168	2.82186	0.00477464	0.019583
k__Bacteria(100);p__Bacteroidetes(100);c__Flavobacteriia(100);o__Flavobacteriales(100);f__Flavobacteriaceae(100);g__Flavobacterium(100);s__succinicans(100);	2.57403	6.57506	2.5596	2.56878	0.0102057	0.0356146
k__Bacteria(100);p__Elusimicrobia(100);c__Elusimicrobia(100);o__Elusimicrobiales(100);f__Elusimicrobiaceae(100);f__Elusimicrobiaceae_unclassified(100);f__Elusimicrobiaceae_unclassified(100);.1	5.0644	6.76262	1.70677	3.96224	7.42508e-05	0.000627283
k__Bacteria(100);p__Firmicutes(100);p__Firmicutes_unclassified(100);p__Firmicutes_unclassified(100);p__Firmicutes_unclassified(100);p__Firmicutes_unclassified(100);p__Firmicutes_unclassified(100);.55	3.44215	7.06547	1.74384	4.05166	5.08549e-05	0.000457151
k__Bacteria(100);k__Bacteria_unclassified(100);k__Bacteria_unclassified(100);k__Bacteria_unclassified(100);k__Bacteria_unclassified(100);k__Bacteria_unclassified(100);k__Bacteria_unclassified(100);.55	6.67086	7.10033	1.12405	6.31676	2.671e-10	9.63851e-09
k__Bacteria(100);p__Firmicutes(100);c__Clostridia(100);o__Clostridiales(100);f__Lachnospiraceae(100);g__Clostridium(100);g__Clostridium_unclassified(100);.9	8.13762	7.13226	1.76571	4.03931	5.36091e-05	0.000476819
k__Bacteria(100);p__Bacteroidetes(100);c__Bacteroidia(100);o__Bacteroidales(100);f__Porphyromonadaceae(100);g__Candidatus_Azobacteroides(100);g__Candidatus_Azobacteroides_unclassified(100);.31	9.32712	7.16468	1.55206	4.61623	3.90767e-06	5.06193e-05
k__Bacteria(100);p__Firmicutes(100);c__Clostridia(100);o__Clostridiales(100);f__Ruminococcaceae(100);f__Ruminococcaceae_unclassified(100);f__Ruminococcaceae_unclassified(100);.68	6.97158	7.21451	1.01295	7.12225	1.06176e-12	5.36401e-11
k__Bacteria(100);p__Firmicutes(100);c__Clostridia(100);o__Clostridiales(100);f__Ruminococcaceae(100);g__Ruminococcus(100);g__Ruminococcus_unclassified(100);.2	43.0896	7.22766	2.02176	3.57494	0.000350307	0.00226311
k__Bacteria(100);p__Actinobacteria(100);c__Actinobacteria(100);o__Actinomycetales(100);f__ACK-M1(100);f__ACK-M1_unclassified(100);f__ACK-M1_unclassified(100);.1	3.35459	7.22797	2.39467	3.01836	0.00254147	0.012022
k__Bacteria(100);p__Firmicutes(100);c__Clostridia(100);o__Clostridiales(100);o__Clostridiales_unclassified(100);o__Clostridiales_unclassified(100);o__Clostridiales_unclassified(100);.34	4.68564	7.25063	1.17826	6.15367	7.57091e-10	2.48365e-08
k__Bacteria(100);p__Tenericutes(100);c__Mollicutes(100);o__Mycoplasmatales(100);f__Mycoplasmataceae(100);g__Mycoplasma(100);s__penetrans(97);	7.10918	7.31011	1.2454	5.8697	4.36594e-09	1.17323e-07
k__Bacteria(100);p__Proteobacteria(100);p__Proteobacteria_unclassified(100);p__Proteobacteria_unclassified(100);p__Proteobacteria_unclassified(100);p__Proteobacteria_unclassified(100);p__Proteobacteria_unclassified(100);.27	4.84048	7.39949	1.12284	6.58999	4.39853e-11	1.79205e-09
k__Bacteria(100);p__Firmicutes(100);c__Clostridia(100);o__Clostridiales(100);f__Lachnospiraceae(100);g__Clostridium(100);g__Clostridium_unclassified(100);	28.134	7.42487	1.20886	6.14205	8.1464e-10	2.60479e-08
k__Bacteria(100);p__Firmicutes(100);c__Bacilli(100);o__Bacillales(100);f__Staphylococcaceae(100);g__Staphylococcus(100);g__Staphylococcus_unclassified(99);	4.11475	7.46121	1.46024	5.10956	3.22902e-07	5.78475e-06
k__Bacteria(100);k__Bacteria_unclassified(100);k__Bacteria_unclassified(100);k__Bacteria_unclassified(100);k__Bacteria_unclassified(100);k__Bacteria_unclassified(100);k__Bacteria_unclassified(100);.116	5.17416	7.54053	2.05166	3.67533	0.000237539	0.00170461
k__Bacteria(100);p__Firmicutes(100);p__Firmicutes_unclassified(100);p__Firmicutes_unclassified(100);p__Firmicutes_unclassified(100);p__Firmicutes_unclassified(100);p__Firmicutes_unclassified(100);.20	11.9198	7.91863	1.81149	4.37133	1.23491e-05	0.000136217
k__Bacteria(100);p__Bacteroidetes(100);c__Bacteroidia(100);o__Bacteroidales(100);f__Rikenellaceae(100);g__Rikenella(100);g__Rikenella_unclassified(100);	9.41025	7.99335	2.52898	3.16071	0.00157386	0.0080651
k__Bacteria(100);p__Verrucomicrobia(100);c__Opitutae(100);o__[Cerasicoccales](100);f__[Cerasicoccaceae](100);f__[Cerasicoccaceae]_unclassified(100);f__[Cerasicoccaceae]_unclassified(100);.3	5.79162	7.99987	2.19292	3.64804	0.000264248	0.00184389
k__Bacteria(100);p__Proteobacteria(100);c__Alphaproteobacteria(100);c__Alphaproteobacteria_unclassified(100);c__Alphaproteobacteria_unclassified(100);c__Alphaproteobacteria_unclassified(100);c__Alphaproteobacteria_unclassified(100);	8.72601	8.0002	1.84907	4.3266	1.51432e-05	0.0001597
k__Bacteria(100);p__Actinobacteria(100);c__Actinobacteria(100);o__Actinomycetales(100);f__Microbacteriaceae(100);g__Candidatus_Rhodoluna(99);g__Candidatus_Rhodoluna_unclassified(99);	6.94743	8.03652	2.4447	3.28733	0.00101143	0.00547084
k__Bacteria(100);p__Firmicutes(100);c__Clostridia(100);o__Clostridiales(100);f__Lachnospiraceae(100);f__Lachnospiraceae_unclassified(100);f__Lachnospiraceae_unclassified(100);.4	93.2465	8.03926	1.73557	4.63205	3.62065e-06	4.78835e-05
k__Bacteria(100);p__Firmicutes(100);c__Clostridia(100);o__Clostridiales(100);f__Ruminococcaceae(100);g__Ruminococcus(100);g__Ruminococcus_unclassified(100);.12	7.2133	8.04766	2.11245	3.80963	0.000139176	0.00107182
k__Bacteria(100);p__Bacteroidetes(100);c__Bacteroidia(100);o__Bacteroidales(100);f__Rikenellaceae(100);g__AF12(100);g__AF12_unclassified(100);	10.0847	8.10454	1.46861	5.5185	3.41907e-08	7.64298e-07
k__Bacteria(100);p__Bacteroidetes(100);p__Bacteroidetes_unclassified(100);p__Bacteroidetes_unclassified(100);p__Bacteroidetes_unclassified(100);p__Bacteroidetes_unclassified(100);p__Bacteroidetes_unclassified(100);.43	12.9448	8.14458	1.51978	5.35905	8.36592e-08	1.71807e-06
k__Bacteria(100);p__Firmicutes(100);c__Clostridia(100);o__Clostridiales(100);o__Clostridiales_unclassified(99);o__Clostridiales_unclassified(99);o__Clostridiales_unclassified(99);	98.9004	8.22833	0.718006	11.46	2.09557e-30	3.52894e-28
k__Bacteria(100);p__Firmicutes(100);c__Erysipelotrichi(100);o__Erysipelotrichales(100);f__Erysipelotrichaceae(100);g__Coprobacillus(100);s__cateniformis(100);	23.1845	8.35317	1.38729	6.0212	1.73132e-09	5.0268e-08
k__Bacteria(100);p__Firmicutes(100);c__Clostridia(100);o__Clostridiales(100);f__Ruminococcaceae(100);g__Butyricicoccus(100);s__pullicaecorum(100);	51.6221	8.38587	1.50385	5.57626	2.45741e-08	5.74762e-07
k__Bacteria(100);p__Firmicutes(100);c__Clostridia(100);o__Clostridiales(100);f__Ruminococcaceae(100);g__Ruminococcus(100);g__Ruminococcus_unclassified(100);.1	96.771	8.47966	1.17197	7.23542	4.6408e-13	2.44222e-11
k__Bacteria(100);p__Actinobacteria(100);c__Actinobacteria(100);o__Actinomycetales(100);f__ACK-M1(100);f__ACK-M1_unclassified(100);f__ACK-M1_unclassified(100);	8.21252	8.52052	2.39337	3.56005	0.000370781	0.00237519
k__Bacteria(100);p__Bacteroidetes(100);p__Bacteroidetes_unclassified(100);p__Bacteroidetes_unclassified(100);p__Bacteroidetes_unclassified(100);p__Bacteroidetes_unclassified(100);p__Bacteroidetes_unclassified(100);.33	13.6007	8.70469	1.9899	4.37444	1.21744e-05	0.00013488
k__Bacteria(100);p__Firmicutes(100);c__Clostridia(100);o__Clostridiales(100);f__Lachnospiraceae(100);f__Lachnospiraceae_unclassified(100);f__Lachnospiraceae_unclassified(100);.8	98.4812	8.72825	1.51782	5.75051	8.89771e-09	2.34121e-07
k__Bacteria(100);p__Bacteroidetes(100);c__Cytophagia(100);o__Cytophagales(100);f__Cytophagaceae(100);f__Cytophagaceae_unclassified(100);f__Cytophagaceae_unclassified(100);	10.1763	8.83036	2.64026	3.34451	0.000824286	0.00460652
k__Bacteria(100);p__Proteobacteria(100);c__Alphaproteobacteria(100);o__RF32(100);o__RF32_unclassified(100);o__RF32_unclassified(100);o__RF32_unclassified(100);.2	12.9582	9.17199	2.36257	3.8822	0.000103514	0.000835386
k__Bacteria(100);p__Firmicutes(100);c__Clostridia(100);o__Clostridiales(100);o__Clostridiales_unclassified(100);o__Clostridiales_unclassified(100);o__Clostridiales_unclassified(100);.12	15.4703	9.19231	1.75842	5.22761	1.71717e-07	3.26134e-06
k__Bacteria(100);p__Tenericutes(100);c__Mollicutes(100);o__RF39(100);o__RF39_unclassified(100);o__RF39_unclassified(100);o__RF39_unclassified(100);.1	16.7035	9.21179	1.30449	7.0616	1.64594e-12	8.15225e-11
k__Bacteria(100);p__Firmicutes(100);c__Clostridia(100);o__Clostridiales(100);f__Peptostreptococcaceae(100);f__Peptostreptococcaceae_unclassified(100);f__Peptostreptococcaceae_unclassified(100);.1	42.5893	9.24258	1.27366	7.25674	3.96535e-13	2.17749e-11
k__Bacteria(100);p__Spirochaetes(100);c__Spirochaetes(100);o__[Borreliales](100);f__[Borreliaceae](100);g__Spironema(100);g__Spironema_unclassified(100);	16.3709	9.26293	1.6151	5.73521	9.73891e-09	2.51025e-07
k__Bacteria(100);p__Bacteroidetes(100);c__Bacteroidia(100);o__Bacteroidales(100);f__Porphyromonadaceae(100);g__Dysgonomonas(100);g__Dysgonomonas_unclassified(100);.5	80.2836	9.614	1.51921	6.32828	2.47909e-10	9.07561e-09
k__Bacteria(100);k__Bacteria_unclassified(100);k__Bacteria_unclassified(100);k__Bacteria_unclassified(100);k__Bacteria_unclassified(100);k__Bacteria_unclassified(100);k__Bacteria_unclassified(100);.26	23.3556	9.71356	1.42451	6.8189	9.17379e-12	4.13804e-10
k__Bacteria(100);p__Spirochaetes(100);c__MVP-15(100);o__PL-11B10(100);o__PL-11B10_unclassified(100);o__PL-11B10_unclassified(100);o__PL-11B10_unclassified(100);	49.8175	9.98748	1.77595	5.62375	1.86857e-08	4.49526e-07
k__Bacteria(100);p__Firmicutes(100);c__Clostridia(100);o__Clostridiales(100);f__Veillonellaceae(100);g__Phascolarctobacterium(100);g__Phascolarctobacterium_unclassified(100);	63.7086	10.6542	1.51094	7.05139	1.77134e-12	8.60463e-11
k__Bacteria(100);p__Firmicutes(100);c__Clostridia(100);o__Clostridiales(100);f__Clostridiaceae(100);g__Clostridium(100);g__Clostridium_unclassified(100);	56.9737	10.7062	1.77087	6.04576	1.48709e-09	4.47189e-08
k__Bacteria(100);p__Firmicutes(100);c__Clostridia(100);o__Clostridiales(100);f__Peptostreptococcaceae(100);f__Peptostreptococcaceae_unclassified(100);f__Peptostreptococcaceae_unclassified(100);	81.0353	11.3141	1.32183	8.55938	1.13475e-17	8.18969e-16
k__Bacteria(100);p__GN02(100);c__BD1-5(100);c__BD1-5_unclassified(100);c__BD1-5_unclassified(100);c__BD1-5_unclassified(100);c__BD1-5_unclassified(100);.3	4.6302	23.1838	3.29898	7.02757	2.10165e-12	1.00166e-10
k__Bacteria(100);p__Firmicutes(100);c__Clostridia(100);o__Clostridiales(100);f__Lachnospiraceae(100);f__Lachnospiraceae_unclassified(100);f__Lachnospiraceae_unclassified(100);.26	9.34637	23.2867	2.34144	9.94549	2.63877e-23	3.02978e-21
k__Bacteria(100);p__Bacteroidetes(100);p__Bacteroidetes_unclassified(100);p__Bacteroidetes_unclassified(100);p__Bacteroidetes_unclassified(100);p__Bacteroidetes_unclassified(100);p__Bacteroidetes_unclassified(100);.42	12.5635	24.0814	1.95305	12.3302	6.23276e-35	1.21107e-32
k__Bacteria(100);p__Bacteroidetes(100);c__Bacteroidia(100);o__Bacteroidales(100);f__Porphyromonadaceae(100);g__Dysgonomonas(100);g__Dysgonomonas_unclassified(100);.7	69.0424	24.2406	1.61413	15.0177	5.6205e-51	2.0282e-48

## Sheet: Wild P. americana T0 v T14
	baseMean	log2FoldChange	lfcSE	stat	pvalue	padj
k__Bacteria(100);p__Bacteroidetes(100);c__Bacteroidia(100);o__Bacteroidales(100);o__Bacteroidales_unclassified(100);o__Bacteroidales_unclassified(100);o__Bacteroidales_unclassified(100);.27	11.3631	-32.7852	2.35497	-13.9217	4.67865e-44	2.60353e-41		Total	192
k__Bacteria(100);p__Bacteroidetes(100);p__Bacteroidetes_unclassified(100);p__Bacteroidetes_unclassified(100);p__Bacteroidetes_unclassified(100);p__Bacteroidetes_unclassified(100);p__Bacteroidetes_unclassified(100);.56	7.09974	-29.5896	4.76699	-6.20719	5.39411e-10	5.1244e-08		Increase	90
k__Bacteria(100);p__Bacteroidetes(100);c__Bacteroidia(100);o__Bacteroidales(100);f__Porphyromonadaceae(100);g__Dysgonomonas(100);g__Dysgonomonas_unclassified(100);.7	69.0424	-26.9243	1.64431	-16.3742	2.92131e-60	6.10553e-57		Decrease	102
k__Bacteria(100);p__Firmicutes(100);c__Erysipelotrichi(100);o__Erysipelotrichales(100);f__Erysipelotrichaceae(100);g__Clostridium(100);g__Clostridium_unclassified(100);.3	6.94843	-24.2068	2.95244	-8.19892	2.42566e-16	4.22469e-14
k__Bacteria(100);p__Firmicutes(100);c__Clostridia(100);o__Clostridiales(100);f__Clostridiaceae(100);g__Clostridium(100);g__Clostridium_unclassified(100);	56.9737	-21.5729	1.81257	-11.9019	1.15746e-32	4.83818e-30
k__Bacteria(100);k__Bacteria_unclassified(100);k__Bacteria_unclassified(100);k__Bacteria_unclassified(100);k__Bacteria_unclassified(100);k__Bacteria_unclassified(100);k__Bacteria_unclassified(100);.50	11.7988	-21.3275	5.35253	-3.98456	6.76049e-05	0.00185914
k__Bacteria(100);p__GN02(100);c__BD1-5(100);c__BD1-5_unclassified(100);c__BD1-5_unclassified(100);c__BD1-5_unclassified(100);c__BD1-5_unclassified(100);.3	4.6302	-20.7451	3.37843	-6.14044	8.22922e-10	7.47786e-08
k__Bacteria(100);p__Firmicutes(100);c__Clostridia(100);o__Clostridiales(100);f__Lachnospiraceae(100);f__Lachnospiraceae_unclassified(100);f__Lachnospiraceae_unclassified(100);.26	9.34637	-19.3372	2.421	-7.98727	1.3796e-15	2.05955e-13
k__Bacteria(100);p__Bacteroidetes(100);p__Bacteroidetes_unclassified(100);p__Bacteroidetes_unclassified(100);p__Bacteroidetes_unclassified(100);p__Bacteroidetes_unclassified(100);p__Bacteroidetes_unclassified(100);.42	12.5635	-15.4144	2.0844	-7.39514	1.41259e-13	1.96821e-11
k__Bacteria(100);p__Firmicutes(100);p__Firmicutes_unclassified(100);p__Firmicutes_unclassified(100);p__Firmicutes_unclassified(100);p__Firmicutes_unclassified(100);p__Firmicutes_unclassified(100);.37	8.13581	-8.79448	2.00035	-4.39648	1.1002e-05	0.000401182
k__Bacteria(100);p__Bacteroidetes(100);c__Bacteroidia(100);o__Bacteroidales(100);f__Porphyromonadaceae(100);f__Porphyromonadaceae_unclassified(100);f__Porphyromonadaceae_unclassified(100);.21	13.5951	-7.7136	1.68537	-4.57681	4.7213e-06	0.000209947
k__Bacteria(100);p__Firmicutes(100);c__Clostridia(100);o__Clostridiales(100);f__Ruminococcaceae(100);g__Ruminococcus(100);g__Ruminococcus_unclassified(100);.9	10.6077	-7.51047	1.4985	-5.01198	5.3873e-07	3.0431e-05
k__Bacteria(100);p__Firmicutes(100);c__Clostridia(100);o__Clostridiales(100);f__Veillonellaceae(100);g__Phascolarctobacterium(100);g__Phascolarctobacterium_unclassified(100);	63.7086	-7.5037	1.54179	-4.86686	1.13385e-06	6.07626e-05
k__Bacteria(100);p__Proteobacteria(100);c__Betaproteobacteria(100);o__Neisseriales(100);f__Neisseriaceae(100);f__Neisseriaceae_unclassified(100);f__Neisseriaceae_unclassified(100);	8.40198	-7.39849	2.27804	-3.24774	0.00116326	0.0181434
k__Bacteria(100);p__Firmicutes(100);c__Clostridia(100);o__Clostridiales(100);f__Peptostreptococcaceae(100);f__Peptostreptococcaceae_unclassified(100);f__Peptostreptococcaceae_unclassified(100);	81.0353	-7.33007	1.34803	-5.43761	5.40012e-08	4.0308e-06
k__Bacteria(100);p__Firmicutes(100);c__Clostridia(100);o__Clostridiales(100);f__Ruminococcaceae(100);g__Clostridium(100);s__methylpentosum(100);	44.8124	-7.10609	1.31376	-5.40897	6.33877e-08	4.56829e-06
k__Bacteria(100);p__Firmicutes(100);c__Clostridia(100);o__Clostridiales(100);f__Ruminococcaceae(100);f__Ruminococcaceae_unclassified(100);f__Ruminococcaceae_unclassified(100);.33	23.6633	-7.09532	1.06104	-6.68715	2.27557e-11	2.50312e-09
k__Bacteria(100);p__Firmicutes(100);c__Clostridia(100);o__Clostridiales(100);f__Lachnospiraceae(100);f__Lachnospiraceae_unclassified(100);f__Lachnospiraceae_unclassified(100);.31	8.35787	-6.94842	2.05645	-3.37885	0.000727893	0.0127318
k__Bacteria(100);p__Bacteroidetes(100);c__Bacteroidia(100);o__Bacteroidales(100);f__Porphyromonadaceae(100);g__Candidatus_Azobacteroides(100);g__Candidatus_Azobacteroides_unclassified(100);.31	9.32712	-6.93961	1.58198	-4.38666	1.15102e-05	0.000407735
k__Bacteria(100);p__Bacteroidetes(100);p__Bacteroidetes_unclassified(100);p__Bacteroidetes_unclassified(100);p__Bacteroidetes_unclassified(100);p__Bacteroidetes_unclassified(100);p__Bacteroidetes_unclassified(100);.39	10.3358	-6.87058	1.57807	-4.35379	1.33805e-05	0.000466089
k__Bacteria(100);p__Firmicutes(100);c__Clostridia(100);o__Clostridiales(100);o__Clostridiales_unclassified(100);o__Clostridiales_unclassified(100);o__Clostridiales_unclassified(100);.12	15.4703	-6.86327	1.79592	-3.82158	0.000132598	0.00329917
k__Bacteria(100);p__Deferribacteres(100);c__Deferribacteres(100);o__Deferribacterales(100);f__Deferribacteraceae(100);g__Mucispirillum(100);g__Mucispirillum_unclassified(100);	14.9243	-6.77377	1.25478	-5.39838	6.72469e-08	4.68487e-06
k__Bacteria(100);p__Bacteroidetes(100);c__Bacteroidia(100);o__Bacteroidales(100);o__Bacteroidales_unclassified(100);o__Bacteroidales_unclassified(100);o__Bacteroidales_unclassified(100);	468.77	-6.73959	1.25723	-5.36065	8.29242e-08	5.41599e-06
k__Bacteria(100);p__Bacteroidetes(100);c__Bacteroidia(100);o__Bacteroidales(100);f__Rikenellaceae(100);f__Rikenellaceae_unclassified(100);f__Rikenellaceae_unclassified(100);.42	7.40372	-6.69345	1.11467	-6.00487	1.91485e-09	1.66752e-07
k__Bacteria(100);p__Bacteroidetes(100);p__Bacteroidetes_unclassified(100);p__Bacteroidetes_unclassified(100);p__Bacteroidetes_unclassified(100);p__Bacteroidetes_unclassified(100);p__Bacteroidetes_unclassified(100);.43	12.9448	-6.65597	1.55127	-4.29067	1.78136e-05	0.000581724
k__Bacteria(100);p__Bacteroidetes(100);p__Bacteroidetes_unclassified(100);p__Bacteroidetes_unclassified(100);p__Bacteroidetes_unclassified(100);p__Bacteroidetes_unclassified(100);p__Bacteroidetes_unclassified(100);.6	291.163	-6.63401	1.37863	-4.81205	1.49392e-06	7.80571e-05
k__Bacteria(100);p__Firmicutes(100);c__Bacilli(100);o__Lactobacillales(100);f__Lactobacillaceae(100);g__Lactobacillus(100);s__plantarum(95);	2.54808	-6.432	2.15569	-2.98373	0.00284761	0.0369659
k__Bacteria(100);p__Firmicutes(100);c__Clostridia(100);o__Clostridiales(100);f__Ruminococcaceae(100);f__Ruminococcaceae_unclassified(100);f__Ruminococcaceae_unclassified(100);.87	6.17009	-6.31567	1.3489	-4.68207	2.83991e-06	0.000138033
k__Bacteria(100);p__Spirochaetes(100);c__MVP-15(100);o__PL-11B10(100);o__PL-11B10_unclassified(100);o__PL-11B10_unclassified(100);o__PL-11B10_unclassified(100);	49.8175	-6.20162	1.81595	-3.41509	0.000637617	0.0114881
k__Bacteria(100);p__Bacteroidetes(100);c__Bacteroidia(100);o__Bacteroidales(100);f__Porphyromonadaceae(100);f__Porphyromonadaceae_unclassified(100);f__Porphyromonadaceae_unclassified(100);.25	3.30326	-5.96729	1.63641	-3.64657	0.000265763	0.00573847
k__Bacteria(100);p__Bacteroidetes(100);c__Bacteroidia(100);o__Bacteroidales(100);f__Porphyromonadaceae(100);f__Porphyromonadaceae_unclassified(68);f__Porphyromonadaceae_unclassified(68);	11.8289	-5.76655	1.61481	-3.57103	0.000355583	0.00728597
k__Bacteria(100);p__Firmicutes(100);c__Clostridia(100);o__Clostridiales(100);f__Lachnospiraceae(100);f__Lachnospiraceae_unclassified(100);f__Lachnospiraceae_unclassified(100);.17	27.3507	-5.74095	1.00664	-5.70311	1.17642e-08	9.45664e-07
k__Bacteria(100);p__Firmicutes(100);c__Clostridia(100);o__Clostridiales(100);f__Eubacteriaceae(100);g__Pseudoramibacter_Eubacterium(100);g__Pseudoramibacter_Eubacterium_unclassified(100);	2.09478	-5.62357	1.3354	-4.21116	2.54067e-05	0.000780881
k__Bacteria(100);k__Bacteria_unclassified(100);k__Bacteria_unclassified(100);k__Bacteria_unclassified(100);k__Bacteria_unclassified(100);k__Bacteria_unclassified(100);k__Bacteria_unclassified(100);.73	6.90377	-5.62062	1.17381	-4.78835	1.68156e-06	8.57184e-05
k__Bacteria(100);p__Proteobacteria(100);c__Gammaproteobacteria(100);o__Pseudomonadales(100);f__Pseudomonadaceae(100);g__Pseudomonas(100);s__viridiflava(100);	3.23599	-5.43528	1.8951	-2.86807	0.00412989	0.0469102
k__Bacteria(100);p__Proteobacteria(100);c__Betaproteobacteria(100);o__Burkholderiales(100);f__Alcaligenaceae(100);g__Achromobacter(100);g__Achromobacter_unclassified(100);	1.4361	-5.42818	1.28473	-4.22515	2.38783e-05	0.000744861
k__Bacteria(100);p__Firmicutes(100);c__Clostridia(100);o__Clostridiales(100);f__Ruminococcaceae(99);f__Ruminococcaceae_unclassified(99);f__Ruminococcaceae_unclassified(99);.2	3.28149	-5.42654	1.83388	-2.95904	0.00308595	0.0388532
k__Bacteria(100);p__Firmicutes(100);p__Firmicutes_unclassified(100);p__Firmicutes_unclassified(100);p__Firmicutes_unclassified(100);p__Firmicutes_unclassified(100);p__Firmicutes_unclassified(100);.20	11.9198	-5.34538	1.85483	-2.88187	0.00395325	0.0459016
k__Bacteria(100);p__Firmicutes(100);c__Clostridia(100);o__Clostridiales(100);f__Lachnospiraceae(100);g__Clostridium(100);g__Clostridium_unclassified(100);.1	19.7834	-5.32567	1.6246	-3.27815	0.00104491	0.0170614
k__Bacteria(100);p__Bacteroidetes(100);c__Bacteroidia(100);o__Bacteroidales(100);o__Bacteroidales_unclassified(100);o__Bacteroidales_unclassified(100);o__Bacteroidales_unclassified(100);.15	27.9574	-5.23584	1.49413	-3.50428	0.000457838	0.00883581
k__Bacteria(100);p__Tenericutes(100);c__Mollicutes(100);o__Mycoplasmatales(100);f__Mycoplasmataceae(100);g__Mycoplasma(100);s__penetrans(97);	7.10918	-5.18946	1.27445	-4.07193	4.66247e-05	0.00131683
k__Bacteria(100);p__Firmicutes(100);c__Clostridia(100);o__Clostridiales(100);o__Clostridiales_unclassified(99);o__Clostridiales_unclassified(99);o__Clostridiales_unclassified(99);	98.9004	-5.12844	0.733234	-6.99427	2.66637e-12	3.48295e-10
k__Bacteria(100);p__Bacteroidetes(100);c__Bacteroidia(100);o__Bacteroidales(100);f__Rikenellaceae(100);f__Rikenellaceae_unclassified(100);f__Rikenellaceae_unclassified(100);.16	21.9227	-5.06921	1.45382	-3.48683	0.000488783	0.00920322
k__Bacteria(100);p__Bacteroidetes(100);c__Bacteroidia(100);o__Bacteroidales(100);f__Porphyromonadaceae(100);g__Dysgonomonas(100);g__Dysgonomonas_unclassified(100);.26	11.0424	-4.92651	1.42076	-3.46753	0.000525273	0.00980198
k__Bacteria(100);p__Firmicutes(100);c__Clostridia(100);o__Clostridiales(100);o__Clostridiales_unclassified(100);o__Clostridiales_unclassified(100);o__Clostridiales_unclassified(100);.23	13.2606	-4.8955	1.35988	-3.59996	0.000318267	0.00665179
k__Bacteria(100);k__Bacteria_unclassified(100);k__Bacteria_unclassified(100);k__Bacteria_unclassified(100);k__Bacteria_unclassified(100);k__Bacteria_unclassified(100);k__Bacteria_unclassified(100);.35	15.5045	-4.88205	1.24467	-3.92236	8.76866e-05	0.00234955
k__Bacteria(100);p__Bacteroidetes(100);c__Bacteroidia(100);o__Bacteroidales(100);f__Rikenellaceae(100);f__Rikenellaceae_unclassified(100);f__Rikenellaceae_unclassified(100);.33	6.70246	-4.78302	1.65322	-2.89315	0.00381399	0.0452911
k__Bacteria(100);p__Firmicutes(100);c__Clostridia(100);o__Clostridiales(100);f__Lachnospiraceae(100);f__Lachnospiraceae_unclassified(100);f__Lachnospiraceae_unclassified(100);.20	18.2174	-4.64251	1.63053	-2.84724	0.00441005	0.0482229
k__Bacteria(100);p__Bacteroidetes(100);c__Bacteroidia(100);o__Bacteroidales(100);f__Rikenellaceae(100);f__Rikenellaceae_unclassified(100);f__Rikenellaceae_unclassified(100);.10	40.6829	-4.49597	1.33109	-3.37768	0.000731012	0.0127318
k__Bacteria(100);k__Bacteria_unclassified(100);k__Bacteria_unclassified(100);k__Bacteria_unclassified(100);k__Bacteria_unclassified(100);k__Bacteria_unclassified(100);k__Bacteria_unclassified(100);	172.432	-4.48727	1.54442	-2.90548	0.00366685	0.0442989
k__Bacteria(100);p__Firmicutes(100);c__Clostridia(100);o__Clostridiales(100);f__Ruminococcaceae(100);g__Ruminococcus(100);g__Ruminococcus_unclassified(100);.7	14.1283	-4.44483	0.994355	-4.47007	7.8195e-06	0.000308354
k__Bacteria(100);p__Bacteroidetes(100);p__Bacteroidetes_unclassified(100);p__Bacteroidetes_unclassified(100);p__Bacteroidetes_unclassified(100);p__Bacteroidetes_unclassified(100);p__Bacteroidetes_unclassified(100);.7	222.835	-4.42317	1.39727	-3.16557	0.00154778	0.0229423
k__Bacteria(100);k__Bacteria_unclassified(100);k__Bacteria_unclassified(100);k__Bacteria_unclassified(100);k__Bacteria_unclassified(100);k__Bacteria_unclassified(100);k__Bacteria_unclassified(100);.64	6.31892	-4.23261	1.3309	-3.18025	0.00147148	0.0221252
k__Bacteria(100);p__Firmicutes(100);c__Erysipelotrichi(100);o__Erysipelotrichales(100);f__Erysipelotrichaceae(100);g__Coprobacillus(100);s__cateniformis(100);	23.1845	-4.22879	1.42656	-2.96433	0.00303343	0.0386578
k__Bacteria(100);p__Firmicutes(100);c__Clostridia(100);o__Clostridiales(100);f__Ruminococcaceae(100);f__Ruminococcaceae_unclassified(100);f__Ruminococcaceae_unclassified(100);.8	61.3393	-4.22584	1.32601	-3.18688	0.00143816	0.0217808
k__Bacteria(100);p__Proteobacteria(100);c__Deltaproteobacteria(100);o__Desulfovibrionales(100);f__Desulfovibrionaceae(100);g__Desulfovibrio(100);g__Desulfovibrio_unclassified(100);.17	6.71624	-4.20074	1.17879	-3.56359	0.00036581	0.00742276
k__Bacteria(100);k__Bacteria_unclassified(100);k__Bacteria_unclassified(100);k__Bacteria_unclassified(100);k__Bacteria_unclassified(100);k__Bacteria_unclassified(100);k__Bacteria_unclassified(100);.31	22.621	-4.09889	1.39253	-2.94348	0.00324543	0.0406165
k__Bacteria(100);p__Firmicutes(100);c__Clostridia(100);o__Clostridiales(100);o__Clostridiales_unclassified(100);o__Clostridiales_unclassified(100);o__Clostridiales_unclassified(100);.57	1.90913	-4.02721	1.0818	-3.72268	0.000197118	0.00457751
k__Bacteria(100);p__Firmicutes(100);c__Clostridia(100);o__Clostridiales(100);f__Lachnospiraceae(100);f__Lachnospiraceae_unclassified(100);f__Lachnospiraceae_unclassified(100);.15	39.938	-4.02689	1.14102	-3.5292	0.000416814	0.00821832
k__Bacteria(100);p__Firmicutes(100);c__Clostridia(100);o__Clostridiales(100);f__Ruminococcaceae(100);f__Ruminococcaceae_unclassified(100);f__Ruminococcaceae_unclassified(100);.49	9.15035	-3.9938	1.2713	-3.14151	0.00168081	0.0242268
k__Bacteria(100);p__Firmicutes(100);c__Clostridia(100);o__Clostridiales(99);f__Ruminococcaceae(99);f__Ruminococcaceae_unclassified(99);f__Ruminococcaceae_unclassified(99);	2.16135	-3.98502	0.862617	-4.61969	3.8431e-06	0.00017461
k__Bacteria(100);p__Bacteroidetes(100);c__Bacteroidia(100);o__Bacteroidales(100);o__Bacteroidales_unclassified(100);o__Bacteroidales_unclassified(100);o__Bacteroidales_unclassified(100);.5	254.336	-3.96731	0.950742	-4.17285	3.00812e-05	0.000885488
k__Bacteria(100);k__Bacteria_unclassified(100);k__Bacteria_unclassified(100);k__Bacteria_unclassified(100);k__Bacteria_unclassified(100);k__Bacteria_unclassified(100);k__Bacteria_unclassified(100);.97	3.4393	-3.95874	1.15846	-3.41724	0.000632592	0.0114881
k__Bacteria(100);p__Proteobacteria(100);c__Deltaproteobacteria(100);c__Deltaproteobacteria_unclassified(100);c__Deltaproteobacteria_unclassified(100);c__Deltaproteobacteria_unclassified(100);c__Deltaproteobacteria_unclassified(100);.3	13.2924	-3.89518	1.08678	-3.58413	0.000338202	0.00699845
k__Bacteria(100);p__Synergistetes(100);c__Synergistia(100);o__Synergistales(100);f__Synergistaceae(100);g__Candidatus_Tammella(100);g__Candidatus_Tammella_unclassified(100);.5	13.02	-3.87229	0.896384	-4.3199	1.56102e-05	0.000526215
k__Bacteria(100);p__Bacteroidetes(100);c__Bacteroidia(100);o__Bacteroidales(100);f__Porphyromonadaceae(100);g__Paludibacter(100);g__Paludibacter_unclassified(100);.14	15.4414	-3.78707	1.2683	-2.98594	0.00282708	0.0369287
k__Bacteria(100);p__Firmicutes(100);c__Clostridia(100);o__Clostridiales(53);o__Clostridiales_unclassified(53);o__Clostridiales_unclassified(53);o__Clostridiales_unclassified(53);	1.53954	-3.71936	1.19158	-3.12136	0.00180019	0.025251
k__Bacteria(100);k__Bacteria_unclassified(100);k__Bacteria_unclassified(100);k__Bacteria_unclassified(100);k__Bacteria_unclassified(100);k__Bacteria_unclassified(100);k__Bacteria_unclassified(100);.44	10.4853	-3.70182	1.03998	-3.55951	0.000371554	0.00746682
k__Bacteria(100);p__Firmicutes(100);p__Firmicutes_unclassified(100);p__Firmicutes_unclassified(100);p__Firmicutes_unclassified(100);p__Firmicutes_unclassified(100);p__Firmicutes_unclassified(100);	245.329	-3.68415	0.669444	-5.50329	3.72767e-08	2.88549e-06
k__Bacteria(100);p__Firmicutes(100);c__Clostridia(100);o__Clostridiales(100);f__Ruminococcaceae(100);g__Ruminococcus(100);g__Ruminococcus_unclassified(100);.6	14.3633	-3.65816	0.993527	-3.682	0.000231415	0.00525714
k__Bacteria(100);p__Bacteroidetes(100);c__Bacteroidia(100);o__Bacteroidales(100);o__Bacteroidales_unclassified(100);o__Bacteroidales_unclassified(100);o__Bacteroidales_unclassified(100);.8	98.0083	-3.65404	1.12351	-3.25233	0.00114463	0.017987
k__Bacteria(100);k__Bacteria_unclassified(100);k__Bacteria_unclassified(100);k__Bacteria_unclassified(100);k__Bacteria_unclassified(100);k__Bacteria_unclassified(100);k__Bacteria_unclassified(100);.12	33.3724	-3.54435	0.671922	-5.27494	1.32796e-07	8.37891e-06
k__Bacteria(100);p__Bacteroidetes(100);c__Bacteroidia(100);o__Bacteroidales(100);f__Porphyromonadaceae(100);g__Dysgonomonas(100);g__Dysgonomonas_unclassified(100);.21	10.5347	-3.44711	1.20123	-2.86964	0.00410944	0.0469102
k__Bacteria(100);p__Bacteroidetes(100);p__Bacteroidetes_unclassified(100);p__Bacteroidetes_unclassified(100);p__Bacteroidetes_unclassified(100);p__Bacteroidetes_unclassified(100);p__Bacteroidetes_unclassified(100);.10	163.094	-3.34257	1.16794	-2.86193	0.00421067	0.0470604
k__Bacteria(100);p__Verrucomicrobia(100);c__Verruco-5(100);o__LD1-PB3(100);o__LD1-PB3_unclassified(100);o__LD1-PB3_unclassified(100);o__LD1-PB3_unclassified(100);	43.7019	-3.2733	0.860501	-3.80394	0.000142411	0.00350164
k__Bacteria(100);p__Lentisphaerae(100);c__[Lentisphaeria](100);o__Victivallales(100);f__Victivallaceae(100);f__Victivallaceae_unclassified(100);f__Victivallaceae_unclassified(100);.1	19.1987	-3.19013	0.60532	-5.27016	1.36308e-07	8.37891e-06
k__Bacteria(100);p__Bacteroidetes(100);c__Bacteroidia(100);o__Bacteroidales(100);f__Rikenellaceae(100);f__Rikenellaceae_unclassified(100);f__Rikenellaceae_unclassified(100);.53	4.74335	-3.17268	1.10368	-2.87464	0.00404493	0.0466646
k__Bacteria(100);p__Firmicutes(100);c__Clostridia(100);o__Clostridiales(100);f__Ruminococcaceae(100);f__Ruminococcaceae_unclassified(100);f__Ruminococcaceae_unclassified(100);.35	21.9987	-3.01391	0.985118	-3.05944	0.0022175	0.0304906
k__Bacteria(100);p__Bacteroidetes(100);c__Bacteroidia(100);o__Bacteroidales(100);f__Porphyromonadaceae(100);g__Tannerella(100);g__Tannerella_unclassified(100);.1	81.1551	-2.78826	0.719781	-3.87376	0.000107169	0.00275494
k__Bacteria(100);p__Proteobacteria(100);c__Deltaproteobacteria(100);o__Desulfovibrionales(100);f__Desulfovibrionaceae(100);f__Desulfovibrionaceae_unclassified(65);f__Desulfovibrionaceae_unclassified(65);	65.2812	-2.77697	0.91591	-3.03193	0.00242997	0.0327654
k__Bacteria(100);p__Firmicutes(100);c__Clostridia(100);o__Clostridiales(100);f__Lachnospiraceae(100);f__Lachnospiraceae_unclassified(100);f__Lachnospiraceae_unclassified(100);.13	44.4473	-2.69959	0.928893	-2.90624	0.00365799	0.0442989
k__Bacteria(100);p__Firmicutes(100);c__Clostridia(100);o__Clostridiales(100);f__Ruminococcaceae(100);f__Ruminococcaceae_unclassified(70);f__Ruminococcaceae_unclassified(70);	2.19377	-2.69556	0.834136	-3.23156	0.00123118	0.0189203
k__Bacteria(100);k__Bacteria_unclassified(100);k__Bacteria_unclassified(100);k__Bacteria_unclassified(100);k__Bacteria_unclassified(100);k__Bacteria_unclassified(100);k__Bacteria_unclassified(100);.8	41.5997	-2.69024	0.612266	-4.3939	1.11333e-05	0.000401182
k__Bacteria(100);p__Firmicutes(100);c__Clostridia(100);o__Clostridiales(62);o__Clostridiales_unclassified(62);o__Clostridiales_unclassified(62);o__Clostridiales_unclassified(62);	9.76655	-2.60502	0.903082	-2.88458	0.00391932	0.0457619
k__Bacteria(100);p__Firmicutes(100);c__Clostridia(100);o__Clostridiales(100);f__Ruminococcaceae(100);f__Ruminococcaceae_unclassified(100);f__Ruminococcaceae_unclassified(100);.40	13.9666	-2.57378	0.582577	-4.41792	9.96569e-06	0.000371934
k__Bacteria(100);p__Firmicutes(100);p__Firmicutes_unclassified(100);p__Firmicutes_unclassified(100);p__Firmicutes_unclassified(100);p__Firmicutes_unclassified(100);p__Firmicutes_unclassified(100);.6	47.0798	-2.5385	0.857453	-2.96051	0.00307126	0.0388532
k__Bacteria(100);p__Verrucomicrobia(100);c__Verrucomicrobiae(100);o__Verrucomicrobiales(100);f__Verrucomicrobiaceae(100);f__Verrucomicrobiaceae_unclassified(100);f__Verrucomicrobiaceae_unclassified(100);	89.2384	-2.49812	0.713227	-3.50256	0.000460815	0.00883581
k__Bacteria(100);p__Firmicutes(100);c__Clostridia(100);o__Clostridiales(100);f__Ruminococcaceae(100);f__Ruminococcaceae_unclassified(100);f__Ruminococcaceae_unclassified(100);.55	7.58584	-2.42895	0.514026	-4.72533	2.29736e-06	0.000114321
k__Bacteria(100);p__Proteobacteria(100);c__Deltaproteobacteria(100);o__Desulfovibrionales(100);f__Desulfovibrionaceae(100);g__Desulfovibrio(100);g__Desulfovibrio_unclassified(100);.2	42.8663	-2.42411	0.742498	-3.2648	0.00109543	0.0176111
k__Bacteria(100);p__Firmicutes(100);c__Clostridia(100);o__Clostridiales(100);o__Clostridiales_unclassified(100);o__Clostridiales_unclassified(100);o__Clostridiales_unclassified(100);.11	19.4957	-2.33181	0.750728	-3.10607	0.0018959	0.0264162
k__Bacteria(100);p__Firmicutes(100);c__Clostridia(100);o__Clostridiales(100);f__Ruminococcaceae(100);f__Ruminococcaceae_unclassified(100);f__Ruminococcaceae_unclassified(100);.6	70.7884	-2.28647	0.545046	-4.19501	2.7286e-05	0.000814682
k__Bacteria(100);p__Firmicutes(100);c__Clostridia(100);o__Clostridiales(100);f__Ruminococcaceae(100);f__Ruminococcaceae_unclassified(100);f__Ruminococcaceae_unclassified(100);.38	15.2209	-2.2861	0.541011	-4.2256	2.38303e-05	0.000744861
k__Bacteria(100);p__Firmicutes(100);c__Clostridia(100);o__Clostridiales(100);o__Clostridiales_unclassified(100);o__Clostridiales_unclassified(100);o__Clostridiales_unclassified(100);.5	37.7176	-2.0888	0.679948	-3.072	0.00212631	0.0294304
k__Bacteria(100);p__Bacteroidetes(100);c__Bacteroidia(100);o__Bacteroidales(100);o__Bacteroidales_unclassified(100);o__Bacteroidales_unclassified(100);o__Bacteroidales_unclassified(100);.7	189.119	-2.05968	0.692452	-2.97447	0.00293498	0.0376326
k__Bacteria(100);p__Synergistetes(100);c__Synergistia(100);o__Synergistales(100);f__Dethiosulfovibrionaceae(100);g__TG5(100);g__TG5_unclassified(100);	61.9059	-2.03555	0.405416	-5.02089	5.14325e-07	2.98594e-05
k__Bacteria(100);p__Firmicutes(100);c__Clostridia(100);o__Clostridiales(100);f__Lachnospiraceae(100);f__Lachnospiraceae_unclassified(94);f__Lachnospiraceae_unclassified(94);	44.1158	-2.03097	0.538292	-3.77298	0.000161308	0.0038751
k__Bacteria(100);p__Proteobacteria(100);c__Deltaproteobacteria(100);o__Desulfovibrionales(100);f__Desulfovibrionaceae(100);g__Desulfovibrio(100);g__Desulfovibrio_unclassified(100);.6	35.9105	-1.92669	0.635111	-3.03363	0.00241632	0.0327654
k__Bacteria(100);p__Firmicutes(100);c__Clostridia(100);o__Clostridiales(100);f__Ruminococcaceae(100);f__Ruminococcaceae_unclassified(100);f__Ruminococcaceae_unclassified(100);.11	44.9518	-1.8216	0.634	-2.87318	0.00406361	0.0466646
k__Bacteria(100);p__Firmicutes(100);c__Clostridia(100);o__Clostridiales(100);f__Ruminococcaceae(99);f__Ruminococcaceae_unclassified(99);f__Ruminococcaceae_unclassified(99);.1	15.7902	-1.60679	0.552012	-2.91079	0.00360516	0.0442989
k__Bacteria(100);p__Firmicutes(100);c__Clostridia(100);o__Clostridiales(100);f__Christensenellaceae(100);f__Christensenellaceae_unclassified(100);f__Christensenellaceae_unclassified(100);.1	38.987	-1.43856	0.434692	-3.30938	0.000935022	0.0156336
k__Bacteria(100);p__Bacteroidetes(100);c__Bacteroidia(100);o__Bacteroidales(100);f__Rikenellaceae(100);f__Rikenellaceae_unclassified(100);f__Rikenellaceae_unclassified(100);.1	207.771	-1.43126	0.500039	-2.86229	0.00420596	0.0470604
k__Bacteria(100);p__Synergistetes(100);c__Synergistia(100);o__Synergistales(100);f__Synergistaceae(100);g__Candidatus_Tammella(100);g__Candidatus_Tammella_unclassified(100);	117.538	-1.33419	0.354767	-3.76074	0.000169413	0.00402355
k__Bacteria(100);p__Proteobacteria(100);c__Deltaproteobacteria(100);o__Desulfobacterales(100);f__Desulfobacteraceae(100);f__Desulfobacteraceae_unclassified(100);f__Desulfobacteraceae_unclassified(100);.1	106.857	1.15615	0.354964	3.25708	0.00112563	0.0178225
k__Bacteria(100);p__Verrucomicrobia(100);c__Opitutae(100);o__Opitutales(100);f__Opitutaceae(100);g__Opitutus(100);g__Opitutus_unclassified(100);	31.8485	1.22963	0.425335	2.89098	0.00384043	0.0453474
k__Bacteria(100);p__Planctomycetes(100);c__vadinHA49(100);o__PeHg47(100);o__PeHg47_unclassified(100);o__PeHg47_unclassified(100);o__PeHg47_unclassified(100);.1	82.4853	1.45896	0.511099	2.85456	0.00430967	0.0479107
k__Bacteria(100);p__Planctomycetes(100);c__vadinHA49(100);o__PeHg47(100);o__PeHg47_unclassified(100);o__PeHg47_unclassified(100);o__PeHg47_unclassified(100);	265.119	1.66294	0.367436	4.52579	6.01696e-06	0.000251509
k__Bacteria(100);p__Firmicutes(100);c__Clostridia(100);o__Clostridiales(100);f__Christensenellaceae(70);g__Christensenella(67);g__Christensenella_unclassified(67);	10.6476	1.86742	0.498174	3.74853	0.000177874	0.00417705
k__Bacteria(100);p__Firmicutes(100);c__Clostridia(100);o__Clostridiales(100);f__Ruminococcaceae(100);f__Ruminococcaceae_unclassified(100);f__Ruminococcaceae_unclassified(100);.95	3.63035	1.96278	0.60979	3.21879	0.00128735	0.0196391
k__Bacteria(100);p__Planctomycetes(100);c__vadinHA49(100);o__PeHg47(100);o__PeHg47_unclassified(100);o__PeHg47_unclassified(100);o__PeHg47_unclassified(100);.8	8.56399	2.41618	0.732467	3.29869	0.000971382	0.0161126
k__Bacteria(100);p__Firmicutes(100);c__Clostridia(100);o__Clostridiales(100);f__Lachnospiraceae(100);f__Lachnospiraceae_unclassified(100);f__Lachnospiraceae_unclassified(100);.16	30.1562	2.48131	0.743339	3.33805	0.000843672	0.0142199
k__Bacteria(100);p__Bacteroidetes(100);c__Bacteroidia(100);o__Bacteroidales(100);f__Rikenellaceae(100);f__Rikenellaceae_unclassified(100);f__Rikenellaceae_unclassified(100);.6	97.8836	2.53	0.557306	4.5397	5.63355e-06	0.000240288
k__Bacteria(100);k__Bacteria_unclassified(100);k__Bacteria_unclassified(100);k__Bacteria_unclassified(100);k__Bacteria_unclassified(100);k__Bacteria_unclassified(100);k__Bacteria_unclassified(100);.211	1.30776	2.55216	0.883488	2.88873	0.00386803	0.0454168
k__Bacteria(100);p__Bacteroidetes(100);c__Bacteroidia(100);o__Bacteroidales(100);f__Porphyromonadaceae(100);g__Tannerella(100);g__Tannerella_unclassified(100);.2	49.2917	2.61751	0.678952	3.85522	0.000115627	0.00291158
k__Bacteria(100);p__Bacteroidetes(100);c__Bacteroidia(100);o__Bacteroidales(100);o__Bacteroidales_unclassified(100);o__Bacteroidales_unclassified(100);o__Bacteroidales_unclassified(100);.22	23.8624	2.64068	0.877425	3.00958	0.00261612	0.034388
k__Bacteria(100);p__Firmicutes(100);c__Clostridia(100);o__Clostridiales(100);f__Ruminococcaceae(100);g__Ruminococcus(100);g__Ruminococcus_unclassified(100);.3	48.0348	2.65536	0.81844	3.24442	0.00117689	0.01822
k__Bacteria(100);p__Firmicutes(100);c__Clostridia(100);o__Clostridiales(100);f__Ruminococcaceae(100);f__Ruminococcaceae_unclassified(100);f__Ruminococcaceae_unclassified(100);.72	4.95064	2.74914	0.691256	3.97702	6.97843e-05	0.00189414
k__Bacteria(100);p__Proteobacteria(100);p__Proteobacteria_unclassified(100);p__Proteobacteria_unclassified(100);p__Proteobacteria_unclassified(100);p__Proteobacteria_unclassified(100);p__Proteobacteria_unclassified(100);.19	7.28998	2.75285	0.967338	2.8458	0.00443004	0.0482229
k__Bacteria(100);p__Firmicutes(100);p__Firmicutes_unclassified(100);p__Firmicutes_unclassified(100);p__Firmicutes_unclassified(100);p__Firmicutes_unclassified(100);p__Firmicutes_unclassified(100);.19	11.7216	2.76263	0.970451	2.84675	0.00441675	0.0482229
k__Bacteria(100);p__Bacteroidetes(100);c__Bacteroidia(100);o__Bacteroidales(100);f__Rikenellaceae(100);f__Rikenellaceae_unclassified(100);f__Rikenellaceae_unclassified(100);.14	32.1795	2.78197	0.813267	3.42073	0.000624526	0.0114496
k__Bacteria(100);p__Bacteroidetes(100);c__Bacteroidia(100);o__Bacteroidales(100);f__Porphyromonadaceae(100);g__Paludibacter(100);g__Paludibacter_unclassified(100);.2	46.169	2.7892	0.890846	3.13096	0.00174239	0.0246053
k__Bacteria(100);p__Firmicutes(100);c__Clostridia(100);o__Clostridiales(100);f__Ruminococcaceae(100);f__Ruminococcaceae_unclassified(100);f__Ruminococcaceae_unclassified(100);.154	1.31773	2.79763	0.882673	3.1695	0.001527	0.022796
k__Bacteria(100);p__Firmicutes(100);c__Clostridia(100);c__Clostridia_unclassified(100);c__Clostridia_unclassified(100);c__Clostridia_unclassified(100);c__Clostridia_unclassified(100);.2	3.73485	2.80198	0.834931	3.35595	0.000790941	0.0136617
k__Bacteria(100);p__Planctomycetes(100);c__Planctomycetia(100);o__Pirellulales(100);f__Pirellulaceae(100);f__Pirellulaceae_unclassified(100);f__Pirellulaceae_unclassified(100);.4	18.8255	2.83224	0.68019	4.16389	3.12866e-05	0.000908182
k__Bacteria(100);p__Proteobacteria(100);c__Deltaproteobacteria(100);o__Desulfovibrionales(100);f__Desulfovibrionaceae(100);g__Desulfovibrio(100);s__cuneatus(65);	19.5321	2.83909	0.632035	4.49198	7.05642e-06	0.000289175
k__Bacteria(100);p__Proteobacteria(100);c__Deltaproteobacteria(100);o__Spirobacillales(100);o__Spirobacillales_unclassified(100);o__Spirobacillales_unclassified(100);o__Spirobacillales_unclassified(100);	2.97895	2.87947	0.956167	3.01147	0.00259983	0.034388
k__Bacteria(100);p__Firmicutes(100);c__Clostridia(100);o__Clostridiales(100);f__Ruminococcaceae(100);g__Papillibacter(96);s__cinnamivorans(96);	1.10244	2.96053	1.03864	2.85039	0.00436655	0.0482229
k__Bacteria(100);p__Firmicutes(100);c__Clostridia(100);c__Clostridia_unclassified(100);c__Clostridia_unclassified(100);c__Clostridia_unclassified(100);c__Clostridia_unclassified(100);.4	2.55087	3.04005	0.685729	4.43332	9.27942e-06	0.000352618
k__Bacteria(100);k__Bacteria_unclassified(100);k__Bacteria_unclassified(100);k__Bacteria_unclassified(100);k__Bacteria_unclassified(100);k__Bacteria_unclassified(100);k__Bacteria_unclassified(100);.137	2.80278	3.22828	0.980888	3.29118	0.00099767	0.0164183
k__Bacteria(100);p__Bacteroidetes(100);c__Bacteroidia(100);o__Bacteroidales(100);f__Rikenellaceae(100);f__Rikenellaceae_unclassified(100);f__Rikenellaceae_unclassified(100);.9	40.7718	3.31123	0.874434	3.78671	0.000152654	0.00370985
k__Bacteria(100);p__Bacteroidetes(100);c__Bacteroidia(100);o__Bacteroidales(100);f__Rikenellaceae(100);f__Rikenellaceae_unclassified(100);f__Rikenellaceae_unclassified(100);.25	14.1417	3.54622	0.708867	5.00266	5.65432e-07	3.10987e-05
k__Bacteria(100);p__Bacteroidetes(100);p__Bacteroidetes_unclassified(100);p__Bacteroidetes_unclassified(100);p__Bacteroidetes_unclassified(100);p__Bacteroidetes_unclassified(100);p__Bacteroidetes_unclassified(100);.92	1.49373	3.65904	0.938744	3.8978	9.70694e-05	0.00256804
k__Bacteria(100);p__GN02(100);c__BD1-5(100);c__BD1-5_unclassified(100);c__BD1-5_unclassified(100);c__BD1-5_unclassified(100);c__BD1-5_unclassified(100);.7	5.31235	3.68189	1.25738	2.92822	0.00340908	0.0424106
k__Bacteria(100);p__Tenericutes(100);c__Mollicutes(100);o__RF39(100);o__RF39_unclassified(100);o__RF39_unclassified(100);o__RF39_unclassified(100);.27	1.16959	3.6919	1.28838	2.86553	0.00416313	0.0470322
k__Bacteria(100);p__Proteobacteria(100);c__Deltaproteobacteria(100);c__Deltaproteobacteria_unclassified(100);c__Deltaproteobacteria_unclassified(100);c__Deltaproteobacteria_unclassified(100);c__Deltaproteobacteria_unclassified(100);.2	9.44478	3.89644	1.34102	2.90558	0.00366573	0.0442989
k__Bacteria(100);p__Tenericutes(100);c__Mollicutes(100);o__RF39(100);o__RF39_unclassified(100);o__RF39_unclassified(100);o__RF39_unclassified(100);.2	10.4384	3.90681	1.29017	3.02813	0.0024607	0.0329671
k__Bacteria(100);p__Actinobacteria(100);c__Actinobacteria(100);o__Actinomycetales(100);f__Promicromonosporaceae(59);f__Promicromonosporaceae_unclassified(59);f__Promicromonosporaceae_unclassified(59);	1.77828	3.99791	1.3778	2.90166	0.00371191	0.0445856
k__Bacteria(100);p__Firmicutes(100);c__Clostridia(100);o__Clostridiales(100);o__Clostridiales_unclassified(100);o__Clostridiales_unclassified(100);o__Clostridiales_unclassified(100);.64	1.6743	4.03935	0.985494	4.09881	4.15286e-05	0.00118897
k__Bacteria(100);p__Bacteroidetes(100);c__Bacteroidia(100);o__Bacteroidales(100);f__Porphyromonadaceae(100);g__Paludibacter(100);g__Paludibacter_unclassified(100);.3	37.4827	4.11257	1.21482	3.38533	0.000710924	0.0125918
k__Bacteria(100);p__Firmicutes(100);p__Firmicutes_unclassified(100);p__Firmicutes_unclassified(100);p__Firmicutes_unclassified(100);p__Firmicutes_unclassified(100);p__Firmicutes_unclassified(100);.25	8.87128	4.13915	1.13988	3.63121	0.000282095	0.0060161
k__Bacteria(100);p__Proteobacteria(100);p__Proteobacteria_unclassified(100);p__Proteobacteria_unclassified(100);p__Proteobacteria_unclassified(100);p__Proteobacteria_unclassified(100);p__Proteobacteria_unclassified(100);.14	10.4533	4.30689	0.671374	6.41505	1.4078e-10	1.47115e-08
k__Bacteria(100);p__Actinobacteria(100);c__Actinobacteria(100);o__Actinomycetales(100);f__Mycobacteriaceae(100);g__Mycobacterium(100);g__Mycobacterium_unclassified(56);	0.991702	4.41019	1.4037	3.14184	0.00167889	0.0242268
k__Bacteria(100);p__Firmicutes(100);c__Bacilli(100);o__Lactobacillales(100);f__Lactobacillaceae(100);f__Lactobacillaceae_unclassified(100);f__Lactobacillaceae_unclassified(100);	555.242	4.41458	1.29734	3.40278	0.000667028	0.0119153
k__Bacteria(100);p__Firmicutes(100);c__Clostridia(100);o__Clostridiales(100);f__Ruminococcaceae(100);f__Ruminococcaceae_unclassified(100);f__Ruminococcaceae_unclassified(100);.121	2.10294	4.55843	0.845545	5.39112	7.00217e-08	4.72082e-06
k__Bacteria(100);p__Proteobacteria(100);c__Alphaproteobacteria(100);o__RF32(100);o__RF32_unclassified(100);o__RF32_unclassified(100);o__RF32_unclassified(100);.7	6.00096	4.65171	1.27423	3.65061	0.000261621	0.00573847
k__Bacteria(100);p__Proteobacteria(100);p__Proteobacteria_unclassified(100);p__Proteobacteria_unclassified(100);p__Proteobacteria_unclassified(100);p__Proteobacteria_unclassified(100);p__Proteobacteria_unclassified(100);.48	2.05383	4.68383	1.61874	2.8935	0.00380972	0.0452911
k__Bacteria(100);p__Firmicutes(100);p__Firmicutes_unclassified(100);p__Firmicutes_unclassified(100);p__Firmicutes_unclassified(100);p__Firmicutes_unclassified(100);p__Firmicutes_unclassified(100);.85	1.91035	4.69146	1.49461	3.13892	0.00169572	0.0242642
k__Bacteria(100);p__Elusimicrobia(100);c__Elusimicrobia(100);o__Elusimicrobiales(100);f__Elusimicrobiaceae(100);f__Elusimicrobiaceae_unclassified(100);f__Elusimicrobiaceae_unclassified(100);	6.05476	4.73134	1.28716	3.67581	0.000237097	0.00532832
k__Bacteria(100);p__Proteobacteria(100);p__Proteobacteria_unclassified(100);p__Proteobacteria_unclassified(100);p__Proteobacteria_unclassified(100);p__Proteobacteria_unclassified(100);p__Proteobacteria_unclassified(100);.34	3.40569	4.90593	1.41896	3.4574	0.000545414	0.0100877
k__Bacteria(100);p__Bacteroidetes(100);c__Bacteroidia(100);o__Bacteroidales(100);f__Rikenellaceae(100);f__Rikenellaceae_unclassified(100);f__Rikenellaceae_unclassified(100);.41	6.65018	5.10694	1.09746	4.6534	3.26513e-06	0.000155094
k__Bacteria(100);p__Firmicutes(100);c__Clostridia(100);o__Clostridiales(100);f__Ruminococcaceae(100);f__Ruminococcaceae_unclassified(100);f__Ruminococcaceae_unclassified(100);.145	1.48034	5.20089	1.72802	3.00974	0.00261471	0.034388
k__Bacteria(100);p__Proteobacteria(100);p__Proteobacteria_unclassified(100);p__Proteobacteria_unclassified(100);p__Proteobacteria_unclassified(100);p__Proteobacteria_unclassified(100);p__Proteobacteria_unclassified(100);.29	4.46719	5.38219	1.60743	3.34832	0.000813032	0.0138149
k__Bacteria(100);p__Bacteroidetes(100);c__Bacteroidia(100);o__Bacteroidales(100);f__Porphyromonadaceae(100);g__Paludibacter(100);g__Paludibacter_unclassified(100);.16	7.22794	5.76518	1.83778	3.13704	0.00170662	0.0242642
k__Bacteria(100);p__Proteobacteria(100);c__Alphaproteobacteria(100);o__Rhodobacterales(100);f__Rhodobacteraceae(100);g__Rhodobacter(100);g__Rhodobacter_unclassified(100);	2.11757	5.88827	1.86394	3.15905	0.00158287	0.0231342
k__Bacteria(100);p__Bacteroidetes(100);c__Bacteroidia(100);o__Bacteroidales(100);o__Bacteroidales_unclassified(100);o__Bacteroidales_unclassified(100);o__Bacteroidales_unclassified(100);.23	14.3478	5.92285	1.29588	4.57052	4.86515e-06	0.000211837
k__Bacteria(100);p__Bacteroidetes(100);c__Bacteroidia(100);o__Bacteroidales(100);f__Porphyromonadaceae(100);g__Paludibacter(100);g__Paludibacter_unclassified(100);.15	10.7238	5.99315	1.39479	4.29681	1.73272e-05	0.000574824
k__Bacteria(100);p__Firmicutes(100);c__Clostridia(100);o__Clostridiales(100);f__Clostridiaceae(97);g__SMB53(97);g__SMB53_unclassified(97);	3.09081	6.02099	1.79626	3.35196	0.000802424	0.0137464
k__Bacteria(100);p__Firmicutes(100);c__Clostridia(100);c__Clostridia_unclassified(92);c__Clostridia_unclassified(92);c__Clostridia_unclassified(92);c__Clostridia_unclassified(92);	3.20754	6.03916	1.90942	3.16282	0.0015625	0.0229974
k__Bacteria(100);p__Firmicutes(100);c__Bacilli(100);o__Lactobacillales(100);f__Streptococcaceae(100);g__Lactococcus(100);g__Lactococcus_unclassified(100);	9.61466	6.261	1.40956	4.44183	8.91985e-06	0.000345231
k__Bacteria(100);p__Bacteroidetes(100);c__Bacteroidia(100);o__Bacteroidales(100);o__Bacteroidales_unclassified(100);o__Bacteroidales_unclassified(100);o__Bacteroidales_unclassified(100);.39	5.26704	6.36975	1.64157	3.88028	0.000104338	0.00272584
k__Bacteria(100);p__Proteobacteria(100);c__Betaproteobacteria(100);o__Burkholderiales(100);f__Comamonadaceae(100);f__Comamonadaceae_unclassified(82);f__Comamonadaceae_unclassified(82);	3.93054	6.52419	1.86489	3.49843	0.000468014	0.00889226
k__Bacteria(100);p__Verrucomicrobia(100);c__Opitutae(100);o__[Cerasicoccales](100);f__[Cerasicoccaceae](100);f__[Cerasicoccaceae]_unclassified(100);f__[Cerasicoccaceae]_unclassified(100);.2	10.6898	6.57438	1.76948	3.71543	0.000202861	0.00465912
k__Bacteria(100);p__Firmicutes(100);c__Clostridia(100);o__Clostridiales(100);f__Lachnospiraceae(100);g__[Ruminococcus](99);s__gnavus(99);	4.2805	6.77604	2.07822	3.2605	0.00111216	0.0177436
k__Bacteria(100);p__Firmicutes(100);c__Clostridia(100);o__Clostridiales(100);f__Lachnospiraceae(100);f__Lachnospiraceae_unclassified(94);f__Lachnospiraceae_unclassified(94);.1	2.95934	6.78352	1.93331	3.50877	0.000450192	0.00879348
k__Bacteria(100);p__Proteobacteria(100);p__Proteobacteria_unclassified(100);p__Proteobacteria_unclassified(100);p__Proteobacteria_unclassified(100);p__Proteobacteria_unclassified(100);p__Proteobacteria_unclassified(100);.16	8.83163	6.84746	1.89379	3.61575	0.000299478	0.00632232
k__Bacteria(100);p__Firmicutes(100);c__Clostridia(100);o__Clostridiales(100);f__Lachnospiraceae(100);g__Blautia(100);s__obeum(99);	3.53718	7.03203	2.35876	2.98124	0.00287084	0.0370374
k__Bacteria(100);p__Firmicutes(100);c__Clostridia(100);o__Clostridiales(100);f__Lachnospiraceae(100);f__Lachnospiraceae_unclassified(100);f__Lachnospiraceae_unclassified(100);.49	3.64762	7.08998	2.33383	3.03792	0.00238217	0.0325408
k__Bacteria(100);p__Synergistetes(100);c__Synergistia(100);o__Synergistales(100);f__Synergistaceae(100);g__Candidatus_Tammella(100);g__Candidatus_Tammella_unclassified(100);.10	4.02501	7.14737	2.18646	3.26893	0.00107955	0.0174904
k__Bacteria(100);p__Bacteroidetes(100);c__Bacteroidia(100);o__Bacteroidales(100);f__Porphyromonadaceae(100);g__Paludibacter(100);g__Paludibacter_unclassified(100);.20	5.00223	7.15335	1.96196	3.64602	0.000266331	0.00573847
k__Bacteria(100);p__Firmicutes(100);c__Clostridia(100);o__Clostridiales(100);f__Ruminococcaceae(100);g__Ruminococcus(100);g__Ruminococcus_unclassified(100);.13	7.83148	7.19331	1.69658	4.23989	2.23625e-05	0.000719041
k__Bacteria(100);p__Firmicutes(100);c__Clostridia(100);o__Clostridiales(100);f__Lachnospiraceae(100);g__Clostridium(100);s__clostridioforme(100);	5.84906	7.24176	2.03932	3.55106	0.000383685	0.00763715
k__Bacteria(100);p__Proteobacteria(100);c__Gammaproteobacteria(100);o__Pseudomonadales(100);f__Moraxellaceae(100);g__Acinetobacter(100);s__guillouiae(63);	40.0271	7.30524	1.23708	5.90523	3.52152e-09	2.94399e-07
k__Bacteria(100);p__Firmicutes(100);c__Bacilli(100);o__Lactobacillales(100);f__Streptococcaceae(100);g__Lactococcus(100);s__garvieae(100);	13.7318	7.41245	1.4478	5.11981	3.05842e-07	1.82631e-05
[truncated: 20 more rows]

## Sheet: Lab v Wild P. americana T14
	baseMean	log2FoldChange	lfcSE	stat	pvalue	padj
[truncated: 530 more rows]

## Sheet: Lab v Wild P. fuliginosa T0
	baseMean	log2FoldChange	lfcSE	stat	pvalue	padj
[truncated: 992 more rows]

[truncated: 3 more sheets: Wild P. fuliginosa T0 v T14, Lab v Wild P. fuliginosa T14, P. americana v P fuliginosa T0]
