# Supplementary material for: Differences in Gut Microbiome Composition Between Sympatric Wild and Allopatric Laboratory Populations of Omnivorous Cockroaches
Source: Front Microbiol. 2021 Jul 28;12:703785. doi: 10.3389/fmicb.2021.703785 (PMC8355983; doi:10.3389/fmicb.2021.703785)
Supplement: Supplementary file 6 [file Table_5.xlsx]

## Sheet: raw
			Lab Florida						Wild American						Wild Smoky Brown						Wild
			lab v T0		T0 v T14		lab v T14		lab v T0		T0 v T14		lab v T14		lab v T0		T0 v T14		lab v T14		lab v American T0		American T0 v Smoky Brown T0		lab v Smoky Brown T0
Full Taxa Name	Shorted Taxa Name	baseMean	log2FoldChange	padj	log2FoldChange	padj	log2FoldChange	padj	log2FoldChange	padj	log2FoldChange	padj	log2FoldChange	padj	log2FoldChange	padj	log2FoldChange	padj	log2FoldChange	padj	log2FoldChange	padj	log2FoldChange	padj	log2FoldChange	padj
k__Bacteria(100);k__Bacteria_unclassified(100);k__Bacteria_unclassified(100);k__Bacteria_unclassified(100);k__Bacteria_unclassified(100);k__Bacteria_unclassified(100);k__Bacteria_unclassified(100);	Unclassified Bacteria	172.432	7.0001	0.000693817	-3.14372	0.699014	3.85638	0.110501	4.93821	0.00625832	-4.48743	0.0440309	0.450774	0.970724	26.9322	1.65475e-56	0	1	29.1967	7.97054e-79	4.93821	0.00625832	21.994	8.377e-38	26.9322	1.65475e-56
k__Bacteria(100);k__Bacteria_unclassified(100);k__Bacteria_unclassified(100);k__Bacteria_unclassified(100);k__Bacteria_unclassified(100);k__Bacteria_unclassified(100);k__Bacteria_unclassified(100);.169	Unclassified Bacteria	2.34234	-0.152428	1	-0.759185	NA	-0.911613	0.853708	-1.17445	0.504464	-1.06628	0.606278	-2.24073	0.106066	-5.76781	7.45203e-08	3.16938	0.00214994	-2.59843	0.0228247	-1.17445	0.504464	-4.59336	1.69792e-05	-5.76781	7.45203e-08
k__Bacteria(100);k__Bacteria_unclassified(100);k__Bacteria_unclassified(100);k__Bacteria_unclassified(100);k__Bacteria_unclassified(100);k__Bacteria_unclassified(100);k__Bacteria_unclassified(100);.18	Unclassified Bacteria	26.0278	-22.1444	6.35159e-27	0.26932	1	-21.8751	2.42746e-26	-15.2158	1.55386e-14	38.7786	4.95364e-90	0	1	-20.9939	8.04731e-29	-1.03067	0.915826	-22.0245	2.11071e-36	-15.2158	1.55386e-14	-5.77809	0.00560691	-20.9939	8.04731e-29
k__Bacteria(100);k__Bacteria_unclassified(100);k__Bacteria_unclassified(100);k__Bacteria_unclassified(100);k__Bacteria_unclassified(100);k__Bacteria_unclassified(100);k__Bacteria_unclassified(100);.32	Unclassified Bacteria	15.0312	1.77817	0.0101003	-0.406273	1	1.37189	0.0641957	2.98999	3.33968e-08	-0.826492	0.346349	2.1635	0.000167904	7.70016	2.71443e-21	0	1	9.02706	3.89002e-37	2.98999	3.33968e-08	4.71018	4.46137e-08	7.70016	2.71443e-21
k__Bacteria(100);k__Bacteria_unclassified(100);k__Bacteria_unclassified(100);k__Bacteria_unclassified(100);k__Bacteria_unclassified(100);k__Bacteria_unclassified(100);k__Bacteria_unclassified(100);.37	Unclassified Bacteria	22.4956	-0.725724	0.918365	3.76122	0.113007	3.03549	0.0629655	4.28964	0.000537056	1.17298	0.607509	5.46263	2.41048e-05	7.93108	1.8994e-09	0	1	9.25797	4.59999e-15	4.28964	0.000537056	3.64144	0.0130885	7.93108	1.8994e-09
k__Bacteria(100);k__Bacteria_unclassified(100);k__Bacteria_unclassified(100);k__Bacteria_unclassified(100);k__Bacteria_unclassified(100);k__Bacteria_unclassified(100);k__Bacteria_unclassified(100);.45	Unclassified Bacteria	12.6689	0.572808	1	3.23898	0.778911	3.81179	0.192537	5.67984	0.00728151	18.0691	5.00352e-19	23.7489	9.03913e-35	4.8535	0.0195386	20.9786	5.91847e-29	25.8321	8.95971e-49	5.67984	0.00728151	-0.82634	0.78605	4.8535	0.0195386
k__Bacteria(100);k__Bacteria_unclassified(100);k__Bacteria_unclassified(100);k__Bacteria_unclassified(100);k__Bacteria_unclassified(100);k__Bacteria_unclassified(100);k__Bacteria_unclassified(100);.59	Unclassified Bacteria	9.26094	-3.60524	3.40112e-05	0.41266	1	-3.19258	0.000360209	-4.04608	6.11779e-08	0.936532	0.369882	-3.10954	0.00011046	-1.99822	0.0165088	0.431946	0.880729	-1.56628	0.0531232	-4.04608	6.11779e-08	2.04785	0.00576397	-1.99822	0.0165088
k__Bacteria(100);k__Bacteria_unclassified(100);k__Bacteria_unclassified(100);k__Bacteria_unclassified(100);k__Bacteria_unclassified(100);k__Bacteria_unclassified(100);k__Bacteria_unclassified(100);.6	Unclassified Bacteria	56.7692	0.364554	0.927794	0.219732	1	0.584286	0.689757	-1.83986	0.00414712	1.37742	0.0932514	-0.462436	0.630646	2.05047	0.00150749	2.56144	0.000346578	4.61192	1.15004e-15	-1.83986	0.00414712	3.89033	3.61728e-10	2.05047	0.00150749
k__Bacteria(100);k__Bacteria_unclassified(100);k__Bacteria_unclassified(100);k__Bacteria_unclassified(100);k__Bacteria_unclassified(100);k__Bacteria_unclassified(100);k__Bacteria_unclassified(100);.60	Unclassified Bacteria	6.48502	6.61703	1.13835e-05	0.324457	1	6.94148	3.88412e-06	3.13716	0.00876114	-1.09316	0.5945	2.044	0.122615	6.89772	4.5551e-08	0	1	8.22461	2.33091e-13	3.13716	0.00876114	3.76055	0.00624845	6.89772	4.5551e-08
k__Bacteria(100);k__Bacteria_unclassified(100);k__Bacteria_unclassified(100);k__Bacteria_unclassified(100);k__Bacteria_unclassified(100);k__Bacteria_unclassified(100);k__Bacteria_unclassified(100);.8	Unclassified Bacteria	41.5997	3.83282	2.70086e-06	0.38488	1	4.2177	2.53536e-07	1.88805	0.00913048	-2.69024	0.00040822	-0.80219	0.368041	8.43683	9.60426e-21	-0.343931	1	8.0929	1.75865e-26	1.88805	0.00913048	6.54878	1.68727e-12	8.43683	9.60426e-21
k__Bacteria(100);p__Actinobacteria(100);c__Coriobacteriia(100);o__Coriobacteriales(100);f__Coriobacteriaceae(100);f__Coriobacteriaceae_unclassified(100);f__Coriobacteriaceae_unclassified(100);	Actinobacteria; Coriobacteriia; Coriobacteriales; Coriobacteriaceae	34.9858	0.830337	0.393296	-0.583337	1	0.246999	1	0.81197	0.241437	0.32591	0.808769	1.13788	0.0836204	2.3152	6.32866e-05	2.83122	8.5022e-06	5.14642	1.91114e-22	0.81197	0.241437	1.50323	0.0156798	2.3152	6.32866e-05
k__Bacteria(100);p__Bacteroidetes(100);c__Bacteroidia(100);o__Bacteroidales(100);f__[Odoribacteraceae](100);f__[Odoribacteraceae]_unclassified(100);f__[Odoribacteraceae]_unclassified(100);	Bacteroidetes; Bacteroidia; Bacteroidales; Odoribacteraceae	126.137	-0.833053	0.546983	0.536447	1	-0.296606	1	1.72968	0.023031	0.058807	1	1.78848	0.0229537	9.76002	1.35517e-26	0.175605	1	9.93562	1.25349e-35	1.72968	0.023031	8.03034	6.53165e-18	9.76002	1.35517e-26
k__Bacteria(100);p__Bacteroidetes(100);c__Bacteroidia(100);o__Bacteroidales(100);f__[Odoribacteraceae](100);g__Odoribacter(100);g__Odoribacter_unclassified(100);.4	Bacteroidetes; Bacteroidia; Bacteroidales; Odoribacteraceae; Odoribacter	25.5706	0	1	0	1	0	1	-12.8436	8.11902e-08	-0.220616	1	-13.0642	1.13171e-07	-22.9821	1.57685e-25	-0.00174261	1	-22.9839	2.79595e-29	-12.8436	8.11902e-08	-10.1385	1.75174e-05	-22.9821	1.57685e-25
k__Bacteria(100);p__Bacteroidetes(100);c__Bacteroidia(100);o__Bacteroidales(100);f__Marinilabiaceae(100);f__Marinilabiaceae_unclassified(100);f__Marinilabiaceae_unclassified(100);	Bacteroidetes; Bacteroidia; Bacteroidales; Marinilabiaceae	74.5354	-0.327459	1	0.800194	1	0.472735	1	1.24808	0.356619	-1.55151	0.325914	-0.303431	0.950102	3.04049	0.00454971	5.96263	5.84684e-07	9.00311	1.06493e-17	1.24808	0.356619	1.79241	0.129574	3.04049	0.00454971
k__Bacteria(100);p__Bacteroidetes(100);c__Bacteroidia(100);o__Bacteroidales(100);f__Porphyromonadaceae(100);f__Porphyromonadaceae_unclassified(100);f__Porphyromonadaceae_unclassified(100);	Bacteroidetes; Bacteroidia; Bacteroidales; Porphyromonadaceae	237.468	0.660963	0.782421	-0.0437836	1	0.617179	0.813676	3.22593	8.2478e-05	-1.36042	0.259276	1.86551	0.0428582	8.43598	1.6081e-23	-3.67672	0.000102885	4.75925	4.42762e-11	3.22593	8.2478e-05	5.21004	3.40153e-09	8.43598	1.6081e-23
k__Bacteria(100);p__Bacteroidetes(100);c__Bacteroidia(100);o__Bacteroidales(100);f__Porphyromonadaceae(100);f__Porphyromonadaceae_unclassified(100);f__Porphyromonadaceae_unclassified(100);.3	Bacteroidetes; Bacteroidia; Bacteroidales; Porphyromonadaceae	50.8988	0.630138	0.896851	-1.62021	0.778911	-0.990067	0.64637	2.28236	0.034027	-1.50285	0.318994	0.779511	0.602104	3.93791	0.000152258	-6.03297	2.1555e-09	-2.09506	0.0326726	2.28236	0.034027	1.65555	0.167495	3.93791	0.000152258
k__Bacteria(100);p__Bacteroidetes(100);c__Bacteroidia(100);o__Bacteroidales(100);f__Porphyromonadaceae(100);g__Candidatus_Azobacteroides(100);g__Candidatus_Azobacteroides_unclassified(100);.11	Bacteroidetes; Bacteroidia; Bacteroidales; Porphyromonadaceae; Candidatus Azobacteroides	49.8541	-1.39126	0.450139	1.05621	1	-0.335053	1	2.79723	0.0119667	0.357971	0.959316	3.1552	0.00562288	8.31921	2.22266e-12	0	1	9.64611	6.62837e-20	2.79723	0.0119667	5.52198	8.80721e-06	8.31921	2.22266e-12
k__Bacteria(100);p__Bacteroidetes(100);c__Bacteroidia(100);o__Bacteroidales(100);f__Porphyromonadaceae(100);g__Candidatus_Azobacteroides(100);g__Candidatus_Azobacteroides_unclassified(100);.14	Bacteroidetes; Bacteroidia; Bacteroidales; Porphyromonadaceae; Candidatus Azobacteroides	40.6406	-18.2519	1.32414e-39	-5.26104	0.00687595	-23.5129	2.22733e-69	-22.4525	2.9819e-75	0.184129	1	-22.2683	1.46072e-71	-18.6595	2.13066e-48	45.7064	0	0	1	-22.4525	2.9819e-75	3.79293	0.00268039	-18.6595	2.13066e-48
k__Bacteria(100);p__Bacteroidetes(100);c__Bacteroidia(100);o__Bacteroidales(100);f__Porphyromonadaceae(100);g__Candidatus_Azobacteroides(100);g__Candidatus_Azobacteroides_unclassified(100);.21	Bacteroidetes; Bacteroidia; Bacteroidales; Porphyromonadaceae; Candidatus Azobacteroides	18.079	0	1	0	1	0	1	-4.73459	0.0160553	-1.01833	0.799039	-5.75292	0.00355145	-9.35614	1.13848e-07	7.96425	7.66784e-06	-1.39189	0.651859	-4.73459	0.0160553	-4.62154	0.0101606	-9.35614	1.13848e-07
k__Bacteria(100);p__Bacteroidetes(100);c__Bacteroidia(100);o__Bacteroidales(100);f__Porphyromonadaceae(100);g__Candidatus_Azobacteroides(100);g__Candidatus_Azobacteroides_unclassified(100);.4	Bacteroidetes; Bacteroidia; Bacteroidales; Porphyromonadaceae; Candidatus Azobacteroides	110.113	-0.921205	0.719612	0.970497	1	0.049292	1	0.244291	1	0.9253	0.607509	1.16959	0.376602	2.6896	0.00947018	24.1897	5.1705e-123	26.8793	1.10591e-159	0.244291	1	2.44531	0.0237868	2.6896	0.00947018
k__Bacteria(100);p__Bacteroidetes(100);c__Bacteroidia(100);o__Bacteroidales(100);f__Porphyromonadaceae(100);g__Candidatus_Azobacteroides(100);g__Candidatus_Azobacteroides_unclassified(100);.7	Bacteroidetes; Bacteroidia; Bacteroidales; Porphyromonadaceae; Candidatus Azobacteroides	74.3029	-1.29234	0.265698	0.943046	0.92787	-0.34929	1	-0.419093	0.776508	-1.35478	0.207946	-1.77387	0.0359595	2.44909	0.00178056	4.91418	9.44098e-08	7.36327	8.70841e-20	-0.419093	0.776508	2.86819	0.000278635	2.44909	0.00178056
k__Bacteria(100);p__Bacteroidetes(100);c__Bacteroidia(100);o__Bacteroidales(100);f__Porphyromonadaceae(100);g__Candidatus_Azobacteroides(100);g__Candidatus_Azobacteroides_unclassified(100);.9	Bacteroidetes; Bacteroidia; Bacteroidales; Porphyromonadaceae; Candidatus Azobacteroides	50.462	1.70159	0.107809	-2.46838	0.0963612	-0.766791	0.643034	2.88705	0.000173483	-0.966128	0.429453	1.92092	0.022588	8.83362	2.06508e-20	0	1	10.1605	2.17222e-33	2.88705	0.000173483	5.94657	2.1414e-09	8.83362	2.06508e-20
k__Bacteria(100);p__Bacteroidetes(100);c__Bacteroidia(100);o__Bacteroidales(100);f__Porphyromonadaceae(100);g__Dysgonomonas(100);g__Dysgonomonas_unclassified(100);.1	Bacteroidetes; Bacteroidia; Bacteroidales; Porphyromonadaceae; Dysgonomonas	110.596	2.76564	0.0121367	-2.59949	0.146491	0.166149	1	6.14048	6.86167e-13	-1.21908	0.402884	4.92139	3.39501e-08	3.0082	0.000702659	-1.29239	0.341279	1.71581	0.0573149	6.14048	6.86167e-13	-3.13227	0.000779191	3.0082	0.000702659
k__Bacteria(100);p__Bacteroidetes(100);c__Bacteroidia(100);o__Bacteroidales(100);f__Porphyromonadaceae(100);g__Dysgonomonas(100);g__Dysgonomonas_unclassified(100);.2	Bacteroidetes; Bacteroidia; Bacteroidales; Porphyromonadaceae; Dysgonomonas	89.1697	-18.8102	1.09483e-28	-2.78358	0.699014	-21.5937	3.64437e-39	-23.8502	6.15196e-58	9.28791	4.12015e-08	-14.5623	8.17935e-18	-24.3843	2.11535e-58	1.58141	0.585622	-22.8029	4.59474e-58	-23.8502	6.15196e-58	-0.534083	0.815931	-24.3843	2.11535e-58
k__Bacteria(100);p__Bacteroidetes(100);c__Bacteroidia(100);o__Bacteroidales(100);f__Porphyromonadaceae(100);g__Dysgonomonas(100);g__Dysgonomonas_unclassified(100);.20	Bacteroidetes; Bacteroidia; Bacteroidales; Porphyromonadaceae; Dysgonomonas	22.7801	-2.08401	0.431298	4.4057	0.159132	2.32169	0.359735	3.54835	0.0325339	-0.738914	0.870183	2.80944	0.118333	23.2465	2.16517e-52	-17.0034	7.58545e-28	6.2431	1.74588e-05	3.54835	0.0325339	19.6981	4.28951e-37	23.2465	2.16517e-52
k__Bacteria(100);p__Bacteroidetes(100);c__Bacteroidia(100);o__Bacteroidales(100);f__Porphyromonadaceae(100);g__Dysgonomonas(100);g__Dysgonomonas_unclassified(100);.21	Bacteroidetes; Bacteroidia; Bacteroidales; Porphyromonadaceae; Dysgonomonas	10.5347	0	1	0	1	0	1	-3.55214	0.0273546	-3.44711	0.0466566	-6.99924	2.45274e-06	-7.41884	1.63826e-07	0.960272	0.790374	-6.45857	1.37635e-06	-3.55214	0.0273546	-3.8667	0.00566651	-7.41884	1.63826e-07
k__Bacteria(100);p__Bacteroidetes(100);c__Bacteroidia(100);o__Bacteroidales(100);f__Porphyromonadaceae(100);g__Dysgonomonas(100);g__Dysgonomonas_unclassified(100);.26	Bacteroidetes; Bacteroidia; Bacteroidales; Porphyromonadaceae; Dysgonomonas	11.0424	-2.91846	0.237884	-3.69715	0.312333	-6.61561	0.000256203	0	1	-4.92651	0.00971522	-4.67507	0.00649664	-8.34665	3.68809e-08	4.38968	0.00618207	-3.95697	0.0107174	0	1	-8.59809	2.14878e-08	-8.34665	3.68809e-08
k__Bacteria(100);p__Bacteroidetes(100);c__Bacteroidia(100);o__Bacteroidales(100);f__Porphyromonadaceae(100);g__Dysgonomonas(100);g__Dysgonomonas_unclassified(100);.27	Bacteroidetes; Bacteroidia; Bacteroidales; Porphyromonadaceae; Dysgonomonas	11.5313	-2.15618	0.138696	1.78904	0.74716	-0.367139	1	2.2441	0.0536023	-1.52452	0.349109	0.719577	0.673262	5.65107	2.37086e-06	0	1	6.97796	5.27792e-11	2.2441	0.0536023	3.40697	0.00907235	5.65107	2.37086e-06
k__Bacteria(100);p__Bacteroidetes(100);c__Bacteroidia(100);o__Bacteroidales(100);f__Porphyromonadaceae(100);g__Dysgonomonas(100);g__Dysgonomonas_unclassified(100);.35	Bacteroidetes; Bacteroidia; Bacteroidales; Porphyromonadaceae; Dysgonomonas	4.92722	5.99441	0.000153315	-4.3598	0.0963612	1.63461	0.426579	6.17451	2.62063e-06	-3.32361	0.0576784	2.8509	0.0319051	2.96744	0.0175227	1.75425	0.372974	4.7217	2.03105e-05	6.17451	2.62063e-06	-3.20707	0.0294162	2.96744	0.0175227
k__Bacteria(100);p__Bacteroidetes(100);c__Bacteroidia(100);o__Bacteroidales(100);f__Porphyromonadaceae(100);g__Dysgonomonas(100);g__Dysgonomonas_unclassified(100);.4	Bacteroidetes; Bacteroidia; Bacteroidales; Porphyromonadaceae; Dysgonomonas	58.6556	1.5928	0.360923	-2.17426	0.569626	-0.58146	0.948958	5.86928	3.90735e-08	-2.57239	0.0806892	3.2969	0.00378032	2.75555	0.011118	-3.54192	0.00202813	-0.786366	0.629399	5.86928	3.90735e-08	-3.11373	0.00758233	2.75555	0.011118
k__Bacteria(100);p__Bacteroidetes(100);c__Bacteroidia(100);o__Bacteroidales(100);f__Porphyromonadaceae(100);g__Dysgonomonas(100);g__Dysgonomonas_unclassified(100);.8	Bacteroidetes; Bacteroidia; Bacteroidales; Porphyromonadaceae; Dysgonomonas	28.4896	0	1	0	1	0	1	-15.0894	3.3934e-16	-3.1464	0.256871	-18.2358	5.52774e-25	-23.5024	1.6868e-42	1.11279	0.845878	-22.3896	5.4159e-44	-15.0894	3.3934e-16	-8.41298	5.32579e-06	-23.5024	1.6868e-42
k__Bacteria(100);p__Bacteroidetes(100);c__Bacteroidia(100);o__Bacteroidales(100);f__Porphyromonadaceae(100);g__Paludibacter(100);g__Paludibacter_unclassified(100);.1	Bacteroidetes; Bacteroidia; Bacteroidales; Porphyromonadaceae; Paludibacter	107.075	0.219488	1	0.00161126	1	0.221099	1	1.53517	0.00441433	-0.49795	0.591515	1.03722	0.0836204	9.80766	3.47375e-35	0	1	11.1346	5.65991e-58	1.53517	0.00441433	8.27249	6.07574e-25	9.80766	3.47375e-35
k__Bacteria(100);p__Bacteroidetes(100);c__Bacteroidia(100);o__Bacteroidales(100);f__Porphyromonadaceae(100);g__Paludibacter(100);g__Paludibacter_unclassified(100);.11	Bacteroidetes; Bacteroidia; Bacteroidales; Porphyromonadaceae; Paludibacter	20.4742	-3.02706	0.143668	1.49201	1	-1.53505	0.621922	-3.79564	0.0142964	0.496465	0.954344	-3.29917	0.0440386	4.00532	0.0149733	0	1	5.33221	0.00027025	-3.79564	0.0142964	7.80096	5.56869e-07	4.00532	0.0149733
k__Bacteria(100);p__Bacteroidetes(100);c__Bacteroidia(100);o__Bacteroidales(100);f__Porphyromonadaceae(100);g__Paludibacter(100);g__Paludibacter_unclassified(100);.14	Bacteroidetes; Bacteroidia; Bacteroidales; Porphyromonadaceae; Paludibacter	15.4414	-7.97079	3.12427e-06	0.201903	1	-7.76889	6.54796e-06	-4.28583	0.0095256	-3.78707	0.0364728	-8.0729	1.69463e-07	0	1	0	1	0	1	-4.28583	0.0095256	3.67147	0.0292186	0	1
k__Bacteria(100);p__Bacteroidetes(100);c__Bacteroidia(100);o__Bacteroidales(100);f__Porphyromonadaceae(100);g__Paludibacter(100);g__Paludibacter_unclassified(100);.6	Bacteroidetes; Bacteroidia; Bacteroidales; Porphyromonadaceae; Paludibacter	47.2168	-5.98111	0.000633647	10.7746	1.64153e-07	4.79352	0.0243536	-3.52144	0.0282052	1.7647	0.463536	-1.75675	0.368562	20.8004	2.32159e-43	0	1	22.2551	7.69918e-59	-3.52144	0.0282052	24.3218	2.88963e-60	20.8004	2.32159e-43
k__Bacteria(100);p__Bacteroidetes(100);c__Bacteroidia(100);o__Bacteroidales(100);f__Porphyromonadaceae(100);g__Paludibacter(100);g__Paludibacter_unclassified(100);.8	Bacteroidetes; Bacteroidia; Bacteroidales; Porphyromonadaceae; Paludibacter	22.2992	-5.17012	0.000895222	-1.29539	0.997192	-6.46552	1.22194e-05	-8.62663	6.04152e-12	2.65536	0.0834755	-5.97127	1.1009e-05	-8.22312	6.6739e-11	3.45574	0.00757257	-4.76738	0.000124487	-8.62663	6.04152e-12	0.40351	0.816195	-8.22312	6.6739e-11
k__Bacteria(100);p__Bacteroidetes(100);c__Bacteroidia(100);o__Bacteroidales(100);f__Porphyromonadaceae(100);g__Parabacteroides(100);g__Parabacteroides_unclassified(100);	Bacteroidetes; Bacteroidia; Bacteroidales; Porphyromonadaceae; Parabacteroides	173.171	2.6234	0.0154828	0.111883	1	2.73529	0.0117485	3.31286	0.000154934	-0.500173	0.807632	2.81269	0.00250044	11.5293	2.30545e-29	0	1	12.8562	6.98833e-45	3.31286	0.000154934	8.21644	6.05529e-15	11.5293	2.30545e-29
k__Bacteria(100);p__Bacteroidetes(100);c__Bacteroidia(100);o__Bacteroidales(100);f__Porphyromonadaceae(100);g__Tannerella(100);g__Tannerella_unclassified(100);.2	Bacteroidetes; Bacteroidia; Bacteroidales; Porphyromonadaceae; Tannerella	49.2917	-1.45932	0.192982	0.695588	1	-0.763736	0.649378	-2.52941	0.00117474	2.61751	0.00291158	0.0881001	1	6.57067	1.63064e-11	1.5892	0.415758	8.15988	1.5074e-21	-2.52941	0.00117474	9.10008	1.67031e-21	6.57067	1.63064e-11
k__Bacteria(100);p__Bacteroidetes(100);c__Bacteroidia(100);o__Bacteroidales(100);f__Porphyromonadaceae(99);f__Porphyromonadaceae_unclassified(70);f__Porphyromonadaceae_unclassified(70);	Bacteroidetes; Bacteroidia; Bacteroidales; Porphyromonadaceae	58.4033	-0.0558957	1	-1.53834	0.456998	-1.59423	0.0912397	1.52369	0.0427232	-0.95368	0.373466	0.570012	0.577785	7.00535	7.62886e-17	0.266864	1	7.27221	2.65858e-24	1.52369	0.0427232	5.48166	2.35337e-10	7.00535	7.62886e-17
k__Bacteria(100);p__Bacteroidetes(100);c__Bacteroidia(100);o__Bacteroidales(100);f__Rikenellaceae(100);f__Rikenellaceae_unclassified(100);f__Rikenellaceae_unclassified(100);	Bacteroidetes; Bacteroidia; Bacteroidales; Rikenellaceae	192.459	-0.331403	0.833095	0.301991	1	-0.0294117	1	-1.33902	0.00394691	-0.12643	0.988081	-1.46545	0.0021348	-3.57402	1.26515e-17	-0.0170068	1	-3.59103	1.22181e-20	-1.33902	0.00394691	-2.235	2.15734e-07	-3.57402	1.26515e-17
k__Bacteria(100);p__Bacteroidetes(100);c__Bacteroidia(100);o__Bacteroidales(100);f__Rikenellaceae(100);f__Rikenellaceae_unclassified(100);f__Rikenellaceae_unclassified(100);.11	Bacteroidetes; Bacteroidia; Bacteroidales; Rikenellaceae	41.9734	-0.421186	1	0.673902	1	0.252717	1	-3.14092	0.0242855	-1.86996	0.343175	-5.01088	0.000219994	4.65783	0.00153341	0.579496	1	5.23733	7.39185e-05	-3.14092	0.0242855	7.79875	4.00007e-08	4.65783	0.00153341
k__Bacteria(100);p__Bacteroidetes(100);c__Bacteroidia(100);o__Bacteroidales(100);f__Rikenellaceae(100);f__Rikenellaceae_unclassified(100);f__Rikenellaceae_unclassified(100);.12	Bacteroidetes; Bacteroidia; Bacteroidales; Rikenellaceae	32.5503	2.13178	0.018638	0.257405	1	2.38918	0.00737695	2.24053	0.00242043	0.0471744	1	2.2877	0.0029336	6.83852	1.45202e-17	3.18043	0.00736363	10.019	7.74986e-35	2.24053	0.00242043	4.598	3.74574e-08	6.83852	1.45202e-17
k__Bacteria(100);p__Bacteroidetes(100);c__Bacteroidia(100);o__Bacteroidales(100);f__Rikenellaceae(100);f__Rikenellaceae_unclassified(100);f__Rikenellaceae_unclassified(100);.30	Bacteroidetes; Bacteroidia; Bacteroidales; Rikenellaceae	10.8243	0.17312	1	-3.05821	0.213422	-2.88509	0.0473752	-2.57376	0.0298741	1.66177	0.3118	-0.911999	0.630208	-7.38889	8.52502e-14	1.36408	0.257553	-6.02481	2.26138e-10	-2.57376	0.0298741	-4.81513	4.1122e-08	-7.38889	8.52502e-14
k__Bacteria(100);p__Bacteroidetes(100);c__Bacteroidia(100);o__Bacteroidales(100);f__Rikenellaceae(100);f__Rikenellaceae_unclassified(100);f__Rikenellaceae_unclassified(100);.53	Bacteroidetes; Bacteroidia; Bacteroidales; Rikenellaceae	4.74335	3.34354	0.0151175	-1.1003	1	2.24324	0.136063	6.13703	2.21347e-07	-3.17268	0.0464096	2.96435	0.00995007	6.45016	5.37985e-08	0	1	7.77705	1.48036e-13	6.13703	2.21347e-07	0.31313	0.900278	6.45016	5.37985e-08
k__Bacteria(100);p__Bacteroidetes(100);c__Bacteroidia(100);o__Bacteroidales(100);f__Rikenellaceae(100);f__Rikenellaceae_unclassified(100);f__Rikenellaceae_unclassified(100);.7	Bacteroidetes; Bacteroidia; Bacteroidales; Rikenellaceae	68.1955	-0.00373082	1	0.00155638	1	-0.00217444	1	2.22115	0.000310228	-1.29049	0.122004	0.930661	0.209297	9.10663	7.04789e-27	0.937487	0.713903	10.0441	1.59732e-41	2.22115	0.000310228	6.88548	2.68697e-15	9.10663	7.04789e-27
k__Bacteria(100);p__Bacteroidetes(100);c__Bacteroidia(100);o__Bacteroidales(100);f__Rikenellaceae(100);f__Rikenellaceae_unclassified(100);f__Rikenellaceae_unclassified(100);.9	Bacteroidetes; Bacteroidia; Bacteroidales; Rikenellaceae	40.7718	0	1	0	1	0	1	-10.3703	1.17245e-21	3.31123	0.00370985	-7.05904	9.09539e-10	-6.26483	4.5551e-08	1.98482	0.129772	-4.28001	0.000124096	-10.3703	1.17245e-21	4.10544	3.53768e-05	-6.26483	4.5551e-08
k__Bacteria(100);p__Bacteroidetes(100);c__Bacteroidia(100);o__Bacteroidales(100);f__Rikenellaceae(97);f__Rikenellaceae_unclassified(97);f__Rikenellaceae_unclassified(97);	Bacteroidetes; Bacteroidia; Bacteroidales; Rikenellaceae	14.9529	0	1	0	1	0	1	-4.33706	0.0128216	-0.6613	0.897783	-4.99836	0.00452745	-7.76754	8.1201e-07	-0.206828	1	-7.97437	5.20295e-08	-4.33706	0.0128216	-3.43048	0.0330729	-7.76754	8.1201e-07
k__Bacteria(100);p__Bacteroidetes(100);c__Bacteroidia(100);o__Bacteroidales(100);o__Bacteroidales_unclassified(100);o__Bacteroidales_unclassified(100);o__Bacteroidales_unclassified(100);	Bacteroidetes; Bacteroidia; Bacteroidales; Bacteroidales	468.77	-5.2158	0.00575288	-3.71109	0.239915	-8.9269	1.20507e-07	-7.13674	3.25483e-06	-6.73959	5.41599e-06	-13.8763	1.15521e-21	-11.7667	6.1674e-16	4.77556	0.00149756	-6.99112	7.46074e-07	-7.13674	3.25483e-06	-4.62994	0.00132128	-11.7667	6.1674e-16
k__Bacteria(100);p__Bacteroidetes(100);c__Bacteroidia(100);o__Bacteroidales(100);o__Bacteroidales_unclassified(100);o__Bacteroidales_unclassified(100);o__Bacteroidales_unclassified(100);.10	Bacteroidetes; Bacteroidia; Bacteroidales; Bacteroidales	64.8915	2.09277	0.316078	-0.491394	1	1.60138	0.517026	3.4421	0.0129557	2.64117	0.150856	6.08327	6.50733e-06	7.47363	1.53192e-08	2.07811	0.360446	9.55174	9.88242e-15	3.4421	0.0129557	4.03153	0.00457948	7.47363	1.53192e-08
k__Bacteria(100);p__Bacteroidetes(100);c__Bacteroidia(100);o__Bacteroidales(100);o__Bacteroidales_unclassified(100);o__Bacteroidales_unclassified(100);o__Bacteroidales_unclassified(100);.12	Bacteroidetes; Bacteroidia; Bacteroidales; Bacteroidales	61.946	-23.3605	1.25999e-46	-0.630829	1	-23.9913	3.32747e-49	-22.6671	3.43181e-53	0.545453	0.946804	-22.1216	7.94552e-49	-12.7709	2.82439e-14	-8.77533	5.11417e-08	-21.5462	1.14939e-52	-22.6671	3.43181e-53	9.89618	5.78604e-10	-12.7709	2.82439e-14
k__Bacteria(100);p__Bacteroidetes(100);c__Bacteroidia(100);o__Bacteroidales(100);o__Bacteroidales_unclassified(100);o__Bacteroidales_unclassified(100);o__Bacteroidales_unclassified(100);.14	Bacteroidetes; Bacteroidia; Bacteroidales; Bacteroidales	45.4931	1.68997	0.722262	8.03776	0.0132813	9.72773	2.0188e-05	4.50955	0.0244788	-4.12273	0.101595	0.386822	1	25.5077	1.77837e-44	0	1	26.6342	2.08456e-57	4.50955	0.0244788	20.9982	5.40444e-30	25.5077	1.77837e-44
k__Bacteria(100);p__Bacteroidetes(100);c__Bacteroidia(100);o__Bacteroidales(100);o__Bacteroidales_unclassified(100);o__Bacteroidales_unclassified(100);o__Bacteroidales_unclassified(100);.19	Bacteroidetes; Bacteroidia; Bacteroidales; Bacteroidales	17.798	0	1	0	1	0	1	-13.8002	2.05575e-08	-0.132307	1	-13.9325	3.67726e-08	-19.3893	6.3758e-17	-3.84478	0.25766	-23.2341	5.10368e-28	-13.8002	2.05575e-08	-5.58908	0.0347425	-19.3893	6.3758e-17
k__Bacteria(100);p__Bacteroidetes(100);c__Bacteroidia(100);o__Bacteroidales(100);o__Bacteroidales_unclassified(100);o__Bacteroidales_unclassified(100);o__Bacteroidales_unclassified(100);.29	Bacteroidetes; Bacteroidia; Bacteroidales; Bacteroidales	9.65888	0	1	0	1	0	1	-12.5676	0.000538537	-0.431239	1	-12.9988	0.00054995	-22.0739	3.77353e-11	1.20858	1	-20.8654	1.53115e-11	-12.5676	0.000538537	-9.50638	0.00943522	-22.0739	3.77353e-11
k__Bacteria(100);p__Bacteroidetes(100);c__Bacteroidia(100);o__Bacteroidales(100);o__Bacteroidales_unclassified(100);o__Bacteroidales_unclassified(100);o__Bacteroidales_unclassified(100);.3	Bacteroidetes; Bacteroidia; Bacteroidales; Bacteroidales	275.122	2.13447	0.0387481	1.34716	0.74716	3.48163	0.00016986	2.20648	0.00851707	0.040823	1	2.2473	0.00948456	11.7632	7.30384e-34	1.39473	0.535673	13.1579	1.83023e-52	2.20648	0.00851707	9.55674	2.64173e-22	11.7632	7.30384e-34
k__Bacteria(100);p__Bacteroidetes(100);c__Bacteroidia(100);o__Bacteroidales(100);o__Bacteroidales_unclassified(100);o__Bacteroidales_unclassified(100);o__Bacteroidales_unclassified(100);.31	Bacteroidetes; Bacteroidia; Bacteroidales; Bacteroidales	9.40183	-0.897947	0.926751	-1.57705	1	-2.475	0.280588	-7.85702	2.90944e-09	1.3247	0.518704	-6.53233	2.80387e-06	-4.97111	0.000335544	3.04843	0.0568856	-1.92268	0.249279	-7.85702	2.90944e-09	2.88591	0.030154	-4.97111	0.000335544
k__Bacteria(100);p__Bacteroidetes(100);c__Bacteroidia(100);o__Bacteroidales(100);o__Bacteroidales_unclassified(100);o__Bacteroidales_unclassified(100);o__Bacteroidales_unclassified(100);.4	Bacteroidetes; Bacteroidia; Bacteroidales; Bacteroidales	288.233	2.3533	0.0709959	-2.78391	0.159648	-0.430613	1	4.8012	4.87595e-07	-0.971914	0.572041	3.82928	0.000160428	7.5521	6.94583e-15	-5.70145	8.20365e-09	1.85065	0.0634013	4.8012	4.87595e-07	2.7509	0.0109587	7.5521	6.94583e-15
k__Bacteria(100);p__Bacteroidetes(100);c__Bacteroidia(100);o__Bacteroidales(100);o__Bacteroidales_unclassified(100);o__Bacteroidales_unclassified(100);o__Bacteroidales_unclassified(100);.5	Bacteroidetes; Bacteroidia; Bacteroidales; Bacteroidales	254.336	0.294678	1	0.436568	1	0.731246	0.866176	4.19137	8.38728e-05	-3.96731	0.000885488	0.224067	1	9.64143	8.15208e-18	-3.9518	0.00268696	5.68963	1.77839e-09	4.19137	8.38728e-05	5.45006	4.19039e-06	9.64143	8.15208e-18
k__Bacteria(100);p__Bacteroidetes(100);c__Bacteroidia(100);o__Bacteroidales(100);o__Bacteroidales_unclassified(100);o__Bacteroidales_unclassified(100);o__Bacteroidales_unclassified(100);.6	Bacteroidetes; Bacteroidia; Bacteroidales; Bacteroidales	199.176	0.577151	0.913042	-0.512838	1	0.064313	1	2.11627	0.0377169	-1.18929	0.4279	0.926975	0.475046	4.58052	8.92528e-07	-4.97244	9.45458e-08	-0.391912	0.918147	2.11627	0.0377169	2.46426	0.0149653	4.58052	8.92528e-07
k__Bacteria(100);p__Bacteroidetes(100);c__Flavobacteriia(100);o__Flavobacteriales(100);f__[Weeksellaceae](100);g__Wautersiella(100);g__Wautersiella_unclassified(100);	Bacteroidetes; Flavobacteriia; Flavobacteriales; Weeksellaceae; Wautersiella	36.9184	0	1	0	1	0	1	-14.1981	6.36238e-08	-0.40637	1	-14.6045	6.27903e-08	-24.7391	2.87498e-24	9.13375	0.000882636	-15.6054	4.22313e-11	-14.1981	6.36238e-08	-10.541	6.01981e-05	-24.7391	2.87498e-24
k__Bacteria(100);p__Bacteroidetes(100);c__Flavobacteriia(100);o__Flavobacteriales(100);o__Flavobacteriales_unclassified(100);o__Flavobacteriales_unclassified(100);o__Flavobacteriales_unclassified(100);	Bacteroidetes; Flavobacteriia; Flavobacteriales	21.8221	-3.28469	0.217775	4.5887	0.287418	1.30401	0.861497	-5.17438	0.00531755	1.38735	0.681217	-3.78703	0.0631286	19.3353	6.92394e-28	0	1	21.7211	2.14621e-41	-5.17438	0.00531755	24.5097	6.93482e-46	19.3353	6.92394e-28
k__Bacteria(100);p__Bacteroidetes(100);p__Bacteroidetes_unclassified(100);p__Bacteroidetes_unclassified(100);p__Bacteroidetes_unclassified(100);p__Bacteroidetes_unclassified(100);p__Bacteroidetes_unclassified(100);.11	unclassified Bacteroidetes	144.784	-0.0447652	1	0.498428	1	0.453663	0.995169	2.24974	0.0296631	-0.503879	0.845199	1.74587	0.122323	10.3861	4.03676e-21	0	1	11.7129	1.11142e-32	2.24974	0.0296631	8.13631	5.83125e-13	10.3861	4.03676e-21
k__Bacteria(100);p__Bacteroidetes(100);p__Bacteroidetes_unclassified(100);p__Bacteroidetes_unclassified(100);p__Bacteroidetes_unclassified(100);p__Bacteroidetes_unclassified(100);p__Bacteroidetes_unclassified(100);.14	unclassified Bacteroidetes	120.178	-24.2423	9.94241e-64	-0.269618	1	-24.512	1.00082e-65	-23.9089	1.02983e-74	0.739198	0.812083	-23.1697	1.04913e-67	-17.0775	3.12478e-34	-5.16537	0.000325303	-22.2428	2.01359e-70	-23.9089	1.02983e-74	6.83147	3.49376e-07	-17.0775	3.12478e-34
k__Bacteria(100);p__Bacteroidetes(100);p__Bacteroidetes_unclassified(100);p__Bacteroidetes_unclassified(100);p__Bacteroidetes_unclassified(100);p__Bacteroidetes_unclassified(100);p__Bacteroidetes_unclassified(100);.16	unclassified Bacteroidetes	100.179	-3.75235	4.71992e-05	1.14627	0.871206	-2.60608	0.00946421	-3.03944	0.000188701	1.34318	0.256292	-1.69626	0.0671873	6.05902	1.909e-09	-1.10337	0.626993	4.95565	3.44001e-10	-3.03944	0.000188701	9.09846	2.26845e-20	6.05902	1.909e-09
k__Bacteria(100);p__Bacteroidetes(100);p__Bacteroidetes_unclassified(100);p__Bacteroidetes_unclassified(100);p__Bacteroidetes_unclassified(100);p__Bacteroidetes_unclassified(100);p__Bacteroidetes_unclassified(100);.27	unclassified Bacteroidetes	27.2356	-4.88905	3.12427e-06	1.58645	0.730452	-3.3026	0.00378316	-4.73138	2.7269e-07	0.552484	0.786938	-4.1789	1.51796e-05	3.24164	0.00599779	0	1	4.56853	9.8996e-06	-4.73138	2.7269e-07	7.97302	1.06144e-13	3.24164	0.00599779
k__Bacteria(100);p__Bacteroidetes(100);p__Bacteroidetes_unclassified(100);p__Bacteroidetes_unclassified(100);p__Bacteroidetes_unclassified(100);p__Bacteroidetes_unclassified(100);p__Bacteroidetes_unclassified(100);.32	unclassified Bacteroidetes	16.8786	1.60363	0.0701022	-0.44997	1	1.15366	0.236152	-1.55409	0.0170543	0.64041	0.536401	-0.913683	0.224625	3.0356	1.24145e-05	-0.038691	1	2.9969	3.05677e-07	-1.55409	0.0170543	4.58969	1.17288e-11	3.0356	1.24145e-05
k__Bacteria(100);p__Bacteroidetes(100);p__Bacteroidetes_unclassified(100);p__Bacteroidetes_unclassified(100);p__Bacteroidetes_unclassified(100);p__Bacteroidetes_unclassified(100);p__Bacteroidetes_unclassified(100);.42	unclassified Bacteroidetes	12.5635	7.35814	0.0078283	-1.7194	1	5.63874	0.0584112	24.0814	1.31559e-32	-15.0704	7.20624e-11	9.01106	0.000106559	3.09423	0.194926	-2.80554	0.422516	0.288691	1	24.0814	1.31559e-32	-20.9872	2.39428e-23	3.09423	0.194926
k__Bacteria(100);p__Bacteroidetes(100);p__Bacteroidetes_unclassified(100);p__Bacteroidetes_unclassified(100);p__Bacteroidetes_unclassified(100);p__Bacteroidetes_unclassified(100);p__Bacteroidetes_unclassified(100);.50	unclassified Bacteroidetes	8.45628	0.632518	0.926285	0.48015	1	1.11267	0.641686	-2.60865	0.0160996	0.720005	0.726082	-1.88865	0.114165	3.11091	0.00958377	1.83488	0.368267	4.94579	4.61235e-06	-2.60865	0.0160996	5.71956	5.03733e-07	3.11091	0.00958377
k__Bacteria(100);p__Bacteroidetes(100);p__Bacteroidetes_unclassified(100);p__Bacteroidetes_unclassified(100);p__Bacteroidetes_unclassified(100);p__Bacteroidetes_unclassified(100);p__Bacteroidetes_unclassified(100);.6	unclassified Bacteroidetes	291.163	0.751318	0.994002	-1.05419	1	-0.302872	1	6.45829	2.69592e-05	-6.63401	7.8057e-05	-0.17572	1	10.5337	4.14562e-11	1.51606	0.708972	12.0497	7.12388e-17	6.45829	2.69592e-05	4.07537	0.0226108	10.5337	4.14562e-11
k__Bacteria(100);p__Bacteroidetes(100);p__Bacteroidetes_unclassified(100);p__Bacteroidetes_unclassified(100);p__Bacteroidetes_unclassified(100);p__Bacteroidetes_unclassified(100);p__Bacteroidetes_unclassified(100);.7	unclassified Bacteroidetes	222.835	0.926845	0.925555	0.511747	1	1.43859	0.701098	3.6303	0.0314241	-4.42316	0.0226222	-0.792851	0.795886	8.37642	1.02947e-07	-4.31028	0.0242797	4.06614	0.00656122	3.6303	0.0314241	4.74611	0.00495729	8.37642	1.02947e-07
k__Bacteria(100);p__Cyanobacteria(100);c__Synechococcophycideae(100);o__Synechococcales(100);f__Synechococcaceae(100);g__Synechococcus(98);g__Synechococcus_unclassified(98);	Cyanobacteria; Synechococcophycideae; Synechococcales; Synechococcaceae; Synechococcus	3.27436	-1.97274	0.237884	-0.0127378	NA	-1.98547	0.245139	-5.73369	5.32474e-10	1.73519	0.083862	-3.9985	9.82163e-05	-3.05614	0.00349864	-1.67424	0.119273	-4.73038	1.0457e-07	-5.73369	5.32474e-10	2.67755	0.00149863	-3.05614	0.00349864
k__Bacteria(100);p__Deferribacteres(100);c__Deferribacteres(100);o__Deferribacterales(100);f__Deferribacteraceae(100);g__Mucispirillum(100);g__Mucispirillum_unclassified(100);	Deferribacteres; Deferribacteres; Deferribacterales; Deferribacteraceae; Mucispirillum	14.9243	-0.423152	1	-1.4722	0.986836	-1.89536	0.396396	3.19303	0.0457197	-6.77377	4.68487e-06	-3.58073	0.0115757	-3.93145	0.00264405	-0.771009	0.855866	-4.70246	8.2752e-05	3.19303	0.0457197	-7.12449	2.35706e-07	-3.93145	0.00264405
k__Bacteria(100);p__Elusimicrobia(100);c__Endomicrobia(100);c__Endomicrobia_unclassified(100);c__Endomicrobia_unclassified(100);c__Endomicrobia_unclassified(100);c__Endomicrobia_unclassified(100);.2	Elusimicrobia; Endomicrobia	31.7328	4.42267	0.00986006	-0.257423	1	4.16524	0.0170461	3.72083	0.0100838	-0.838992	0.792926	2.88184	0.065582	7.65765	6.19006e-08	-2.06521	0.367807	5.59244	7.18513e-06	3.72083	0.0100838	3.93682	0.0105788	7.65765	6.19006e-08
k__Bacteria(100);p__Firmicutes(100);c__Bacilli(100);o__Lactobacillales(100);f__Lactobacillaceae(100);f__Lactobacillaceae_unclassified(100);f__Lactobacillaceae_unclassified(100);	Firmicutes; Bacilli; Lactobacillales; Lactobacillaceae	555.242	2.1961	0.360923	-0.776566	1	1.41954	0.661418	1.66875	0.381997	4.41483	0.0118059	6.08359	4.77134e-05	6.85224	1.33098e-06	8.80935	6.17221e-09	15.6616	6.44268e-31	1.66875	0.381997	5.18349	0.00046136	6.85224	1.33098e-06
k__Bacteria(100);p__Firmicutes(100);c__Bacilli(100);o__Lactobacillales(100);f__Lactobacillaceae(100);g__Lactobacillus(100);g__Lactobacillus_unclassified(100);	Firmicutes; Bacilli; Lactobacillales; Lactobacillaceae; Lactobacillus	226.039	5.19393	0.000889033	-4.29366	0.0963612	0.900268	0.869423	5.68002	1.51191e-05	2.69247	0.150856	8.37249	1.81871e-10	10.5334	5.93377e-15	2.74911	0.198606	13.2825	4.30675e-26	5.68002	1.51191e-05	4.85334	0.000919601	10.5334	5.93377e-15
k__Bacteria(100);p__Firmicutes(100);c__Bacilli(100);o__Lactobacillales(100);o__Lactobacillales_unclassified(99);o__Lactobacillales_unclassified(99);o__Lactobacillales_unclassified(99);	Firmicutes; Bacilli; Lactobacillales	26.5681	3.0788	0.0519569	-3.23051	0.213422	-0.151713	1	3.36056	0.00747033	-2.18976	0.198546	1.1708	0.477055	7.86968	2.04038e-09	1.5892	0.583265	9.45888	7.518e-16	3.36056	0.00747033	4.50912	0.0014136	7.86968	2.04038e-09
k__Bacteria(100);p__Firmicutes(100);c__Clostridia(100);o__Clostridiales(100);f__[Mogibacteriaceae](100);f__[Mogibacteriaceae]_unclassified(100);f__[Mogibacteriaceae]_unclassified(100);	Firmicutes; Clostridia; Clostridiales; Mogibacteriaceae	38.4524	1.81742	0.236461	-1.62875	0.783259	0.188674	1	1.39533	0.263993	0.203381	1	1.59871	0.191695	8.54116	1.28078e-13	-4.38691	0.000923102	4.15425	6.42324e-06	1.39533	0.263993	7.14584	1.39147e-09	8.54116	1.28078e-13
k__Bacteria(100);p__Firmicutes(100);c__Clostridia(100);o__Clostridiales(100);f__[Mogibacteriaceae](100);f__[Mogibacteriaceae]_unclassified(100);f__[Mogibacteriaceae]_unclassified(100);.2	Firmicutes; Clostridia; Clostridiales; Mogibacteriaceae	23.8675	-0.120437	1	-0.250285	1	-0.370722	1	-3.02002	0.00668118	0.928862	0.630274	-2.09115	0.0905979	5.32984	1.55713e-05	0	1	6.65673	1.375e-09	-3.02002	0.00668118	8.34985	3.89173e-12	5.32984	1.55713e-05
k__Bacteria(100);p__Firmicutes(100);c__Clostridia(100);o__Clostridiales(100);f__Christensenellaceae(100);f__Christensenellaceae_unclassified(100);f__Christensenellaceae_unclassified(100);.13	Firmicutes; Clostridia; Clostridiales; Christensenellaceae	3.32646	0.241723	1	0.76253	NA	1.00425	0.43776	1.65117	0.0345933	0.45676	0.799372	2.10793	0.0100315	4.50358	1.20017e-06	0.700906	0.855866	5.20449	9.68153e-11	1.65117	0.0345933	2.85241	0.00462277	4.50358	1.20017e-06
k__Bacteria(100);p__Firmicutes(100);c__Clostridia(100);o__Clostridiales(100);f__Christensenellaceae(100);f__Christensenellaceae_unclassified(100);f__Christensenellaceae_unclassified(100);.6	Firmicutes; Clostridia; Clostridiales; Christensenellaceae	13.8169	2.32643	0.00297134	-0.182876	1	2.14355	0.0069638	1.67413	0.0114425	-0.332063	0.842114	1.34207	0.0598439	7.16864	1.19897e-16	0.425768	1	7.59441	1.96432e-24	1.67413	0.0114425	5.49451	8.37294e-10	7.16864	1.19897e-16
k__Bacteria(100);p__Firmicutes(100);c__Clostridia(100);o__Clostridiales(100);f__Christensenellaceae(70);g__Christensenella(67);g__Christensenella_unclassified(67);	Firmicutes; Clostridia; Clostridiales; Christensenellaceae; Christensenella	10.6476	1.24621	0.15776	0.156983	1	1.4032	0.103311	-1.51752	0.0095256	1.86742	0.00417705	0.349904	0.726426	1.40907	0.0275783	1.19642	0.172726	2.60548	1.65995e-06	-1.51752	0.0095256	2.92658	8.79008e-07	1.40907	0.0275783
k__Bacteria(100);p__Firmicutes(100);c__Clostridia(100);o__Clostridiales(100);f__Clostridiaceae(100);g__Clostridium(100);g__Clostridium_unclassified(100);	Firmicutes; Clostridia; Clostridiales; Clostridiaceae; Clostridium	56.9737	2.71209	0.407525	-1.81454	1	0.897554	0.995863	10.7062	4.85783e-08	-5.77686	0.0214697	4.92939	0.0202372	9.30589	2.27597e-06	-4.1988	0.107431	5.10709	0.00515319	10.7062	4.85783e-08	-1.40036	0.608999	9.30589	2.27597e-06
k__Bacteria(100);p__Firmicutes(100);c__Clostridia(100);o__Clostridiales(100);f__Dehalobacteriaceae(100);g__Dehalobacterium(100);g__Dehalobacterium_unclassified(100);.1	Firmicutes; Clostridia; Clostridiales; Dehalobacteriaceae; Dehalobacterium	9.02132	3.25303	0.000303053	-1.26609	0.778911	1.98694	0.037786	2.73625	0.000173483	-0.865427	0.471015	1.87082	0.0176874	7.03979	2.8111e-14	-2.42319	0.0559795	4.61661	3.77511e-12	2.73625	0.000173483	4.30354	1.30606e-05	7.03979	2.8111e-14
k__Bacteria(100);p__Firmicutes(100);c__Clostridia(100);o__Clostridiales(100);f__Dehalobacteriaceae(100);g__Dehalobacterium(100);g__Dehalobacterium_unclassified(100);.13	Firmicutes; Clostridia; Clostridiales; Dehalobacteriaceae; Dehalobacterium	2.80677	0.524243	0.743127	0.612488	NA	1.13673	0.23316	1.39816	0.0288681	-0.427913	0.742095	0.97025	0.169942	4.42167	1.38739e-07	0.0776171	1	4.49929	1.00271e-10	1.39816	0.0288681	3.02351	0.000847381	4.42167	1.38739e-07
k__Bacteria(100);p__Firmicutes(100);c__Clostridia(100);o__Clostridiales(100);f__Dehalobacteriaceae(100);g__Dehalobacterium(100);g__Dehalobacterium_unclassified(100);.8	Firmicutes; Clostridia; Clostridiales; Dehalobacteriaceae; Dehalobacterium	4.29879	3.40001	0.00104392	-2.37554	0.196779	1.02447	0.456302	2.53523	0.00155921	-0.566226	0.734312	1.96901	0.0209938	5.87089	1.01833e-09	0.342277	1	6.21317	1.48036e-13	2.53523	0.00155921	3.33566	0.00157695	5.87089	1.01833e-09
k__Bacteria(100);p__Firmicutes(100);c__Clostridia(100);o__Clostridiales(100);f__Lachnospiraceae(100);f__Lachnospiraceae_unclassified(100);f__Lachnospiraceae_unclassified(100);.25	Firmicutes; Clostridia; Clostridiales; Lachnospiraceae	14.0392	1.91783	0.157028	0.1748	1	2.09263	0.113256	1.98743	0.0530445	-0.613094	0.763548	1.37434	0.23038	4.80328	1.13596e-06	2.09303	0.176429	6.89631	2.11445e-13	1.98743	0.0530445	2.81585	0.00821853	4.80328	1.13596e-06
k__Bacteria(100);p__Firmicutes(100);c__Clostridia(100);o__Clostridiales(100);f__Lachnospiraceae(100);f__Lachnospiraceae_unclassified(100);f__Lachnospiraceae_unclassified(100);.31	Firmicutes; Clostridia; Clostridiales; Lachnospiraceae	8.35787	0	1	0	1	0	1	-14.1198	7.60028e-10	-6.94845	0.0126266	-21.0683	1.44572e-22	-15.2518	2.38828e-11	-6.3675	0.0173235	-21.6193	1.42047e-27	-14.1198	7.60028e-10	-1.13193	0.734532	-15.2518	2.38828e-11
k__Bacteria(100);p__Firmicutes(100);c__Clostridia(100);o__Clostridiales(100);f__Lachnospiraceae(100);f__Lachnospiraceae_unclassified(100);f__Lachnospiraceae_unclassified(100);.37	Firmicutes; Clostridia; Clostridiales; Lachnospiraceae	6.2678	1.06904	0.641626	-1.88952	0.699014	-0.820478	0.771852	2.38884	0.0325339	-0.793903	0.704263	1.59494	0.202153	5.69112	1.36162e-06	0	1	7.01801	1.82211e-11	2.38884	0.0325339	3.30228	0.0105788	5.69112	1.36162e-06
k__Bacteria(100);p__Firmicutes(100);c__Clostridia(100);o__Clostridiales(100);f__Lachnospiraceae(100);f__Lachnospiraceae_unclassified(100);f__Lachnospiraceae_unclassified(100);.4	Firmicutes; Clostridia; Clostridiales; Lachnospiraceae	93.2465	8.44976	0.000352851	-5.49613	0.196779	2.95363	0.363161	8.03926	5.2016e-05	-1.03169	0.847506	7.00757	0.000802064	5.92162	0.00289908	6.41105	0.00496873	12.3327	1.08665e-11	8.03926	5.2016e-05	-2.11764	0.37572	5.92162	0.00289908
k__Bacteria(100);p__Firmicutes(100);c__Clostridia(100);o__Clostridiales(100);f__Lachnospiraceae(100);f__Lachnospiraceae_unclassified(100);f__Lachnospiraceae_unclassified(100);.8	Firmicutes; Clostridia; Clostridiales; Lachnospiraceae	98.4812	1.98636	0.530904	-2.73805	0.778911	-0.751691	1	8.72825	2.54326e-07	1.91147	0.555214	10.6397	1.3778e-09	5.29766	0.00160212	6.05764	0.00157932	11.3553	2.43668e-13	8.72825	2.54326e-07	-3.43059	0.0733415	5.29766	0.00160212
k__Bacteria(100);p__Firmicutes(100);c__Clostridia(100);o__Clostridiales(100);f__Lachnospiraceae(100);f__Lachnospiraceae_unclassified(92);f__Lachnospiraceae_unclassified(92);	Firmicutes; Clostridia; Clostridiales; Lachnospiraceae	60.1648	-19.3213	3.74315e-47	-3.28376	0.18317	-22.605	1.16279e-66	-19.2918	3.48322e-57	0.925922	0.691221	-18.3659	3.16406e-49	-23.0891	5.00063e-80	-0.670815	0.888746	-23.7599	4.7546e-95	-19.2918	3.48322e-57	-3.79729	0.00160447	-23.0891	5.00063e-80
k__Bacteria(100);p__Firmicutes(100);c__Clostridia(100);o__Clostridiales(100);f__Lachnospiraceae(100);g__Clostridium(100);g__Clostridium_unclassified(100);.6	Firmicutes; Clostridia; Clostridiales; Lachnospiraceae; Clostridium	17.935	-1.72889	0.638017	5.53031	0.112341	3.80142	0.140129	4.38261	0.0219491	-2.0392	0.515091	2.34341	0.286555	-4.07926	0.0163259	0.63889	1	-3.44037	0.0382945	4.38261	0.0219491	-8.46187	1.00838e-06	-4.07926	0.0163259
k__Bacteria(100);p__Firmicutes(100);c__Clostridia(100);o__Clostridiales(100);f__Lachnospiraceae(100);g__Clostridium(56);g__Clostridium_unclassified(56);	Firmicutes; Clostridia; Clostridiales; Lachnospiraceae; Clostridium	27.5153	3.39329	0.0284149	-2.39049	0.613351	1.00279	0.755783	4.16273	0.000718253	-1.25398	0.549911	2.90875	0.0299991	8.72935	2.95052e-11	-2.75448	0.134375	5.97488	4.55332e-08	4.16273	0.000718253	4.56663	0.00132361	8.72935	2.95052e-11
k__Bacteria(100);p__Firmicutes(100);c__Clostridia(100);o__Clostridiales(100);f__Peptostreptococcaceae(100);f__Peptostreptococcaceae_unclassified(100);f__Peptostreptococcaceae_unclassified(100);	Firmicutes; Clostridia; Clostridiales; Peptostreptococcaceae	81.0353	3.64499	0.0384585	-0.679015	1	2.96598	0.119768	11.3141	8.89648e-16	-7.33006	4.03082e-06	3.984	0.00676432	6.60677	1.09047e-06	5.21332	0.00147315	11.8201	6.64574e-20	11.3141	8.89648e-16	-4.7073	0.00307674	6.60677	1.09047e-06
k__Bacteria(100);p__Firmicutes(100);c__Clostridia(100);o__Clostridiales(100);f__Ruminococcaceae(100);f__Ruminococcaceae_unclassified(100);f__Ruminococcaceae_unclassified(100);.15	Firmicutes; Clostridia; Clostridiales; Ruminococcaceae	32.8513	0.112983	1	-0.826846	1	-0.713863	0.800799	0.553479	0.741732	-0.921512	0.568694	-0.368033	0.873761	5.91262	9.05173e-09	-3.27286	0.00694526	2.63976	0.0026468	0.553479	0.741732	5.35914	3.22739e-07	5.91262	9.05173e-09
k__Bacteria(100);p__Firmicutes(100);c__Clostridia(100);o__Clostridiales(100);f__Ruminococcaceae(100);f__Ruminococcaceae_unclassified(100);f__Ruminococcaceae_unclassified(100);.19	Firmicutes; Clostridia; Clostridiales; Ruminococcaceae	26.8922	1.38139	0.170451	-1.10882	0.79049	0.272571	1	1.7535	0.0173887	-0.525844	0.703167	1.22766	0.129741	3.22824	5.06822e-06	2.50401	0.00373612	5.73225	1.15404e-18	1.7535	0.0173887	1.47474	0.0637943	3.22824	5.06822e-06
k__Bacteria(100);p__Firmicutes(100);c__Clostridia(100);o__Clostridiales(100);f__Ruminococcaceae(100);f__Ruminococcaceae_unclassified(100);f__Ruminococcaceae_unclassified(100);.21	Firmicutes; Clostridia; Clostridiales; Ruminococcaceae	23.8377	1.6382	0.426515	-0.079819	1	1.55839	0.467046	2.92658	0.0212967	-0.944072	0.680574	1.98251	0.162558	8.32654	1.64257e-10	-2.46316	0.199625	5.86338	6.63436e-08	2.92658	0.0212967	5.39996	8.83586e-05	8.32654	1.64257e-10
k__Bacteria(100);p__Firmicutes(100);c__Clostridia(100);o__Clostridiales(100);f__Ruminococcaceae(100);f__Ruminococcaceae_unclassified(100);f__Ruminococcaceae_unclassified(100);.23	Firmicutes; Clostridia; Clostridiales; Ruminococcaceae	25.4384	1.51098	0.0946531	-0.265485	1	1.24549	0.195208	1.5645	0.0256038	-0.072825	1	1.49167	0.0431428	6.41708	1.09161e-16	0.755099	0.7413	7.17218	2.04427e-25	1.5645	0.0256038	4.85258	1.28976e-09	6.41708	1.09161e-16
k__Bacteria(100);p__Firmicutes(100);c__Clostridia(100);o__Clostridiales(100);f__Ruminococcaceae(100);f__Ruminococcaceae_unclassified(100);f__Ruminococcaceae_unclassified(100);.27	Firmicutes; Clostridia; Clostridiales; Ruminococcaceae	20.7534	0.416607	0.845664	-0.32824	1	0.0883662	1	1.25296	0.0505109	-0.853433	0.339412	0.399529	0.675178	2.69522	1.18164e-05	-1.17722	0.168024	1.51801	0.00636518	1.25296	0.0505109	1.44226	0.03389	2.69522	1.18164e-05
k__Bacteria(100);p__Firmicutes(100);c__Clostridia(100);o__Clostridiales(100);f__Ruminococcaceae(100);f__Ruminococcaceae_unclassified(100);f__Ruminococcaceae_unclassified(100);.38	Firmicutes; Clostridia; Clostridiales; Ruminococcaceae	15.2209	0.470161	0.801046	-0.685654	0.976104	-0.215493	1	2.01356	0.00127276	-2.2861	0.000744861	-0.272534	0.825816	4.96023	4.50297e-11	-3.60034	9.24409e-06	1.35989	0.0198039	2.01356	0.00127276	2.94667	0.000278717	4.96023	4.50297e-11
k__Bacteria(100);p__Firmicutes(100);c__Clostridia(100);o__Clostridiales(100);f__Ruminococcaceae(100);f__Ruminococcaceae_unclassified(100);f__Ruminococcaceae_unclassified(100);.55	Firmicutes; Clostridia; Clostridiales; Ruminococcaceae	7.58584	1.48573	0.0554767	-0.739089	0.92787	0.746639	0.460213	2.3205	6.42254e-05	-2.42895	0.000114321	-0.108446	1	4.06708	9.05173e-09	-3.32232	1.07362e-05	0.744759	0.217098	2.3205	6.42254e-05	1.74658	0.0333543	4.06708	9.05173e-09
k__Bacteria(100);p__Firmicutes(100);c__Clostridia(100);o__Clostridiales(100);f__Ruminococcaceae(100);f__Ruminococcaceae_unclassified(100);f__Ruminococcaceae_unclassified(100);.57	Firmicutes; Clostridia; Clostridiales; Ruminococcaceae	8.67029	0	1	0	1	0	1	-7.76981	1.08808e-06	1.05893	0.731708	-6.71088	6.2567e-05	-3.85304	0.0254018	4.5666	0.0173235	0	1	-7.76981	1.08808e-06	3.91677	0.0155579	-3.85304	0.0254018
k__Bacteria(100);p__Firmicutes(100);c__Clostridia(100);o__Clostridiales(100);f__Ruminococcaceae(100);f__Ruminococcaceae_unclassified(100);f__Ruminococcaceae_unclassified(100);.69	Firmicutes; Clostridia; Clostridiales; Ruminococcaceae	4.95793	2.65444	0.0277995	-1.16043	0.92787	1.49401	0.280588	2.06851	0.0282052	0.100499	1	2.16901	0.0282843	4.75243	3.46305e-06	-3.82808	0.000754824	0.924355	0.387587	2.06851	0.0282052	2.68392	0.0174044	4.75243	3.46305e-06
k__Bacteria(100);p__Firmicutes(100);c__Clostridia(100);o__Clostridiales(100);f__Ruminococcaceae(100);g__Clostridium(88);s__methylpentosum(88);	Firmicutes; Clostridia; Clostridiales; Ruminococcaceae; Clostridium methylpentosum	64.5774	-3.66983	0.0946531	-1.14876	1	-4.81859	0.0147263	-5.82595	0.000244998	-2.54279	0.217382	-8.36874	8.05938e-08	-10.059	1.46077e-11	0.326224	1	-9.73273	2.75941e-12	-5.82595	0.000244998	-4.23301	0.00415623	-10.059	1.46077e-11
k__Bacteria(100);p__Firmicutes(100);c__Clostridia(100);o__Clostridiales(100);f__Ruminococcaceae(100);g__Oscillospira(100);g__Oscillospira_unclassified(100);.2	Firmicutes; Clostridia; Clostridiales; Ruminococcaceae; Oscillospira	49.7539	-2.1227	0.289872	-0.763546	1	-2.88624	0.103311	1.22503	0.497719	-0.493389	0.931045	0.73164	0.754945	3.18242	0.0196199	5.091	0.0010822	8.27342	4.61015e-11	1.22503	0.497719	1.95739	0.19389	3.18242	0.0196199
k__Bacteria(100);p__Firmicutes(100);c__Clostridia(100);o__Clostridiales(100);f__Ruminococcaceae(100);g__Ruminococcus(100);g__Ruminococcus_unclassified(100);.2	Firmicutes; Clostridia; Clostridiales; Ruminococcaceae; Ruminococcus	43.0896	5.11171	0.109127	-3.64929	0.794427	1.46242	0.893028	7.22766	0.00245842	3.06294	0.427441	10.2906	2.73657e-05	5.26072	0.0274419	5.74546	0.0469532	11.0062	2.27624e-07	7.22766	0.00245842	-1.96695	0.49038	5.26072	0.0274419
k__Bacteria(100);p__Firmicutes(100);c__Clostridia(100);o__Clostridiales(100);f__Ruminococcaceae(100);g__Ruminococcus(100);g__Ruminococcus_unclassified(100);.3	Firmicutes; Clostridia; Clostridiales; Ruminococcaceae; Ruminococcus	48.0348	-4.48128	2.04404e-05	0.157467	1	-4.32381	4.71735e-05	-4.1122	8.11637e-06	2.65536	0.018086	-1.45684	0.201666	4.58464	5.17355e-05	0	1	5.91153	3.63663e-09	-4.1122	8.11637e-06	8.69684	8.29154e-16	4.58464	5.17355e-05
k__Bacteria(100);p__Firmicutes(100);c__Clostridia(100);o__Clostridiales(100);f__Ruminococcaceae(100);g__Ruminococcus(100);g__Ruminococcus_unclassified(100);.7	Firmicutes; Clostridia; Clostridiales; Ruminococcaceae; Ruminococcus	14.1283	1.56774	0.396734	1.32751	0.941774	2.89525	0.0479673	4.3576	9.71458e-05	-4.44483	0.000308354	-0.0872376	1	4.42414	9.04988e-05	4.09081	0.00440229	8.51495	4.60158e-15	4.3576	9.71458e-05	0.0665407	1	4.42414	9.04988e-05
k__Bacteria(100);p__Firmicutes(100);c__Clostridia(100);o__Clostridiales(100);f__Ruminococcaceae(100);g__Ruminococcus(99);g__Ruminococcus_unclassified(99);	Firmicutes; Clostridia; Clostridiales; Ruminococcaceae; Ruminococcus	12.7816	0	1	0	1	0	1	0	1	-2.00429	0.489928	-1.75203	0.465737	-8.96731	1.17233e-08	5.33887	0.000923102	-3.62843	0.0286511	0	1	-9.21958	6.75536e-09	-8.96731	1.17233e-08
k__Bacteria(100);p__Firmicutes(100);c__Clostridia(100);o__Clostridiales(100);f__Ruminococcaceae(100);g__Subdoligranulum(62);s__variabile(62);	Firmicutes; Clostridia; Clostridiales; Ruminococcaceae; Subdoligranulum variabile	103.532	-2.57954	0.0490364	1.12038	0.982104	-1.45916	0.391165	2.45498	0.0232029	-2.11764	0.125348	0.337331	0.91733	8.09953	2.29579e-12	1.5892	0.522615	9.68874	3.5922e-21	2.45498	0.0232029	5.64456	2.67689e-06	8.09953	2.29579e-12
k__Bacteria(100);p__Firmicutes(100);c__Clostridia(100);o__Clostridiales(100);f__Veillonellaceae(100);f__Veillonellaceae_unclassified(100);f__Veillonellaceae_unclassified(100);.3	Firmicutes; Clostridia; Clostridiales; Veillonellaceae	13.2628	-4.49059	4.01755e-07	-0.258198	1	-4.74879	5.61333e-08	-3.13782	0.000187981	0.230472	0.959316	-2.90735	0.00104245	-5.29952	1.08382e-11	-0.102547	1	-5.40207	1.48036e-13	-3.13782	0.000187981	-2.1617	0.00147839	-5.29952	1.08382e-11
k__Bacteria(100);p__Firmicutes(100);c__Clostridia(100);o__Clostridiales(100);o__Clostridiales_unclassified(100);o__Clostridiales_unclassified(100);o__Clostridiales_unclassified(100);.10	Firmicutes; Clostridia; Clostridiales	23.7539	-0.813802	0.732948	-0.479345	1	-1.29315	0.406779	-3.37788	0.000201716	1.06531	0.459133	-2.31257	0.0206997	3.31003	0.0015152	1.58569	0.40248	4.89572	4.53164e-07	-3.37788	0.000201716	6.68791	1.25363e-11	3.31003	0.0015152
k__Bacteria(100);p__Firmicutes(100);c__Clostridia(100);o__Clostridiales(100);o__Clostridiales_unclassified(100);o__Clostridiales_unclassified(100);o__Clostridiales_unclassified(100);.15	Firmicutes; Clostridia; Clostridiales	14.3424	1.07317	0.129766	-0.112761	1	0.960406	0.187389	1.25988	0.0156577	-0.382639	0.690899	0.877236	0.126687	2.46302	2.27597e-06	-0.230025	1	2.233	4.75041e-07	1.25988	0.0156577	1.20315	0.0384785	2.46302	2.27597e-06
k__Bacteria(100);p__Firmicutes(100);c__Clostridia(100);o__Clostridiales(100);o__Clostridiales_unclassified(100);o__Clostridiales_unclassified(100);o__Clostridiales_unclassified(100);.2	Firmicutes; Clostridia; Clostridiales	89.3271	0.280191	1	0.820233	0.976104	1.10042	0.358475	0.576056	0.598713	0.740404	0.557732	1.31646	0.122615	2.75575	0.000144471	2.32944	0.00472234	5.08519	2.87554e-15	0.576056	0.598713	2.17969	0.00418472	2.75575	0.000144471
k__Bacteria(100);p__Firmicutes(100);c__Clostridia(100);o__Clostridiales(100);o__Clostridiales_unclassified(100);o__Clostridiales_unclassified(100);o__Clostridiales_unclassified(100);.20	Firmicutes; Clostridia; Clostridiales	12.6235	0.088549	1	-0.310797	1	-0.222248	1	1.8623	0.0333049	-1.31892	0.271835	0.543378	0.678961	5.42824	1.37413e-08	0.37359	1	5.80183	2.57994e-12	1.8623	0.0333049	3.56594	0.000450971	5.42824	1.37413e-08
k__Bacteria(100);p__Firmicutes(100);c__Clostridia(100);o__Clostridiales(100);o__Clostridiales_unclassified(100);o__Clostridiales_unclassified(100);o__Clostridiales_unclassified(100);.25	Firmicutes; Clostridia; Clostridiales	9.47871	-0.0307101	1	0.72627	1	0.69556	0.944084	3.2803	0.0142812	-1.60319	0.427441	1.67712	0.281052	6.55558	1.5546e-06	0	1	7.88248	1.0153e-10	3.2803	0.0142812	3.27528	0.0320208	6.55558	1.5546e-06
k__Bacteria(100);p__Firmicutes(100);c__Clostridia(100);o__Clostridiales(100);o__Clostridiales_unclassified(100);o__Clostridiales_unclassified(100);o__Clostridiales_unclassified(100);.34	Firmicutes; Clostridia; Clostridiales	4.68564	5.49942	0.000533337	-3.53118	0.225849	1.96824	0.297898	7.25063	2.698e-08	-3.45221	0.055382	3.79843	0.00412377	2.92149	0.0206336	2.21848	0.213327	5.13997	5.16185e-06	7.25063	2.698e-08	-4.32914	0.0024461	2.92149	0.0206336
k__Bacteria(100);p__Firmicutes(100);c__Clostridia(100);o__Clostridiales(100);o__Clostridiales_unclassified(100);o__Clostridiales_unclassified(100);o__Clostridiales_unclassified(100);.5	Firmicutes; Clostridia; Clostridiales	37.7176	1.52137	0.166053	1.50073	0.635161	3.02211	0.000913772	2.83687	0.000214084	-2.0888	0.0290457	0.748067	0.474736	8.85139	1.45153e-20	0	1	10.1783	1.23277e-33	2.83687	0.000214084	6.01452	1.28976e-09	8.85139	1.45153e-20
k__Bacteria(100);p__Firmicutes(100);c__Clostridia(100);o__Clostridiales(100);o__Clostridiales_unclassified(65);o__Clostridiales_unclassified(65);o__Clostridiales_unclassified(65);	Firmicutes; Clostridia; Clostridiales	18.6561	0.574637	0.932747	-1.04192	1	-0.46728	0.990801	-3.31493	0.000646543	0.753623	0.675754	-2.56131	0.014431	4.69356	4.47061e-05	0.535167	1	5.22873	3.28082e-07	-3.31493	0.000646543	8.0085	4.95489e-13	4.69356	4.47061e-05
k__Bacteria(100);p__Firmicutes(100);c__Clostridia(100);o__Clostridiales(100);o__Clostridiales_unclassified(99);o__Clostridiales_unclassified(99);o__Clostridiales_unclassified(99);	Firmicutes; Clostridia; Clostridiales	98.9004	4.6275	1.55281e-08	-3.20141	0.00687595	1.42609	0.179494	8.22833	3.83349e-28	-5.12844	3.71514e-10	3.0999	3.79192e-05	2.86788	7.14904e-05	-0.217182	1	2.6507	7.16683e-05	8.22833	3.83349e-28	-5.36045	1.18268e-11	2.86788	7.14904e-05
k__Bacteria(100);p__Firmicutes(100);c__Clostridia(100);o__Clostridiales(62);o__Clostridiales_unclassified(62);o__Clostridiales_unclassified(62);o__Clostridiales_unclassified(62);	Firmicutes; Clostridia; Clostridiales	9.76655	0.535637	0.949983	0.321402	1	0.857039	0.731056	3.71977	0.000250935	-2.60502	0.0455076	1.11475	0.383455	2.94316	0.00433522	4.60854	0.000207637	7.5517	6.17555e-14	3.71977	0.000250935	-0.776611	0.55696	2.94316	0.00433522
k__Bacteria(100);p__Firmicutes(100);c__Clostridia(100);o__Clostridiales(99);o__Clostridiales_unclassified(99);o__Clostridiales_unclassified(99);o__Clostridiales_unclassified(99);	Firmicutes; Clostridia; Clostridiales	31.9722	7.18065	0.021562	-4.98167	0.597084	2.19898	0.706508	6.35515	0.0143261	3.65631	0.346779	10.0115	0.000126208	9.40014	0.000144471	0	1	10.727	1.85824e-06	6.35515	0.0143261	3.04499	0.304759	9.40014	0.000144471
k__Bacteria(100);p__Firmicutes(100);c__Erysipelotrichi(100);o__Erysipelotrichales(100);f__Erysipelotrichaceae(100);f__Erysipelotrichaceae_unclassified(100);f__Erysipelotrichaceae_unclassified(100);	Firmicutes; Erysipelotrichi; Erysipelotrichales; Erysipelotrichaceae	112.214	2.28409	0.00154732	-0.849231	0.876758	1.43486	0.0810959	2.0284	0.0010147	1.26607	0.1298	3.29447	4.66179e-08	3.39816	8.73495e-09	-1.28531	0.101715	2.11285	0.000133855	2.0284	0.0010147	1.36975	0.0381451	3.39816	8.73495e-09
k__Bacteria(100);p__Firmicutes(100);c__Erysipelotrichi(100);o__Erysipelotrichales(100);f__Erysipelotrichaceae(100);g__Coprobacillus(100);s__cateniformis(100);	Firmicutes; Erysipelotrichi; Erysipelotrichales; Erysipelotrichaceae; Coprobacillus cateniformis	23.1845	-0.0471925	1	2.00653	0.876758	1.95933	0.44274	8.35317	5.46063e-08	-4.22879	0.038192	4.12438	0.00913334	7.14483	2.42301e-06	0.812965	0.953237	7.95779	7.88753e-09	8.35317	5.46063e-08	-1.20834	0.570115	7.14483	2.42301e-06
k__Bacteria(100);p__Firmicutes(100);p__Firmicutes_unclassified(100);p__Firmicutes_unclassified(100);p__Firmicutes_unclassified(100);p__Firmicutes_unclassified(100);p__Firmicutes_unclassified(100);.46	unclassified Firmicutes	5.05923	0.573342	0.810041	-1.85952	0.263534	-1.28618	0.206725	-1.4895	0.0454722	0.954799	0.351737	-0.5347	0.613553	4.13235	9.70059e-06	1.13301	0.617209	5.26536	1.17963e-10	-1.4895	0.0454722	5.62185	6.02952e-10	4.13235	9.70059e-06
k__Bacteria(100);p__Firmicutes(100);p__Firmicutes_unclassified(100);p__Firmicutes_unclassified(100);p__Firmicutes_unclassified(100);p__Firmicutes_unclassified(100);p__Firmicutes_unclassified(100);.5	unclassified Firmicutes	57.8456	-5.64824	2.91268e-09	-0.126021	1	-5.77426	1.19426e-09	-4.43001	2.89451e-07	-0.253883	0.977174	-4.68389	1.07503e-07	-2.06891	0.027187	-0.488258	0.898188	-2.55717	0.00242008	-4.43001	2.89451e-07	2.3611	0.00868838	-2.06891	0.027187
k__Bacteria(100);p__Firmicutes(100);p__Firmicutes_unclassified(100);p__Firmicutes_unclassified(100);p__Firmicutes_unclassified(100);p__Firmicutes_unclassified(100);p__Firmicutes_unclassified(100);.68	unclassified Firmicutes	2.5247	-1.06223	0.783162	0.385365	NA	-0.676866	0.974918	-2.70309	0.0391109	0.347512	0.970353	-2.35558	0.100973	-5.87657	1.56998e-07	2.68319	0.0208884	-3.19338	0.00512085	-2.70309	0.0391109	-3.17347	0.00279545	-5.87657	1.56998e-07
k__Bacteria(100);p__Firmicutes(100);p__Firmicutes_unclassified(100);p__Firmicutes_unclassified(100);p__Firmicutes_unclassified(100);p__Firmicutes_unclassified(100);p__Firmicutes_unclassified(100);.8	unclassified Firmicutes	36.8843	0.731415	0.846137	0.579658	1	1.31107	0.492469	2.50453	0.023769	-1.13668	0.518704	1.36785	0.290738	8.65528	1.3701e-13	-3.88808	0.00538971	4.7672	3.53878e-07	2.50453	0.023769	6.15075	4.2095e-07	8.65528	1.3701e-13
k__Bacteria(100);p__Firmicutes(100);p__Firmicutes_unclassified(100);p__Firmicutes_unclassified(100);p__Firmicutes_unclassified(100);p__Firmicutes_unclassified(100);p__Firmicutes_unclassified(100);.9	unclassified Firmicutes	26.968	4.05676	0.00688793	0.300471	1	4.35723	0.00340009	5.00167	4.2914e-05	-0.769093	0.783178	4.23257	0.00105304	9.13524	4.53494e-12	-3.54383	0.0367824	5.59141	3.43147e-07	5.00167	4.2914e-05	4.13358	0.00433979	9.13524	4.53494e-12
k__Bacteria(100);p__Lentisphaerae(100);c__[Lentisphaeria](100);o__Victivallales(100);f__Victivallaceae(100);f__Victivallaceae_unclassified(100);f__Victivallaceae_unclassified(100);.1	Lentisphaerae; Lentisphaeria; Victivallales; Victivallaceae	19.1987	-1.19443	0.208237	1.33089	0.569626	0.136465	1	3.27633	8.39623e-07	-3.19013	8.37891e-06	0.0861967	1	6.84623	8.7536e-15	0	1	8.17312	3.78713e-26	3.27633	8.39623e-07	3.5699	0.000231146	6.84623	8.7536e-15
k__Bacteria(100);p__Planctomycetes(100);c__Planctomycetia(100);o__Pirellulales(100);f__Pirellulaceae(100);f__Pirellulaceae_unclassified(100);f__Pirellulaceae_unclassified(100);	Planctomycetes; Planctomycetia; Pirellulales; Pirellulaceae	62.5712	-0.655638	0.704336	0.539123	1	-0.116515	1	-3.85163	7.58455e-09	1.41839	0.1298	-2.43324	0.000905891	-1.99306	0.00461589	2.83118	7.05718e-05	0.838122	0.317178	-3.85163	7.58455e-09	1.85858	0.00951803	-1.99306	0.00461589
k__Bacteria(100);p__Planctomycetes(100);c__Planctomycetia(100);o__Pirellulales(100);f__Pirellulaceae(100);f__Pirellulaceae_unclassified(100);f__Pirellulaceae_unclassified(100);.12	Planctomycetes; Planctomycetia; Pirellulales; Pirellulaceae	6.85706	-1.2849	0.670566	0.705915	1	0	1	-5.59496	6.82511e-07	-1.17574	0.437682	-6.7707	1.36285e-09	-6.71418	9.39157e-10	3.13882	0.00308549	-3.57536	0.00130563	-5.59496	6.82511e-07	-1.11922	0.319558	-6.71418	9.39157e-10
k__Bacteria(100);p__Planctomycetes(100);c__Planctomycetia(100);o__Pirellulales(100);f__Pirellulaceae(100);f__Pirellulaceae_unclassified(100);f__Pirellulaceae_unclassified(100);.15	Planctomycetes; Planctomycetia; Pirellulales; Pirellulaceae	6.36769	-2.74858	0.0830632	1.43912	0.92787	-1.30946	0.594729	-3.62845	0.00262091	1.98987	0.221674	-1.63857	0.267347	2.79221	0.0484462	0	1	4.11911	0.000910336	-3.62845	0.00262091	6.42066	5.31403e-07	2.79221	0.0484462
k__Bacteria(100);p__Planctomycetes(100);c__Planctomycetia(100);o__Pirellulales(100);f__Pirellulaceae(100);f__Pirellulaceae_unclassified(100);f__Pirellulaceae_unclassified(100);.4	Planctomycetes; Planctomycetia; Pirellulales; Pirellulaceae	18.8255	-0.924935	0.612131	1.3661	0.826831	0.441163	0.995169	-5.37806	2.69267e-12	2.83224	0.000908181	-2.54583	0.00405359	-0.324935	0.837976	-0.062039	1	-0.386974	0.880428	-5.37806	2.69267e-12	5.05313	2.42567e-10	-0.324935	0.837976
k__Bacteria(100);p__Planctomycetes(100);c__Planctomycetia(100);o__Pirellulales(100);f__Pirellulaceae(100);f__Pirellulaceae_unclassified(100);f__Pirellulaceae_unclassified(100);.6	Planctomycetes; Planctomycetia; Pirellulales; Pirellulaceae	19.0898	1.40201	0.447462	0.825943	1	2.22795	0.14637	-2.54467	0.0180416	1.48535	0.325914	-1.05932	0.438568	5.67076	1.61758e-06	-1.52754	0.500275	4.14321	2.53815e-05	-2.54467	0.0180416	8.21543	1.28758e-12	5.67076	1.61758e-06
k__Bacteria(100);p__Planctomycetes(100);c__vadinHA49(100);o__PeHg47(100);o__PeHg47_unclassified(100);o__PeHg47_unclassified(100);o__PeHg47_unclassified(100);	Planctomycetes; vadinHA49; PeHg47	265.119	-1.16483	0.0278095	-0.0112925	1	-1.17613	0.0280311	-2.20572	3.35447e-08	1.66294	0.000251509	-0.542786	0.298451	-3.23428	7.32076e-17	1.28019	0.00436218	-1.95409	1.27232e-07	-2.20572	3.35447e-08	-1.02856	0.0171854	-3.23428	7.32076e-17
k__Bacteria(100);p__Proteobacteria(100);c__Betaproteobacteria(100);c__Betaproteobacteria_unclassified(100);c__Betaproteobacteria_unclassified(100);c__Betaproteobacteria_unclassified(100);c__Betaproteobacteria_unclassified(100);	Proteobacteria; Betaproteobacteria	87.2212	-13.1451	1.32536e-19	2.53839	0.606159	-10.6067	1.15609e-12	-11.4717	6.36134e-18	1.48028	0.4776	-9.99143	3.43845e-13	14.6954	1.90631e-23	-14.2154	1.05672e-23	0.479937	1	-11.4717	6.36134e-18	26.1671	5.71254e-89	14.6954	1.90631e-23
k__Bacteria(100);p__Proteobacteria(100);c__Deltaproteobacteria(100);c__Deltaproteobacteria_unclassified(100);c__Deltaproteobacteria_unclassified(100);c__Deltaproteobacteria_unclassified(100);c__Deltaproteobacteria_unclassified(100);	Proteobacteria; Deltaproteobacteria	26.3862	0.0665323	1	0.369643	1	0.436175	0.777949	0.804893	0.216986	-0.44809	0.662827	0.356803	0.688038	5.76664	4.025e-17	2.91718	0.00667516	8.68382	1.21728e-34	0.804893	0.216986	4.96174	1.28014e-12	5.76664	4.025e-17
k__Bacteria(100);p__Proteobacteria(100);c__Deltaproteobacteria(100);c__Deltaproteobacteria_unclassified(100);c__Deltaproteobacteria_unclassified(100);c__Deltaproteobacteria_unclassified(100);c__Deltaproteobacteria_unclassified(100);.2	Proteobacteria; Deltaproteobacteria	9.44478	0	1	0	1	0	1	-4.163	0.00790483	3.89644	0.0440309	-0.266558	1	-7.77548	4.07167e-08	1.01752	0.756888	-6.75797	4.35881e-07	-4.163	0.00790483	-3.61249	0.00988339	-7.77548	4.07167e-08
k__Bacteria(100);p__Proteobacteria(100);c__Deltaproteobacteria(100);c__Deltaproteobacteria_unclassified(55);c__Deltaproteobacteria_unclassified(55);c__Deltaproteobacteria_unclassified(55);c__Deltaproteobacteria_unclassified(55);	Proteobacteria; Deltaproteobacteria	7.50432	-0.804371	0.861274	-0.027018	1	-0.831389	0.85682	-6.15995	3.29298e-11	1.92923	0.0516396	-4.23072	3.22624e-05	-6.82582	1.2577e-13	4.69599	1.15275e-09	-2.12983	0.0446745	-6.15995	3.29298e-11	-0.665867	0.461848	-6.82582	1.2577e-13
k__Bacteria(100);p__Proteobacteria(100);c__Deltaproteobacteria(100);o__Desulfobacterales(100);f__Desulfobacteraceae(100);g__Desulfosarcina(93);g__Desulfosarcina_unclassified(93);	Proteobacteria; Deltaproteobacteria; Desulfobacterales; Desulfobacteraceae; Desulfosarcina	344.885	-0.0939564	1	0.619265	1	0.525309	0.961451	2.14583	0.0475505	-1.22646	0.43962	0.919368	0.50787	6.26046	1.05948e-10	-4.29335	3.21269e-05	1.96711	0.0491502	2.14583	0.0475505	4.11464	5.36483e-05	6.26046	1.05948e-10
k__Bacteria(100);p__Proteobacteria(100);c__Deltaproteobacteria(100);o__Desulfovibrionales(100);f__Desulfovibrionaceae(99);f__Desulfovibrionaceae_unclassified(98);f__Desulfovibrionaceae_unclassified(98);	Proteobacteria; Deltaproteobacteria; Desulfovibrionales; Desulfovibrionaceae	11.1726	6.65805	6.92078e-08	0.253809	1	6.91186	5.9e-08	2.04433	0.0369172	0.332804	0.945257	2.37714	0.0175644	7.59107	1.37739e-12	0	1	8.91797	5.58316e-21	2.04433	0.0369172	5.54674	6.09681e-07	7.59107	1.37739e-12
k__Bacteria(100);p__Proteobacteria(100);c__Epsilonproteobacteria(100);o__Campylobacterales(100);f__Campylobacteraceae(100);g__Arcobacter(100);s__cryaerophilus(100);	Proteobacteria; Epsilonproteobacteria; Campylobacterales; Campylobacteraceae; Arcobacter cryaerophilus	53.518	-7.13215	0.00119701	11.5029	6.89346e-06	4.37076	0.119711	-4.81533	0.0153311	4.67673	0.051368	-0.138598	1	20.0193	1.21463e-27	-15.0164	2.11224e-15	5.00285	0.00820336	-4.81533	0.0153311	24.8346	2.29425e-43	20.0193	1.21463e-27
k__Bacteria(100);p__Proteobacteria(100);c__Gammaproteobacteria(100);o__Enterobacteriales(100);f__Enterobacteriaceae(100);f__Enterobacteriaceae_unclassified(93);f__Enterobacteriaceae_unclassified(93);	Proteobacteria; Gammaproteobacteria; Enterobacteriales; Enterobacteriaceae	227.001	-7.07253	5.03976e-06	5.82034	0.0088922	-1.25218	0.76218	-11.1756	7.30962e-18	10.707	3.84606e-15	-0.468663	0.940574	-10.7831	1.84523e-16	7.46047	6.01815e-10	-3.32259	0.0172772	-11.1756	7.30962e-18	0.392577	0.840733	-10.7831	1.84523e-16
k__Bacteria(100);p__Proteobacteria(100);c__Gammaproteobacteria(100);o__Pseudomonadales(100);f__Moraxellaceae(100);g__Acinetobacter(100);s__guillouiae(63);	Proteobacteria; Gammaproteobacteria; Pseudomonadales; Moraxellaceae; Acinetobacter guillouiae	40.0271	-0.0271615	1	-0.530595	1	-0.557756	1	-3.68668	0.00438307	7.30524	2.94399e-07	3.61856	0.0192801	-4.96669	4.49996e-05	8.7826	1.183e-12	3.8159	0.00284438	-3.68668	0.00438307	-1.28001	0.38162	-4.96669	4.49996e-05
k__Bacteria(100);p__Proteobacteria(100);p__Proteobacteria_unclassified(100);p__Proteobacteria_unclassified(100);p__Proteobacteria_unclassified(100);p__Proteobacteria_unclassified(100);p__Proteobacteria_unclassified(100);.10	unclassified Proteobacteria	16.306	-0.655556	0.945244	-0.398091	1	-1.05365	0.717417	-2.68928	0.0141766	2.40111	0.0837116	-0.288167	0.980314	-7.59987	2.5205e-17	-0.47024	0.834813	-8.07011	2.43748e-21	-2.68928	0.0141766	-4.91058	1.67256e-10	-7.59987	2.5205e-17
k__Bacteria(100);p__Proteobacteria(100);p__Proteobacteria_unclassified(100);p__Proteobacteria_unclassified(100);p__Proteobacteria_unclassified(100);p__Proteobacteria_unclassified(100);p__Proteobacteria_unclassified(100);.14	unclassified Proteobacteria	10.4533	0.825107	0.638017	1.09128	0.92787	1.91638	0.111173	-3.14092	1.19698e-05	4.30689	1.40109e-08	1.16598	0.219368	4.3131	8.71571e-06	0.806046	0.819865	5.11915	1.59351e-09	-3.14092	1.19698e-05	7.45402	8.9529e-16	4.3131	8.71571e-06
k__Bacteria(100);p__Proteobacteria(100);p__Proteobacteria_unclassified(100);p__Proteobacteria_unclassified(100);p__Proteobacteria_unclassified(100);p__Proteobacteria_unclassified(100);p__Proteobacteria_unclassified(100);.19	unclassified Proteobacteria	7.28998	-3.96519	0.00887758	1.1822	1	-2.78299	0.116345	-6.72728	1.4814e-08	2.75285	0.047973	-3.97443	0.00273603	0.404832	0.898428	0	1	1.73173	0.290969	-6.72728	1.4814e-08	7.13212	6.53044e-09	0.404832	0.898428
k__Bacteria(100);p__Proteobacteria(100);p__Proteobacteria_unclassified(100);p__Proteobacteria_unclassified(100);p__Proteobacteria_unclassified(100);p__Proteobacteria_unclassified(100);p__Proteobacteria_unclassified(100);.28	unclassified Proteobacteria	5.00089	-0.693302	1	0.324456	1	-0.368845	1	-0.504796	0.971939	-2.84888	0.198956	-3.35368	0.0591387	-7.27566	8.80885e-07	4.18915	0.00756342	-3.08651	0.0516185	-0.504796	0.971939	-6.77087	8.25986e-06	-7.27566	8.80885e-07
k__Bacteria(100);p__Spirochaetes(100);c__Spirochaetes(100);o__Spirochaetales(100);f__Spirochaetaceae(100);g__Treponema(100);g__Treponema_unclassified(100);	Spirochaetes; Spirochaetes; Spirochaetales; Spirochaetaceae; Treponema	69.8678	2.57745	0.000895222	0.148687	1	2.72614	0.000381968	1.76135	0.0104351	0.108444	1	1.86979	0.00835265	3.70935	8.94122e-09	-1.12468	0.23347	2.58467	1.20384e-05	1.76135	0.0104351	1.948	0.00514428	3.70935	8.94122e-09
k__Bacteria(100);p__SR1(100);p__SR1_unclassified(100);p__SR1_unclassified(100);p__SR1_unclassified(100);p__SR1_unclassified(100);p__SR1_unclassified(100);	unclassified SR1	38.9229	4.09949	0.00834316	-1.61091	0.918572	2.48859	0.169786	5.27854	2.7286e-05	0.084541	1	5.36309	3.79235e-05	9.62576	1.09316e-12	-0.150569	1	9.4752	3.68143e-15	5.27854	2.7286e-05	4.34722	0.00334176	9.62576	1.09316e-12
k__Bacteria(100);p__SR1(100);p__SR1_unclassified(100);p__SR1_unclassified(100);p__SR1_unclassified(100);p__SR1_unclassified(100);p__SR1_unclassified(100);.1	unclassified SR1	24.9121	2.16471	0.343999	-1.5715	0.976104	0.59321	1	5.76635	5.22041e-05	-2.23807	0.29806	3.52828	0.0225462	3.6667	0.010893	5.90477	0.000236957	9.57147	7.96259e-13	5.76635	5.22041e-05	-2.09965	0.201127	3.6667	0.010893
k__Bacteria(100);p__Synergistetes(100);c__Synergistia(100);o__Synergistales(100);f__Synergistaceae(100);g__Candidatus_Tammella(100);g__Candidatus_Tammella_unclassified(100);	Synergistetes; Synergistia; Synergistales; Synergistaceae; Candidatus Tammella	117.538	-0.832521	0.143738	-0.00252518	1	-0.835046	0.143181	0.160271	0.896076	-1.33419	0.00402355	-1.17391	0.00648791	0.904991	0.0340303	-2.09649	1.2712e-07	-1.1915	0.00137703	0.160271	0.896076	0.74472	0.10074	0.904991	0.0340303
k__Bacteria(100);p__Tenericutes(100);c__Mollicutes(100);o__Acholeplasmatales(100);f__Acholeplasmataceae(100);g__Acholeplasma(100);g__Acholeplasma_unclassified(100);	Tenericutes; Mollicutes; Acholeplasmatales; Acholeplasmataceae; Acholeplasma	206.162	1.76137	0.0847415	1.00612	0.901126	2.76749	0.00221603	4.21973	6.41865e-09	-0.611964	0.675754	3.60777	2.43491e-06	10.6225	1.81061e-33	2.49937	0.0848033	13.1219	1.02612e-55	4.21973	6.41865e-09	6.4028	2.79381e-12	10.6225	1.81061e-33
k__Bacteria(100);p__Tenericutes(100);c__Mollicutes(100);o__Acholeplasmatales(100);f__Acholeplasmataceae(100);g__Acholeplasma(93);g__Acholeplasma_unclassified(93);	Tenericutes; Mollicutes; Acholeplasmatales; Acholeplasmataceae; Acholeplasma	264.914	2.18817	0.00127936	0.0397069	1	2.22788	0.00100686	2.77099	7.36102e-07	-0.346995	0.793816	2.424	3.77486e-05	4.62588	2.69789e-17	-1.34449	0.0596692	3.28139	7.93492e-11	2.77099	7.36102e-07	1.85488	0.00198766	4.62588	2.69789e-17
k__Bacteria(100);p__Tenericutes(100);c__Mollicutes(100);o__RF39(100);o__RF39_unclassified(100);o__RF39_unclassified(100);o__RF39_unclassified(100);.1	Tenericutes; Mollicutes; RF39	16.7035	2.80473	0.143668	0.107594	1	2.91232	0.124451	9.21179	8.85581e-11	0	1	8.9577	1.13723e-09	5.60894	4.26514e-05	-1.13824	0.73105	4.4707	0.000315532	9.21179	8.85581e-11	-3.60285	0.0292186	5.60894	4.26514e-05
k__Bacteria(100);p__Tenericutes(100);c__Mollicutes(100);o__RsaHF231(100);o__RsaHF231_unclassified(100);o__RsaHF231_unclassified(100);o__RsaHF231_unclassified(100);.1	Tenericutes; Mollicutes; RsaHF231	33.7571	-2.37089	0.0204704	1.80934	0.457209	-0.561553	0.867889	1.08777	0.292504	0.158835	1	1.24661	0.21912	3.57993	5.88781e-05	-5.25757	1.30932e-09	-1.67764	0.039855	1.08777	0.292504	2.49216	0.00883708	3.57993	5.88781e-05
k__Bacteria(100);p__Verrucomicrobia(100);c__Opitutae(100);o__[Cerasicoccales](100);f__[Cerasicoccaceae](100);f__[Cerasicoccaceae]_unclassified(100);f__[Cerasicoccaceae]_unclassified(100);.1	Verrucomicrobia; Opitutae; Cerasicoccales; Cerasicoccaceae	18.3306	1.05681	0.64449	-1.84051	0.699014	-0.783705	0.801861	0.131933	1	1.10659	0.523248	1.23852	0.347009	2.79904	0.00977836	3.90013	0.0030695	6.69917	9.05654e-11	0.131933	1	2.66711	0.0173648	2.79904	0.00977836
k__Bacteria(100);p__Verrucomicrobia(100);c__Verruco-5(100);o__LD1-PB3(100);o__LD1-PB3_unclassified(100);o__LD1-PB3_unclassified(100);o__LD1-PB3_unclassified(100);	Verrucomicrobia; Verruco-5; LD1-PB3	43.7019	2.50085	0.0369814	0.109854	1	2.6107	0.0297646	6.4215	1.32379e-12	-3.2733	0.00350164	3.1482	0.00136302	9.09333	2.1766e-17	1.87466	0.351874	10.968	2.30005e-30	6.4215	1.32379e-12	2.67184	0.0332833	9.09333	2.1766e-17
k__Bacteria(100);p__Verrucomicrobia(100);c__Verruco-5(100);o__WCHB1-41(100);f__RFP12(100);f__RFP12_unclassified(100);f__RFP12_unclassified(100);	Verrucomicrobia; Verruco-5; WCHB1-41; RFP12	54.2304	-0.0736331	1	0.817846	1	0.744213	0.918085	2.89458	0.0296631	-0.61486	0.858228	2.27972	0.116199	4.6205	0.000219703	4.98941	0.000870832	9.6099	1.57078e-15	2.89458	0.0296631	1.72592	0.235941	4.6205	0.000219703
